# Supplementary material for: Reconciliation of Genome-Scale Metabolic Reconstructions for Comparative Systems Analysis
Source: PLoS Comput Biol. 2011 Mar 31;7(3):e1001116. doi: 10.1371/journal.pcbi.1001116 (PMC3068926; doi:10.1371/journal.pcbi.1001116)
Supplement: Text S1 — Supplementary tables. (10.03 MB XLS) [file pcbi.1001116.s001.xls]

## Sheet: 1 paovsppu_BLAST
Table 1: PAO vs PPU BLAST results
PAO Gene	PPU Gene	High score	P(N)	N	Reverse match	Reverse agreement	In PAO model	Protein agreement (ie, did protein blast agree?)	BLAST identities	BLAST percent identity
PA1984	PP0545	5682	3.3e-253	1	PA4022	No	Yes	No	1310/1521	0.86	..
PA2400	PP4219	5500	3e-255	2	PA2424	No	No	No	1676/3112	0.53	..
PA4133	PP4255	5133	2.1e-228	1	PA1554	No	Yes	No	1197/1401	0.85	..
PA0296	PP5184	5087	2.7e-226	1	PA2040	No	Yes	No	1179/1378	0.85	..
PA4266	PP4111	4942	4.3e-282	2	PA2071	No	No	No	1272/1601	0.79	..
PA1856	PP4255	4942	9.1e-220	1	PA1554	No	Yes	No	1194/1430	0.83	..
PA2527	PP3583	4781	7.9e-213	1	PA2526	No	No	No	2043/3160	0.64	..
PA4199	PP0370	4714	1.5e-209	1	PA0508	No	No	No	1348/1799	0.74	..
PA2444	PP0322	4469	2.4e-198	1	PA5415	No	Yes	No	1067/1261	0.84	..
PA4500	PP0884	4423	2.3e-196	1	PA4496	No	No	No	1227/1601	0.76	..
PA0507	PP0368	4387	8.5e-195	1	PA0506	No	No	No	1333/1817	0.73	..
PA4309	PP2249	4385	9.8e-195	1	PA4310	No	No	No	1375/1909	0.72	..
PA1326	PP5149	4349	5.3e-193	1	PA0331	No	Yes	No	1181/1528	0.77	..
PA2291	PP1019	4286	4.2e-190	1	PA3186	No	No	No	1078/1318	0.81	..
PA0875	PP1264	4218	3e-187	1	PA3893	No	No	No	1502/2196	0.68	..
PA1253	PP2585	4151	4.4e-184	1	PA2217	No	No	No	1193/1594	0.74	..
PA3000	PP4495	4140	1.5e-183	1	PA0866	No	Yes	No	1100/1407	0.78	..
PA4307	PP2249	3947	5.9e-175	1	PA4310	No	No	No	1331/1915	0.69	..
PA1944	PP2956	3824	2.6e-169	1	PA1345	No	No	No	1112/1492	0.74	..
PA3522	PP3426	3769	3.9e-167	1	PA2494	No	No	No	1455/2174	0.66	..
PA5522	PP4547	3659	8.5e-162	1	PA1566	No	Yes	No	1045/1384	0.75	..
PA4814	PP2008	3651	1.3e-161	1	PA3092	No	Yes	No	1257/1797	0.69	..
PA1436	PP3583	3537	1.2e-156	1	PA2526	No	No	No	1893/3126	0.6	..
PA5187	PP0368	3494	1.8e-154	1	PA0506	No	No	No	1230/1810	0.67	..
PA4376	PP4868	3482	9.5e-154	1	PA4919	No	Yes	No	930/1201	0.77	..
PA2058	PP4147	3389	1e-149	1	PA1810	No	No	No	1233/1828	0.67	..
PA3421	PP0766	3230	2e-142	1	PA3922	No	No	No	1006/1390	0.72	..
PA3406	PP2560	3116	2.3e-137	1	PA1246	No	No	No	1170/1741	0.67	..
PA2061	PP4150	2973	7e-131	1	PA1807	No	No	No	1085/1587	0.68	..
PA2059	PP4148	2928	1.1e-128	1	PA1809	No	No	No	824/1086	0.75	..
PA3570	PP4667	2832	1.7e-124	1	PA0747	No	Yes	No	984/1431	0.68	..
PA4497	PP5283	2808	2e-123	1	PA5317	No	No	No	1050/1569	0.66	..
PA3044	PP2100	2784	1.1e-122	1	PA3946	No	No	No	1336/2103	0.63	..
PA2616	PP0786	2731	1e-119	1	PA0849	No	Yes	No	737/950	0.77	..
PA2356	PP0238	2726	1.4e-119	1	PA3444	No	No	No	818/1132	0.72	..
PA4633	PP3557	2704	7.4e-119	1	PA2654	No	No	No	1348/2183	0.61	..
PA0134	PP4281	2699	2e-118	1	PA1521	No	Yes	No	893/1285	0.69	..
PA0287	PP4524	2697	2.4e-118	1	PA1418	No	No	No	931/1344	0.69	..
PA0084	PP3099	2671	3.3e-117	1	PA2366	No	No	No	997/1487	0.67	..
PA2891	PP4067	2647	3.1e-116	1	PA2012	No	No	No	1133/1727	0.65	..
PA3925	PP2215	2642	8.4e-116	1	PA2553	No	No	No	846/1192	0.7	..
PA2371	PP3095	2635	7.9e-116	1	PA0090	No	No	No	1551/2516	0.61	..
PA1284	PP0368	2588	1.5e-113	1	PA0506	No	No	No	834/1180	0.7	..
PA0686	PP1047	2587	2.1e-113	1	PA3103	No	No	No	977/1442	0.67	..
PA2359	PP2771	2522	2.4e-110	1	PA2354	No	No	No	764/1045	0.73	..
PA0321	PP5340	2508	1.1e-109	1	PA1409	No	No	No	760/1035	0.73	..
PA3327	PP4220	2505	2.8e-105	1	PA2402	No	No	No	3973/7188	0.55	..
PA3081	PP0766	2494	3.6e-109	1	PA3922	No	No	No	942/1397	0.67	..
PA3038	PP1419	2476	2.4e-108	1	PA0755	No	No	No	876/1274	0.68	..
PA1590	PP4184	2421	7.3e-106	1	PA1971	No	Yes	No	901/1341	0.67	..
PA5452	PP1776	2402	4.8e-105	1	PA2232	No	Yes	No	944/1447	0.65	..
PA5442	PP0386	2399	2.5e-105	1	PA0575	No	No	No	1151/1822	0.63	..
PA1662	PP3095	2372	6e-104	1	PA0090	No	No	No	1498/2449	0.61	..
PA2888	PP4065	2325	1.3e-101	1	PA2014	No	No	No	1051/1614	0.65	..
PA4887	PP4398	2314	4.9e-101	1	PA3355	No	No	No	866/1310	0.66	..
PA3310	PP4592	2308	7.5e-101	1	PA1972	No	No	No	1048/1661	0.63	..
PA0876	PP1262	2300	3e-100	1	PA3895	No	No	No	676/925	0.73	..
PA1410	PP5341	2290	7.2e-100	1	PA0300	No	No	No	756/1097	0.68	..
PA2472	PP1376	2284	1.1e-99	1	PA0235	No	No	No	902/1346	0.67	..
PA5250	PP0146	2247	8.7e-98	1	PA5469	No	No	No	597/753	0.79	..
PA3760	PP0793	2222	3.3e-97	1	PA3562	No	Yes	No	1528/2560	0.59	..
PA2272	PP1331	2219	7.3e-97	1	PA4418	No	No	No	1067/1711	0.62	..
PA1556	PP4256	2205	9e-96	1	PA1553	No	Yes	No	521/612	0.85	..
PA0494	PP0558	2199	7.5e-96	1	PA4848	No	No	No	893/1374	0.64	..
PA0602	PP0412	2188	3.1e-95	1	PA0604	No	Yes	No	710/998	0.71	..
PA3641	PP0496	2188	2.2e-95	1	PA2252	No	No	No	934/1418	0.65	..
PA1181	PP1761	2173	5.2e-95	1	PA0861	No	No	No	1159/1883	0.61	..
PA2060	PP4149	2160	5.8e-94	1	PA1808	No	No	No	584/756	0.77	..
PA4130	PP2371	2157	4.9e-94	1	PA1838	No	Yes	No	1037/1629	0.63	..
PA4898	PP1383	2149	1.5e-93	1	PA0240	No	No	No	827/1253	0.66	..
PA1025	PP1419	2143	2.7e-93	1	PA0755	No	No	No	837/1253	0.66	..
PA3280	PP0037	2143	2.7e-93	1	PA3279	No	No	No	647/890	0.72	..
PA0222	PP0412	2128	1.6e-92	1	PA0604	No	No	No	710/1010	0.7	..
PA3588	PP1419	2102	1.9e-91	1	PA0755	No	No	No	820/1243	0.65	..
PA3422	PP0765	2101	4.6e-112	2	PA3923	No	No	No	645/878	0.73	..
PA2213	PP1383	2073	4e-90	1	PA0240	No	No	No	837/1272	0.65	..
PA2302	PP4219	2002	2.4e-82	1	PA2424	No	No	No	3638/6578	0.55	..
PA5313	PP0596	1997	1e-86	1	PA0132	No	No	No	873/1351	0.64	..
PA1194	PP1002	1992	1.6e-86	1	PA5170	No	Yes	No	868/1350	0.64	..
PA3589	PP3280	1992	1.9e-86	1	PA0228	No	No	No	808/1233	0.65	..
PA1505	PP4597	1986	4.3e-86	1	PA3870	No	No	No	696/1005	0.69	..
PA1938	PP4420	1984	6.5e-86	1	PA0978	No	No	No	588/812	0.72	..
PA3465	PP5251	1963	2.9e-85	1	PA2701	No	No	No	1037/1658	0.62	..
PA0383	PP0766	1925	1.8e-83	1	PA3922	No	No	No	877/1378	0.63	..
PA2688	PP2242	1880	1.2e-81	1	PA0931	No	No	No	1234/2074	0.59	..
PA3914	PP2123	1834	2.6e-79	1	PA3028	No	No	No	820/1259	0.65	..
PA2652	PP3557	1832	1.8e-79	1	PA2654	No	No	No	1022/1633	0.62	..
PA2926	PP4483	1822	1.4e-78	1	PA0892	No	No	No	560/776	0.72	..
PA3865	PP4486	1808	6e-78	1	PA0888	No	No	No	554/766	0.72	..
PA4189	PP2589	1805	4.3e-78	1	PA0219	No	Yes	No	737/1114	0.66	..
PA1511	PP2614	1787	1.9e-77	1	PA0262	No	No	No	977/1597	0.61	..
PA1270	PP1150	1785	2.6e-77	1	PA3305	No	No	No	1079/1779	0.6	..
PA1737	PP2136	1777	5.5e-77	1	PA3014	No	Yes	No	1111/1868	0.59	..
PA2207	PP1416	1773	1.2e-76	1	PA0752	No	No	No	941/1539	0.61	..
PA1600	PP3948	1772	4.1e-76	1	PA1601	No	No	No	826/1300	0.63	..
PA2341	PP1018	1763	4.4e-76	1	PA3187	No	Yes	No	745/1129	0.65	..
PA4100	PP5064	1756	6.2e-76	1	PA5372	No	Yes	No	1012/1673	0.6	..
PA4208	PP3427	1753	1e-75	1	PA2495	No	No	No	893/1436	0.62	..
PA1171	PP4798	1744	2.8e-75	1	PA3992	No	No	No	762/1178	0.64	..
PA4977	PP1394	1737	4.6e-75	1	PA1417	No	No	No	851/1344	0.63	..
PA3590	PP3282	1737	5e-75	1	PA1628	No	No	No	927/1497	0.61	..
PA4225	PP4243	1721	1.1e-69	1	PA2424	No	No	No	3099/5596	0.55	..
PA3462	PP4824	1710	4.5e-74	1	PA4856	No	No	No	1430/2436	0.58	..
PA4137	PP1419	1709	1.1e-73	1	PA0755	No	No	No	825/1291	0.63	..
PA0041	PP4243	1698	3.9e-68	1	PA2424	No	No	No	4742/8775	0.54	..
PA2305	PP4221	1687	9.4e-69	1	PA2400	No	No	No	2079/3638	0.57	..
PA4613	PP0481	1687	9.5e-73	1	PA4236	No	Yes	No	775/1220	0.63	..
PA1697	PP4366	1654	3.1e-71	1	PA1104	No	Yes	No	832/1325	0.62	..
PA4511	PP4577	1648	1e-70	1	PA2112	No	No	No	524/743	0.7	..
PA1923	PP3507	1643	4.9e-67	1	PA2944	No	Yes	No	2129/3769	0.56	..
PA0288	PP4523	1640	1.9e-70	1	PA1421	No	Yes	No	636/967	0.65	..
PA2317	PP3146	1631	3.6e-70	1	PA5309	No	No	No	817/1312	0.62	..
PA2677	PP1047	1630	3.5e-70	1	PA3103	No	No	No	772/1229	0.62	..
PA0159	PP1262	1626	8.2e-70	1	PA3895	No	No	No	626/939	0.66	..
PA4112	PP1650	1622	9.3e-69	1	PA0928	No	No	No	1638/2863	0.57	..
PA1142	PP1727	1614	3.8e-69	1	PA3249	No	No	No	506/702	0.72	..
PA0178	PP4338	1613	1.3e-69	1	PA1458	No	No	No	1013/1690	0.59	..
PA2920	PP1228	1607	2.7e-69	1	PA2654	No	No	No	955/1552	0.61	..
PA4344	PP2704	1606	5.3e-69	1	PA2922	No	No	No	716/1109	0.64	..
PA4520	PP4658	1594	1.1e-68	1	PA5072	No	No	No	1186/2000	0.59	..
PA3438	PP1823	1588	7.1e-68	1	PA1674	No	Yes	No	420/533	0.78	..
PA4226	PP4219	1588	7e-64	1	PA2424	No	No	No	2454/4403	0.55	..
PA0886	PP1167	1584	4.8e-68	1	PA5169	No	Yes	No	798/1305	0.61	..
PA0746	PP2216	1581	7.4e-68	1	PA2552	No	No	No	723/1137	0.63	..
PA3595	PP1458	1576	1.1e-67	1	PA3749	No	No	No	788/1241	0.63	..
PA0870	PP3590	1576	1.2e-67	1	PA3139	No	Yes	No	760/1205	0.63	..
PA4885	PP2158	1574	2.5e-67	1	PA2809	No	No	No	492/679	0.72	..
PA3579	PP1075	1571	1.7e-127	2	PA3582	No	Yes	No	587/880	0.66	..
PA3523	PP3425	1562	4.9e-67	1	PA2493	No	No	No	692/1087	0.63	..
PA2079	PP0927	1561	4.9e-67	1	PA3000	No	No	No	821/1325	0.61	..
PA2748	PP1590	1519	6.8e-65	1	PA3657	No	No	No	525/761	0.68	..
PA0166	PP3992	1503	2e-64	1	PA0352	No	Yes	No	833/1347	0.61	..
PA0834	PP0332	1499	4.8e-64	1	PA0461	No	No	No	583/880	0.66	..
PA2788	PP4658	1492	4.6e-64	1	PA5072	No	No	No	984/1625	0.6	..
PA2022	PP2926	1492	6.6e-64	1	PA3559	No	Yes	No	768/1208	0.63	..
PA0848	PP1084	1491	1.6e-63	1	PA3529	No	No	No	441/606	0.72	..
PA0326	PP1484	1491	9.4e-64	1	PA3607	No	Yes	No	659/1014	0.64	..
PA4930	PP5269	1484	1.9e-63	1	PA5302	No	Yes	No	700/1102	0.63	..
PA0687	PP1048	1480	2.5e-63	1	PA3102	No	No	No	764/1226	0.62	..
PA0550	PP4298	1465	1.9e-62	1	PA1501	No	No	No	535/782	0.68	..
PA4192	PP1068	1461	2.9e-62	1	PA1339	No	Yes	No	519/747	0.69	..
PA4526	PP5190	1458	1.8e-62	1	PA5210	No	No	No	864/1428	0.6	..
PA1247	PP2559	1453	3.8e-62	1	PA3405	No	No	No	795/1316	0.6	..
PA0510	PP3999	1443	1e-61	1	PA2611	No	Yes	No	515/735	0.7	..
PA1663	PP4696	1441	1.2e-61	1	PA4726	No	No	No	741/1187	0.62	..
PA0273	PP3751	1437	2.2e-61	1	PA2500	No	No	No	765/1206	0.63	..
PA2382	PP4736	1420	1.4e-60	1	PA4771	No	Yes	No	726/1178	0.61	..
PA3283	PP2398	1417	2.6e-60	1	PA4106	No	No	No	551/824	0.66	..
PA4547	PP2771	1416	2.2e-60	1	PA2354	No	No	No	594/915	0.64	..
PA5538	PP4897	1392	2e-59	1	PA4947	No	No	No	582/903	0.64	..
PA3521	PP3427	1390	2.5e-59	1	PA2495	No	No	No	878/1445	0.6	..
PA4123	PP3646	1386	3.6e-59	1	PA3504	No	Yes	No	684/1077	0.63	..
PA2125	PP5063	1377	9.3e-59	1	PA5373	No	Yes	No	881/1491	0.59	..
PA5093	PP5032	1372	1.5e-58	1	PA5098	No	Yes	No	932/1538	0.6	..
PA3479	PP1408	1359	1e-57	1	PA0730	No	Yes	No	563/852	0.66	..
PA2693	PP5356	1350	4.7e-57	1	PA5519	No	No	No	358/465	0.76	..
PA1631	PP2216	1346	3.1e-57	1	PA2552	No	No	No	694/1114	0.62	..
PA4136	PP0589	1342	4.4e-57	1	PA3573	No	No	No	748/1202	0.62	..
PA1703	PP4344	1337	4.1e-57	1	PA1452	No	No	No	753/1234	0.61	..
PA1256	PP5022	1325	4.2e-56	1	PA5074	No	Yes	No	479/694	0.69	..
PA1930	PP0779	1316	5.8e-56	1	PA1423	No	No	No	744/1216	0.61	..
PA2838	PP3493	1310	1.6e-55	1	PA0159	No	No	No	614/964	0.63	..
PA4221	PP4217	1306	2.4e-55	1	PA4168	No	No	No	1142/1994	0.57	..
PA5082	PP1071	1295	7.5e-55	1	PA1342	No	No	No	585/901	0.64	..
PA5510	PP2802	1293	6.4e-55	1	PA3597	No	No	No	805/1332	0.6	..
PA2303	PP4222	1283	2.5e-54	1	PA2304	No	No	No	617/976	0.63	..
PA0206	PP5168	1278	4.1e-54	1	PA0280	No	Yes	No	518/798	0.64	..
PA0091	PP3106	1273	3.7e-54	1	PA0095	No	No	No	869/1442	0.6	..
PA4391	PP1357	1271	7.5e-54	1	PA4390	No	No	No	637/1027	0.62	..
PA1437	PP1438	1268	1.7e-53	1	PA2523	No	No	No	448/670	0.66	..
PA1918	PP2549	1250	5.4e-53	1	PA1567	No	Yes	No	660/1072	0.61	..
PA2685	PP3106	1249	4.5e-53	1	PA0095	No	No	No	825/1379	0.59	..
PA1196	PP4371	1249	6.1e-53	1	PA1099	No	No	No	837/1394	0.6	..
PA2017	PP5151	1237	3.2e-52	1	PA0327	No	No	No	583/908	0.64	..
PA4776	PP4225	1232	7.1e-52	1	PA2479	No	No	No	458/673	0.68	..
PA4435	PP4064	1225	7.9e-52	1	PA2015	No	No	No	697/1148	0.6	..
PA5096	PP3558	1218	2e-51	1	PA5103	No	No	No	462/696	0.66	..
PA4078	PP4221	1215	2.5e-47	1	PA2400	No	No	No	1527/2703	0.56	..
PA3915	PP2122	1210	8.9e-51	1	PA3029	No	No	No	384/530	0.72	..
PA4915	PP5020	1207	3.4e-51	1	PA5072	No	No	No	933/1607	0.58	..
PA2073	PP3655	1200	9.6e-51	1	PA5099	No	Yes	No	876/1476	0.59	..
PA1667	PP4080	1185	4.8e-50	1	PA0079	No	No	No	791/1362	0.58	..
PA4222	PP2596	1185	3.6e-50	1	PA4223	No	No	No	1027/1755	0.58	..
PA2514	PP3163	1173	2.2e-49	1	PA2516	No	No	No	637/1044	0.61	..
PA4886	PP2157	1173	1.7e-49	1	PA2810	No	No	No	839/1404	0.59	..
PA1400	PP5347	1159	6.5e-62	2	PA5436	No	Yes	No	535/851	0.62	..
PA1736	PP3280	1156	1.1e-48	1	PA0228	No	Yes	No	748/1250	0.59	..
PA3517	PP1379	1150	1.8e-48	1	PA0230	No	Yes	No	792/1325	0.59	..
PA3781	PP1167	1144	3.6e-48	1	PA5169	No	No	No	754/1292	0.58	..
PA2006	PP3740	1141	4.7e-48	1	PA4903	No	No	No	797/1352	0.58	..
PA1760	PP0767	1140	2.1e-44	1	PA3921	No	No	No	1346/2412	0.55	..
PA2889	PP2216	1138	7.6e-48	1	PA2552	No	No	No	678/1130	0.6	..
PA2596	PP3228	1131	1.8e-47	1	PA2595	No	No	No	591/951	0.62	..
PA5476	PP2703	1131	1.1e-47	1	PA0703	No	Yes	No	735/1230	0.59	..
PA4571	PP3382	1130	2.5e-80	2	PA2266	No	No	No	458/688	0.66	..
PA3416	PP0554	1129	2.1e-47	1	PA4151	No	Yes	No	593/953	0.62	..
PA3578	PP4315	1126	3.8e-47	1	PA2770	No	No	No	498/779	0.63	..
PA2435	PP4261	1120	9.9e-45	1	PA1549	No	No	No	1128/1982	0.56	..
PA4607	PP0679	1117	1.5e-46	1	PA4578	No	No	No	359/500	0.71	..
PA2924	PP4485	1116	1.2e-46	1	PA0889	No	Yes	No	458/699	0.65	..
PA2583	PP2100	1109	2.8e-70	3	PA3946	No	No	No	641/1039	0.61	..
PA2420	PP0799	1109	1.3e-46	1	PA0162	No	No	No	685/1117	0.61	..
PA1438	PP2157	1105	2e-46	1	PA2810	No	No	No	793/1346	0.58	..
PA1187	PP4064	1100	3.5e-46	1	PA2015	No	No	No	684/1144	0.59	..
PA5266	PP2614	1099	1.6e-43	1	PA0262	No	No	No	959/1673	0.57	..
PA1799	PP1181	1094	1.2e-45	1	PA1157	No	No	No	456/700	0.65	..
PA2567	PP0337	1093	4.1e-45	1	PA5017	No	No	No	845/1427	0.59	..
PA0396	PP5093	1090	1.2e-45	1	PA0395	No	No	No	592/986	0.6	..
PA4322	PP2032	1088	1.6e-45	1	PA3070	No	No	No	552/886	0.62	..
PA1361	PP5262	1088	1.1e-45	1	PA5294	No	No	No	790/1354	0.58	..
PA0325	PP5178	1082	3.1e-45	1	PA0303	No	Yes	No	572/934	0.61	..
PA0480	PP1380	1072	1e-44	1	PA0231	No	No	No	480/755	0.63	..
PA2573	PP5020	1072	4.3e-45	1	PA5072	No	No	No	780/1313	0.59	..
PA1231	PP0178	1069	1.3e-44	1	PA3892	No	No	No	541/854	0.63	..
PA3608	PP5178	1068	1.3e-44	1	PA0303	No	Yes	No	544/870	0.62	..
PA3255	PP1721	1065	2.6e-44	1	PA1143	No	No	No	395/591	0.66	..
PA0184	PP0209	1063	2.4e-44	1	PA2294	No	No	No	487/764	0.63	..
PA2512	PP3161	1063	1.5e-44	1	PA2518	No	No	No	781/1322	0.59	..
PA2875	PP2032	1057	4.1e-44	1	PA3070	No	No	No	489/767	0.63	..
PA0141	PP0712	1056	5.3e-44	1	PA2428	No	No	No	462/720	0.64	..
PA2084	PP1750	1055	2.7e-44	1	PA3459	No	Yes	No	823/1408	0.58	..
PA4594	PP4210	1045	1.6e-43	1	PA2390	No	No	No	463/707	0.65	..
PA1629	PP3284	1044	1.9e-43	1	PA3591	No	No	No	480/747	0.64	..
PA1248	PP2558	1040	1.7e-43	1	PA3404	No	No	No	774/1333	0.58	..
PA3420	PP0767	1037	1.1e-39	1	PA3921	No	No	No	1471/2620	0.56	..
PA2725	PP3095	1034	1.9e-40	1	PA0090	No	No	No	926/1570	0.58	..
PA1535	PP4064	1032	4.1e-43	1	PA2015	No	No	No	676/1149	0.58	..
PA2053	PP0100	1032	7.3e-43	1	PA0102	No	Yes	No	410/621	0.66	..
PA1316	PP4951	1031	4.1e-43	1	PA0458	No	No	No	629/1045	0.6	..
PA2055	PP1388	1031	4e-43	1	PA0246	No	No	No	763/1288	0.59	..
PA2425	PP3807	1031	8.1e-43	1	PA2411	No	No	No	465/715	0.65	..
PA1864	PP4295	1030	1.1e-42	1	PA1504	No	No	No	386/590	0.65	..
PA2591	PP3847	1028	1e-42	1	PA3599	No	No	No	494/796	0.62	..
PA3900	PP0351	1026	1e-42	1	PA0471	No	No	No	576/942	0.61	..
PA2923	PP4486	1022	1.9e-42	1	PA0888	No	Yes	No	474/745	0.63	..
PA1380	PP2425	1020	2e-42	1	PA2276	No	No	No	510/816	0.62	..
PA2092	PP2428	1018	1.8e-42	1	PA4113	No	No	No	720/1205	0.59	..
PA2925	PP4484	1016	4e-42	1	PA0890	No	Yes	No	426/664	0.64	..
PA3077	PP0901	1011	6.8e-42	1	PA4381	No	No	No	431/666	0.64	..
PA3486	PP4049	1006	2e-38	1	PA0262	No	No	No	812/1403	0.57	..
PA4203	PP4525	1006	8.8e-42	1	PA1413	No	No	No	470/734	0.64	..
PA3303	PP2367	1002	1e-41	1	PA4355	No	No	No	714/1206	0.59	..
PA1598	PP4699	1002	1.5e-41	1	PA4729	No	No	No	474/741	0.63	..
PA3514	PP0209	1000	1.7e-41	1	PA2294	No	No	No	496/803	0.61	..
PA0205	PP5178	1000	1.6e-41	1	PA0303	No	Yes	No	550/905	0.6	..
PA1901	PP1866	996	1.6e-41	1	PA2843	No	Yes	No	708/1179	0.6	..
PA4212	PP1866	996	1.6e-41	1	PA2843	No	Yes	No	708/1179	0.6	..
PA1365	PP2193	994	8.8e-38	1	PA4675	No	No	No	946/1646	0.57	..
PA3294	PP4049	993	4e-38	1	PA0262	No	No	No	807/1392	0.57	..
PA2121	PP3669	993	3.3e-41	1	PA2492	No	No	No	573/921	0.62	..
PA2676	PP1048	985	5.8e-41	1	PA3102	No	No	No	715/1217	0.58	..
PA1512	PP2615	983	1.7e-40	1	PA5267	No	No	No	351/520	0.67	..
PA1435	PP3585	982	7.3e-41	1	PA2528	No	No	No	564/926	0.6	..
PA1182	PP3753	982	8.7e-41	1	PA2556	No	No	No	628/1043	0.6	..
PA4444	PP4805	981	8.4e-50	2	PA4001	No	No	No	465/735	0.63	..
PA5382	PP1637	979	1.4e-40	1	PA3398	No	No	No	545/893	0.61	..
PA2431	PP1150	979	1.4e-37	1	PA3305	No	No	No	1131/1985	0.56	..
PA2933	PP2428	977	1.3e-40	1	PA4113	No	No	No	687/1168	0.58	..
PA1396	PP1695	975	1.5e-39	1	PA3271	No	No	No	951/1662	0.57	..
PA2683	PP3446	973	1.5e-40	1	PA1326	No	Yes	No	515/845	0.6	..
PA4165	PP5342	970	3.8e-53	2	PA5431	No	No	No	600/989	0.6	..
PA2158	PP0328	970	2.8e-40	1	PA5421	No	Yes	No	640/1055	0.6	..
PA1911	PP0351	963	7.2e-40	1	PA0471	No	No	No	567/912	0.62	..
PA2373	PP3106	962	7.3e-47	2	PA0095	No	No	No	486/778	0.62	..
PA1221	PP4243	962	1.9e-36	1	PA2424	No	No	No	788/1336	0.58	..
PA4596	PP2820	959	1.9e-39	1	PA4600	No	No	No	349/514	0.67	..
PA0399	PP4571	952	2.2e-39	1	PA2709	No	Yes	No	568/956	0.59	..
PA3592	PP3001	952	1.7e-39	1	PA3733	No	No	No	586/962	0.6	..
PA3701	PP0733	947	3.3e-39	1	PA4665	No	No	No	569/961	0.59	..
PA0295	PP2195	943	5e-39	1	PA0300	No	No	No	485/779	0.62	..
PA0361	PP4659	942	1.9e-37	1	PA1338	No	No	No	872/1557	0.56	..
PA4228	PP4063	936	1.3e-37	1	PA2557	No	No	No	968/1707	0.56	..
PA0040	PP1450	935	5.9e-37	1	PA2463	No	No	No	975/1732	0.56	..
PA4097	PP0552	929	2.2e-38	1	PA4153	No	Yes	No	461/736	0.62	..
PA1001	PP0417	928	1.8e-38	1	PA0609	No	Yes	No	788/1361	0.57	..
PA2533	PP0496	922	3.4e-38	1	PA2252	No	Yes	No	590/971	0.6	..
PA0847	PP1154	919	2.4e-34	1	PA2072	No	No	No	781/1331	0.58	..
PA0051	PP1750	917	3.3e-35	1	PA3459	No	Yes	No	823/1444	0.56	..
PA1322	PP0861	917	2.4e-34	1	PA4514	No	No	No	1003/1792	0.55	..
PA1201	PP2502	913	1.3e-37	1	PA1328	No	No	No	563/926	0.6	..
PA2940	PP3280	910	1.4e-37	1	PA0228	No	No	No	654/1097	0.59	..
PA4342	PP0613	909	1.3e-37	1	PA0202	No	No	No	617/1050	0.58	..
PA1416	PP5154	905	2.1e-37	1	PA0317	No	No	No	783/1363	0.57	..
PA3945	PP4763	905	5.3e-37	1	PA3944	No	No	No	361/538	0.67	..
PA5158	PP1384	902	2.7e-37	1	PA0427	No	No	No	830/1447	0.57	..
PA3860	PP4063	900	1.8e-34	1	PA2557	No	Yes	No	964/1695	0.56	..
PA4160	PP2417	897	6.4e-37	1	PA2914	No	Yes	No	607/1029	0.58	..
PA2558	PP3244	896	1e-36	1	PA4635	No	No	No	402/631	0.63	..
PA2727	PP5242	896	1.6e-32	1	PA2424	No	No	No	2068/3790	0.54	..
PA3728	PP4243	895	4e-32	1	PA2424	No	No	No	2943/5441	0.54	..
PA2547	PP1164	894	1e-36	1	PA0056	No	No	No	544/909	0.59	..
PA2818	PP3435	891	1.6e-35	1	PA3825	No	No	No	601/1014	0.59	..
PA1937	PP4419	890	4.4e-36	1	PA0979	No	No	No	238/310	0.76	..
PA1826	PP3179	883	3.1e-36	1	PA5029	No	No	No	483/788	0.61	..
PA2419	PP0711	882	5e-36	1	PA1202	No	No	No	372/588	0.63	..
PA0958	PP1206	880	4.8e-48	2	PA2113	No	No	No	366/557	0.65	..
PA3336	PP2367	879	3.6e-36	1	PA4355	No	No	No	679/1161	0.58	..
PA3447	PP3637	870	1.3e-35	1	PA2329	No	No	No	446/714	0.62	..
PA4628	PP0927	868	3.2e-51	2	PA3000	No	No	No	486/803	0.6	..
PA2316	PP3170	866	1.8e-35	1	PA2123	No	No	No	550/922	0.59	..
PA1399	PP2436	865	2e-35	1	PA2551	No	No	No	559/926	0.6	..
PA1188	PP1475	861	2.3e-35	1	PA3733	No	No	No	683/1170	0.58	..
PA0831	PP5339	854	5.4e-35	1	PA2704	No	No	No	582/985	0.59	..
PA3516	PP1379	854	4.2e-35	1	PA0230	No	Yes	No	754/1327	0.56	..
PA2534	PP2534	853	7.1e-35	1	PA3124	No	No	No	541/887	0.6	..
PA3993	PP0334	851	7.4e-35	1	PA0445	No	No	No	597/1018	0.58	..
PA3434	PP0334	851	7.4e-35	1	PA0445	No	No	No	597/1018	0.58	..
PA2319	PP0334	851	7.4e-35	1	PA0445	No	No	No	597/1018	0.58	..
PA2690	PP0334	851	7.4e-35	1	PA0445	No	No	No	597/1018	0.58	..
PA4797	PP0334	851	7.4e-35	1	PA0445	No	No	No	597/1018	0.58	..
PA3498	PP3737	851	8.3e-35	1	PA4905	No	No	No	521/844	0.61	..
PA2430	PP1266	850	1e-34	1	PA3892	No	No	No	440/707	0.62	..
PA2890	PP4066	848	1.3e-34	1	PA2013	No	No	No	444/724	0.61	..
PA0289	PP0595	846	1.4e-34	1	PA0133	No	No	No	516/867	0.59	..
PA2877	PP3170	844	1.8e-34	1	PA2123	No	No	No	542/905	0.59	..
PA4929	PP4670	841	1.5e-33	1	PA1120	No	No	No	751/1292	0.58	..
PA4148	PP1817	841	2.9e-34	1	PA1649	No	Yes	No	401/644	0.62	..
PA3593	PP4780	840	1.2e-31	1	PA3972	No	No	No	856/1488	0.57	..
PA1091	PP4243	838	1.5e-29	1	PA2424	No	No	No	2352/4319	0.54	..
PA0193	PP0230	836	4.5e-34	1	PA3935	No	No	No	490/817	0.59	..
PA2684	PP4243	835	1.4e-29	1	PA2424	No	No	No	2071/3779	0.54	..
PA2469	PP2832	834	4.9e-34	1	PA2206	No	No	No	540/897	0.6	..
PA2432	PP2502	832	6.1e-34	1	PA1328	No	No	No	538/899	0.59	..
PA1223	PP2046	831	6.8e-34	1	PA5189	No	No	No	487/813	0.59	..
PA3063	PP2024	830	1.4e-29	1	PA4282	No	No	No	1694/3061	0.55	..
PA2473	PP4619	830	1.1e-33	1	PA2007	No	Yes	No	418/655	0.63	..
PA3340	PP1993	829	3.4e-30	1	PA3115	No	No	No	1173/2099	0.55	..
PA3596	PP0706	827	9e-34	1	PA2118	No	No	No	619/1078	0.57	..
PA0083	PP3100	823	2.5e-33	1	PA2365	No	No	No	321/491	0.65	..
PA1425	PP0196	823	1e-30	1	PA5252	No	No	No	895/1571	0.56	..
PA5218	PP5071	822	1.8e-33	1	PA5029	No	No	No	514/843	0.6	..
PA4174	PP1853	819	2.3e-33	1	PA0181	No	No	No	579/966	0.59	..
PA4290	PP2111	817	7.7e-31	1	PA1561	No	No	No	591/1004	0.58	..
PA1690	PP4352	817	2.4e-33	1	PA1449	No	No	No	615/1052	0.58	..
PA0463	PP1181	817	3.9e-33	1	PA1157	No	No	No	419/683	0.61	..
PA0879	PP3725	816	2.6e-33	1	PA4979	No	Yes	No	544/900	0.6	..
PA5090	PP3386	816	1.7e-46	2	PA1511	No	No	No	456/756	0.6	..
PA0136	PP2759	815	6.5e-31	1	PA1947	No	Yes	No	869/1531	0.56	..
PA4489	PP4243	814	1.6e-28	1	PA2424	No	No	No	2545/4733	0.53	..
PA4581	PP0997	813	7.5e-31	1	PA2449	No	No	No	781/1347	0.57	..
PA2258	PP1164	797	2.4e-32	1	PA0056	No	No	No	545/922	0.59	..
PA1634	PP0586	791	1.8e-28	1	PA3920	No	Yes	No	963/1720	0.55	..
PA5114	PP2024	790	9.4e-28	1	PA4282	No	No	No	1472/2768	0.53	..
PA3594	PP3179	789	5.5e-32	1	PA5029	No	No	No	477/783	0.6	..
PA4895	PP3085	786	7e-32	1	PA0471	No	No	No	562/957	0.58	..
PA0185	PP0239	784	4.1e-31	1	PA3443	No	No	No	470/773	0.6	..
PA4201	PP1339	782	1.1e-31	1	PA4410	No	Yes	No	556/925	0.6	..
PA2513	PP3162	781	2.3e-31	1	PA2517	No	No	No	333/500	0.66	..
PA0123	PP1164	779	1.6e-31	1	PA0056	No	No	No	531/898	0.59	..
PA4959	PP0337	778	8.5e-28	1	PA5017	No	No	No	1166/2111	0.55	..
PA3927	PP2365	778	2e-31	1	PA1235	No	No	No	422/695	0.6	..
PA4593	PP4210	775	1e-30	1	PA2390	No	No	No	689/1217	0.56	..
PA2439	PP4053	775	1.1e-27	1	PA2162	No	No	No	1105/2022	0.54	..
PA2715	PP1625	772	9e-31	1	PA3621	No	No	No	244/332	0.73	..
PA3376	PP3220	772	7.6e-31	1	PA2061	No	Yes	No	450/734	0.61	..
PA1313	PP4951	766	1.8e-29	1	PA0458	No	No	No	752/1316	0.57	..
PA3135	PP5249	764	7.3e-31	1	PA2417	No	No	No	536/907	0.59	..
PA1490	PP1074	760	1.3e-30	1	PA3583	No	No	No	436/719	0.6	..
PA0436	PP4295	755	2.8e-30	1	PA1504	No	No	No	363/589	0.61	..
PA3948	PP2101	755	3.7e-47	2	PA0034	No	No	No	259/379	0.68	..
PA2447	PP3567	755	1.9e-30	1	PA0123	No	No	No	547/922	0.59	..
PA5518	PP5246	748	5.9e-27	1	PA1207	No	No	No	810/1433	0.56	..
PA1137	PP5210	740	8.3e-30	1	PA5234	No	No	No	554/982	0.56	..
PA0708	PP3152	740	9.3e-30	1	PA1413	No	No	No	458/757	0.6	..
PA5297	PP3365	737	1.6e-26	1	PA4180	No	Yes	No	907/1639	0.55	..
PA3535	PP2024	736	2.1e-25	1	PA4282	No	No	No	1678/3104	0.54	..
PA5307	PP4243	735	2.4e-25	1	PA2424	No	No	No	1437/2637	0.54	..
PA4188	PP2036	730	2.6e-29	1	PA0223	No	Yes	No	518/872	0.59	..
PA3947	PP2258	728	1.1e-28	1	PA0575	No	No	No	674/1177	0.57	..
PA3177	PP0563	727	3.3e-29	1	PA4843	No	No	No	537/905	0.59	..
PA1537	PP1745	725	4.8e-29	1	PA3277	No	No	No	475/781	0.6	..
PA2681	PP1164	724	4.8e-29	1	PA0056	No	No	No	534/905	0.59	..
PA0704	PP0931	721	1.8e-26	1	PA4483	No	No	No	791/1397	0.56	..
PA0180	PP2257	721	1.8e-28	1	PA1561	No	No	No	629/1070	0.58	..
PA2802	PP1727	720	9.1e-29	1	PA3249	No	No	No	440/732	0.6	..
PA3845	PP0698	720	7.1e-29	1	PA2930	No	No	No	528/894	0.59	..
PA2096	PP5339	717	8.3e-29	1	PA2704	No	No	No	589/1020	0.57	..
PA2212	PP0402	713	1.4e-28	1	PA0593	No	No	No	595/1030	0.57	..
PA1067	PP1164	712	1.7e-28	1	PA0056	No	No	No	476/803	0.59	..
PA3082	PP0765	707	9.8e-25	1	PA3923	No	Yes	No	1041/1921	0.54	..
PA1827	PP1914	704	4.6e-28	1	PA2967	No	Yes	No	440/736	0.59	..
PA4037	PP1722	704	3.5e-28	1	PA3254	No	No	No	546/937	0.58	..
PA4510	PP4576	701	6.8e-28	1	PA2111	No	No	No	417/685	0.6	..
PA1654	PP3544	701	9.7e-28	1	PA4132	No	No	No	657/1159	0.56	..
PA3326	PP2300	699	9e-28	1	PA1801	No	No	No	339/552	0.61	..
PA4089	PP1914	698	8.6e-28	1	PA2967	No	No	No	436/733	0.59	..
PA2361	PP4219	696	2.7e-23	1	PA2424	No	No	No	1978/3696	0.53	..
PA1312	PP1861	695	9.1e-28	1	PA2848	No	No	No	553/928	0.59	..
PA3491	PP2024	695	9.9e-24	1	PA4282	No	No	No	1251/2257	0.55	..
PA1184	PP4107	691	1.5e-27	1	PA4914	No	No	No	527/896	0.58	..
PA3448	PP0231	690	1.7e-27	1	PA3936	No	No	No	500/840	0.59	..
PA3610	PP5181	689	1.5e-27	1	PA0300	No	Yes	No	583/1015	0.57	..
PA3240	PP3403	689	1.8e-27	1	PA2418	No	No	No	471/775	0.6	..
PA1215	PP4063	686	9.5e-25	1	PA2557	No	Yes	No	634/1135	0.55	..
PA4509	PP2922	686	2.3e-27	1	PA0496	No	No	No	490/814	0.6	..
PA4088	PP4784	684	6.3e-25	1	PA3977	No	Yes	No	762/1329	0.57	..
PA0791	PP0583	684	3.5e-27	1	PA0163	No	No	No	442/732	0.6	..
PA0189	PP2754	684	1.3e-24	1	PA0162	No	No	No	762/1335	0.57	..
PA0291	PP2058	684	9.3e-40	2	PA2113	No	No	No	366/600	0.61	..
PA0176	PP1371	683	1.4e-23	1	PA4309	No	No	No	1051/1912	0.54	..
PA2369	PP2621	682	1e-23	1	PA1660	No	No	No	994/1790	0.55	..
PA5523	PP4784	680	8.9e-25	1	PA3977	No	Yes	No	760/1327	0.57	..
PA0784	PP0661	680	4.7e-27	1	PA0448	No	No	No	528/898	0.58	..
PA2841	PP4066	680	5.1e-27	1	PA2013	No	No	No	484/811	0.59	..
PA1893	PP3450	679	4.5e-23	1	PA0041	No	No	No	973/1736	0.56	..
PA3467	PP3165	679	1.5e-24	1	PA4900	No	No	No	715/1235	0.57	..
PA3025	PP1073	678	7.5e-24	1	PA3584	No	Yes	No	800/1419	0.56	..
PA1429	PP2645	672	1.3e-22	1	PA4825	No	No	No	1256/2298	0.54	..
PA3417	PP4401	671	8.9e-27	1	PA2247	No	Yes	No	413/709	0.58	..
PA4777	PP2714	670	7.2e-24	1	PA2480	No	No	No	566/959	0.59	..
PA3672	PP5207	669	1.1e-25	1	PA5231	No	No	No	547/951	0.57	..
PA4293	PP3552	669	5.6e-23	1	PA4197	No	No	No	755/1332	0.56	..
PA4822	PP0145	668	3.4e-23	1	PA5473	No	No	No	852/1510	0.56	..
PA3027	PP2004	666	1.7e-26	1	PA3094	No	No	No	580/1008	0.57	..
PA5324	PP5339	666	1.7e-26	1	PA2704	No	No	No	608/1035	0.58	..
PA0464	PP4158	665	4.6e-23	1	PA1636	No	No	No	807/1426	0.56	..
PA5412	PP4243	661	5.6e-22	1	PA2424	No	No	No	1385/2522	0.54	..
PA1262	PP4276	660	1e-22	1	PA1527	No	No	No	846/1497	0.56	..
PA0073	PP2317	658	6e-26	1	PA2857	No	No	No	378/614	0.61	..
PA3343	PP1494	658	4.1e-26	1	PA3702	No	No	No	316/515	0.61	..
PA2130	PP1889	657	5.5e-22	1	PA4084	No	No	No	485/798	0.6	..
PA0676	PP0351	657	4.7e-26	1	PA0471	No	No	No	555/942	0.58	..
PA3957	PP1745	654	7.7e-26	1	PA3277	No	No	No	440/747	0.58	..
PA3131	PP1024	653	9.7e-26	1	PA3181	No	Yes	No	391/655	0.59	..
PA0533	PP1983	652	2.8e-22	1	PA4601	No	No	No	870/1562	0.55	..
PA1229	PP2365	646	1.8e-25	1	PA1235	No	No	No	406/683	0.59	..
PA4332	PP4405	645	8.2e-25	1	PA0338	No	No	No	425/702	0.6	..
PA0173	PP4337	642	1.9e-25	1	PA1459	No	No	No	534/927	0.57	..
PA2370	PP4078	639	2.9e-25	1	PA1661	No	No	No	603/1038	0.58	..
PA1364	PP3555	639	2.9e-25	1	PA2388	No	No	No	479/834	0.57	..
PA2089	PP1626	638	4.4e-21	1	PA3620	No	No	No	1342/2446	0.54	..
PA3387	PP3547	638	4.4e-25	1	PA3128	No	Yes	No	452/754	0.59	..
PA3266	PP0985	636	8.1e-25	1	PA0456	No	No	No	164/210	0.78	..
PA0807	PP0130	636	5.1e-25	1	PA5485	No	No	No	422/705	0.59	..
PA4546	PP4695	634	2.3e-21	1	PA4725	No	No	No	900/1604	0.56	..
PA1257	PP5023	634	5.2e-25	1	PA5075	No	Yes	No	386/647	0.59	..
PA2448	PP5252	633	2.4e-21	1	PA2699	No	No	No	975/1770	0.55	..
PA2714	PP4124	633	6e-21	1	PA2642	No	No	No	1249/2265	0.55	..
PA1693	PP4355	632	8.1e-25	1	PA1446	No	No	No	206/292	0.7	..
PA1576	PP4666	632	6.9e-25	1	PA3569	No	No	No	416/691	0.6	..
PA2916	PP3405	632	9.7e-25	1	PA2306	No	No	No	370/598	0.61	..
PA2108	PP1157	630	2.6e-21	1	PA4180	No	No	No	704/1233	0.57	..
PA3774	PP5340	629	8e-25	1	PA1409	No	No	No	455/757	0.6	..
PA4194	PP1070	627	1.4e-24	1	PA1341	No	Yes	No	293/465	0.63	..
PA1022	PP4064	625	1.8e-22	1	PA2015	No	No	No	673/1184	0.56	..
PA2075	PP2024	625	7.8e-21	1	PA4282	No	No	No	905/1616	0.56	..
PA0169	PP1983	624	1.4e-23	1	PA4601	No	No	No	390/627	0.62	..
PA1599	PP0583	624	1.8e-24	1	PA0163	No	No	No	450/756	0.59	..
PA4231	PP4243	623	7.6e-21	1	PA2424	No	Yes	No	406/746	0.54	..
PA0840	PP2869	622	4e-22	1	PA4986	No	No	No	514/899	0.57	..
PA4129	PP2370	622	3.5e-24	1	PA1837	No	No	No	306/479	0.63	..
PA1883	PP4119	622	4.2e-24	1	PA2637	No	No	No	240/371	0.64	..
PA2090	PP3219	622	1.6e-24	1	PA2600	No	No	No	552/962	0.57	..
PA1903	PP1705	621	1.4e-20	1	PA1781	No	Yes	No	933/1692	0.55	..
PA4214	PP1705	621	1.4e-20	1	PA1781	No	Yes	No	933/1692	0.55	..
PA4897	PP1108	618	4.2e-20	1	PA1032	No	No	No	1368/2523	0.54	..
PA0813	PP1529	617	8.8e-22	1	PA3667	No	No	No	731/1255	0.58	..
PA1174	PP1703	616	5.1e-20	1	PA1779	No	Yes	No	912/1670	0.54	..
PA1147	PP1905	616	1.4e-20	1	PA2976	No	No	No	782/1388	0.56	..
PA2220	PP2502	614	4.3e-24	1	PA1328	No	No	No	528/913	0.57	..
PA0864	PP4852	613	5.6e-24	1	PA4288	No	No	No	441/755	0.58	..
PA0198	PP1219	613	6.3e-24	1	PA0969	No	No	No	385/638	0.6	..
PA1851	PP3242	612	3.5e-21	1	PA3702	No	No	No	364/600	0.6	..
PA1254	PP2036	612	5.5e-24	1	PA0223	No	Yes	No	506/867	0.58	..
PA4896	PP3086	611	1.1e-23	1	PA1912	No	No	No	267/421	0.63	..
PA2882	PP2945	611	5.7e-36	2	PA2571	No	No	No	401/688	0.58	..
PA0416	PP2383	611	6.4e-24	1	PA3269	No	No	No	387/640	0.6	..
PA1379	PP2503	610	8.2e-24	1	PA4089	No	No	No	390/650	0.6	..
PA1224	PP3720	609	9.4e-24	1	PA4975	No	No	No	417/702	0.59	..
PA2729	PP2024	609	2.1e-20	1	PA4282	No	No	No	715/1233	0.57	..
PA2093	PP4611	608	1.4e-23	1	PA3899	No	No	No	290/463	0.62	..
PA0192	PP1993	607	1e-19	1	PA3115	No	No	No	361/645	0.55	..
PA3170	PP2584	606	9.7e-21	1	PA0142	No	No	No	482/834	0.57	..
PA1128	PP2952	605	1.1e-23	1	PA3565	No	No	No	543/937	0.57	..
PA4032	PP3454	604	1.3e-23	1	PA1157	No	No	No	414/701	0.59	..
PA1759	PP0767	602	2.1e-19	1	PA3921	No	No	No	1500/2779	0.53	..
PA0172	PP4124	601	1.4e-19	1	PA2642	No	No	No	971/1721	0.56	..
PA3384	PP0825	601	1.9e-23	1	PA3314	No	Yes	No	385/641	0.6	..
PA3394	PP5207	598	2e-22	1	PA5231	No	No	No	502/866	0.57	..
PA4927	PP4947	598	3.4e-19	1	PA0782	No	No	No	1246/2270	0.54	..
PA3358	PP4568	597	2.6e-23	1	PA2712	No	No	No	473/801	0.59	..
PA4098	PP2002	595	3.7e-23	1	PA3106	No	Yes	No	427/716	0.59	..
PA4145	PP2534	593	3.9e-23	1	PA3124	No	No	No	499/847	0.58	..
PA1920	PP2024	593	3.8e-19	1	PA4282	No	Yes	No	1137/2065	0.55	..
PA5508	PP4547	589	6.3e-20	1	PA1566	No	Yes	No	569/992	0.57	..
PA1922	PP3450	589	4.4e-19	1	PA0041	No	No	No	1087/1988	0.54	..
PA1109	PP4852	589	6.8e-23	1	PA4288	No	No	No	457/770	0.59	..
PA2628	PP3670	588	6.8e-23	1	PA0239	No	No	No	464/789	0.58	..
PA0641	PP4243	588	2.1e-18	1	PA2424	No	No	No	1816/3369	0.53	..
PA5541	PP4999	588	5.6e-20	1	PA0401	No	No	No	726/1296	0.56	..
PA3609	PP1482	587	8.2e-23	1	PA0324	No	Yes	No	331/544	0.6	..
PA4486	PP1381	585	2.1e-22	1	PA0232	No	Yes	No	245/378	0.64	..
PA2069	PP4261	585	5.4e-19	1	PA1549	No	No	No	935/1677	0.55	..
PA5032	PP4508	584	3.8e-21	1	PA3215	No	No	No	456/769	0.59	..
PA1232	PP2028	582	7.1e-19	1	PA3074	No	No	No	890/1599	0.55	..
PA0194	PP0169	582	1.2e-22	1	PA2310	No	No	No	502/876	0.57	..
PA0391	PP4243	582	1.5e-18	1	PA2424	No	No	No	1074/1962	0.54	..
PA3553	PP0034	582	1.1e-22	1	PA4819	No	No	No	448/780	0.57	..
PA5219	PP5072	581	7.3e-20	1	PA5030	No	No	No	623/1084	0.57	..
PA0693	PP1219	578	3.1e-21	1	PA0969	No	No	No	398/661	0.6	..
PA0525	PP2024	578	1.5e-18	1	PA4282	No	No	No	982/1774	0.55	..
PA3375	PP4210	573	2.1e-21	1	PA2390	No	Yes	No	363/597	0.6	..
PA4219	PP3734	573	4.9e-19	1	PA0041	No	No	No	635/1092	0.58	..
PA0745	PP2217	573	3.7e-22	1	PA3591	No	No	No	441/768	0.57	..
PA3795	PP1314	573	2.7e-22	1	PA4434	No	No	No	517/894	0.57	..
PA3365	PP3095	572	3.7e-19	1	PA0090	No	No	No	620/1090	0.56	..
PA3554	PP0067	571	5.6e-21	1	PA0018	No	No	No	441/758	0.58	..
PA4218	PP1355	568	6.8e-19	1	PA4393	No	No	No	678/1199	0.56	..
PA0214	PP1913	567	5.6e-22	1	PA2968	No	No	No	451/768	0.58	..
PA2921	PP2539	566	6.3e-22	1	PA2206	No	No	No	542/958	0.56	..
PA2241	PP0804	564	2.6e-18	1	PA1876	No	No	No	802/1452	0.55	..
PA2068	PP1831	564	3.1e-19	1	PA1682	No	No	No	608/1041	0.58	..
PA1762	PP2855	564	1.1e-21	1	PA1953	No	No	No	314/513	0.61	..
PA2881	PP2942	563	3.5e-21	1	PA2572	No	No	No	287/466	0.61	..
PA1266	PP3450	562	2.2e-18	1	PA0041	No	No	No	742/1298	0.57	..
PA2094	PP0703	561	1e-21	1	PA0471	No	No	No	551/972	0.56	..
PA0739	PP3560	560	1.3e-21	1	PA1309	No	No	No	466/808	0.57	..
PA2587	PP3199	560	4e-19	1	PA3328	No	Yes	No	586/1030	0.56	..
PA1386	PP1779	560	1e-18	1	PA5450	No	No	No	304/514	0.59	..
PA2135	PP2028	559	3.2e-18	1	PA3074	No	No	No	789/1418	0.55	..
PA4925	PP1353	558	1.6e-21	1	PA4394	No	No	No	412/711	0.57	..
PA0809	PP4158	558	4.5e-18	1	PA1636	No	No	No	750/1332	0.56	..
PA4166	PP5344	558	3e-21	1	PA5432	No	No	No	272/438	0.62	..
PA2589	PP3751	557	1.1e-18	1	PA2500	No	No	No	709/1243	0.57	..
PA3878	PP4053	556	1.5e-17	1	PA2162	No	No	No	1034/1895	0.54	..
PA1282	PP3377	555	3.8e-18	1	PA2262	No	No	No	647/1155	0.56	..
PA3391	PP4261	555	2.1e-17	1	PA1549	No	No	No	959/1737	0.55	..
PA3511	PP1914	555	2.5e-21	1	PA2967	No	No	No	423/741	0.57	..
PA2057	PP2561	554	4.4e-17	1	PA2424	No	No	No	1370/2536	0.54	..
PA3506	PP3365	554	9.2e-18	1	PA4180	No	No	No	932/1711	0.54	..
PA0811	PP2092	552	2.5e-18	1	PA1783	No	No	No	690/1227	0.56	..
PA4358	PP3095	552	3.2e-17	1	PA0090	No	No	No	955/1724	0.55	..
PA1941	PP5242	551	3.2e-17	1	PA2424	No	No	No	1095/1963	0.55	..
PA2887	PP3926	551	3.6e-21	1	PA1828	No	No	No	447/775	0.57	..
PA0078	PP4124	548	1.5e-17	1	PA2642	No	No	No	688/1225	0.56	..
PA0479	PP2054	547	4.7e-21	1	PA1998	No	No	No	521/917	0.56	..
PA2453	PP2121	546	2.1e-20	1	PA3031	No	No	No	158/216	0.73	..
PA3613	PP1626	546	6.5e-17	1	PA3620	No	No	No	860/1557	0.55	..
PA3909	PP2080	545	8.9e-17	1	PA3068	No	No	No	747/1330	0.56	..
PA5548	PP2367	544	4.7e-18	1	PA4355	No	No	No	692/1223	0.56	..
PA1907	PP4999	543	1.8e-17	1	PA0401	No	No	No	645/1140	0.56	..
PA1494	PP1037	542	5.8e-17	1	PA3763	No	No	No	836/1516	0.55	..
PA0081	PP2801	541	2.3e-17	1	PA0265	No	No	No	709/1277	0.55	..
PA3165	PP0967	541	2.1e-18	1	PA4447	No	Yes	No	475/827	0.57	..
PA5441	PP4052	541	8.2e-17	1	PA2163	No	No	No	1089/1964	0.55	..
PA0333	PP1897	540	2.6e-17	1	PA2984	No	No	No	668/1161	0.57	..
PA2070	PP0525	540	1.2e-16	1	PA1271	No	No	No	992/1791	0.55	..
PA3879	PP4099	539	1.5e-20	1	PA2586	No	No	No	369/634	0.58	..
PA0220	PP2802	538	2.4e-17	1	PA3597	No	No	No	738/1289	0.57	..
PA4156	PP4613	537	1.2e-16	1	PA3901	No	Yes	No	1137/2085	0.54	..
PA0334	PP3740	536	1.9e-17	1	PA4903	No	No	No	690/1231	0.56	..
PA2343	PP5133	536	3.8e-17	1	PA0345	No	Yes	No	690/1210	0.57	..
PA3324	PP1817	536	2.2e-19	1	PA1649	No	No	No	428/748	0.57	..
PA2539	PP1202	535	5.6e-17	1	PA0920	No	No	No	785/1388	0.56	..
PA3910	PP4772	534	9.9e-17	1	PA3961	No	No	No	878/1596	0.55	..
PA3330	PP0429	534	2.1e-20	1	PA0658	No	No	No	456/789	0.57	..
PA0204	PP5177	532	2.2e-20	1	PA0304	No	Yes	No	364/623	0.58	..
PA2340	PP1017	532	2.4e-20	1	PA3188	No	Yes	No	494/860	0.57	..
PA0477	PP3669	531	2.5e-20	1	PA2492	No	No	No	515/921	0.55	..
PA2535	PP3174	531	2.2e-18	1	PA1739	No	No	No	253/390	0.64	..
PA4816	PP3095	529	8.6e-17	1	PA0090	No	No	No	695/1244	0.55	..
PA4320	PP3724	528	1.7e-16	1	PA4978	No	No	No	916/1659	0.55	..
PA4781	PP5320	528	1.7e-19	1	PA5360	No	No	No	388/654	0.59	..
PA4162	PP1914	528	4.1e-20	1	PA2967	No	Yes	No	374/639	0.58	..
PA2531	PP1676	526	9.8e-18	1	PA1276	No	Yes	No	546/956	0.57	..
PA3054	PP5222	526	3.8e-16	1	PA5272	No	No	No	1082/1976	0.54	..
PA2074	PP0382	526	4.7e-20	1	PA3598	No	No	No	356/587	0.6	..
PA1302	PP1750	526	4.6e-16	1	PA3459	No	No	No	970/1778	0.54	..
PA2236	PP0672	525	1.3e-16	1	PA4601	No	No	No	633/1122	0.56	..
PA1068	PP4243	525	5.8e-16	1	PA2424	No	No	No	981/1806	0.54	..
PA1214	PP4211	525	1.5e-16	1	PA2391	No	No	No	759/1350	0.56	..
PA3408	PP5242	522	1.2e-15	1	PA2424	No	No	No	1074/1974	0.54	..
PA1131	PP4695	522	2.2e-16	1	PA4725	No	No	No	624/1095	0.56	..
PA3556	PP0988	520	5.4e-16	1	PA2445	No	No	No	962/1736	0.55	..
PA3729	PP4276	519	1e-15	1	PA1527	No	No	No	939/1689	0.55	..
PA5065	PP2024	519	6.2e-16	1	PA4282	No	Yes	No	925/1662	0.55	..
PA1185	PP4104	518	1.2e-19	1	PA1033	No	No	No	236/376	0.62	..
PA2603	PP4947	518	6.9e-16	1	PA0782	No	No	No	814/1453	0.56	..
PA0233	PP2054	518	9.6e-20	1	PA1998	No	No	No	468/829	0.56	..
PA2438	PP4891	517	2.1e-19	1	PA4941	No	No	No	513/896	0.57	..
PA2078	PP2932	517	6.7e-16	1	PA4163	No	No	No	811/1442	0.56	..
PA1264	PP1863	517	1.1e-19	1	PA2846	No	No	No	443/767	0.57	..
PA0164	PP0572	517	6.4e-16	1	PA1973	No	No	No	850/1546	0.54	..
PA3875	PP1325	516	2.4e-15	1	PA4423	No	Yes	No	1064/1911	0.55	..
PA3980	PP1197	516	2.6e-16	1	PA0916	No	No	No	610/1062	0.57	..
PA0306	PP3753	514	5.8e-17	1	PA2556	No	No	No	558/989	0.56	..
PA0572	PP3095	511	3.4e-15	1	PA0090	No	No	No	957/1718	0.55	..
PA4096	PP2092	511	2.9e-16	1	PA1783	No	No	No	551/956	0.57	..
PA4289	PP1905	510	7e-16	1	PA2976	No	No	No	686/1227	0.55	..
PA2783	PP3450	509	1.9e-15	1	PA0041	No	No	No	951/1729	0.55	..
PA2335	PP4838	509	2.8e-15	1	PA3790	No	No	No	1087/2011	0.54	..
PA3778	PP2919	508	8.2e-18	1	PA0491	No	No	No	508/890	0.57	..
PA3838	PP0225	508	3.2e-19	1	PA5074	No	No	No	394/665	0.59	..
PA1258	PP0656	507	3.3e-19	1	PA2202	No	Yes	No	381/648	0.58	..
PA1017	PP4243	507	4.8e-15	1	PA2424	No	No	No	1105/2019	0.54	..
PA2178	PP1640	507	4.5e-19	1	PA1190	No	No	No	343/585	0.58	..
PA2497	PP3534	506	3.4e-19	1	PA1141	No	No	No	482/835	0.57	..
PA1327	PP4220	506	4.4e-15	1	PA2402	No	No	No	1052/1915	0.54	..
PA4812	PP2185	505	5.5e-15	1	PA1779	No	Yes	No	595/1067	0.55	..
PA2893	PP4219	505	4.4e-15	1	PA2424	No	No	No	1001/1832	0.54	..
PA1738	PP4660	503	7.4e-18	1	PA1859	No	No	No	483/826	0.58	..
PA3487	PP1703	502	1.3e-14	1	PA1779	No	No	No	1492/2735	0.54	..
PA4323	PP4261	502	2.1e-15	1	PA1549	No	No	No	770/1361	0.56	..
PA3877	PP2092	502	8.6e-16	1	PA1783	No	Yes	No	626/1115	0.56	..
PA3105	PP1046	501	1.9e-30	2	PA0685	No	No	No	695/1242	0.55	..
PA1069	PP2636	501	6.7e-15	1	PA4807	No	No	No	869/1572	0.55	..
PA2886	PP4276	501	5.3e-15	1	PA1527	No	No	No	560/1029	0.54	..
PA3426	PP3726	500	7e-19	1	PA4980	No	No	No	438/751	0.58	..
PA2502	PP5133	499	2.3e-15	1	PA0345	No	No	No	741/1307	0.56	..
PA1021	PP3726	499	7.8e-19	1	PA4980	No	No	No	301/497	0.6	..
PA2195	PP0323	499	1.1e-15	1	PA5416	No	Yes	No	545/974	0.55	..
PA3409	PP0351	496	1.7e-16	1	PA0471	No	No	No	486/839	0.57	..
PA1917	PP0874	496	2.5e-18	1	PA3425	No	No	No	220/344	0.63	..
PA3357	PP0988	496	4.4e-15	1	PA2445	No	Yes	No	712/1271	0.56	..
PA0851	PP5149	496	5.7e-16	1	PA0331	No	No	No	478/854	0.55	..
PA0191	PP3716	495	1.3e-17	1	PA2510	No	No	No	523/912	0.57	..
PA5235	PP3176	494	2.7e-15	1	PA4126	No	Yes	No	730/1327	0.55	..
PA4995	PP4124	494	4.7e-15	1	PA2642	No	No	No	726/1306	0.55	..
PA2091	PP2092	493	2.3e-15	1	PA1783	No	No	No	663/1181	0.56	..
PA4787	PP2004	493	4.6e-16	1	PA3094	No	No	No	581/1022	0.56	..
PA3943	PP3355	492	4.1e-15	1	PA3589	No	No	No	654/1161	0.56	..
PA0323	PP5181	492	7.4e-26	2	PA0300	No	Yes	No	236/375	0.62	..
PA0043	PP1819	491	6.4e-15	1	PA1646	No	No	No	663/1198	0.55	..
PA5471	PP2146	490	4e-15	1	PA0799	No	No	No	630/1106	0.56	..
PA1108	PP2755	490	2.3e-15	1	PA2325	No	No	No	666/1181	0.56	..
PA4901	PP0767	490	1.2e-14	1	PA3921	No	Yes	No	898/1622	0.55	..
PA0072	PP1145	489	6.6e-15	1	PA3308	No	No	No	655/1176	0.55	..
PA4621	PP2080	488	4.9e-14	1	PA3068	No	No	No	1416/2650	0.53	..
PA2289	PP1905	488	2.8e-14	1	PA2976	No	No	No	1176/2176	0.54	..
PA4889	PP4158	488	5.1e-15	1	PA1636	No	No	No	642/1123	0.57	..
PA5506	PP5032	487	1.9e-16	1	PA5098	No	No	No	511/887	0.57	..
PA3415	PP0338	486	4.8e-15	1	PA5016	No	No	No	314/522	0.6	..
PA3631	PP2024	486	1.1e-14	1	PA4282	No	No	No	218/379	0.57	..
PA3064	PP1145	485	5.7e-14	1	PA3308	No	No	No	1091/2017	0.54	..
PA2363	PP1048	485	5.9e-15	1	PA3102	No	No	No	619/1078	0.57	..
PA4488	PP2184	485	1.5e-14	1	PA2641	No	No	No	727/1321	0.55	..
PA4144	PP4923	484	1.1e-14	1	PA4974	No	No	No	754/1358	0.55	..
PA0996	PP4243	484	3e-14	1	PA2424	No	Yes	No	810/1445	0.56	..
PA2383	PP4107	483	2.7e-16	1	PA4914	No	No	No	439/771	0.56	..
PA2044	PP2148	483	3.9e-14	1	PA3002	No	No	No	827/1503	0.55	..
PA5174	PP1325	483	2.9e-14	1	PA4423	No	Yes	No	1013/1851	0.54	..
PA4491	PP1492	483	2.9e-14	1	PA3704	No	No	No	759/1371	0.55	..
PA1617	PP4243	483	3.8e-14	1	PA2424	No	Yes	No	591/1056	0.55	..
PA2540	PP1108	481	3.7e-14	1	PA1032	No	No	No	897/1616	0.55	..
PA3926	PP5251	480	1.1e-14	1	PA2701	No	No	No	596/1059	0.56	..
PA3670	PP4243	480	6.4e-14	1	PA2424	No	No	No	906/1668	0.54	..
PA4304	PP3478	480	1.6e-14	1	PA1868	No	No	No	328/549	0.59	..
PA2256	PP3450	479	3.3e-14	1	PA0041	No	No	No	775/1396	0.55	..
PA2050	PP3086	479	9.8e-18	1	PA1912	No	No	No	289/478	0.6	..
PA2124	PP0056	478	1.2e-16	2	PA3710	No	Yes	No	420/731	0.57	..
PA2949	PP3645	478	5.6e-16	1	PA0231	No	No	No	516/884	0.58	..
PA3366	PP0382	478	2.2e-17	1	PA3598	No	Yes	No	420/728	0.57	..
PA1019	PP2548	477	1.8e-14	1	PA1144	No	Yes	No	731/1323	0.55	..
PA1451	PP3734	477	3.2e-14	1	PA0041	No	No	No	797/1410	0.56	..
PA0863	PP0072	475	2.4e-15	1	PA0023	No	No	No	455/785	0.57	..
PA3773	PP4108	475	1.3e-14	1	PA0266	No	No	No	673/1187	0.56	..
PA1488	PP4261	474	3.6e-14	1	PA1549	No	No	No	726/1287	0.56	..
PA1127	PP4932	474	2.6e-17	1	PA4992	No	No	No	424/717	0.59	..
PA1344	PP2794	474	1.1e-17	1	PA1470	No	No	No	328/549	0.59	..
PA2873	PP4328	473	7.9e-14	1	PA1474	No	No	No	869/1558	0.55	..
PA1267	PP0586	473	2.7e-14	1	PA3920	No	Yes	No	617/1084	0.56	..
PA1848	PP1202	472	3.8e-14	1	PA0920	No	No	No	672/1190	0.56	..
PA3078	PP1893	470	6.1e-14	1	PA2815	No	No	No	746/1339	0.55	..
PA3995	PP2210	470	8.6e-16	1	PA1309	No	No	No	514/895	0.57	..
PA0082	PP3201	469	1.1e-14	1	PA3080	No	No	No	535/938	0.57	..
PA2203	PP5023	469	3.3e-17	1	PA5075	No	No	No	349/599	0.58	..
PA3475	PP5024	469	1.8e-17	1	PA5076	No	No	No	421/740	0.56	..
PA2503	PP3095	469	6.5e-14	1	PA0090	No	No	No	695/1250	0.55	..
PA0208	PP4276	469	1.4e-13	1	PA1527	No	Yes	No	716/1307	0.54	..
PA1020	PP5242	469	5.3e-14	1	PA2424	No	No	No	613/1091	0.56	..
PA3319	PP1325	469	1.5e-13	1	PA4423	No	No	No	937/1718	0.54	..
PA3329	PP2818	468	9e-14	1	PA4598	No	No	No	688/1260	0.54	..
PA0816	PP0661	468	1.4e-15	1	PA0448	No	No	No	470/840	0.55	..
PA4303	PP2024	467	7.6e-14	1	PA4282	No	No	No	659/1159	0.56	..
PA4592	PP4243	466	1.8e-13	1	PA2424	No	No	No	796/1439	0.55	..
PA1977	PP2316	465	1.2e-14	1	PA2858	No	No	No	485/837	0.57	..
PA2035	PP0793	465	2e-13	1	PA3562	No	No	No	777/1425	0.54	..
PA0039	PP0090	465	7.2e-17	1	PA0060	No	No	No	145/198	0.73	..
PA2131	PP2638	465	1.4e-13	1	PA4225	No	No	No	785/1410	0.55	..
PA2437	PP5227	465	2.7e-14	1	PA5277	No	No	No	427/735	0.58	..
PA0748	PP4605	464	3.4e-15	1	PA3898	No	No	No	466/826	0.56	..
PA5350	PP5315	464	1.4e-16	1	PA5351	No	No	No	124/163	0.76	..
PA0207	PP0698	463	4.5e-15	1	PA2930	No	No	No	505/890	0.56	..
PA1822	PP1626	463	2.4e-13	1	PA3620	No	No	No	837/1529	0.54	..
PA4157	PP4622	463	3.1e-17	1	PA2010	No	No	No	445/785	0.56	..
PA2286	PP3750	462	1.4e-13	1	PA0268	No	No	No	746/1341	0.55	..
PA3761	PP4243	461	4.2e-13	1	PA2424	No	No	No	957/1774	0.53	..
PA5149	PP2819	461	6e-14	1	PA4597	No	No	No	631/1114	0.56	..
PA3509	PP3645	460	3.6e-15	1	PA0231	No	No	No	516/899	0.57	..
PA3060	PP4235	460	5.6e-14	1	PA2478	No	No	No	548/965	0.56	..
PA2076	PP2696	459	9.3e-15	1	PA3587	No	No	No	435/753	0.57	..
PA2745	PP0572	459	2.7e-14	1	PA1973	No	No	No	485/846	0.57	..
PA2416	PP1325	458	3.2e-13	1	PA4423	No	Yes	No	662/1186	0.55	..
PA1330	PP2794	457	6.4e-17	1	PA1470	No	No	No	403/701	0.57	..
PA4008	PP3726	457	8e-16	1	PA4980	No	No	No	393/677	0.58	..
PA1346	PP2024	457	4.4e-13	1	PA4282	No	No	No	681/1199	0.56	..
PA4612	PP1834	456	1e-16	1	PA3287	No	No	No	288/483	0.59	..
PA4138	PP5258	456	1.7e-13	1	PA1027	No	Yes	No	500/891	0.56	..
PA5341	PP2024	454	7.9e-16	1	PA4282	No	No	No	252/445	0.56	..
PA2434	PP0351	454	1.8e-16	1	PA0471	No	No	No	348/569	0.61	..
PA0071	PP4243	454	8.8e-13	1	PA2424	No	No	No	864/1568	0.55	..
PA3934	PP0180	454	7.4e-13	1	PA5248	No	No	No	1106/2015	0.54	..
PA3848	PP4784	453	2.5e-13	1	PA3977	No	No	No	669/1188	0.56	..
PA1220	PP1325	453	3e-13	1	PA4423	No	No	No	683/1203	0.56	..
PA0829	PP3645	453	1.9e-14	1	PA0231	No	No	No	461/813	0.56	..
PA0195	PP2024	453	2.9e-13	1	PA4282	No	Yes	No	547/963	0.56	..
PA3507	PP1745	452	5.6e-16	1	PA3277	No	No	No	390/670	0.58	..
PA2333	PP0077	451	5.6e-13	1	PA0031	No	No	No	297/491	0.6	..
PA4072	PP0569	451	4.1e-13	1	PA4821	No	No	No	667/1181	0.56	..
PA4321	PP4328	450	3.8e-13	1	PA1474	No	No	No	522/930	0.56	..
PA0328	PP1819	450	1.1e-12	1	PA1646	No	No	No	910/1650	0.55	..
PA4224	PP0340	449	3.4e-13	1	PA5014	No	No	No	589/1048	0.56	..
PA2268	PP4219	449	4.6e-13	1	PA2424	No	No	No	603/1075	0.56	..
PA0696	PP4613	449	1e-12	1	PA3901	No	No	No	849/1522	0.55	..
PA0349	PP2759	448	2.5e-13	1	PA1947	No	No	No	520/923	0.56	..
PA3679	PP2638	448	7.4e-13	1	PA4225	No	No	No	678/1208	0.56	..
PA0272	PP2436	447	5.4e-14	1	PA2551	No	No	No	523/912	0.57	..
PA1265	PP4767	447	4.2e-14	1	PA4783	No	No	No	545/942	0.57	..
PA0519	PP1037	447	1.6e-12	1	PA3763	No	Yes	No	821/1512	0.54	..
PA5089	PP4276	447	2.4e-12	1	PA1527	No	No	No	1119/2040	0.54	..
PA3471	PP1876	446	5.6e-13	1	PA2823	No	Yes	No	476/835	0.57	..
PA2240	PP1710	445	7.3e-13	1	PA2210	No	No	No	725/1295	0.55	..
PA1148	PP4243	445	2.8e-12	1	PA2424	No	No	No	993/1826	0.54	..
PA2098	PP3751	444	1.6e-13	1	PA2500	No	No	No	492/852	0.57	..
PA0203	PP2195	444	2.2e-13	1	PA0300	No	Yes	No	556/984	0.56	..
PA0524	PP4255	444	8.4e-13	1	PA1554	No	Yes	No	748/1374	0.54	..
PA0101	PP0988	443	1.1e-12	1	PA2445	No	No	No	665/1180	0.56	..
PA4779	PP1285	443	1.9e-13	1	PA3543	No	No	No	505/901	0.56	..
PA0217	PP1063	442	9.4e-14	1	PA3587	No	No	No	446/785	0.56	..
PA0137	PP5139	442	7.7e-13	1	PA3690	No	Yes	No	640/1136	0.56	..
PA0109	PP0107	442	8.3e-16	1	PA0110	No	No	No	140/200	0.7	..
PA1915	PP3095	441	2.2e-12	1	PA0090	No	No	No	767/1389	0.55	..
PA0924	PP0096	441	2.9e-12	1	PA0067	No	No	No	909/1671	0.54	..
PA4849	PP1202	441	2.8e-13	1	PA0920	No	No	No	515/894	0.57	..
PA3024	PP4772	440	2.4e-12	1	PA3961	No	Yes	No	770/1390	0.55	..
PA0836	PP1736	440	6.1e-13	1	PA3241	No	Yes	No	572/1009	0.56	..
PA0138	PP0337	439	5.7e-13	1	PA5017	No	Yes	No	519/914	0.56	..
PA4507	PP0198	439	5e-16	1	PA5249	No	No	No	333/548	0.6	..
PA2043	PP0774	438	4.9e-13	1	PA0835	No	No	No	528/942	0.56	..
PA3427	PP2503	438	1.1e-15	1	PA4089	No	No	No	328/555	0.59	..
PA1818	PP0562	438	4.9e-12	1	PA4844	No	Yes	No	958/1797	0.53	..
PA5455	PP1520	438	3.2e-12	1	PA3673	No	No	No	818/1467	0.55	..
PA3505	PP3201	437	7.8e-14	1	PA3080	No	No	No	449/772	0.58	..
PA2204	PP0282	437	5.2e-16	1	PA5153	No	No	No	409/739	0.55	..
PA2458	PP4085	436	2e-12	1	PA2684	No	No	No	492/902	0.54	..
PA1819	PP4840	436	1.8e-12	1	PA5097	No	Yes	No	736/1349	0.54	..
PA5113	PP3546	436	2.7e-12	1	PA2177	No	No	No	355/639	0.55	..
PA0683	PP3753	436	7.8e-13	1	PA2556	No	No	No	546/974	0.56	..
PA0418	PP3450	435	3.3e-12	1	PA0041	No	No	No	783/1407	0.55	..
PA3718	PP1905	434	3e-12	1	PA2976	No	No	No	644/1150	0.56	..
PA3091	PP3075	434	2.7e-12	1	PA2005	No	No	No	588/1048	0.56	..
PA3096	PP5133	434	1.5e-12	1	PA0345	No	No	No	554/961	0.57	..
PA3478	PP4882	433	2.5e-12	1	PA4688	No	Yes	No	453/776	0.58	..
PA0064	PP4220	432	2.1e-12	1	PA2402	No	No	No	514/894	0.57	..
PA3759	PP5409	431	1.8e-12	1	PA5549	No	No	No	383/658	0.58	..
PA2590	PP3095	430	1.7e-11	1	PA0090	No	No	No	1470/2771	0.53	..
PA4302	PP3483	430	3.7e-12	1	PA3103	No	No	No	584/1043	0.55	..
PA3296	PP1402	429	5.4e-12	1	PA5512	No	Yes	#N/A	643/1131	0.56	..
PA4159	PP1829	429	5e-13	1	PA1680	No	Yes	No	463/810	0.57	..
PA4187	PP1376	429	3.6e-12	1	PA0235	No	No	No	729/1299	0.56	..
PA3331	PP3095	428	5.6e-12	1	PA0090	No	No	No	676/1213	0.55	..
PA1483	PP0338	428	4e-12	1	PA5016	No	No	No	502/874	0.57	..
PA0780	PP4605	428	2.5e-14	1	PA3898	No	No	No	428/757	0.56	..
PA0468	PP3486	428	1.8e-12	1	PA4226	No	No	No	572/1009	0.56	..
PA1695	PP1103	427	4.3e-12	1	PA3272	No	No	No	615/1085	0.56	..
PA5282	PP1182	426	4.3e-12	1	PA1158	No	No	No	532/933	0.57	..
PA0186	PP3229	426	1.4e-12	1	PA2594	No	No	No	466/822	0.56	..
PA3061	PP1673	426	5e-12	1	PA1273	No	No	No	544/954	0.57	..
PA2283	PP2316	426	9.4e-12	1	PA2858	No	No	No	726/1299	0.55	..
PA3026	PP1703	425	1.5e-11	1	PA1779	No	No	No	869/1579	0.55	..
PA3290	PP4772	425	2.8e-11	1	PA3961	No	No	No	708/1311	0.54	..
PA4142	PP1626	425	7.7e-12	1	PA3620	No	No	No	723/1288	0.56	..
PA4334	PP2800	425	4.4e-12	1	PA2413	No	No	No	551/982	0.56	..
PA1716	PP1046	423	1.6e-11	1	PA0685	No	No	No	921/1704	0.54	..
PA5521	PP2784	423	2.6e-14	1	PA2003	No	No	No	443/780	0.56	..
PA2235	PP1626	423	2.3e-11	1	PA3620	No	No	No	667/1197	0.55	..
PA1356	PP1037	423	7.7e-12	1	PA3763	No	No	No	641/1158	0.55	..
PA0699	PP2024	422	4.8e-12	1	PA4282	No	No	No	544/949	0.57	..
PA1797	PP1626	422	2.2e-11	1	PA3620	No	No	No	882/1609	0.54	..
PA3374	PP1037	422	9.9e-12	1	PA3763	No	No	No	664/1189	0.55	..
PA3457	PP2024	421	5.8e-13	1	PA4282	No	No	No	403/754	0.53	..
PA2336	PP4737	421	1.4e-11	1	PA4772	No	No	No	529/923	0.57	..
PA3395	PP5246	421	1.8e-12	1	PA1207	No	No	No	427/749	0.57	..
PA3671	PP2316	420	1.5e-13	1	PA2858	No	No	No	424/711	0.59	..
PA3532	PP3734	420	1e-11	1	PA0041	No	No	No	502/873	0.57	..
PA1485	PP0804	419	1.6e-11	1	PA1876	No	No	No	711/1288	0.55	..
PA2133	PP0672	419	4.1e-12	1	PA4601	No	No	No	405/691	0.58	..
PA3464	PP1325	419	1.4e-11	1	PA4423	No	No	No	569/1021	0.55	..
PA0812	PP1520	418	1.7e-11	1	PA3673	No	No	No	728/1307	0.55	..
PA4175	PP4243	418	2.7e-11	1	PA2424	No	No	No	784/1412	0.55	..
PA0209	PP1705	418	4.8e-12	1	PA1781	No	No	No	492/863	0.57	..
PA5265	PP4906	418	5.7e-11	1	PA4955	No	No	No	634/1145	0.55	..
PA3874	PP0490	418	8.3e-12	1	PA4811	No	Yes	No	526/932	0.56	..
PA0882	PP3450	417	1.6e-11	1	PA0041	No	No	No	685/1218	0.56	..
PA4583	PP0804	417	1.6e-11	1	PA1876	No	No	No	621/1119	0.55	..
PA1619	PP5187	417	2.3e-12	1	PA5209	No	No	No	357/606	0.58	..
PA4585	PP1524	417	1.6e-12	1	PA1161	No	No	No	441/765	0.57	..
PA1397	PP2665	416	5.2e-15	1	PA1978	No	No	No	294/502	0.58	..
PA4485	PP4804	416	1.5e-14	1	PA4000	No	No	No	210/346	0.6	..
PA0855	PP2817	416	5.7e-12	1	PA4599	No	No	No	536/931	0.57	..
PA2927	PP0388	415	2.3e-11	1	PA0577	No	No	No	763/1397	0.54	..
PA0844	PP4124	414	7e-11	1	PA2642	No	No	No	966/1749	0.55	..
PA1595	PP2542	414	1.6e-11	1	PA5283	No	No	No	654/1158	0.56	..
PA3449	PP5242	414	1.6e-11	1	PA2424	No	No	No	416/758	0.54	..
PA0179	PP1492	413	4.9e-14	1	PA3704	No	No	No	225/364	0.61	..
PA0736	PP2470	413	1.8e-11	1	PA2739	No	No	No	467/829	0.56	..
PA1487	PP4221	412	5e-11	1	PA2400	No	Yes	No	828/1493	0.55	..
PA1130	PP2046	412	4.7e-12	1	PA5189	No	Yes	No	394/677	0.58	..
PA2122	PP5185	412	1.5e-11	1	PA5204	No	No	No	526/926	0.56	..
PA0441	PP4546	411	5.3e-11	1	PA3297	No	Yes	No	658/1198	0.54	..
PA3393	PP5120	411	2.5e-11	1	PA0366	No	No	No	595/1071	0.55	..
PA4631	PP3450	411	1.9e-11	1	PA0041	No	No	No	577/1011	0.57	..
PA3958	PP4947	410	3.5e-11	1	PA0782	No	No	No	612/1102	0.55	..
PA4827	PP4158	410	9.3e-12	1	PA1636	No	No	No	462/823	0.56	..
PA3392	PP2024	410	9.5e-11	1	PA4282	No	Yes	No	1004/1867	0.53	..
PA3401	PP2367	410	1.8e-11	1	PA4355	No	No	No	524/919	0.57	..
PA0211	PP1108	410	1.1e-11	1	PA1032	No	Yes	No	496/865	0.57	..
PA4171	PP2725	410	1.2e-14	1	PA0355	No	No	No	274/463	0.59	..
PA3076	PP1750	410	2.2e-11	1	PA3459	No	No	No	474/829	0.57	..
PA0881	PP0805	409	3.6e-11	1	PA1876	No	No	No	749/1340	0.55	..
PA0511	PP2028	409	2.9e-11	1	PA3074	No	Yes	No	625/1115	0.56	..
PA2650	PP1987	409	8.1e-13	1	PA3119	No	No	No	421/725	0.58	..
PA3862	PP3455	409	1e-11	1	PA2019	No	No	No	551/983	0.56	..
PA5472	PP0521	409	4.7e-13	1	PA4049	No	No	No	395/695	0.56	..
PA2475	PP4243	408	7.2e-11	1	PA2424	No	No	No	672/1203	0.55	..
PA3555	PP1749	408	1.3e-11	1	PA3460	No	No	No	480/849	0.56	..
PA1538	PP0403	408	4.9e-11	1	PA0594	No	No	No	632/1131	0.55	..
PA5136	PP2759	407	5.6e-11	1	PA1947	No	No	No	835/1531	0.54	..
PA0070	PP4243	407	2.7e-11	1	PA2424	No	No	No	533/934	0.57	..
PA4624	PP1695	407	1.1e-10	1	PA3271	No	No	No	945/1741	0.54	..
PA3876	PP4583	407	6.2e-11	1	PA1304	No	Yes	No	233/419	0.55	..
PA4091	PP4261	407	8.4e-11	1	PA1549	No	Yes	No	869/1588	0.54	..
PA1833	PP2561	406	4e-11	1	PA2424	No	No	No	526/932	0.56	..
PA2119	PP1616	406	2.2e-11	1	PA3629	No	Yes	No	438/761	0.57	..
PA4396	PP5324	406	1.2e-11	1	PA5364	No	No	No	512/920	0.55	..
PA2844	PP2819	406	3.8e-11	1	PA4597	No	No	No	490/857	0.57	..
PA1245	PP4243	406	7.6e-11	1	PA2424	No	No	No	722/1301	0.55	..
PA2928	PP1027	405	4.2e-11	1	PA3777	No	No	No	669/1197	0.55	..
PA2874	PP4235	405	2.4e-11	1	PA2478	No	No	No	549/981	0.55	..
PA4209	PP4606	405	3.5e-11	1	PA0151	No	Yes	No	555/987	0.56	..
PA2099	PP3164	404	8.1e-13	1	PA2515	No	No	No	438/775	0.56	..
PA2563	PP1407	404	8.5e-11	1	PA1647	No	No	No	642/1162	0.55	..
PA5497	PP0302	404	7.6e-11	1	PA5386	No	No	No	554/985	0.56	..
PA1138	PP5300	404	1.1e-11	1	PA2267	No	No	No	442/781	0.56	..
PA3483	PP0762	403	5.7e-12	1	PA4626	No	No	No	387/668	0.57	..
PA3402	PP0793	402	4.7e-11	1	PA3562	No	No	No	474/834	0.56	..
PA5524	PP1914	402	2.2e-21	2	PA2967	No	Yes	No	252/423	0.59	..
PA4200	PP5088	402	2.6e-11	1	PA5050	No	No	No	474/837	0.56	..
PA3724	PP3478	402	1.1e-10	1	PA1868	No	No	No	756/1383	0.54	..
PA2194	PP3091	401	1.4e-10	1	PA1669	No	No	No	789/1438	0.54	..
PA0086	PP4243	401	3.6e-11	1	PA2424	No	No	No	411/724	0.56	..
PA5150	PP2794	401	9.9e-13	1	PA1470	No	No	No	325/559	0.58	..
PA1708	PP4276	401	9.6e-11	1	PA1527	No	No	No	639/1132	0.56	..
PA2470	PP4243	401	8.7e-11	1	PA2424	No	No	No	615/1099	0.55	..
PA0657	PP2819	401	9.9e-11	1	PA4597	No	No	No	735/1315	0.55	..
PA2892	PP2794	400	3.5e-12	1	PA1470	No	Yes	No	438/776	0.56	..
PA2239	PP4796	400	3.8e-11	1	PA3989	No	No	No	586/1058	0.55	..
PA4195	PP5024	400	5.1e-12	1	PA5076	No	Yes	No	438/794	0.55	..
PA4654	PP3740	400	9.1e-11	1	PA4903	No	No	No	582/1031	0.56	..
PA3713	PP2205	400	1.9e-10	1	PA2065	No	Yes	No	718/1286	0.55	..
PA2679	PP0586	400	1.2e-11	1	PA3920	No	No	No	354/611	0.57	..
PA1839	PP4052	400	6.4e-11	1	PA2163	No	No	No	592/1058	0.55	..
PA2172	PP3750	400	5.5e-11	1	PA0268	No	No	No	486/854	0.56	..
PA3217	PP4220	400	1.8e-10	1	PA2402	No	Yes	No	696/1268	0.54	..
PA3125	PP4158	399	1.5e-10	1	PA1636	No	No	No	494/906	0.54	..
PA1572	PP0556	399	4.8e-11	1	PA4149	No	No	No	587/1056	0.55	..
PA2465	PP1037	399	1.2e-10	1	PA3763	No	No	No	657/1158	0.56	..
PA3333	PP4051	399	5.6e-11	1	PA2164	No	Yes	No	419/753	0.55	..
PA0702	PP2024	399	5.3e-11	1	PA4282	No	No	No	527/945	0.55	..
PA2511	PP2430	399	1.6e-11	1	PA2917	No	No	No	447/792	0.56	..
PA3716	PP1058	399	2.4e-10	1	PA0788	No	No	No	887/1635	0.54	..
PA0027	PP4838	398	1.4e-10	1	PA3790	No	No	No	704/1258	0.55	..
PA1260	PP4486	398	5.5e-12	1	PA0888	No	Yes	No	304/517	0.58	..
PA2946	PP3506	398	4.4e-11	1	PA2942	No	No	No	590/1039	0.56	..
PA1921	PP1524	398	6.2e-12	1	PA1161	No	No	No	438/754	0.58	..
PA4958	PP1325	398	1.6e-10	1	PA4423	No	No	No	680/1216	0.55	..
PA0681	PP1049	397	5.5e-14	1	PA3101	No	No	No	251/410	0.61	..
PA0058	PP1676	397	1.9e-12	1	PA1276	No	No	No	411/719	0.57	..
PA1240	PP3284	397	4.5e-12	1	PA3591	No	No	No	455/809	0.56	..
PA2767	PP2217	397	1.2e-11	1	PA3591	No	No	No	291/482	0.6	..
PA2913	PP2100	397	8.7e-11	1	PA3946	No	No	No	537/929	0.57	..
PA4213	PP4276	396	3.4e-13	1	PA1527	No	Yes	No	374/636	0.58	..
PA1902	PP4276	396	3.4e-13	1	PA1527	No	Yes	No	374/636	0.58	..
PA1694	PP3096	396	3.7e-11	1	PA0089	No	No	No	428/753	0.56	..
PA4217	PP3596	396	9.9e-11	1	PA5084	No	Yes	No	638/1140	0.55	..
PA3939	PP0210	396	2.8e-11	1	PA2293	No	No	No	388/672	0.57	..
PA4591	PP0218	395	1.8e-10	1	PA0285	No	No	No	655/1201	0.54	..
PA1791	PP2316	395	2.2e-10	1	PA2858	No	No	No	535/946	0.56	..
PA3758	PP4158	395	1.4e-10	1	PA1636	No	Yes	No	513/895	0.57	..
PA4190	PP2818	394	2.1e-10	1	PA4598	No	No	No	598/1122	0.53	..
PA3400	PP4158	394	1.7e-10	1	PA1636	No	No	No	574/1022	0.56	..
PA2315	PP0432	394	8.7e-11	1	PA0662	No	No	No	418/710	0.58	..
PA4140	PP4012	394	4e-10	1	PA2624	No	No	No	782/1439	0.54	..
PA2441	PP4613	394	7.1e-11	1	PA3901	No	No	No	506/896	0.56	..
PA4498	PP5200	394	1.4e-10	1	PA5224	No	No	No	470/851	0.55	..
PA2588	PP2004	393	6.9e-11	1	PA3094	No	No	No	555/1008	0.55	..
PA4677	PP2065	393	2.5e-10	1	PA4207	No	No	No	711/1269	0.56	..
PA1024	PP3270	393	1.2e-10	1	PA4844	No	Yes	No	563/978	0.57	..
PA1896	PP4474	391	2.6e-10	1	PA0903	No	No	No	445/782	0.56	..
PA2450	PP2024	389	1.7e-10	1	PA4282	No	No	No	531/958	0.55	..
PA2086	PP1676	389	6.4e-11	1	PA1276	No	No	No	493/868	0.56	..
PA0212	PP4819	388	6.5e-11	1	PA4851	No	Yes	No	448/803	0.55	..
PA3059	PP3202	388	6e-10	1	PA3079	No	No	No	660/1187	0.55	..
PA4338	PP0569	388	2.9e-10	1	PA4821	No	No	No	620/1130	0.54	..
PA0465	PP2819	388	3.5e-10	1	PA4597	No	No	No	698/1259	0.55	..
PA0347	PP0693	387	3.9e-10	1	PA4686	No	Yes	No	651/1179	0.55	..
PA1665	PP4947	387	4.7e-10	1	PA0782	No	No	No	573/1011	0.56	..
PA5207	PP2092	387	2.9e-10	1	PA1783	No	Yes	No	673/1221	0.55	..
PA0509	PP4988	387	7.5e-10	1	PA0413	No	No	No	625/1116	0.56	..
PA4305	PP3450	387	1.9e-10	1	PA0041	No	No	No	515/921	0.55	..
PA3779	PP2024	386	3.6e-10	1	PA4282	No	No	No	580/1030	0.56	..
PA2713	PP2987	386	1.4e-13	1	PA1374	No	No	No	180/286	0.62	..
PA0516	PP2759	386	3.4e-10	1	PA1947	No	Yes	No	544/988	0.55	..
PA1329	PP3193	385	1.9e-13	1	PA1503	No	No	No	255/416	0.61	..
PA0549	PP2148	385	4.2e-10	1	PA3002	No	No	No	412/762	0.54	..
PA1489	PP5199	384	3.4e-10	1	PA5223	No	Yes	No	638/1137	0.56	..
PA4804	PP3641	384	5.6e-10	1	PA5099	No	No	No	664/1209	0.54	..
PA0414	PP4947	384	4.5e-10	1	PA0782	No	No	No	533/971	0.54	..
PA4362	PP3507	383	5.3e-10	1	PA2944	No	No	No	591/1063	0.55	..
PA2083	PP3161	383	5.1e-10	1	PA2518	No	No	No	299/496	0.6	..
PA3959	PP3095	383	8.6e-11	1	PA0090	No	No	No	343/577	0.59	..
PA4775	PP4505	383	1.6e-10	1	PA3206	No	No	No	429/751	0.57	..
PA1904	PP1477	383	1.7e-10	1	PA3725	No	Yes	No	403/694	0.58	..
PA4215	PP1477	383	1.7e-10	1	PA3725	No	Yes	No	403/694	0.58	..
PA0777	PP4979	383	2.3e-11	1	PA4982	No	No	No	399/706	0.56	..
PA3104	PP4906	383	4.1e-11	1	PA4955	No	No	No	331/571	0.57	..
PA2300	PP0693	383	9.8e-10	1	PA4686	No	No	No	579/1045	0.55	..
PA1301	PP3555	382	2e-10	1	PA2388	No	No	No	370/650	0.56	..
PA0097	PP3450	382	7e-10	1	PA0041	No	No	No	554/965	0.57	..
PA4099	PP0793	382	8.9e-10	1	PA3562	No	No	No	692/1247	0.55	..
PA1873	PP3864	382	3.1e-10	1	PA2435	No	No	No	448/782	0.57	..
PA0098	PP4124	381	5.7e-10	1	PA2642	No	No	No	587/1065	0.55	..
PA1023	PP0581	381	2.7e-10	1	PA4786	No	No	No	425/744	0.57	..
PA0177	PP2128	381	5.9e-13	1	PA3349	No	No	No	257/429	0.59	..
PA4824	PP4516	381	1.6e-10	1	PA3344	No	No	No	395/693	0.56	..
PA1869	PP1915	380	6.2e-13	1	PA2966	No	No	No	158/244	0.64	..
PA1525	PP1829	379	3.7e-10	1	PA1680	No	No	No	441/791	0.55	..
PA2825	PP1860	379	3.6e-13	1	PA2849	No	No	No	251/422	0.59	..
PA5326	PP5120	378	8.2e-10	1	PA0366	No	No	No	594/1077	0.55	..
PA4094	PP1711	378	2.5e-10	1	PA2728	No	No	No	304/513	0.59	..
PA4300	PP4243	378	6.7e-10	1	PA2424	No	No	No	383/677	0.56	..
PA0692	PP4173	377	2e-09	1	PA1611	No	No	No	637/1138	0.55	..
PA3058	PP0617	377	7.8e-10	1	PA1072	No	No	No	579/1027	0.56	..
PA5027	PP2131	377	3.3e-10	1	PA3019	No	No	No	407/715	0.56	..
PA2536	PP1905	377	6.9e-10	1	PA2976	No	No	No	547/967	0.56	..
PA4835	PP3515	377	1.4e-09	1	PA1874	No	No	No	355/601	0.59	..
PA0701	PP3463	377	5.7e-10	1	PA4073	No	No	No	483/859	0.56	..
PA2998	PP2255	376	9.5e-10	1	PA0119	No	No	No	554/980	0.56	..
PA4229	PP2096	376	2.5e-10	1	PA3048	No	No	No	420/771	0.54	..
PA4227	PP2838	376	4.9e-10	1	PA1865	No	No	No	524/932	0.56	..
PA4119	PP4158	375	4.4e-10	1	PA1636	No	No	No	367/639	0.57	..
PA2787	PP3552	375	1.2e-09	1	PA4197	No	No	No	577/1026	0.56	..
PA0227	PP0762	374	1.8e-10	1	PA4626	No	No	No	428/763	0.56	..
PA1051	PP0363	374	1.3e-09	1	PA0501	No	No	No	656/1183	0.55	..
PA3669	PP1993	374	1.1e-09	1	PA3115	No	No	No	552/997	0.55	..
PA0785	PP4538	374	4.6e-13	1	PA3223	No	No	No	256/433	0.59	..
PA5132	PP0117	374	1.2e-10	1	PA5501	No	No	No	446/793	0.56	..
PA2452	PP4243	374	1.1e-09	1	PA2424	No	No	No	490/862	0.56	..
PA4128	PP0693	373	5.7e-10	1	PA4686	No	No	No	481/848	0.56	..
PA1303	PP1432	373	1.1e-12	1	PA0768	No	No	No	197/305	0.64	..
PA4319	PP4888	373	1e-09	1	PA2920	No	No	No	507/896	0.56	..
PA2201	PP3491	372	4.9e-10	1	PA0744	No	No	No	334/573	0.58	..
PA3065	PP4813	372	8.9e-10	1	PA4011	No	No	No	508/891	0.57	..
PA3886	PP3001	372	6.2e-10	1	PA3733	No	No	No	412/726	0.56	..
PA0545	PP3062	372	2.7e-09	1	PA0041	No	No	No	390/690	0.56	..
PA2097	PP0222	371	2.5e-09	1	PA2348	No	No	No	513/919	0.55	..
PA1919	PP2430	371	7e-11	1	PA2917	No	No	No	351/595	0.58	..
PA5102	PP5133	371	9e-10	1	PA0345	No	No	No	537/961	0.55	..
PA3771	PP1044	371	1.2e-09	1	PA0041	No	No	No	553/982	0.56	..
PA2344	PP4219	370	1.7e-09	1	PA2424	No	Yes	No	555/983	0.56	..
PA1263	PP0988	370	1.5e-09	1	PA2445	No	No	No	476/836	0.56	..
PA5434	PP4130	370	2.2e-09	1	PA2648	No	No	No	690/1229	0.56	..
PA3969	PP0245	370	2.1e-09	1	PA5201	No	No	No	598/1082	0.55	..
PA1217	PP4493	370	3.6e-09	1	PA2424	No	Yes	No	742/1358	0.54	..
PA5031	PP2723	370	4.6e-10	1	PA2142	No	No	No	412/716	0.57	..
PA1691	PP2818	370	7.4e-10	1	PA4598	No	No	No	460/824	0.55	..
PA1671	PP4338	370	1.6e-09	1	PA1458	No	No	No	277/497	0.55	..
PA3757	PP1697	369	2.2e-10	1	PA2299	No	No	No	373/669	0.55	..
PA1249	PP2561	369	5.3e-09	1	PA2424	No	No	No	473/858	0.55	..
PA0254	PP4947	369	5e-09	1	PA0782	No	Yes	No	793/1428	0.55	..
PA2132	PP4129	369	3.4e-10	1	PA2647	No	No	No	391/675	0.57	..
PA4792	PP1042	369	7e-10	1	PA4734	No	No	No	483/858	0.56	..
PA0260	PP4243	368	1.1e-08	1	PA2424	No	No	No	952/1802	0.52	..
PA2255	PP1705	368	1.4e-09	1	PA1781	No	No	No	508/898	0.56	..
PA3175	PP4539	368	7.1e-10	1	PA3225	No	Yes	No	378/676	0.55	..
PA2287	PP3220	368	4.7e-12	1	PA2061	No	No	No	368/634	0.58	..
PA1539	PP4859	368	2.6e-12	1	PA4890	No	No	No	162/247	0.65	..
PA0432	PP2608	368	1.3e-09	1	PA0025	No	Yes	No	366/646	0.56	..
PA0213	PP2766	367	2.1e-10	1	PA2984	No	No	No	381/668	0.57	..
PA3605	PP3803	367	7.3e-10	1	PA2409	No	No	No	503/893	0.56	..
PA4924	PP1622	367	9.8e-11	1	PA3623	No	No	No	191/308	0.62	..
PA5514	PP3427	367	7.2e-10	1	PA2495	No	No	No	415/737	0.56	..
PA4108	PP4261	367	4e-09	1	PA1549	No	No	No	599/1079	0.55	..
PA3714	PP1012	366	8.4e-12	1	PA3192	No	No	No	326/552	0.59	..
PA1290	PP3527	366	9.2e-13	1	PA0243	No	No	No	296/498	0.59	..
PA1225	PP3720	366	9.8e-13	1	PA4975	No	No	No	326/555	0.58	..
PA4389	PP1745	366	8.7e-17	2	PA3277	No	No	No	184/288	0.63	..
PA1860	PP3467	366	1.2e-09	1	PA4021	No	No	No	392/699	0.56	..
PA0531	PP2635	365	6.7e-10	1	PA4226	No	No	No	355/607	0.58	..
PA0543	PP2549	365	1.9e-09	1	PA1567	No	No	No	539/958	0.56	..
PA0845	PP4583	365	1e-08	1	PA1304	No	No	No	703/1306	0.53	..
PA2863	PP4658	364	1.9e-09	1	PA5072	No	No	No	508/881	0.57	..
PA1255	PP0279	364	2.3e-09	1	PA5156	No	No	No	500/887	0.56	..
PA5192	PP1217	363	4.7e-09	1	PA0967	No	Yes	No	505/912	0.55	..
PA2127	PP4737	363	6e-09	1	PA4772	No	No	No	627/1131	0.55	..
PA3382	PP0869	363	7.9e-11	1	PA3890	No	Yes	No	371/648	0.57	..
PA2209	PP3340	362	4.7e-09	1	PA3910	No	No	No	514/913	0.56	..
PA3513	PP1905	361	5e-09	1	PA2976	No	No	No	561/1019	0.55	..
PA2352	PP3075	361	4.6e-09	1	PA2005	No	No	No	597/1052	0.56	..
PA3571	PP4547	361	2.6e-09	1	PA1566	No	No	No	501/896	0.55	..
PA1740	PP1626	360	5e-09	1	PA3620	No	Yes	No	546/996	0.54	..
PA0697	PP2068	360	3.5e-10	1	PA1237	No	No	No	276/453	0.6	..
PA3508	PP2024	360	3.1e-09	1	PA4282	No	No	No	440/771	0.57	..
PA5262	PP4220	360	7.4e-09	1	PA2402	No	No	No	532/942	0.56	..
PA1016	PP2585	359	6.3e-09	1	PA2217	No	No	No	625/1129	0.55	..
PA3750	PP4505	359	1.3e-09	1	PA3206	No	No	No	399/712	0.56	..
PA4894	PP4783	359	2.1e-12	1	PA3976	No	No	No	275/451	0.6	..
PA2334	PP5337	359	1.8e-09	1	PA5428	No	No	No	519/919	0.56	..
PA4926	PP4224	359	3.3e-09	1	PA2480	No	No	No	529/925	0.57	..
PA1656	PP1897	358	1.5e-08	1	PA2984	No	No	No	676/1205	0.56	..
PA2440	PP0804	358	5.4e-09	1	PA1876	No	No	No	544/974	0.55	..
PA4834	PP4568	358	1.5e-09	1	PA2712	No	No	No	468/827	0.56	..
PA0279	PP3482	358	4e-10	1	PA1911	No	No	No	374/638	0.58	..
PA1209	PP5076	358	5.9e-09	1	PA5036	No	No	No	452/803	0.56	..
PA0878	PP3589	358	2.3e-09	1	PA5518	No	No	No	410/731	0.56	..
PA3913	PP2206	358	4.2e-09	1	PA5440	No	No	No	524/932	0.56	..
PA3871	PP0557	358	2.9e-09	1	PA4147	No	No	No	450/794	0.56	..
PA4299	PP2759	358	1.5e-09	1	PA1947	No	No	No	372/644	0.57	..
PA2216	PP2502	358	2.7e-09	1	PA1328	No	No	No	458/827	0.55	..
PA3850	PP4097	358	1.1e-11	1	PA2584	No	No	No	286/479	0.59	..
PA1169	PP1827	357	1.1e-08	1	PA1678	No	No	No	439/780	0.56	..
PA3264	PP5195	357	4.8e-09	1	PA5216	No	No	No	351/612	0.57	..
PA0810	PP0176	357	1.4e-09	1	PA4226	No	No	No	351/600	0.58	..
PA0558	PP2257	357	2.2e-09	1	PA1561	No	No	No	361/627	0.57	..
PA5456	PP3316	357	1.3e-08	1	PA0459	No	No	No	637/1143	0.55	..
PA4035	PP3357	356	5.9e-09	1	PA4899	No	No	No	580/1027	0.56	..
PA3552	PP1007	356	5.9e-09	1	PA1911	No	No	No	398/722	0.55	..
PA2211	PP4760	356	3.6e-09	1	PA5234	No	No	No	480/862	0.55	..
PA1227	PP3201	355	2.9e-09	1	PA3080	No	No	No	433/755	0.57	..
PA1467	PP4158	355	8.2e-09	1	PA1636	No	No	No	583/1025	0.56	..
PA4027	PP2193	355	6.2e-09	1	PA4675	No	No	No	507/887	0.57	..
PA0076	PP0188	355	8.8e-10	1	PA5258	No	No	No	373/635	0.58	..
PA0902	PP3357	355	6.7e-09	1	PA4899	No	Yes	No	537/971	0.55	..
PA3378	PP4243	355	1.4e-08	1	PA2424	No	No	No	528/939	0.56	..
PA4871	PP2018	355	1.1e-11	1	PA3080	No	No	No	273/458	0.59	..
PA2254	PP1047	355	6.4e-09	1	PA3103	No	No	No	551/989	0.55	..
PA2215	PP3715	355	7.6e-09	1	PA2509	No	No	No	359/623	0.57	..
PA1015	PP3450	354	4.6e-09	1	PA0041	No	No	No	444/771	0.57	..
PA4908	PP2638	354	8.8e-09	1	PA4225	No	No	No	500/891	0.56	..
PA2034	PP4124	354	1.6e-09	1	PA2642	No	No	No	316/540	0.58	..
PA0520	PP3201	354	2.4e-09	1	PA3080	No	No	No	444/777	0.57	..
PA1211	PP2760	354	3e-10	1	PA2431	No	No	No	378/648	0.58	..
PA2338	PP1972	354	1.1e-08	1	PA3139	No	Yes	No	590/1095	0.53	..
PA2498	PP1834	354	4.2e-12	1	PA3287	No	No	No	298/525	0.56	..
PA4582	PP0199	353	3.6e-09	1	PA0452	No	No	No	415/748	0.55	..
PA4716	PP1108	352	7.5e-09	1	PA1032	No	No	No	456/809	0.56	..
PA2488	PP4949	352	3.8e-09	1	PA2529	No	No	No	452/794	0.56	..
PA1094	PP2024	352	2.8e-08	1	PA4282	No	No	No	692/1238	0.55	..
PA4120	PP0762	352	4.5e-09	1	PA4626	No	No	No	474/836	0.56	..
PA1002	PP0420	352	4.6e-12	1	PA0649	No	Yes	No	250/425	0.58	..
PA5458	PP3221	352	7.1e-09	1	PA4504	No	No	No	428/758	0.56	..
PA2962	PP5242	352	7.9e-10	1	PA2424	No	Yes	No	348/608	0.57	..
PA3500	PP3736	352	7.2e-09	1	PA4904	No	No	No	548/998	0.54	..
PA4404	PP0553	352	5.7e-09	1	PA4152	No	No	No	436/770	0.56	..
PA3484	PP4316	352	8.8e-09	1	PA0316	No	No	No	358/608	0.58	..
PA1226	PP0822	351	2.1e-11	1	PA1643	No	No	No	315/534	0.58	..
PA2129	PP0603	351	4.9e-09	1	PA4560	No	No	No	341/597	0.57	..
PA2958	PP4243	351	2.3e-08	1	PA2424	No	No	No	583/1041	0.56	..
PA5151	PP0586	351	2.7e-09	1	PA3920	No	No	No	395/681	0.58	..
PA1541	PP4930	351	9e-12	1	PA4990	No	No	No	191/315	0.6	..
PA2088	PP3201	351	4.6e-09	1	PA3080	No	No	No	457/807	0.56	..
PA2063	PP2167	351	1.9e-08	1	PA2049	No	No	No	661/1212	0.54	..
PA0536	PP3450	351	1.4e-08	1	PA0041	No	No	No	558/1044	0.53	..
PA3912	PP4124	351	9.9e-09	1	PA2642	No	No	No	453/804	0.56	..
PA2257	PP2028	351	1.1e-09	1	PA3074	No	No	No	383/669	0.57	..
PA0841	PP0762	350	6.6e-09	1	PA4626	No	No	No	398/709	0.56	..
PA3293	PP3724	350	7.5e-09	1	PA4978	No	No	No	354/616	0.57	..
PA1858	PP1274	350	2.8e-09	1	PA3883	No	No	No	410/712	0.57	..
PA1717	PP4737	350	2.7e-08	1	PA4772	No	No	No	698/1294	0.53	..
PA5467	PP0150	350	1e-11	1	PA5463	No	No	No	150/226	0.66	..
PA0675	PP2192	350	2.3e-11	1	PA1300	No	No	No	292/502	0.58	..
PA4181	PP4737	350	4.5e-09	1	PA4772	No	No	No	390/682	0.57	..
PA0682	PP3483	349	1.3e-08	1	PA3103	No	No	No	441/779	0.56	..
PA1698	PP3455	349	7.1e-09	1	PA2019	No	No	No	345/587	0.58	..
PA2661	PP4243	349	1.5e-08	1	PA2424	No	No	No	525/932	0.56	..
PA3973	PP4243	349	2.3e-09	1	PA2424	No	No	No	381/674	0.56	..
PA0951	PP2024	349	2.9e-08	1	PA4282	No	No	No	629/1151	0.54	..
PA3829	PP2409	348	1e-08	1	PA2521	No	No	No	346/606	0.57	..
PA2541	PP0569	348	1.1e-09	1	PA4821	No	No	No	324/573	0.56	..
PA2237	PP1384	347	2.9e-08	1	PA0427	No	No	No	587/1072	0.54	..
PA2281	PP4283	347	3.5e-09	1	PA1520	No	No	No	255/421	0.6	..
PA1060	PP4951	347	1.2e-08	1	PA0458	No	No	No	445/784	0.56	..
PA0677	PP1655	347	1.5e-09	1	PA0933	No	No	No	363/625	0.58	..
PA2939	PP2185	345	6.8e-08	1	PA1779	No	No	No	901/1689	0.53	..
PA4116	PP1311	344	5.2e-11	1	PA4439	No	No	No	336/574	0.58	..
PA0705	PP1829	344	1.1e-08	1	PA1680	No	No	No	518/937	0.55	..
PA4341	PP0715	344	9.9e-09	1	PA0427	No	No	No	442/778	0.56	..
PA2376	PP1186	344	5.1e-10	1	PA1179	No	No	No	246/418	0.58	..
PA1293	PP5088	344	3.2e-08	1	PA5050	No	Yes	No	578/1033	0.55	..
PA3851	PP1325	344	9.9e-09	1	PA4423	No	No	No	374/664	0.56	..
PA3179	PP5187	344	3e-08	1	PA5209	No	No	No	574/1027	0.55	..
PA5531	PP4220	344	3.8e-08	1	PA2402	No	No	No	566/1018	0.55	..
PA4301	PP3226	343	1.5e-08	1	PA2597	No	No	No	481/884	0.54	..
PA5033	PP1197	343	2.3e-08	1	PA0916	No	No	No	515/917	0.56	..
PA2080	PP1989	343	3.2e-08	1	PA3117	No	Yes	No	523/947	0.55	..
PA3372	PP1086	343	7.9e-09	1	PA3527	No	No	No	411/740	0.55	..
PA1088	PP1524	343	4.7e-09	1	PA1161	No	No	No	373/662	0.56	..
PA0188	PP2840	343	1.5e-08	1	PA2662	No	No	No	355/620	0.57	..
PA2337	PP2643	343	2.1e-08	1	PA1251	No	No	No	443/791	0.56	..
PA1495	PP1759	343	2.8e-11	1	PA0859	No	No	No	351/602	0.58	..
PA0121	PP5206	342	6.3e-09	1	PA5232	No	No	No	358/612	0.58	..
PA4878	PP0585	342	6.2e-11	1	PA4778	No	No	No	234/396	0.59	..
PA1686	PP1516	342	1.6e-08	1	PA3677	No	No	No	508/885	0.57	..
PA1687	PP1867	342	6.7e-09	1	PA2842	No	Yes	No	296/519	0.57	..
PA3575	PP4220	342	1.1e-10	1	PA2402	No	No	No	328/558	0.58	..
PA0469	PP4219	342	2.9e-08	1	PA2424	No	No	No	394/693	0.56	..
PA0007	PP2080	342	1.1e-07	1	PA3068	No	No	No	818/1494	0.54	..
PA2095	PP4243	341	3.1e-08	1	PA2424	No	No	No	505/895	0.56	..
PA1765	PP4211	341	4.4e-08	1	PA2391	No	No	No	507/907	0.55	..
PA3882	PP0586	341	1.5e-08	1	PA3920	No	No	No	379/661	0.57	..
PA2566	PP4058	341	5.6e-08	1	PA2153	No	No	No	603/1111	0.54	..
PA3836	PP3585	341	2.7e-08	1	PA2528	No	No	No	545/982	0.55	..
PA0566	PP3751	341	6.5e-11	1	PA2500	No	No	No	295/493	0.59	..
PA3968	PP2029	340	6.4e-11	1	PA3073	No	No	No	280/473	0.59	..
PA4589	PP3507	340	9.6e-08	1	PA2944	No	Yes	No	640/1181	0.54	..
PA4040	PP5133	340	3.4e-08	1	PA0345	No	No	No	440/788	0.55	..
PA3619	PP0388	340	4.2e-08	1	PA0577	No	No	No	340/599	0.56	..
PA0147	PP0788	340	3.9e-08	1	PA4523	No	No	No	464/833	0.55	..
PA2706	PP2174	339	2.7e-11	1	PA4177	No	No	No	225/384	0.58	..
PA4774	PP0613	339	4.3e-08	1	PA0202	No	No	No	323/561	0.57	..
PA4170	PP2316	339	4.2e-08	1	PA2858	No	No	No	497/900	0.55	..
PA0275	PP2533	339	6.4e-09	1	PA2135	No	No	No	325/552	0.58	..
PA1871	PP1108	339	8e-08	1	PA1032	No	No	No	525/930	0.56	..
PA5457	PP0365	338	1.4e-08	1	PA0503	No	No	No	460/838	0.54	..
PA2067	PP0934	338	6e-09	1	PA4480	No	No	No	372/649	0.57	..
PA0026	PP0287	338	5.2e-08	1	PA5146	No	No	No	512/931	0.54	..
PA3127	PP2408	338	2.1e-08	1	PA2522	No	No	No	352/613	0.57	..
PA2726	PP1819	338	6.5e-09	1	PA1646	No	No	No	352/607	0.57	..
PA1652	PP4276	338	7.3e-09	1	PA1527	No	No	No	356/622	0.57	..
PA0259	PP2502	338	5.5e-08	1	PA1328	No	No	No	312/532	0.58	..
PA3052	PP4372	337	4e-08	1	PA1098	No	No	No	491/869	0.56	..
PA3098	PP1108	337	1.9e-08	1	PA1032	No	No	No	377/665	0.56	..
PA3494	PP4369	337	1.8e-08	1	PA1101	No	No	No	391/686	0.56	..
PA1764	PP4276	337	1.6e-07	1	PA1527	No	No	No	759/1382	0.54	..
PA3731	PP4235	336	1.6e-08	1	PA2478	No	No	No	384/681	0.56	..
PA4038	PP2885	336	1.7e-08	1	PA1908	No	No	No	380/657	0.57	..
PA1714	PP2599	335	4.5e-08	1	PA2727	No	No	No	437/778	0.56	..
PA3885	PP4737	335	1.4e-08	1	PA4772	No	No	No	317/544	0.58	..
PA2233	PP2124	335	4.2e-08	1	PA2238	No	No	No	483/868	0.55	..
PA1540	PP1701	335	5e-11	1	PA3265	No	No	No	167/265	0.63	..
PA0377	PP3734	335	4.6e-09	1	PA0041	No	No	No	339/586	0.57	..
PA2936	PP2010	334	3.2e-11	1	PA0918	No	No	No	222/365	0.6	..
PA0521	PP0106	334	9.3e-11	1	PA0108	No	No	No	290/518	0.55	..
PA5047	PP5327	334	1.5e-07	1	PA5367	No	No	No	794/1454	0.54	..
PA1895	PP0602	334	7.2e-08	1	PA4561	No	No	No	376/650	0.57	..
PA0562	PP3745	333	1.8e-08	1	PA5355	No	No	No	381/678	0.56	..
PA1018	PP3864	333	4.6e-08	1	PA2435	No	No	No	447/786	0.56	..
PA2895	PP3751	333	2.9e-08	1	PA2500	No	No	No	309/522	0.59	..
PA0075	PP4673	333	3.8e-08	1	PA4284	No	No	No	385/672	0.57	..
PA5273	PP4988	332	4e-08	1	PA0413	No	No	No	346/604	0.57	..
PA2574	PP2836	332	9.9e-08	1	PA3327	No	No	No	298/505	0.59	..
PA5509	PP1007	332	1.4e-08	1	PA1911	No	No	No	352/628	0.56	..
PA3772	PP2029	332	4.9e-08	1	PA3073	No	No	No	506/910	0.55	..
PA1219	PP2766	332	6.3e-09	1	PA2984	No	No	No	350/595	0.58	..
PA1402	PP2185	332	2.4e-08	1	PA1779	No	No	No	374/661	0.56	..
PA1291	PP3751	331	5e-08	1	PA2500	No	No	No	451/788	0.57	..
PA4039	PP4243	331	4.3e-07	1	PA2424	No	No	No	857/1593	0.53	..
PA3414	PP3427	331	2.4e-09	1	PA2495	No	No	No	341/575	0.59	..
PA3844	PP0335	331	1.1e-09	1	PA0467	No	No	No	269/449	0.59	..
PA0735	PP2383	331	2.8e-08	1	PA3269	No	No	No	369/650	0.56	..
PA4083	PP3864	331	3.3e-08	1	PA2435	No	No	No	441/773	0.57	..
PA1940	PP0855	331	2.2e-08	1	PA3801	No	No	No	365/644	0.56	..
PA4074	PP4243	331	3.3e-08	1	PA2424	No	No	No	403/692	0.58	..
PA0473	PP4674	330	6e-08	1	PA4285	No	No	No	430/756	0.56	..
PA3437	PP0581	330	3.1e-08	1	PA4786	No	No	No	346/594	0.58	..
PA0044	PP2065	330	2.6e-07	1	PA4207	No	No	No	534/966	0.55	..
PA4884	PP2408	330	1.1e-08	1	PA2522	No	No	No	370/642	0.57	..
PA5536	PP4693	330	6e-11	1	PA4723	No	No	No	224/381	0.58	..
PA3359	PP3221	329	7.3e-08	1	PA4504	No	No	No	341/604	0.56	..
PA2934	PP4624	329	6.4e-08	1	PA3429	No	No	No	175/280	0.62	..
PA2789	PP4830	329	1.2e-07	1	PA2907	No	No	No	513/919	0.55	..
PA2724	PP1728	329	3.3e-10	1	PA5121	No	No	No	265/454	0.58	..
PA3837	PP2100	329	1.2e-07	1	PA3946	No	No	No	463/838	0.55	..
PA3379	PP4539	329	1e-08	1	PA3225	No	No	No	265/463	0.57	..
PA1363	PP4208	328	1.8e-10	1	PA2387	No	No	No	276/482	0.57	..
PA2999	PP1770	328	2.8e-07	1	PA3164	No	No	No	352/623	0.56	..
PA1061	PP5208	328	1.3e-07	1	PA5230	No	No	No	444/800	0.55	..
PA3873	PP0372	328	4.7e-08	1	PA0530	No	Yes	No	348/605	0.57	..
PA1916	PP2455	328	2.1e-07	1	PA1947	No	No	No	668/1193	0.55	..
PA4191	PP0555	327	1e-07	1	PA4150	No	No	No	429/762	0.56	..
PA4327	PP4658	327	9.3e-08	1	PA5072	No	No	No	479/852	0.56	..
PA5101	PP2826	327	4.8e-08	1	PA2492	No	No	No	373/648	0.57	..
PA0790	PP5004	327	4.6e-08	1	PA5057	No	No	No	359/633	0.56	..
PA0028	PP1027	327	1.2e-08	1	PA3777	No	No	No	361/624	0.57	..
PA1297	PP3726	327	6.5e-08	1	PA4980	No	No	No	457/792	0.57	..
PA1879	PP2408	326	3.4e-10	1	PA2522	No	No	No	322/559	0.57	..
PA2116	PP3864	326	7.8e-08	1	PA2435	No	No	No	460/823	0.55	..
PA3218	PP0778	325	3.6e-10	1	PA0842	No	No	No	267/461	0.57	..
PA4540	PP2354	325	5.6e-07	1	PA1243	No	No	No	543/965	0.56	..
PA2884	PP4235	325	9.2e-08	1	PA2478	No	No	No	359/632	0.56	..
PA2362	PP1182	325	8.6e-08	1	PA1158	No	No	No	335/587	0.57	..
PA4883	PP4235	325	2.3e-08	1	PA2478	No	No	No	299/503	0.59	..
PA2117	PP4899	324	1.1e-07	1	PA4949	No	No	No	452/813	0.55	..
PA1213	PP0067	324	1.2e-07	1	PA0018	No	No	No	498/903	0.55	..
PA3322	PP4729	324	6.8e-08	1	PA4763	No	No	No	390/690	0.56	..
PA4297	PP5133	324	5e-07	1	PA0345	No	No	No	358/624	0.57	..
PA0659	PP0707	324	3e-07	1	PA1408	No	No	No	614/1110	0.55	..
PA1645	PP4813	323	4.8e-10	1	PA4011	No	No	No	237/382	0.62	..
PA2208	PP1673	323	4.7e-10	1	PA1273	No	No	No	331/565	0.58	..
PA0999	PP2733	323	7.8e-10	1	PA1313	No	Yes	No	297/508	0.58	..
PA4368	PP4243	323	2.7e-07	1	PA2424	No	No	No	520/947	0.54	..
PA1170	PP3726	323	4.3e-08	1	PA4980	No	No	No	389/694	0.56	..
PA3015	PP0381	323	1.6e-07	1	PA1973	No	No	No	281/475	0.59	..
PA3097	PP3282	323	2.3e-07	1	PA1628	No	No	No	385/682	0.56	..
PA4918	PP2470	323	6.4e-08	1	PA2739	No	No	No	363/637	0.56	..
PA5342	PP4489	323	1.3e-07	1	PA0873	No	No	No	427/760	0.56	..
PA3037	PP4783	322	3e-08	1	PA3976	No	No	No	350/623	0.56	..
PA0311	PP1031	322	5.7e-10	1	PA3770	No	No	No	312/527	0.59	..
PA4544	PP0684	322	3.6e-08	1	PA4572	No	Yes	No	356/617	0.57	..
PA2284	PP3557	322	7.7e-08	1	PA2654	No	No	No	290/500	0.58	..
PA2020	PP1047	322	4.2e-08	1	PA3103	No	No	No	338/593	0.56	..
PA4185	PP4277	322	2.4e-08	1	PA1526	No	No	No	372/674	0.55	..
PA1153	PP3506	322	4.2e-10	1	PA2942	No	No	No	254/428	0.59	..
PA5470	PP0733	322	2.5e-08	1	PA4665	No	No	No	174/281	0.61	..
PA4317	PP4220	321	1.7e-07	1	PA2402	No	No	No	413/735	0.56	..
PA4070	PP2316	321	3.1e-07	1	PA2858	No	No	No	461/819	0.56	..
PA3062	PP4328	321	6.6e-10	1	PA1474	No	No	No	309/519	0.59	..
PA4216	PP3507	321	7.7e-08	1	PA2944	No	Yes	No	309/534	0.57	..
PA1000	PP4269	321	2.6e-07	1	PA1532	No	No	No	379/663	0.57	..
PA3337	PP1505	321	3.6e-07	1	PA3687	No	Yes	No	555/999	0.55	..
PA1905	PP3507	321	8e-08	1	PA2944	No	Yes	No	309/534	0.57	..
PA2484	PP4219	320	6.5e-08	1	PA2424	No	No	No	364/643	0.56	..
PA3766	PP1271	320	5.1e-07	1	PA2835	No	No	No	668/1234	0.54	..
PA1825	PP5133	320	6.2e-08	1	PA0345	No	No	No	376/661	0.56	..
PA4676	PP5190	320	7.1e-08	1	PA5210	No	No	No	342/598	0.57	..
PA2229	PP5197	320	1e-07	1	PA5221	No	No	No	424/760	0.55	..
PA3323	PP4221	320	3.4e-07	1	PA2400	No	No	No	444/778	0.57	..
PA2997	PP3745	319	1.9e-07	1	PA5355	No	No	No	365/653	0.55	..
PA4610	PP0533	319	7.4e-10	1	PA2687	No	No	No	223/371	0.6	..
PA1709	PP2767	319	1.4e-07	1	PA1071	No	No	No	483/857	0.56	..
PA1872	PP4261	319	2.4e-07	1	PA1549	No	No	No	421/755	0.55	..
PA4041	PP4999	319	4.4e-07	1	PA0401	No	No	No	357/620	0.57	..
PA3715	PP4124	319	2.5e-07	1	PA2642	No	No	No	439/788	0.55	..
PA0636	PP0200	319	9.6e-07	1	PA0451	No	No	No	609/1130	0.53	..
PA2339	PP3226	318	2.8e-07	1	PA2597	No	Yes	No	492/891	0.55	..
PA5542	PP4890	318	5.2e-07	1	PA4939	No	No	No	382/678	0.56	..
PA5486	PP5246	318	4.1e-08	1	PA1207	No	No	No	342/612	0.55	..
PA0417	PP4161	318	5.7e-08	1	PA1633	No	No	No	318/555	0.57	..
PA1200	PP0793	318	1.3e-07	1	PA3562	No	No	No	344/597	0.57	..
PA1688	PP4493	318	3.7e-07	1	PA2424	No	No	No	476/849	0.56	..
PA0695	PP2018	317	1.3e-07	1	PA3080	No	No	No	263/439	0.59	..
PA3381	PP2601	317	7.9e-08	1	PA0236	No	No	No	315/550	0.57	..
PA0145	PP4737	317	1.3e-09	1	PA4772	No	No	No	251/427	0.58	..
PA3207	PP3830	317	7.7e-10	1	PA1861	No	No	No	249/415	0.6	..
PA2918	PP5175	316	1.9e-07	1	PA0156	No	No	No	384/695	0.55	..
PA0910	PP3950	316	1.3e-09	1	PA1646	No	No	No	290/494	0.58	..
PA1670	PP5133	316	1.9e-07	1	PA0345	No	No	No	344/590	0.58	..
PA5502	PP2046	316	1.7e-07	1	PA5189	No	No	No	396/716	0.55	..
PA4681	PP1819	316	5.9e-07	1	PA1646	No	No	No	574/1037	0.55	..
PA2814	PP0602	316	9.1e-08	1	PA4561	No	No	No	362/632	0.57	..
PA0348	PP3280	316	5.2e-07	1	PA0228	No	No	No	514/926	0.55	..
PA4916	PP1520	315	2.2e-07	1	PA3673	No	No	No	365/651	0.56	..
PA0732	PP3001	315	5.3e-07	1	PA3733	No	No	No	499/897	0.55	..
PA2671	PP0210	315	4.4e-07	1	PA2293	No	No	No	479/849	0.56	..
PA3261	PP2234	315	1.7e-07	1	PA3782	No	No	No	441/777	0.56	..
PA0574	PP4211	315	6.8e-07	1	PA2391	No	No	No	469/822	0.57	..
PA1377	PP5299	315	1.2e-09	1	PA2040	No	No	No	281/480	0.58	..
PA1406	PP2430	314	1.6e-07	1	PA2917	No	No	No	320/547	0.58	..
PA0187	PP3529	314	3.5e-07	1	PA2326	No	No	No	424/751	0.56	..
PA0595	PP0338	314	3.2e-06	1	PA5016	No	No	No	618/1120	0.55	..
PA0814	PP5058	314	1.2e-09	1	PA5134	No	No	No	136/236	0.57	..
PA3383	PP4683	313	8.4e-07	1	PA4700	No	Yes	No	471/848	0.55	..
PA1515	PP3490	313	9.8e-07	1	PA0041	No	Yes	No	375/671	0.55	..
PA3174	PP2766	313	2.3e-07	1	PA2984	No	No	No	357/632	0.56	..
PA0544	PP4607	313	2.1e-07	1	PA0150	No	No	No	375/662	0.56	..
PA1888	PP1037	313	1.8e-06	1	PA3763	No	No	No	533/953	0.55	..
PA5507	PP3095	313	2.1e-07	1	PA0090	No	No	No	281/488	0.57	..
PA0749	PP3357	313	4.1e-07	1	PA4899	No	No	No	451/806	0.55	..
PA3396	PP1759	312	2.9e-10	1	PA0859	No	No	No	256/432	0.59	..
PA1924	PP1673	312	1.5e-09	1	PA1273	No	No	No	280/465	0.6	..
PA2474	PP4154	312	7.8e-07	1	PA0266	No	No	No	524/936	0.55	..
PA2732	PP4269	312	5.6e-06	1	PA1532	No	No	No	796/1485	0.53	..
PA3536	PP2253	312	5e-10	1	PA1520	No	No	No	270/453	0.59	..
PA2242	PP3515	312	1e-06	1	PA1874	No	No	No	574/1041	0.55	..
PA5220	PP4243	312	7.1e-07	1	PA2424	No	No	No	396/720	0.55	..
PA1043	PP3282	312	4.5e-07	1	PA1628	No	No	No	298/516	0.57	..
PA0674	PP4514	311	3.9e-07	1	PA3339	No	No	No	387/679	0.56	..
PA0684	PP0066	311	9.2e-08	1	PA0017	No	No	No	319/550	0.58	..
PA0828	PP5197	311	2.3e-07	1	PA5221	No	No	No	335/595	0.56	..
PA0144	PP5036	311	1.5e-07	1	PA5106	No	No	No	367/628	0.58	..
PA3152	PP0290	311	3.1e-08	1	PA5142	No	Yes	No	167/280	0.59	..
PA2682	PP4546	310	4.7e-11	2	PA3297	No	No	No	496/887	0.55	..
PA0020	PP1626	310	1.2e-06	1	PA3620	No	No	No	532/974	0.54	..
PA3558	PP1676	310	1.5e-09	1	PA1276	No	No	No	252/425	0.59	..
PA1197	PP1325	310	5.3e-07	1	PA4423	No	No	No	396/707	0.56	..
PA2564	PP3721	310	5.1e-07	1	PA4976	No	No	No	466/839	0.55	..
PA2720	PP1492	310	2.5e-07	1	PA3704	No	No	No	306/536	0.57	..
PA2782	PP2033	310	2.4e-07	1	PA3327	No	No	No	390/692	0.56	..
PA1469	PP2823	310	4e-07	1	PA4633	No	No	No	336/575	0.58	..
PA0800	PP4610	309	2.6e-09	1	PA0801	No	No	No	151/240	0.62	..
PA2423	PP0793	309	7.5e-07	1	PA3562	No	No	No	343/603	0.56	..
PA3246	PP4582	309	7.2e-10	1	PA1305	No	Yes	No	233/393	0.59	..
PA4869	PP0338	309	1.6e-06	1	PA5016	No	No	No	503/921	0.54	..
PA5325	PP1626	309	1.2e-06	1	PA3620	No	No	No	499/909	0.54	..
PA4492	PP2356	309	7.5e-07	1	PA4117	No	No	No	363/630	0.57	..
PA2377	PP2584	308	1.8e-06	1	PA0142	No	No	No	570/1045	0.54	..
PA0629	PP4627	308	1.5e-07	1	PA3433	No	No	No	340/589	0.57	..
PA3114	PP2312	308	8e-07	1	PA2865	No	Yes	No	426/754	0.56	..
PA0080	PP4210	308	2.9e-09	1	PA2390	No	No	No	272/472	0.57	..
PA4888	PP2316	308	1.8e-06	1	PA2858	No	No	No	526/940	0.55	..
PA2464	PP2354	308	3.1e-09	1	PA1243	No	No	No	304/529	0.57	..
PA3872	PP4794	307	5.3e-07	1	PA3987	No	Yes	No	381/668	0.57	..
PA0827	PP2344	307	7.7e-07	1	PA2660	No	No	No	411/713	0.57	..
PA1867	PP2747	307	2e-09	1	PA1646	No	No	No	271/458	0.59	..
PA1391	PP1905	307	4.6e-06	1	PA2976	No	No	No	867/1589	0.54	..
PA2994	PP5128	306	2.4e-06	1	PA0353	No	No	No	498/900	0.55	..
PA3320	PP4819	306	3e-09	1	PA4851	No	No	No	226/378	0.59	..
PA3784	PP4999	306	1.2e-07	1	PA0401	No	No	No	332/579	0.57	..
PA2878	PP5039	306	6e-08	1	PA5109	No	No	No	202/342	0.59	..
PA3780	PP4276	306	4.1e-09	1	PA1527	No	No	No	308/522	0.59	..
PA0226	PP1037	306	1.4e-06	1	PA3763	No	No	No	348/609	0.57	..
PA1536	PP3726	306	1.5e-08	1	PA4980	No	No	No	284/486	0.58	..
PA1604	PP2157	306	1.1e-06	1	PA2810	No	No	No	336/573	0.58	..
PA2833	PP3156	306	2e-09	1	PA2729	No	No	No	264/438	0.6	..
PA3493	PP3331	306	3.6e-07	1	PA0435	No	No	No	370/645	0.57	..
PA4836	PP2024	306	1.1e-06	1	PA4282	No	No	No	416/750	0.55	..
PA3095	PP1679	306	2.4e-09	1	PA1279	No	No	No	288/504	0.57	..
PA0277	PP5187	306	6.8e-07	1	PA5209	No	No	No	402/717	0.56	..
PA0274	PP3763	306	3.4e-07	1	PA5092	No	No	No	290/507	0.57	..
PA5268	PP4017	306	1.2e-06	1	PA2630	No	Yes	No	354/624	0.56	..
PA3282	PP2399	305	2.7e-07	1	PA4105	No	No	No	257/439	0.58	..
PA5167	PP3148	305	1.5e-06	1	PA0298	No	Yes	No	507/955	0.53	..
PA5318	PP3515	305	8.1e-08	1	PA1874	No	No	No	309/535	0.57	..
PA5409	PP3456	305	1.4e-07	1	PA2018	No	No	No	305/526	0.57	..
PA3100	PP1049	304	8.7e-10	1	PA3101	No	No	No	206/344	0.59	..
PA5115	PP2083	304	1.6e-07	1	PA1771	No	No	No	252/428	0.58	..
PA0798	PP4243	304	7.2e-07	1	PA2424	No	No	No	316/542	0.58	..
PA4318	PP3557	304	1.2e-06	1	PA2654	No	No	No	430/767	0.56	..
PA4882	PP4988	304	1.3e-06	1	PA0413	No	No	No	376/665	0.56	..
PA5459	PP3221	304	7.8e-07	1	PA4504	No	No	No	436/809	0.53	..
PA1638	PP2024	304	2e-06	1	PA4282	No	Yes	No	472/878	0.53	..
PA5330	PP3930	304	1.4e-09	1	PA5183	No	No	No	198/326	0.6	..
PA3317	PP2596	303	9.6e-07	1	PA4223	No	No	No	385/687	0.56	..
PA5138	PP3202	303	1.2e-06	1	PA3079	No	No	No	331/579	0.57	..
PA4994	PP3095	303	3.7e-06	1	PA0090	No	No	No	645/1179	0.54	..
PA4690	PP4974	303	2.8e-06	1	PA3887	No	No	No	475/870	0.54	..
PA3953	PP1829	303	1.7e-07	1	PA1680	No	No	No	297/513	0.57	..
PA0710	PP3766	303	8.4e-10	1	PA5111	No	Yes	No	159/255	0.62	..
PA3783	PP2918	302	5.9e-07	1	PA2542	No	No	No	364/646	0.56	..
PA5270	PP0691	302	1.4e-06	1	PA4565	No	No	No	288/487	0.59	..
PA3734	PP0584	302	3.7e-06	1	PA4633	No	No	No	624/1126	0.55	..
PA3853	PP2750	302	6.3e-07	1	PA4860	No	No	No	258/430	0.6	..
PA1685	PP1764	302	3.7e-07	1	PA3172	No	Yes	No	330/577	0.57	..
PA1136	PP2567	301	7.6e-07	1	PA1622	No	No	No	313/542	0.57	..
PA2451	PP4225	301	1.5e-07	1	PA2479	No	No	No	325/557	0.58	..
PA1315	PP2206	301	4.5e-07	1	PA5440	No	No	No	219/359	0.61	..
PA2081	PP0586	301	7.7e-07	1	PA3920	No	Yes	No	345/599	0.57	..
PA0054	PP3131	301	1.5e-07	1	PA4393	No	No	No	305/521	0.58	..
PA4682	PP3373	300	3.7e-06	1	PA3648	No	No	No	422/765	0.55	..
PA3765	PP1246	300	4.2e-07	1	PA1874	No	No	No	230/375	0.61	..
PA4092	PP4844	300	3.6e-09	1	PA4861	No	Yes	No	274/465	0.58	..
PA0598	PP2148	300	1.8e-06	1	PA3002	No	No	No	418/738	0.56	..
PA5144	PP2766	300	4.9e-09	1	PA2984	No	No	No	192/309	0.62	..
PA0057	PP4830	300	1.9e-06	1	PA2907	No	No	No	396/702	0.56	..
PA2107	PP1750	300	6.5e-09	1	PA3459	No	No	No	248/417	0.59	..
PA3407	PP0672	300	7.7e-07	1	PA4601	No	No	No	322/567	0.56	..
PA0146	PP1346	299	3.4e-06	1	PA4402	No	No	No	425/757	0.56	..
PA1745	PP4493	299	8.4e-09	1	PA2424	No	No	No	283/472	0.59	..
PA4124	PP2819	299	2.6e-06	1	PA4597	No	Yes	No	519/937	0.55	..
PA3325	PP4243	299	3.6e-06	1	PA2424	No	No	No	363/663	0.54	..
PA0883	PP4826	299	2.2e-06	1	PA2903	No	No	No	439/775	0.56	..
PA2750	PP0519	299	4.7e-09	1	PA4051	No	No	No	295/499	0.59	..
PA5414	PP5256	299	7.9e-07	1	PA1408	No	No	No	321/559	0.57	..
PA1578	PP4772	299	1.9e-06	1	PA3961	No	No	No	417/760	0.54	..
PA0096	PP3201	299	5.2e-09	1	PA3080	No	No	No	223/367	0.6	..
PA1706	PP3450	299	2.9e-06	1	PA0041	No	No	No	281/496	0.56	..
PA3259	PP5242	298	1e-08	1	PA2424	No	No	No	292/494	0.59	..
PA4800	PP2632	298	2.2e-06	1	PA5114	No	No	No	438/782	0.56	..
PA0047	PP3450	298	8.8e-09	1	PA0041	No	No	No	294/503	0.58	..
PA1269	PP3649	298	5.4e-07	1	PA1520	No	No	No	324/575	0.56	..
PA0707	PP5270	298	1.8e-06	1	PA5304	No	No	No	264/455	0.58	..
PA3788	PP2791	297	6.8e-09	1	PA0345	No	No	No	239/405	0.59	..
PA3857	PP0804	297	1.9e-06	1	PA1876	No	No	No	355/627	0.56	..
PA2821	PP4889	297	1.1e-06	1	PA4938	No	No	No	361/630	0.57	..
PA3066	PP2068	297	4.3e-07	1	PA1237	No	No	No	299/510	0.58	..
PA2271	PP5310	297	9.4e-09	1	PA5345	No	No	No	279/492	0.56	..
PA0706	PP4158	296	1.4e-06	1	PA1636	No	No	No	342/604	0.56	..
PA3740	PP3357	296	1.5e-06	1	PA4899	No	No	No	398/691	0.57	..
PA5024	PP0129	296	2.1e-06	1	PA5487	No	No	No	340/604	0.56	..
PA2735	PP0287	296	2e-05	1	PA5146	No	No	No	344/613	0.56	..
PA0126	PP5227	296	8.7e-07	1	PA5277	No	No	No	314/550	0.57	..
PA3342	PP3467	295	5.7e-06	1	PA4021	No	No	No	453/806	0.56	..
PA2975	PP4052	295	5.1e-06	1	PA2163	No	Yes	No	549/992	0.55	..
PA2632	PP5088	295	1.3e-06	1	PA5050	No	No	No	357/629	0.56	..
PA2199	PP2028	295	3.9e-06	1	PA3074	No	Yes	No	485/881	0.55	..
PA3335	PP2551	295	1.7e-06	1	PA1223	No	No	No	343/599	0.57	..
PA2087	PP3761	295	1.9e-06	1	PA4112	No	No	No	305/533	0.57	..
PA2128	PP4276	295	5.2e-07	1	PA1527	No	No	No	287/488	0.58	..
PA3354	PP4276	294	1.5e-06	1	PA1527	No	No	No	366/636	0.57	..
PA4616	PP0432	294	4.2e-06	1	PA0662	No	No	No	348/633	0.54	..
PA0249	PP1192	294	2.3e-09	1	PA1428	No	No	No	218/366	0.59	..
PA1683	PP1755	294	1.2e-06	1	PA0854	No	Yes	No	342/600	0.57	..
PA3232	PP1058	294	1.7e-06	1	PA0788	No	No	No	290/495	0.58	..
PA0733	PP4860	294	1.7e-06	1	PA0077	No	No	No	394/705	0.55	..
PA2768	PP4235	294	1.2e-08	1	PA2478	No	No	No	228/384	0.59	..
PA5184	PP4842	293	4.8e-07	1	PA4859	No	No	No	323/562	0.57	..
PA2931	PP1676	293	7.7e-07	1	PA1276	No	No	No	289/493	0.58	..
PA2910	PP2812	293	9.3e-07	1	PA3079	No	No	No	301/526	0.57	..
PA3911	PP3324	293	7.2e-08	1	PA5539	No	No	No	243/409	0.59	..
PA0843	PP3950	292	1.9e-06	1	PA1646	No	No	No	244/422	0.57	..
PA5137	PP2024	292	4.5e-06	1	PA4282	No	No	No	312/527	0.59	..
PA3952	PP5257	292	8.8e-07	1	PA1028	No	No	No	310/542	0.57	..
PA1066	PP0804	292	2.4e-06	1	PA1876	No	No	No	272/461	0.59	..
PA3905	PP5133	292	2.8e-07	1	PA0345	No	No	No	240/413	0.58	..
PA3867	PP2120	292	1e-06	1	PA2561	No	No	No	280/482	0.58	..
PA1218	PP4211	291	5.6e-06	1	PA2391	No	No	No	389/696	0.55	..
PA0906	PP0614	291	2.9e-06	1	PA0444	No	No	No	237/411	0.57	..
PA1003	PP2636	291	9e-06	1	PA4807	No	No	No	543/963	0.56	..
PA4584	PP2067	291	4.9e-06	1	PA1236	No	No	No	441/786	0.56	..
PA4075	PP4235	291	5.5e-06	1	PA2478	No	No	No	409/747	0.54	..
PA5329	PP1589	290	2.1e-08	1	PA3658	No	No	No	248/421	0.58	..
PA1195	PP4757	290	4.2e-06	1	PA3760	No	No	No	428/772	0.55	..
PA0527	PP4265	290	1.5e-06	1	PA1544	No	No	No	330/595	0.55	..
PA2368	PP3427	290	1.7e-08	1	PA2495	No	No	No	258/430	0.6	..
PA2696	PP3526	290	5.1e-06	1	PA4184	No	No	No	314/544	0.57	..
PA1884	PP2091	289	1e-06	1	PA1782	No	No	No	293/515	0.56	..
PA2792	PP2558	289	1.7e-06	1	PA3404	No	No	No	225/380	0.59	..
PA2784	PP2068	289	9.9e-07	1	PA1237	No	No	No	323/560	0.57	..
PA3412	PP4488	289	7.4e-09	1	PA0874	No	No	No	133/209	0.63	..
PA3884	PP0927	289	1.8e-08	1	PA3000	No	No	No	211/362	0.58	..
PA5327	PP0778	289	1.4e-05	1	PA0842	No	No	No	355/635	0.55	..
PA1724	PP1255	288	2.4e-06	1	PA0401	No	No	No	312/552	0.56	..
PA5168	PP3343	288	2e-06	1	PA4222	No	Yes	No	334/600	0.55	..
PA3499	PP4695	288	2.6e-08	1	PA4725	No	No	No	200/345	0.57	..
PA1491	PP3131	288	1.6e-05	1	PA4393	No	No	No	590/1083	0.54	..
PA0571	PP3950	288	2.8e-06	1	PA1646	No	No	No	338/585	0.57	..
PA2126	PP4016	288	2.7e-06	1	PA2629	No	No	No	310/552	0.56	..
PA2816	PP3450	288	2.5e-08	1	PA0041	No	No	No	196/321	0.61	..
PA1835	PP1918	287	2.1e-08	1	PA2963	No	No	No	195/325	0.6	..
PA1885	PP1675	287	5.9e-07	1	PA1275	No	No	No	275/481	0.57	..
PA3285	PP0793	287	3.3e-06	1	PA3562	No	No	No	283/493	0.57	..
PA1111	PP1300	286	1.8e-06	1	PA1339	No	No	No	340/596	0.57	..
PA1914	PP4363	286	2e-05	1	PA3346	No	No	No	652/1202	0.54	..
PA2374	PP3999	286	1e-06	1	PA2611	No	No	No	322/560	0.57	..
PA3515	PP1524	286	8.8e-06	1	PA1161	No	No	No	316/545	0.57	..
PA0885	PP2885	286	3.3e-06	1	PA1908	No	Yes	No	244/419	0.58	..
PA4553	PP1459	286	2.1e-06	1	PA3748	No	No	No	316/563	0.56	..
PA1357	PP1125	286	3e-08	1	PA1045	No	No	No	250/440	0.56	..
PA4490	PP4684	285	4.2e-06	1	PA4701	No	No	No	323/567	0.56	..
PA0700	PP1037	285	3.8e-08	1	PA3763	No	No	No	231/387	0.59	..
PA3270	PP4243	285	3.9e-06	1	PA2424	No	No	No	317/555	0.57	..
PA2109	PP2027	285	3e-08	1	PA3075	No	No	No	233/396	0.58	..
PA4127	PP4206	285	8.4e-06	1	PA5370	No	No	No	315/543	0.58	..
PA0174	PP0875	285	3.1e-06	1	PA3424	No	No	No	275/462	0.59	..
PA1729	PP4097	284	9.1e-07	1	PA2584	No	No	No	268/448	0.59	..
PA0556	PP2025	284	2.9e-08	1	PA4281	No	No	No	284/499	0.56	..
PA4742	PP4220	284	1.9e-05	1	PA2402	No	Yes	No	472/838	0.56	..
PA0997	PP5133	284	1.1e-05	1	PA0345	No	Yes	No	456/838	0.54	..
PA5044	PP3599	283	1.4e-05	1	PA3878	No	No	No	347/617	0.56	..
PA5520	PP2029	283	7.4e-06	1	PA3073	No	No	No	405/728	0.55	..
PA2033	PP1759	283	4.1e-06	1	PA0859	No	No	No	309/539	0.57	..
PA4962	PP0313	283	8.9e-07	1	PA5401	No	No	No	299/527	0.56	..
PA0585	PP5138	283	3.7e-07	1	PA1309	No	No	No	283/503	0.56	..
PA2085	PP3275	283	8.2e-08	1	PA2091	No	No	No	231/395	0.58	..
PA1725	PP4243	283	7.9e-06	1	PA2424	No	No	No	365/638	0.57	..
PA5547	PP1589	283	5.8e-06	1	PA3658	No	No	No	365/650	0.56	..
PA1956	PP4613	283	4.2e-08	1	PA3901	No	No	No	255/425	0.6	..
PA3485	PP1525	283	3.1e-08	1	PA1162	No	No	No	247/425	0.58	..
PA0045	PP3478	283	7.7e-06	1	PA1868	No	No	No	385/692	0.55	..
PA4122	PP4147	283	1.1e-05	1	PA1810	No	No	No	389/707	0.55	..
PA3364	PP1507	282	1.1e-05	1	PA3685	No	No	No	366/651	0.56	..
PA1403	PP4211	282	5.6e-06	1	PA2391	No	No	No	344/606	0.56	..
PA3306	PP2848	282	1.9e-06	1	PA4892	No	No	No	230/381	0.6	..
PA2066	PP4929	282	4.1e-06	1	PA4989	No	No	No	366/663	0.55	..
PA0360	PP4785	282	3.1e-06	1	PA3978	No	No	No	168/282	0.59	..
PA4713	PP4235	282	4.2e-08	1	PA2478	No	No	No	262/450	0.58	..
PA0412	PP0892	282	1.3e-05	1	PA4339	No	No	No	392/684	0.57	..
PA1704	PP3188	282	3.5e-08	1	PA3074	No	No	No	248/420	0.59	..
PA0512	PP4947	282	1.4e-06	1	PA0782	No	No	No	284/498	0.57	..
PA4348	PP0147	282	1.1e-05	1	PA5468	No	No	No	350/615	0.56	..
PA3841	PP4762	282	2.3e-05	1	PA3942	No	No	No	366/654	0.55	..
PA4680	PP3755	281	1.4e-06	1	PA1628	No	No	No	293/502	0.58	..
PA0711	PP3563	281	5.3e-07	1	PA1139	No	No	No	245/418	0.58	..
PA0517	PP0793	281	5.5e-08	1	PA3562	No	No	No	195/322	0.6	..
PA4830	PP1246	281	2.5e-06	1	PA1874	No	No	No	213/355	0.6	..
PA2769	PP4013	280	1.1e-08	1	PA2625	No	No	No	230/401	0.57	..
PA3004	PP4198	280	7.4e-06	1	PA2900	No	Yes	No	382/677	0.56	..
PA1701	PP1228	280	5.6e-08	1	PA2654	No	No	No	192/314	0.61	..
PA3696	PP4124	280	1.6e-05	1	PA2642	No	No	No	424/755	0.56	..
PA1216	PP4343	280	1.2e-05	1	PA1453	No	No	No	404/719	0.56	..
PA5123	PP4473	280	3.9e-06	1	PA0904	No	No	No	306/539	0.56	..
PA0724	PP1193	280	1.1e-05	1	PA1874	No	Yes	No	202/347	0.58	..
PA0998	PP3560	279	2e-05	1	PA1309	No	Yes	No	433/777	0.55	..
PA0639	PP4309	279	1.6e-05	1	PA0476	No	No	No	405/720	0.56	..
PA3380	PP3228	279	4e-08	1	PA2595	No	No	No	281/486	0.57	..
PA3727	PP5263	279	1.2e-05	1	PA5295	No	No	No	409/729	0.56	..
PA2146	PP3269	279	2.1e-08	1	PA2190	No	No	No	99/141	0.7	..
PA2301	PP2148	279	4.1e-06	1	PA3002	No	No	No	259/441	0.58	..
PA5073	PP5001	278	5.8e-08	1	PA5054	No	No	No	262/448	0.58	..
PA3476	PP4947	278	9.8e-06	1	PA0782	No	Yes	No	356/628	0.56	..
PA5139	PP4872	277	2.1e-05	1	PA4928	No	No	No	381/674	0.56	..
PA1089	PP1725	277	5.2e-06	1	PA3251	No	No	No	325/581	0.55	..
PA3720	PP4371	277	6.9e-06	1	PA1099	No	No	No	323/575	0.56	..
PA3693	PP0495	277	2.1e-06	1	PA2253	No	No	No	285/503	0.56	..
PA2052	PP1626	277	8.1e-08	1	PA3620	No	Yes	No	255/440	0.57	..
PA1966	PP3188	276	6.5e-08	1	PA3074	No	No	No	206/351	0.58	..
PA4121	PP2336	276	1.6e-05	1	PA0794	No	No	No	334/594	0.56	..
PA4917	PP3075	276	9.2e-06	1	PA2005	No	No	No	254/438	0.57	..
PA3994	PP2425	276	2.2e-05	1	PA2276	No	No	No	222/375	0.59	..
PA1715	PP5111	276	7.5e-08	1	PA0373	No	No	No	244/411	0.59	..
PA1134	PP3177	276	2.8e-06	1	PA1050	No	No	No	268/471	0.56	..
PA5525	PP1992	276	1.5e-05	1	PA3116	No	No	No	418/735	0.56	..
PA3489	PP4512	276	5.4e-06	1	PA3222	No	No	No	292/522	0.55	..
PA0907	PP1708	276	2.1e-06	1	PA3128	No	No	No	228/387	0.58	..
PA5120	PP0255	275	1.7e-08	1	PA5182	No	No	No	201/337	0.59	..
PA4384	PP3721	275	1.5e-05	1	PA4976	No	No	No	179/283	0.63	..
PA0839	PP5242	275	1.3e-05	1	PA2424	No	No	No	219/352	0.62	..
PA2675	PP3476	275	2.1e-08	1	PA3100	No	No	No	165/262	0.62	..
PA4437	PP3455	275	3.6e-05	1	PA2019	No	No	No	421/754	0.55	..
PA0884	PP0672	275	5.6e-05	1	PA4601	No	Yes	No	561/1015	0.55	..
PA5208	PP5222	275	2.1e-05	1	PA5272	No	No	No	303/520	0.58	..
PA1062	PP2547	275	2.5e-06	1	PA1570	No	No	No	277/487	0.56	..
PA1845	PP2702	275	3e-06	1	PA4844	No	No	No	291/502	0.57	..
PA3248	PP0820	275	1.4e-06	1	PA1472	No	No	No	293/529	0.55	..
PA2804	PP0988	275	1.1e-05	1	PA2445	No	No	No	301/526	0.57	..
PA0678	PP1052	274	2.7e-08	1	PA0246	No	No	No	272/464	0.58	..
PA4183	PP0696	274	6.2e-08	1	PA4679	No	No	No	230/392	0.58	..
PA2899	PP2675	274	4.8e-08	1	PA1983	No	No	No	256/440	0.58	..
PA2136	PP2068	274	4.3e-06	1	PA1237	No	No	No	278/470	0.59	..
PA4815	PP0101	274	9.4e-08	1	PA0103	No	No	No	214/359	0.59	..
PA1878	PP0553	274	8.1e-06	1	PA4152	No	No	No	274/461	0.59	..
PA2538	PP4890	274	8.2e-08	1	PA4939	No	No	No	260/446	0.58	..
PA5517	PP4263	274	4.6e-06	1	PA1547	No	No	No	324/569	0.56	..
PA2285	PP4952	274	1.7e-05	1	PA0455	No	No	No	370/668	0.55	..
PA1723	PP4219	273	3.9e-05	1	PA2424	No	No	No	409/735	0.55	..
PA3490	PP4243	273	1.4e-05	1	PA2424	No	No	No	333/580	0.57	..
PA3377	PP1728	273	4.9e-05	1	PA5121	No	No	No	321/564	0.56	..
PA0055	PP4404	273	3.3e-06	1	PA2250	No	No	No	291/516	0.56	..
PA3518	PP0620	273	3e-05	1	PA1373	No	No	No	411/729	0.56	..
PA2105	PP0840	273	1.3e-05	1	PA3816	No	No	No	177/291	0.6	..
PA2995	PP4949	272	1.6e-05	1	PA2529	No	No	No	296/529	0.55	..
PA4773	PP0787	272	8.2e-07	1	PA4524	No	No	No	240/412	0.58	..
PA5246	PP1626	272	2.7e-07	1	PA3620	No	No	No	278/493	0.56	..
PA2578	PP2045	272	1.1e-05	1	PA0740	No	No	No	276/475	0.58	..
PA2996	PP2067	272	2.4e-05	1	PA1236	No	No	No	306/544	0.56	..
PA0351	PP0988	272	2.8e-07	1	PA2445	No	No	No	278/469	0.59	..
PA1415	PP0751	272	3e-05	1	PA4640	No	No	No	314/562	0.55	..
PA0618	PP4221	272	6.5e-05	1	PA2400	No	No	No	327/588	0.55	..
PA1712	PP2316	271	1.5e-07	1	PA2858	No	No	No	187/311	0.6	..
PA0522	PP1740	271	1.3e-07	1	PA1163	No	No	No	149/233	0.63	..
PA1393	PP1304	271	1.7e-05	1	PA4442	No	Yes	No	251/443	0.56	..
PA4487	PP3403	271	2.8e-05	1	PA2418	No	No	No	405/716	0.56	..
PA2537	PP0774	271	2.3e-05	1	PA0835	No	No	No	255/425	0.6	..
PA2885	PP4243	270	2.6e-05	1	PA2424	No	No	No	334/591	0.56	..
PA0850	PP1520	270	1.7e-07	1	PA3673	No	No	No	258/444	0.58	..
PA4059	PP1655	270	1.4e-07	1	PA0933	No	No	No	230/390	0.58	..
PA0830	PP1713	270	3.8e-05	1	PA0152	No	No	No	322/564	0.57	..
PA2869	PP0554	270	2.2e-06	1	PA4151	No	No	No	230/381	0.6	..
PA3018	PP4158	270	3.7e-05	1	PA1636	No	No	No	358/639	0.56	..
PA1891	PP4263	269	7.3e-08	1	PA1547	No	No	No	241/406	0.59	..
PA0171	PP0793	269	1.5e-05	1	PA3562	No	No	No	253/424	0.59	..
PA3904	PP1897	269	1.8e-07	1	PA2984	No	No	No	213/364	0.58	..
PA1928	PP4988	269	2.1e-05	1	PA0413	No	No	No	321/580	0.55	..
PA3796	PP5067	269	2.4e-05	1	PA5022	No	No	No	303/526	0.57	..
PA2234	PP3282	268	5.4e-05	1	PA1628	No	No	No	412/740	0.55	..
PA0638	PP4952	268	3.9e-05	1	PA0455	No	No	No	390/698	0.55	..
PA2593	PP0804	268	2.2e-05	1	PA1876	No	No	No	310/533	0.58	..
PA5205	PP3272	268	4.2e-05	1	PA3234	No	No	No	404/713	0.56	..
PA4205	PP2502	268	1.3e-07	1	PA1328	No	No	No	248/428	0.57	..
PA1367	PP0693	268	7.9e-05	1	PA4686	No	No	No	440/779	0.56	..
PA1806	PP3612	267	7.6e-05	1	PA1322	No	Yes	No	347/621	0.55	..
PA2159	PP4338	267	2.2e-07	1	PA1458	No	No	No	237/399	0.59	..
PA1618	PP4211	267	1.9e-07	1	PA2391	No	No	No	235/402	0.58	..
PA1234	PP0586	267	9.3e-06	1	PA3920	No	No	No	289/498	0.58	..
PA4345	PP5340	267	2e-05	1	PA1409	No	No	No	277/480	0.57	..
PA4798	PP2561	267	7.2e-05	1	PA2424	No	No	No	427/762	0.56	..
PA3032	PP1993	267	0.00022	1	PA3115	No	No	No	405/735	0.55	..
PA1542	PP5112	267	7e-05	1	PA0372	No	No	No	359/627	0.57	..
PA0475	PP5269	266	1.9e-05	1	PA5302	No	No	No	334/583	0.57	..
PA1763	PP1335	266	0.00012	1	PA4414	No	No	No	382/691	0.55	..
PA0431	PP5302	266	2.3e-05	1	PA5338	No	No	No	266/460	0.57	..
PA0806	PP4910	266	2.1e-07	1	PA4961	No	No	No	160/265	0.6	..
PA1817	PP2998	266	1.6e-07	1	PA4397	No	No	No	190/313	0.6	..
PA2896	PP5187	266	2.6e-05	1	PA5209	No	No	No	330/595	0.55	..
PA4649	PP1200	266	1.7e-05	1	PA0917	No	No	No	312/553	0.56	..
PA1913	PP0337	266	5.7e-05	1	PA5017	No	No	No	246/418	0.58	..
PA1283	PP2824	266	1e-05	1	PA0167	No	No	No	294/520	0.56	..
PA5211	PP1259	266	2.2e-07	1	PA0129	No	No	No	240/412	0.58	..
PA0293	PP3091	265	0.00013	1	PA1669	No	Yes	No	228/404	0.56	..
PA0514	PP0672	265	2e-05	1	PA4601	No	Yes	No	295/521	0.56	..
PA1700	PP4137	265	2.7e-07	1	PA4168	No	No	No	207/341	0.6	..
PA1427	PP5120	265	2.5e-05	1	PA0366	No	No	No	289/515	0.56	..
PA1036	PP4328	265	2.5e-05	1	PA1474	No	No	No	299/518	0.57	..
PA1057	PP0243	265	1.6e-05	1	PA5203	No	No	No	287/497	0.57	..
PA5264	PP2430	264	8.9e-05	1	PA2917	No	No	No	300/522	0.57	..
PA3352	PP3717	264	2.5e-06	1	PA4806	No	No	No	232/396	0.58	..
PA3368	PP2228	264	5.8e-05	1	PA1056	No	No	No	310/552	0.56	..
PA1124	PP2102	264	5e-05	2	PA3043	No	Yes	No	484/870	0.55	..
PA4623	PP4845	263	1.5e-07	1	PA4862	No	No	No	205/334	0.61	..
PA0253	PP1047	263	6.2e-06	1	PA3103	No	No	No	195/328	0.59	..
PA1401	PP5069	263	6.5e-08	1	PA5240	No	No	No	237/406	0.58	..
PA1653	PP3550	263	3.4e-07	1	PA5386	No	No	No	213/361	0.59	..
PA1630	PP4613	263	0.00014	1	PA3901	No	No	No	429/772	0.55	..
PA3318	PP4059	263	1.7e-05	1	PA2152	No	No	No	213/358	0.59	..
PA2956	PP3503	262	0.00014	1	PA1945	No	No	No	228/389	0.58	..
PA2829	PP4219	262	4.5e-07	1	PA2424	No	No	No	264/458	0.57	..
PA0537	PP2068	262	4.7e-05	1	PA1237	No	No	No	324/572	0.56	..
PA0515	PP0695	262	3.1e-07	1	PA4684	No	No	No	246/419	0.58	..
PA0358	PP2799	262	3.9e-05	1	PA0299	No	No	No	254/443	0.57	..
PA0679	PP1487	262	1.6e-07	1	PA3712	No	No	No	208/353	0.58	..
PA3067	PP5190	262	3.5e-07	1	PA5210	No	No	No	194/329	0.58	..
PA3684	PP2046	262	2.4e-07	1	PA5189	No	No	No	126/197	0.63	..
PA2312	PP5206	262	3.2e-05	1	PA5232	No	No	No	276/470	0.58	..
PA1573	PP2386	262	3.1e-05	1	PA3901	No	No	No	173/296	0.58	..
PA2048	PP2028	261	3.9e-07	1	PA3074	No	No	No	225/387	0.58	..
PA2455	PP1193	261	9.8e-06	1	PA1874	No	No	No	167/285	0.58	..
PA2793	PP3220	261	0.00022	1	PA2061	No	No	No	451/801	0.56	..
PA1206	PP0256	261	8.9e-06	1	PA5181	No	No	No	229/396	0.57	..
PA1149	PP1325	260	4.4e-07	1	PA4423	No	No	No	160/278	0.57	..
PA1191	PP0080	260	2.3e-05	1	PA2176	No	No	No	234/403	0.58	..
PA0731	PP4967	260	0.0001	1	PA0546	No	No	No	296/514	0.57	..
PA1241	PP5207	260	5.4e-05	1	PA5231	No	No	No	316/553	0.57	..
PA4828	PP4131	260	2e-06	1	PA2649	No	No	No	274/475	0.57	..
PA5042	PP4652	260	6.4e-05	1	PA4622	No	No	No	134/214	0.62	..
PA0578	PP4696	260	4e-07	1	PA4726	No	No	No	272/472	0.57	..
PA3469	PP5185	260	3.5e-05	1	PA5204	No	No	No	210/355	0.59	..
PA0802	PP1728	260	4.6e-07	1	PA5121	No	No	No	196/328	0.59	..
PA1721	PP4276	260	5.1e-07	1	PA1527	No	No	No	242/421	0.57	..
PA0013	PP4263	259	4.6e-05	1	PA1547	No	No	No	365/650	0.56	..
PA0116	PP0239	259	7.1e-06	1	PA3443	No	No	No	255/434	0.58	..
PA1639	PP4328	259	7.3e-05	1	PA1474	No	No	No	315/551	0.57	..
PA2579	PP4729	258	0.00022	1	PA4763	No	Yes	No	292/513	0.56	..
PA4863	PP3355	258	2.2e-06	1	PA3589	No	No	No	260/450	0.57	..
PA0726	PP2852	258	0.00047	1	PA1115	No	No	No	376/675	0.55	..
PA1559	PP4638	258	0.00014	1	PA0088	No	No	No	416/744	0.55	..
PA1560	PP1655	258	4.8e-07	1	PA0933	No	No	No	208/354	0.58	..
PA1132	PP3483	258	0.00013	1	PA3103	No	No	No	342/615	0.55	..
PA3908	PP0557	258	0.00015	1	PA4147	No	No	No	346/627	0.55	..
PA4169	PP2325	258	3.8e-07	1	PA1752	No	No	No	264/447	0.59	..
PA4704	PP4779	257	0.0002	1	PA3970	No	No	No	259/448	0.57	..
PA4712	PP1403	257	4.3e-05	1	PA1726	No	No	No	239/415	0.57	..
PA3855	PP4274	257	0.00017	1	PA1529	No	No	No	325/553	0.58	..
PA3363	PP4243	257	0.00011	1	PA2424	No	No	No	337/586	0.57	..
PA2692	PP5128	257	4.8e-05	1	PA0353	No	No	No	287/496	0.57	..
PA4325	PP1905	257	6.9e-07	1	PA2976	No	No	No	245/406	0.6	..
PA1014	PP2547	257	0.00021	1	PA1570	No	No	No	285/490	0.58	..
PA3410	PP4244	257	9e-06	1	PA2426	No	No	No	229/409	0.55	..
PA4081	PP3272	257	0.0004	1	PA3234	No	No	No	247/430	0.57	..
PA4220	PP4263	257	2.8e-07	1	PA1547	No	No	No	181/289	0.62	..
PA0948	PP0197	256	2.2e-07	1	PA5251	No	No	No	238/401	0.59	..
PA3458	PP3946	256	1.8e-06	1	PA1603	No	No	No	232/410	0.56	..
PA4799	PP1894	256	3.5e-05	1	PA2813	No	No	No	288/506	0.56	..
PA0803	PP1181	256	3.2e-07	1	PA1157	No	No	No	182/299	0.6	..
PA0630	PP1195	256	6.6e-07	1	PA3573	No	No	No	152/248	0.61	..
PA0698	PP3946	256	2.2e-06	1	PA1603	No	No	No	228/386	0.59	..
PA4009	PP2208	256	0.00017	1	PA1311	No	No	No	352/623	0.56	..
PA0100	PP4227	256	2.4e-05	1	PA2480	No	No	No	272/467	0.58	..
PA1392	PP0387	256	0.00054	1	PA0576	No	No	No	348/620	0.56	..
PA1129	PP3492	256	5.5e-07	1	PA2552	No	No	No	220/365	0.6	..
PA2313	PP3083	255	8.4e-05	1	PA1735	No	No	No	339/603	0.56	..
PA4499	PP2868	255	3.1e-05	1	PA4987	No	No	No	199/342	0.58	..
PA4118	PP1493	255	7e-05	1	PA3703	No	No	No	245/414	0.59	..
PA0251	PP4243	255	0.00019	1	PA2424	No	No	No	367/651	0.56	..
PA1696	PP0180	255	2.6e-05	1	PA5248	No	No	No	217/363	0.59	..
PA3557	PP3221	255	5e-07	1	PA4504	No	No	No	209/351	0.59	..
PA1892	PP1827	255	0.00015	1	PA1678	No	No	No	203/345	0.58	..
PA3021	PP3531	255	2.6e-07	1	PA1579	No	No	No	221/378	0.58	..
PA1906	PP1524	255	4.2e-05	1	PA1161	No	No	No	217/369	0.58	..
PA4580	PP0916	255	3.1e-05	1	PA4365	No	No	No	235/390	0.6	..
PA4577	PP4158	255	8.2e-07	1	PA1636	No	No	No	171/285	0.6	..
PA3732	PP5185	255	6.5e-07	1	PA5204	No	No	No	235/393	0.59	..
PA5081	PP2259	255	2.5e-05	1	PA4021	No	No	No	199/324	0.61	..
PA2746	PP4524	255	6.7e-07	1	PA1418	No	No	No	167/282	0.59	..
PA5157	PP0703	255	1.5e-05	1	PA0471	No	No	No	181/297	0.6	..
PA4784	PP1307	254	2.4e-06	1	PA4508	No	No	No	98/148	0.66	..
PA4795	PP3646	254	7.7e-07	1	PA3504	No	No	No	152/256	0.59	..
PA2861	PP0767	254	9.9e-05	1	PA3921	No	No	No	240/403	0.59	..
PA1836	PP3949	254	4.8e-05	1	PA0243	No	No	No	288/508	0.56	..
PA1702	PP2791	254	6.7e-07	1	PA0345	No	No	No	160/253	0.63	..
PA4630	PP0320	254	2.5e-06	1	PA4633	No	No	No	196/328	0.59	..
PA2185	PP1256	254	0.00035	1	PA1253	No	No	No	263/485	0.54	..
PA0513	PP4830	254	2.1e-06	1	PA2907	No	No	No	244/427	0.57	..
PA2141	PP3428	253	8.5e-05	1	PA0049	No	No	No	283/494	0.57	..
PA2636	PP2819	253	9.7e-05	1	PA4597	No	No	No	269/473	0.56	..
PA1332	PP1105	253	0.0001	1	PA4226	No	No	No	305/542	0.56	..
PA1167	PP3019	253	0.00012	1	PA4802	No	No	No	321/560	0.57	..
PA0052	PP0539	252	6.2e-07	1	PA4030	No	No	No	240/408	0.58	..
PA4071	PP2643	252	0.00014	1	PA1251	No	No	No	336/582	0.57	..
PA4552	PP4243	252	0.0005	1	PA2424	No	No	No	398/723	0.55	..
PA4875	PP0804	252	1.1e-06	1	PA1876	No	No	No	180/288	0.62	..
PA1994	PP1273	252	0.00012	1	PA2837	No	No	No	148/240	0.61	..
PA1466	PP1183	252	0.00013	1	PA1165	No	No	No	376/687	0.54	..
PA4801	PP2669	252	7.5e-07	1	PA4571	No	No	No	184/297	0.61	..
PA0343	PP4158	252	0.00041	1	PA1636	No	No	No	376/666	0.56	..
PA5444	PP3331	252	9.5e-07	1	PA0435	No	No	No	184/315	0.58	..
PA3960	PP5161	252	7.6e-07	1	PA0308	No	No	No	196/321	0.61	..
PA4551	PP0724	252	4.8e-05	1	PA4668	No	No	No	294/510	0.57	..
PA1323	PP1075	252	9.5e-07	1	PA3582	No	No	No	152/252	0.6	..
PA0908	PP3221	251	7.8e-07	1	PA4504	No	No	No	213/367	0.58	..
PA1228	PP3069	251	1.2e-06	1	PA1973	No	No	No	125/193	0.64	..
PA3956	PP4965	251	1.2e-06	1	PA0548	No	No	No	235/412	0.57	..
PA3056	PP2316	251	5e-05	1	PA2858	No	No	No	257/442	0.58	..
PA0742	PP4304	251	7e-07	1	PA1496	No	No	No	103/151	0.68	..
PA3034	PP0260	251	4.2e-05	1	PA5176	No	No	No	237/400	0.59	..
PA0663	PP1675	251	0.00022	1	PA1275	No	No	No	327/589	0.55	..
PA3907	PP3357	251	0.00036	1	PA4899	No	No	No	315/562	0.56	..
PA0611	PP5032	250	0.0004	1	PA5098	No	No	No	342/617	0.55	..
PA0094	PP1128	250	9.6e-07	1	PA1048	No	No	No	196/332	0.59	..
PA0215	PP2210	250	8.2e-07	1	PA1309	No	Yes	No	228/392	0.58	..
PA4796	PP3592	249	3.5e-05	1	PA5121	No	No	No	263/459	0.57	..
PA0570	PP3507	249	1.6e-06	1	PA2944	No	No	No	193/330	0.58	..
PA4683	PP2673	249	0.00011	1	PA1981	No	No	No	187/309	0.6	..
PA0909	PP4276	249	1.6e-06	1	PA1527	No	No	No	157/252	0.62	..
PA1929	PP4759	249	8.2e-07	1	PA2355	No	No	No	167/273	0.61	..
PA1383	PP2185	248	0.0024	1	PA1779	No	No	No	830/1558	0.53	..
PA2436	PP3478	248	7.8e-06	1	PA1868	No	No	No	236/406	0.58	..
PA3519	PP1438	248	0.00045	1	PA2523	No	No	No	278/490	0.56	..
PA1173	PP2337	248	8.1e-05	1	PA0793	No	No	No	222/385	0.57	..
PA0817	PP4158	247	1.9e-06	1	PA1636	No	No	No	209/347	0.6	..
PA2173	PP3564	246	1.4e-06	1	PA0893	No	No	No	206/354	0.58	..
PA1324	PP4217	246	0.00018	1	PA4168	No	No	No	244/420	0.58	..
PA0234	PP1037	246	0.00091	1	PA3763	No	No	No	382/699	0.54	..
PA2559	PP1626	246	0.00024	1	PA3620	No	No	No	312/552	0.56	..
PA4114	PP1246	246	0.00016	1	PA1874	No	No	No	268/471	0.56	..
PA0474	PP2889	246	1.1e-06	1	PA2110	No	No	No	206/345	0.59	..
PA3971	PP1182	246	9.2e-06	1	PA1158	No	No	No	250/438	0.57	..
PA2774	PP1868	245	0.00034	1	PA2840	No	No	No	249/436	0.57	..
PA2655	PP5004	245	1.4e-06	1	PA5057	No	No	No	149/250	0.59	..
PA0765	PP2068	245	5.8e-05	1	PA1237	No	No	No	271/469	0.57	..
PA0483	PP3222	244	3.6e-05	1	PA4503	No	No	No	232/404	0.57	..
PA2764	PP2025	244	0.00056	1	PA4281	No	No	No	318/572	0.55	..
PA3289	PP3201	244	1.9e-06	1	PA3080	No	No	No	214/359	0.59	..
PA1355	PP2637	244	1.9e-06	1	PA0072	No	No	No	154/254	0.6	..
PA2218	PP4000	244	0.0014	1	PA2612	No	No	No	452/815	0.55	..
PA0048	PP3910	244	1.1e-06	1	PA2322	No	No	No	218/380	0.57	..
PA1887	PP1695	244	0.00067	1	PA3271	No	No	No	268/473	0.56	..
PA2120	PP4895	243	1.4e-05	1	PA4945	No	No	No	233/402	0.57	..
PA4146	PP1287	243	2.5e-06	1	PA3541	No	No	No	219/387	0.56	..
PA3967	PP2757	243	1.9e-06	1	PA4772	No	No	No	179/303	0.59	..
PA0216	PP2035	243	2.7e-06	2	PA1651	No	Yes	No	239/420	0.56	..
PA1757	PP5063	243	0.00048	1	PA5373	No	Yes	No	281/498	0.56	..
PA1482	PP3225	243	8.7e-05	1	PA3896	No	No	No	243/417	0.58	..
PA4125	PP4597	242	2.2e-06	1	PA3870	No	No	No	210/361	0.58	..
PA1398	PP4947	242	3.4e-06	1	PA0782	No	No	No	210/355	0.59	..
PA3880	PP2534	242	2e-06	1	PA3124	No	No	No	216/373	0.57	..
PA1118	PP4546	242	0.0009	1	PA3297	No	No	No	232/403	0.57	..
PA1722	PP4059	242	3.3e-06	1	PA2152	No	No	No	194/325	0.59	..
PA5190	PP1271	242	0.00051	1	PA2835	No	No	No	304/535	0.56	..
PA5381	PP4211	242	2.7e-06	1	PA2391	No	No	No	182/310	0.58	..
PA3576	PP1202	242	9.6e-06	1	PA0920	No	No	No	246/415	0.59	..
PA1325	PP2021	242	2.4e-06	1	PA4204	No	No	No	184/307	0.59	..
PA0987	PP0264	241	0.0014	1	PA5165	No	No	No	343/608	0.56	..
PA4095	PP0693	241	0.00042	1	PA4686	No	No	No	279/482	0.57	..
PA5013	PP2762	241	0.0014	1	PA2324	No	Yes	No	297/533	0.55	..
PA0493	PP5346	241	3.2e-06	1	PA5435	No	No	No	141/227	0.62	..
PA2575	PP1705	240	0.00073	1	PA1781	No	No	No	312/540	0.57	..
PA0992	PP5250	240	0.00063	1	PA2700	No	No	No	328/579	0.56	..
PA1746	PP1340	240	0.00022	1	PA4409	No	No	No	236/417	0.56	..
PA2674	PP1050	239	8e-07	1	PA3281	No	No	No	183/310	0.59	..
PA1358	PP0516	239	3.3e-06	1	PA4054	No	No	No	203/355	0.57	..
PA1347	PP2130	239	0.0011	1	PA3020	No	No	No	281/517	0.54	..
PA3399	PP5101	238	3.7e-06	1	PA0386	No	No	No	190/320	0.59	..
PA5083	PP4290	238	4e-06	1	PA1507	No	No	No	210/350	0.6	..
PA1348	PP3490	238	0.0016	1	PA0041	No	No	No	258/455	0.56	..
PA2184	PP3529	238	0.00039	1	PA2326	No	No	No	244/422	0.57	..
PA1897	PP2688	238	0.0014	1	PA1730	No	No	No	272/467	0.58	..
PA0033	PP0287	238	4.7e-06	1	PA5146	No	No	No	210/356	0.58	..
PA1468	PP4824	237	3.3e-05	1	PA4856	No	No	No	175/297	0.58	..
PA3721	PP2387	237	0.00092	1	PA5025	No	No	No	361/648	0.55	..
PA3566	PP3425	237	4.3e-06	1	PA2493	No	No	No	163/264	0.61	..
PA3203	PP3467	237	5e-06	1	PA4021	No	No	No	189/315	0.6	..
PA1761	PP1125	237	0.00014	1	PA1045	No	No	#N/A	219/375	0.58	..
PA0568	PP2836	237	0.0002	1	PA3327	No	No	No	191/324	0.58	..
PA3730	PP2546	236	4.4e-06	1	PA3386	No	No	No	178/295	0.6	..
PA2396	PP4276	236	0.0026	1	PA1527	No	No	No	446/829	0.53	..
PA4697	PP2905	236	0.00021	1	PA1795	No	No	No	238/409	0.58	..
PA5551	PP5111	236	0.00051	1	PA0373	No	No	No	268/472	0.56	..
PA1967	PP5112	236	0.00045	1	PA0372	No	No	No	254/454	0.55	..
PA0880	PP2568	235	1.2e-06	1	PA2546	No	No	No	183/314	0.58	..
PA3362	PP3095	235	0.00074	1	PA0090	No	No	No	229/404	0.56	..
PA1353	PP3099	235	3.4e-05	1	PA2366	No	No	No	209/347	0.6	..
PA3428	PP2024	235	7e-06	1	PA4282	No	No	No	165/272	0.6	..
PA3786	PP4067	235	6.2e-06	1	PA2012	No	No	No	223/383	0.58	..
PA2672	PP2691	234	0.0012	1	PA2135	No	No	No	174/294	0.59	..
PA3178	PP2390	234	4.9e-06	1	PA5293	No	No	No	222/375	0.59	..
PA2801	PP3146	234	6e-06	1	PA5309	No	No	No	166/270	0.61	..
PA2046	PP3090	234	1.5e-05	1	PA0077	No	No	No	176/294	0.59	..
PA5540	PP1144	234	0.0011	1	PA3311	No	No	No	220/375	0.58	..
PA2457	PP1681	233	0.0026	1	PA1281	No	No	No	305/541	0.56	..
PA0569	PP3182	233	0.00053	1	PA5442	No	No	No	249/439	0.56	..
PA4178	PP1035	233	0.00026	1	PA3767	No	No	No	247/448	0.55	..
PA0914	PP3426	233	8.5e-06	1	PA2494	No	No	No	193/319	0.6	..
PA1354	PP3601	233	0.00016	1	PA4225	No	No	No	229/391	0.58	..
PA2504	PP4764	233	0.0012	1	PA2008	No	No	No	319/562	0.56	..
PA3793	PP1230	233	7.1e-06	1	PA2077	No	No	No	205/343	0.59	..
PA4364	PP1236	233	2.7e-06	1	PA1009	No	No	No	235/412	0.57	..
PA2137	PP3001	233	0.00087	1	PA3733	No	No	No	217/370	0.58	..
PA0433	PP2325	233	0.00017	1	PA1752	No	No	No	233/415	0.56	..
PA0099	PP3222	233	0.0042	1	PA4503	No	No	No	399/754	0.52	..
PA4471	PP2579	232	8.3e-06	1	PA4517	No	No	No	152/245	0.62	..
PA5404	PP5251	232	1.6e-05	1	PA2701	No	No	No	198/320	0.61	..
PA1844	PP1292	232	9.6e-05	1	PA3918	No	No	No	176/299	0.58	..
PA4536	PP5120	232	0.00036	1	PA0366	No	No	No	210/359	0.58	..
PA0529	PP0346	231	0.0017	1	PA5007	No	No	No	381/678	0.56	..
PA0619	PP0554	231	0.00097	1	PA4151	No	No	No	271/480	0.56	..
PA4173	PP1875	230	1.1e-05	1	PA2824	No	No	No	178/307	0.57	..
PA1666	PP4327	230	0.00053	1	PA1475	No	No	No	226/388	0.58	..
PA1939	PP0184	230	0.015	1	PA5263	No	No	No	278/499	0.55	..
PA5126	PP3815	230	0.00052	1	PA0605	No	No	No	238/427	0.55	..
PA5305	PP2367	230	8.8e-06	1	PA4355	No	No	No	182/298	0.61	..
PA1126	PP1137	230	0.0011	1	PA1070	No	No	No	284/505	0.56	..
PA5402	PP4158	230	0.0019	1	PA1636	No	No	No	208/352	0.59	..
PA1114	PP4964	230	8.3e-06	1	PA0551	No	No	No	156/262	0.59	..
PA4590	PP2412	229	0.00067	1	PA5028	No	No	No	195/332	0.58	..
PA1720	PP0724	229	5.3e-06	1	PA4668	No	No	No	199/335	0.59	..
PA0911	PP3352	229	0.00063	1	PA0183	No	No	No	273/470	0.58	..
PA2024	PP4328	229	0.00028	1	PA1474	No	No	No	251/443	0.56	..
PA2894	PP1483	229	0.00022	1	PA3608	No	No	No	211/359	0.58	..
PA3488	PP5258	229	0.0033	1	PA1027	No	No	No	181/296	0.61	..
PA4650	PP2420	229	0.0018	1	PA2911	No	No	No	281/503	0.55	..
PA5533	PP0339	229	1.2e-05	1	PA5015	No	No	No	199/341	0.58	..
PA4048	PP1766	229	0.0023	1	PA3169	No	No	No	341/608	0.56	..
PA0694	PP3602	229	0.00025	1	PA2217	No	No	No	173/290	0.59	..
PA0680	PP0634	228	2.6e-06	1	PA4525	No	No	No	208/360	0.57	..
PA3295	PP0214	228	0.00047	1	PA0266	No	No	No	250/441	0.56	..
PA2779	PP1359	228	7e-06	1	PA4387	No	No	No	168/279	0.6	..
PA4999	PP4013	228	0.0013	1	PA2625	No	No	No	200/336	0.59	..
PA4093	PP2547	228	0.00019	1	PA1570	No	No	No	222/378	0.58	..
PA1250	PP2027	228	1.2e-05	1	PA3075	No	No	No	160/267	0.59	..
PA1842	PP1013	228	1.2e-05	1	PA3191	No	No	No	192/333	0.57	..
PA1900	PP0147	227	0.0012	1	PA5468	No	Yes	No	241/418	0.57	..
PA2753	PP0514	227	1.2e-05	1	PA4056	No	No	No	191/325	0.58	..
PA4881	PP1986	227	7e-06	1	PA3120	No	No	No	207/355	0.58	..
PA1306	PP4716	227	0.00087	1	PA4749	No	No	No	213/364	0.58	..
PA2670	PP3427	227	0.0077	1	PA2495	No	No	No	507/925	0.54	..
PA1203	PP1626	227	0.00021	1	PA3620	No	No	No	191/328	0.58	..
PA0042	PP4988	227	3.3e-05	1	PA0413	No	No	No	177/301	0.58	..
PA0481	PP1105	227	0.00069	1	PA4226	No	No	No	247/424	0.58	..
PA2230	PP1475	227	0.0034	1	PA3733	No	No	No	277/493	0.56	..
PA2145	PP5194	227	5.8e-05	1	PA5215	No	No	No	195/334	0.58	..
PA2702	PP2766	227	0.00098	1	PA2984	No	No	No	195/325	0.6	..
PA2919	PP3569	226	1.7e-05	1	PA2290	No	No	No	160/263	0.6	..
PA2288	PP1650	226	1.7e-05	1	PA0928	No	No	No	174/290	0.6	..
PA0210	PP1285	226	1.5e-05	1	PA3543	No	Yes	No	154/254	0.6	..
PA1030	PP1505	226	0.0062	1	PA3687	No	No	No	402/740	0.54	..
PA4452	PP1217	226	1.3e-05	1	PA0967	No	No	No	168/287	0.58	..
PA1172	PP4695	226	0.0036	1	PA4725	No	No	No	314/566	0.55	..
PA1707	PP2096	226	0.0019	1	PA3048	No	No	No	198/335	0.59	..
PA2274	PP0732	226	1.4e-05	1	PA4666	No	No	No	218/368	0.59	..
PA4702	PP0210	226	1.2e-05	1	PA2293	No	No	No	180/293	0.61	..
PA0269	PP2394	225	0.00095	1	PA4489	No	No	No	181/297	0.6	..
PA0673	PP4243	225	2.2e-05	1	PA2424	No	No	No	193/315	0.61	..
PA2581	PP5264	225	0.012	1	PA5296	No	No	No	453/828	0.54	..
PA4550	PP4384	225	0.0011	1	PA1083	No	No	No	177/297	0.59	..
PA2703	PP1649	225	1.4e-05	1	PA0927	No	No	No	157/252	0.62	..
PA0938	PP0938	225	0.019	1	PA4476	No	No	No	457/837	0.54	..
PA4820	PP4813	224	1.7e-05	1	PA4011	No	No	No	118/187	0.63	..
PA1841	PP2016	224	0.0014	1	PA3084	No	No	No	252/451	0.55	..
PA2786	PP0724	224	0.00072	1	PA4668	No	No	No	234/418	0.55	..
PA2282	PP3746	223	0.00073	1	PA5354	No	No	No	225/383	0.58	..
PA1606	PP4220	223	0.0023	1	PA2402	No	No	No	253/449	0.56	..
PA2082	PP2100	223	0.0022	1	PA3946	No	No	No	257/449	0.57	..
PA5328	PP0572	223	6.9e-05	1	PA1973	No	No	No	137/224	0.61	..
PA2364	PP3620	223	0.002	1	PA1926	No	No	No	221/371	0.59	..
PA4294	PP0593	223	0.0011	1	PA0168	No	No	No	237/416	0.56	..
PA1298	PP0516	223	1.8e-05	1	PA4054	No	No	No	149/245	0.6	..
PA2030	PP4369	223	2.1e-05	1	PA1101	No	No	No	119/191	0.62	..
PA3332	PP0988	223	0.00092	1	PA2445	No	No	No	219/383	0.57	..
PA2221	PP2156	223	0.015	1	PA2986	No	No	No	585/1073	0.54	..
PA4603	PP2028	223	2.1e-05	1	PA3074	No	No	No	193/314	0.61	..
PA1705	PP5120	223	2e-05	1	PA0366	No	No	No	175/287	0.6	..
PA1751	PP1202	222	2.6e-05	1	PA0920	No	No	No	180/315	0.57	..
PA0942	PP0838	222	0.0028	1	PA3818	No	No	No	308/549	0.56	..
PA0989	PP0339	222	0.0046	1	PA5015	No	No	No	198/348	0.56	..
PA1784	PP1002	222	0.0069	1	PA5170	No	No	No	330/591	0.55	..
PA0727	PP1421	221	0.022	1	PA0757	No	No	No	525/973	0.53	..
PA2193	PP5134	221	2.4e-05	1	PA0344	No	No	No	145/238	0.6	..
PA1389	PP3722	221	0.025	1	PA4930	No	No	No	431/787	0.54	..
PA0359	PP5228	221	1.9e-05	1	PA5278	No	No	No	127/205	0.61	..
PA3847	PP2607	221	0.0023	1	PA2243	No	No	No	277/493	0.56	..
PA5496	PP3146	220	0.0081	1	PA5309	No	No	No	184/314	0.58	..
PA0085	PP1351	220	0.0023	1	PA4397	No	No	No	164/281	0.58	..
PA0728	PP0129	220	0.018	1	PA5487	No	No	No	214/356	0.6	..
PA3276	PP1475	220	0.001	1	PA3733	No	No	No	178/299	0.59	..
PA2375	PP4310	220	0.00025	1	PA2383	No	No	No	208/356	0.58	..
PA1545	PP4401	220	0.0022	1	PA2247	No	No	No	256/452	0.56	..
PA0424	PP2375	220	0.0021	1	PA1843	No	No	No	190/326	0.58	..
PA4076	PP0959	220	2e-05	1	PA4455	No	No	No	200/344	0.58	..
PA2565	PP0586	219	0.0016	1	PA3920	No	No	No	241/426	0.56	..
PA2380	PP5302	219	3.4e-05	1	PA5338	No	No	No	95/141	0.67	..
PA1882	PP1618	219	8.2e-06	1	PA3627	No	No	No	171/294	0.58	..
PA4135	PP2376	219	0.0015	1	PA1846	No	No	No	217/375	0.57	..
PA4608	PP5300	219	2.7e-05	1	PA2267	No	No	No	229/384	0.59	..
PA0725	PP0805	219	3.1e-05	1	PA1876	No	No	No	155/243	0.63	..
PA1692	PP3345	219	2.1e-05	1	PA1807	No	No	No	125/201	0.62	..
PA1314	PP4689	219	0.00017	1	PA4708	No	No	No	203/354	0.57	..
PA1059	PP2329	218	3.3e-05	1	PA1758	No	No	No	166/283	0.58	..
PA2663	PP3082	218	3.3e-05	1	PA3355	No	No	No	136/223	0.6	..
PA2985	PP0652	218	0.0052	1	PA2322	No	No	No	244/427	0.57	..
PA2427	PP0365	218	0.0022	1	PA0503	No	No	No	270/463	0.58	..
PA4549	PP2418	217	0.0045	1	PA2371	No	No	No	289/509	0.56	..
PA0523	PP0548	217	0.0013	1	PA4019	No	Yes	No	165/266	0.62	..
PA4060	PP2403	217	2.5e-05	1	PA4101	No	No	No	155/263	0.58	..
PA2560	PP1760	217	4.1e-05	1	PA0860	No	No	No	171/281	0.6	..
PA0664	PP3021	217	0.00091	1	PA2710	No	No	No	233/404	0.57	..
PA1430	PP4625	217	0.0079	1	PA3431	No	No	No	191/335	0.57	..
PA1343	PP3546	216	0.0039	1	PA2177	No	No	No	196/336	0.58	..
PA3902	PP1289	216	0.0026	1	PA3539	No	No	No	214/366	0.58	..
PA2187	PP1905	216	0.0026	1	PA2976	No	No	No	150/255	0.58	..
PA4534	PP0365	216	0.0016	1	PA0503	No	No	No	202/357	0.56	..
PA1506	PP1052	216	2.1e-05	1	PA0246	No	No	No	172/291	0.59	..
PA2763	PP0197	216	2.1e-05	1	PA5251	No	No	No	128/210	0.6	..
PA2384	PP3181	216	3.4e-05	1	PA1662	No	No	No	174/297	0.58	..
PA2103	PP3419	215	0.037	1	PA4726	No	No	No	257/463	0.55	..
PA2499	PP4918	215	0.00092	1	PA4970	No	No	No	217/376	0.57	..
PA2358	PP1760	215	0.00085	1	PA0860	No	No	No	129/208	0.62	..
PA1042	PP4674	215	5.6e-05	1	PA4285	No	No	No	139/229	0.6	..
PA4383	PP1794	215	0.00051	1	PA3310	No	No	No	193/328	0.58	..
PA0824	PP4695	214	0.009	1	PA4725	No	No	No	232/404	0.57	..
PA4556	PP1905	214	0.0034	1	PA2976	No	No	No	216/371	0.58	..
PA1388	PP4124	214	0.021	1	PA2642	No	No	No	336/605	0.55	..
PA0737	PP2429	214	0.0022	1	PA2539	No	No	No	234/410	0.57	..
PA2100	PP4759	214	0.038	1	PA2355	No	No	No	108/173	0.62	..
PA0722	PP1929	214	5e-05	1	PA2278	No	No	No	114/179	0.63	..
PA0256	PP0586	214	0.033	1	PA3920	No	No	No	264/461	0.57	..
PA1755	PP1713	213	4.7e-05	1	PA0152	No	No	No	189/321	0.58	..
PA1934	PP2554	213	0.00069	1	PA0242	No	No	No	199/342	0.58	..
PA3180	PP3556	213	0.0038	1	PA2653	No	No	No	187/324	0.57	..
PA0610	PP1037	213	7e-05	1	PA3763	No	No	No	171/282	0.6	..
PA0561	PP4505	212	0.048	1	PA3206	No	No	No	198/340	0.58	..
PA2669	PP4948	212	0.015	1	PA5020	No	No	No	244/427	0.57	..
PA3866	PP3093	212	0.11	1	PA0079	No	No	No	304/541	0.56	..
PA0329	PP2670	212	6.2e-05	1	PA4225	No	No	No	174/295	0.58	..
PA2292	PP2064	212	5.7e-05	1	PA4206	No	No	No	164/274	0.59	..
PA1387	PP0519	212	0.062	1	PA4051	No	No	No	256/448	0.57	..
PA0346	PP3467	212	7e-05	1	PA4021	No	No	No	182/310	0.58	..
PA3477	PP1339	212	0.019	1	PA4410	No	No	No	196/340	0.57	..
PA2808	PP0351	212	5.3e-05	1	PA0471	No	No	No	94/142	0.66	..
PA2697	PP4495	212	6.4e-05	1	PA0866	No	No	No	116/184	0.63	..
PA2101	PP1724	211	0.028	1	PA3252	No	No	No	301/551	0.54	..
PA2568	PP1166	211	0.0024	1	PA2478	No	No	No	225/398	0.56	..
PA0518	PP3490	211	9e-05	1	PA0041	No	No	No	163/263	0.61	..
PA2673	PP2595	211	0.0046	1	PA4222	No	No	No	235/404	0.58	..
PA1058	PP1458	211	6.9e-05	1	PA3749	No	No	No	159/266	0.59	..
PA2245	PP3221	211	5.7e-05	1	PA4504	No	No	No	155/266	0.58	..
PA2759	PP3283	211	5.1e-05	1	PA4980	No	No	No	151/239	0.63	..
PA2318	PP1517	211	8.4e-05	1	PA3676	No	No	No	153/260	0.58	..
PA3221	PP2344	210	7e-05	1	PA2660	No	No	No	178/297	0.59	..
PA0122	PP1565	210	0.0035	1	PA1973	No	No	No	198/348	0.56	..
PA1710	PP1881	210	0.0063	1	PA3296	No	No	No	220/375	0.58	..
PA2819	PP2259	210	0.0096	1	PA4021	No	No	No	142/234	0.6	..
PA5284	PP5325	209	0.034	1	PA5365	No	No	No	269/472	0.56	..
PA3906	PP2158	209	0.0012	1	PA2809	No	No	No	123/199	0.61	..
PA1965	PP1321	209	2.5e-05	1	PA4427	No	No	No	189/322	0.58	..
PA0808	PP1494	209	0.0083	1	PA3702	No	No	No	249/436	0.57	..
PA4731	PP1526	209	0.0018	1	PA1163	No	Yes	No	161/280	0.57	..
PA1426	PP2361	209	6.4e-05	1	PA4651	No	No	No	209/358	0.58	..
PA3524	PP3766	209	0.00088	1	PA5111	No	Yes	No	107/172	0.62	..
PA3722	PP4906	209	9e-05	1	PA4955	No	No	No	201/346	0.58	..
PA3411	PP2456	208	8.3e-05	1	PA1948	No	No	No	126/206	0.61	..
PA0563	PP3173	208	8.8e-05	1	PA2932	No	No	No	190/332	0.57	..
PA0369	PP5133	208	9.7e-05	1	PA0345	No	No	No	128/209	0.61	..
PA0170	PP4219	208	0.0025	1	PA2424	No	No	No	186/329	0.56	..
PA1780	PP2541	208	4.6e-05	1	PA0744	No	Yes	No	132/218	0.6	..
PA3661	PP2392	208	9.1e-05	1	PA2314	No	No	No	206/359	0.57	..
PA2960	PP2362	208	0.00011	1	PA4652	No	No	No	178/311	0.57	..
PA4357	PP3602	208	0.0001	1	PA2217	No	No	No	124/200	0.62	..
PA2205	PP2436	208	0.0092	1	PA2551	No	No	No	262/473	0.55	..
PA2678	PP0112	208	0.03	1	PA5505	No	No	No	228/395	0.57	..
PA1090	PP4772	207	0.037	1	PA3961	No	No	No	295/522	0.56	..
PA4298	PP0916	207	6e-05	1	PA4365	No	No	No	155/255	0.6	..
PA0957	PP1277	207	0.0053	1	PA3551	No	No	No	215/372	0.57	..
PA4134	PP2028	207	0.00011	1	PA3074	No	No	No	129/207	0.62	..
PA2694	PP2027	207	0.00011	1	PA3075	No	No	No	195/330	0.59	..
PA4164	PP4065	207	0.00011	1	PA2014	No	No	No	193/333	0.57	..
PA2761	PP3486	207	0.0066	1	PA4226	No	No	No	183/306	0.59	..
PA4086	PP2155	206	0.016	1	PA2987	No	No	No	280/517	0.54	..
PA3510	PP2300	206	0.012	1	PA1801	No	No	No	228/394	0.57	..
PA3868	PP5187	206	0.075	1	PA5209	No	No	No	440/808	0.54	..
PA0488	PP4564	206	9.4e-05	1	PA1099	No	No	No	140/232	0.6	..
PA1492	PP0200	206	0.00012	1	PA0451	No	No	No	154/259	0.59	..
PA0654	PP0367	206	0.00021	1	PA1085	No	Yes	No	198/346	0.57	..
PA3157	PP3734	206	0.19	1	PA0041	No	Yes	No	392/724	0.54	..
PA1175	PP2146	206	0.00013	1	PA0799	No	No	No	184/313	0.58	..
PA1711	PP2411	206	0.00012	1	PA4343	No	No	No	128/208	0.61	..
PA3298	PP5246	205	0.00014	1	PA1207	No	No	No	145/233	0.62	..
PA1133	PP4988	205	0.00017	1	PA0413	No	No	No	199/341	0.58	..
PA0131	PP2817	205	0.00012	1	PA4599	No	No	No	167/284	0.58	..
PA2722	PP2795	205	0.0052	1	PA4198	No	No	No	229/407	0.56	..
PA4637	PP1202	205	0.00015	1	PA0920	No	No	No	143/236	0.6	..
PA1963	PP1037	205	0.00016	1	PA3763	No	No	No	147/254	0.57	..
PA5026	PP4824	205	0.015	1	PA4856	No	No	No	183/317	0.57	..
PA0912	PP4184	205	0.024	1	PA1971	No	No	No	251/449	0.55	..
PA2106	PP5387	205	0.058	1	PA2520	No	No	No	265/470	0.56	..
PA0689	PP2430	204	0.083	1	PA2917	No	No	No	292/525	0.55	..
PA2149	PP2572	204	9e-05	1	PA5207	No	No	No	144/246	0.58	..
PA1743	PP2329	204	0.00015	1	PA1758	No	No	No	120/195	0.61	..
PA0921	PP0226	204	0.00056	1	PA0313	No	No	No	200/339	0.58	..
[truncated: 3,672 more rows]

## Sheet: 2 ppuvspao_BLAST
Table 2: PPU vs PAO BLAST results
PPU Protein	PAO Protein	High score	P(N)	N	Reverse match	Reverse agreement	In PPU model	Protein agreement	BLAST identities	BLAST % identity	..
PP4219	PA2424	7707	0	1	PP4243	No	No	No	6311/10791	0.58	..
PP3373	PA3648	6730	1e-300	1	PP1599	No	No	No	1656/2012	0.82	..
PP0043	PA2520	6486	8e-290	1	PP2410	No	No	No	2228/3210	0.69	..
PP4596	PA5181	6390	2.4e-285	1	PP0256	No	No	No	1762/2307	0.76	..
PP1157	PA4180	6010	4.8e-268	1	PP3365	No	Yes	No	1402/1646	0.85	..
PP2680	PA1984	5519	7.9e-246	1	PP0545	No	Yes	No	1291/1522	0.84	..
PP1808	PA4732	5262	2.9e-234	1	PP4701	No	Yes	No	1346/1677	0.8	..
PP3458	PA2557	5019	2.7e-223	1	PP4063	No	Yes	No	1319/1674	0.78	..
PP3741	PA4003	4970	3.9e-221	1	PP4807	No	No	No	1416/1897	0.74	..
PP0269	PA3602	4821	2.5e-214	1	PP1060	No	No	No	1277/1623	0.78	..
PP5299	PA2040	4658	6.7e-207	1	PP5184	No	Yes	No	1140/1384	0.82	..
PP3148	PA0298	4510	3.3e-200	1	PP5183	No	Yes	No	1114/1364	0.81	..
PP3602	PA2217	4344	8.9e-193	1	PP2585	No	No	No	1222/1596	0.76	..
PP3446	PA1326	4264	3.7e-189	1	PP5149	No	Yes	No	1174/1550	0.75	..
PP0440	PA4277	4243	4.3e-188	1	PP0452	No	No	No	1011/1199	0.84	..
PP3554	PA4199	4226	1.7e-187	1	PP0370	No	No	No	1118/1423	0.78	..
PP1371	PA4309	4171	4.9e-185	1	PP2249	No	No	No	1241/1691	0.73	..
PP2180	PA0299	4084	5.7e-181	1	PP5182	No	No	No	1062/1346	0.78	..
PP4221	PA2400	3971	1.5e-176	1	PP4219	No	No	No	1635/3073	0.53	..
PP3144	PA5379	3908	5e-173	1	PP0297	No	Yes	No	1064/1387	0.76	..
PP3272	PA3234	3903	7e-173	1	PP1743	No	No	No	1147/1563	0.73	..
PP1929	PA2278	3612	1.3e-159	1	PP2717	No	No	No	988/1293	0.76	..
PP0614	PA0444	3611	1.4e-159	1	PP4034	No	Yes	No	959/1231	0.77	..
PP1445	PA3186	3458	1.1e-152	1	PP1019	No	No	No	1002/1336	0.75	..
PP2925	PA3452	3426	2.6e-151	1	PP1251	No	Yes	No	1102/1551	0.71	..
PP3953	PA3210	3384	2.2e-149	1	PP4507	No	No	No	1048/1464	0.71	..
PP3202	PA3079	3360	1.6e-148	1	PP2019	No	No	No	1546/2397	0.64	..
PP4756	PA0129	3341	2e-147	1	PP0284	No	No	No	991/1357	0.73	..
PP3146	PA5309	3313	3.9e-146	1	PP5273	No	No	No	961/1295	0.74	..
PP1003	PA5170	3210	1.6e-141	1	PP1002	No	No	No	962/1302	0.73	..
PP2205	PA2065	3193	7.2e-141	1	PP5380	No	No	No	1187/1715	0.69	..
PP1228	PA2654	3178	3e-140	1	PP3557	No	No	No	1264/1895	0.66	..
PP2569	PA3709	3166	1.4e-139	1	PP0057	No	No	No	912/1232	0.74	..
PP0885	PA4496	3143	1.5e-138	1	PP0884	No	No	No	831/1054	0.78	..
PP2911	PA0129	3048	3.4e-134	1	PP0284	No	Yes	No	980/1380	0.71	..
PP1940	PA2654	3003	2.4e-132	1	PP3557	No	No	No	1343/2160	0.62	..
PP4434	PA5304	2982	3.6e-131	1	PP5270	No	Yes	No	930/1311	0.7	..
PP2048	PA5187	2918	2e-128	1	PP0368	No	No	No	1076/1567	0.68	..
PP2517	PA0240	2826	4.1e-124	1	PP1383	No	No	No	836/1137	0.73	..
PP3529	PA2326	2800	5.5e-123	1	PP2746	No	No	No	940/1352	0.69	..
PP2795	PA4198	2774	7.1e-122	1	PP3553	No	Yes	No	1022/1510	0.67	..
PP2696	PA3587	2758	6.6e-121	1	PP1063	No	No	No	722/917	0.78	..
PP4106	PA0129	2750	9.8e-121	1	PP0284	No	Yes	No	942/1381	0.68	..
PP2628	PA3228	2742	1.7e-120	1	PP4542	No	No	No	1222/1881	0.64	..
PP3280	PA0228	2717	3.6e-119	1	PP1377	No	Yes	No	875/1222	0.71	..
PP0713	PA1207	2702	1.1e-118	1	PP5246	No	No	No	840/1177	0.71	..
PP5020	PA5072	2676	1.6e-117	1	PP4658	No	No	No	1234/1890	0.65	..
PP4521	PA1561	2616	1e-114	1	PP2111	No	No	No	1072/1614	0.66	..
PP0451	PA2071	2600	3.5e-277	3	PP4111	No	No	No	750/1003	0.74	..
PP3077	PA1809	2545	2.3e-111	1	PP4148	No	No	No	787/1076	0.73	..
PP3078	PA1810	2531	3.8e-123	2	PP4147	No	No	No	1149/1825	0.62	..
PP3147	PA0301	2526	1.7e-110	1	PP5180	No	No	No	782/1089	0.71	..
PP2600	PA2243	2486	6.7e-109	1	PP2605	No	No	No	946/1393	0.67	..
PP0046	PA2505	2478	2e-108	1	PP3630	No	No	No	878/1290	0.68	..
PP2056	PA1183	2477	2.3e-108	1	PP1188	No	Yes	No	861/1258	0.68	..
PP3076	PA1808	2474	4e-108	1	PP4149	No	No	No	738/1021	0.72	..
PP2057	PA5468	2471	4.3e-108	1	PP0147	No	No	No	897/1318	0.68	..
PP5021	PA5072	2432	1.7e-106	1	PP4658	No	No	No	1270/2005	0.63	..
PP5341	PA0300	2402	6.6e-105	1	PP5181	No	Yes	No	766/1093	0.7	..
PP2257	PA1561	2394	1.1e-104	1	PP2111	No	No	No	1054/1617	0.65	..
PP2974	PA1689	2368	1e-131	2	PP1838	No	No	No	846/1238	0.68	..
PP3492	PA2552	2346	2.2e-102	1	PP2216	No	Yes	No	778/1122	0.69	..
PP0927	PA3000	2332	7.5e-102	1	PP4495	No	Yes	No	760/1067	0.71	..
PP0660	PA4981	2328	1.1e-101	1	PP3727	No	No	No	906/1386	0.65	..
PP2797	PA3234	2223	5.3e-97	1	PP1743	No	Yes	No	835/1242	0.67	..
PP3813	PA4054	2221	9.9e-97	1	PP0516	No	Yes	No	687/938	0.73	..
PP3669	PA2492	2216	1.8e-96	1	PP2826	No	No	No	666/913	0.72	..
PP3220	PA2061	2205	3.6e-96	1	PP4150	No	No	No	1033/1596	0.64	..
PP4251	PA1556	2203	1.2e-95	1	PP4256	No	Yes	No	519/611	0.84	..
PP4206	PA5370	2202	6e-96	1	PP5330	No	No	No	860/1296	0.66	..
PP2543	PA0129	2182	4.4e-95	1	PP0284	No	Yes	No	754/1094	0.68	..
PP2935	PA1993	2173	1.3e-94	1	PP4492	No	No	No	805/1208	0.66	..
PP1698	PA2114	2148	1.7e-93	1	PP4578	No	No	No	826/1254	0.65	..
PP0167	PA1876	2140	2.3e-93	1	PP0804	No	No	No	1330/2222	0.59	..
PP3590	PA3139	2112	7.6e-92	1	PP1972	No	Yes	No	802/1191	0.67	..
PP3166	PA2507	2044	9.4e-97	2	PP3713	No	No	No	604/818	0.73	..
PP3467	PA4021	2041	7.6e-89	1	PP0546	No	No	No	1151/1844	0.62	..
PP4422	PA0265	2021	8.1e-88	1	PP0213	No	No	No	913/1447	0.63	..
PP4107	PA4914	2018	1.7e-87	1	PP5259	No	No	No	644/904	0.71	..
PP1983	PA4601	1942	6e-82	1	PP0672	No	No	No	1704/2984	0.57	..
PP2643	PA1251	1932	7.6e-84	1	PP0317	No	No	No	764/1161	0.65	..
PP2759	PA1947	1929	1.1e-83	1	PP2455	No	No	No	971/1533	0.63	..
PP0662	PA3735	1926	1.6e-83	1	PP1471	No	Yes	No	878/1371	0.64	..
PP4840	PA5097	1923	2.2e-83	1	PP5031	No	Yes	No	897/1422	0.63	..
PP3176	PA4126	1921	3e-83	1	PP3940	No	No	No	847/1310	0.64	..
PP2412	PA5028	1914	1e-82	1	PP5070	No	No	No	572/774	0.73	..
PP3354	PA4199	1910	6.8e-83	1	PP0370	No	No	No	1082/1777	0.6	..
PP2035	PA1651	1905	1.7e-82	1	PP1820	No	No	No	771/1173	0.65	..
PP0669	PA4168	1884	6.5e-104	2	PP4217	No	No	No	958/1521	0.62	..
PP3167	PA1651	1870	6.5e-81	1	PP1820	No	No	No	782/1181	0.66	..
PP1927	PA2280	1862	2.6e-80	1	PP2715	No	No	No	526/700	0.75	..
PP4753	PA5398	1858	1.3e-80	1	PP0310	No	No	No	1204/2036	0.59	..
PP3305	PA2549	1856	3.2e-80	1	PP2438	No	No	No	654/979	0.66	..
PP2258	PA0575	1853	9.7e-80	1	PP0386	No	No	No	1027/1675	0.61	..
PP5248	PA1202	1847	1.4e-79	1	PP5255	No	No	No	475/598	0.79	..
PP3413	PA3946	1845	1.6e-77	1	PP2100	No	No	No	1219/2016	0.6	..
PP5243	PA1202	1843	2.1e-79	1	PP5255	No	No	No	475/596	0.79	..
PP3155	PA4837	1834	1.5e-79	1	PP3325	No	No	No	1098/1826	0.6	..
PP1256	PA1253	1827	4.3e-79	1	PP2585	No	No	No	973/1569	0.62	..
PP2679	PA1982	1825	4.5e-79	1	PP2674	No	No	No	605/848	0.71	..
PP3302	PA3676	1822	3.7e-79	1	PP1517	No	No	No	930/1511	0.61	..
PP1039	PA5070	1815	3e-78	1	PP5018	No	No	No	523/702	0.74	..
PP0711	PA1202	1809	7.2e-78	1	PP5255	No	No	No	473/609	0.77	..
PP3754	PA2001	1800	9.6e-78	1	PP4636	No	Yes	No	766/1200	0.63	..
PP1807	PA3636	1769	3.4e-76	1	PP1611	No	Yes	No	585/832	0.7	..
PP4049	PA0262	1756	3.6e-76	1	PP2614	No	No	No	1024/1694	0.6	..
PP2204	PA2064	1748	2.6e-75	1	PP5379	No	No	No	610/871	0.7	..
PP3729	PA4982	1725	9.2e-75	1	PP3728	No	No	No	537/732	0.73	..
PP2074	PA2492	1723	3.2e-74	1	PP2826	No	No	No	631/932	0.67	..
PP2535	PA4355	1709	1.2e-73	1	PP2367	No	No	No	743/1147	0.64	..
PP3386	PA1511	1707	7.1e-74	1	PP2614	No	No	No	883/1425	0.61	..
PP3719	PA0300	1701	3e-73	1	PP5181	No	No	No	687/1077	0.63	..
PP0718	PA1647	1699	2.4e-73	1	PP1407	No	No	No	1025/1715	0.59	..
PP3182	PA5442	1696	2e-73	1	PP0386	No	No	No	1320/2267	0.58	..
PP5374	PA5291	1673	3.1e-72	1	PP3957	No	Yes	No	1013/1693	0.59	..
PP1481	PA0265	1667	7.9e-72	1	PP0213	No	No	No	879/1420	0.61	..
PP3575	PA1910	1657	1.3e-71	1	PP2590	No	No	No	919/1487	0.61	..
PP3665	PA5380	1642	1.4e-70	1	PP0298	No	No	No	646/965	0.66	..
PP4042	PA5439	1637	1.8e-70	1	PP5351	No	Yes	No	919/1492	0.61	..
PP2861	PA4633	1633	1.8e-70	1	PP3557	No	No	No	941/1544	0.6	..
PP0024	PA3310	1632	2.6e-70	1	PP4592	No	No	No	904/1467	0.61	..
PP3493	PA0159	1621	1.5e-69	1	PP1262	No	No	No	603/905	0.66	..
PP3391	PA4126	1615	2e-69	1	PP3940	No	No	No	777/1250	0.62	..
PP4959	PA0285	1609	2.1e-69	1	PP0218	No	No	No	1095/1847	0.59	..
PP1850	PA1352	1601	9.1e-69	1	PP0503	No	No	No	751/1177	0.63	..
PP5368	PA3355	1596	1.4e-68	1	PP4398	No	No	No	690/1095	0.63	..
PP2042	PA3923	1596	9.6e-69	1	PP0765	No	No	No	868/1407	0.61	..
PP1300	PA1339	1592	3.8e-68	1	PP1068	No	No	No	532/736	0.72	..
PP4080	PA0079	1584	4.8e-68	1	PP2617	No	No	No	832/1362	0.61	..
PP3597	PA1339	1579	1.5e-67	1	PP1068	No	No	No	527/740	0.71	..
PP2128	PA3349	1571	2.7e-67	1	PP4393	No	No	No	617/940	0.65	..
PP4108	PA0266	1533	1e-65	1	PP0214	No	No	No	747/1212	0.61	..
PP3817	PA0603	1524	3e-65	1	PP0411	No	No	No	688/1089	0.63	..
PP2058	PA2113	1522	3.3e-65	1	PP3271	No	No	No	714/1130	0.63	..
PP0320	PA4633	1516	3.5e-65	1	PP3557	No	No	No	794/1277	0.62	..
PP1173	PA0240	1507	1.5e-64	1	PP1383	No	No	No	771/1229	0.62	..
PP2607	PA2243	1486	9.9e-64	1	PP2605	No	No	No	1020/1748	0.58	..
PP4291	PA0165	1484	2.5e-63	1	PP4293	No	No	No	454/622	0.72	..
PP3390	PA0755	1479	4.8e-75	2	PP1419	No	No	No	671/1062	0.63	..
PP3087	PA4234	1474	9e-63	1	PP0483	No	No	No	1498/2627	0.57	..
PP3319	PA0575	1470	4.4e-62	1	PP0386	No	No	No	1158/2028	0.57	..
PP2561	PA2424	1468	1.1e-57	1	PP4243	No	No	No	5104/9488	0.53	..
PP5383	PA2809	1460	3.8e-62	1	PP2158	No	No	No	474/679	0.69	..
PP0584	PA4633	1455	2e-62	1	PP3557	No	No	No	905/1503	0.6	..
PP2195	PA0300	1450	6.6e-62	1	PP5181	No	No	No	686/1073	0.63	..
PP0708	PA0265	1439	1.6e-61	1	PP0213	No	No	No	877/1462	0.59	..
PP3623	PA2266	1437	2.1e-61	1	PP3382	No	No	No	731/1143	0.63	..
PP2801	PA0265	1433	2.9e-61	1	PP0213	No	No	No	873/1441	0.6	..
PP4600	PA3029	1429	1.2e-60	1	PP2122	No	No	No	381/494	0.77	..
PP2512	PA3438	1429	1.1e-60	1	PP1823	No	Yes	No	401/545	0.73	..
PP2043	PA3081	1427	5.8e-61	1	PP0766	No	No	No	811/1330	0.6	..
PP3168	PA0755	1410	3.6e-60	1	PP1419	No	No	No	698/1140	0.61	..
PP0168	PA1874	1403	2.3e-54	1	PP0806	No	No	#N/A	3801/7060	0.53	..
PP3311	PA1207	1402	5.8e-60	1	PP5246	No	No	No	772/1280	0.6	..
PP3419	PA4726	1401	8.3e-60	1	PP4696	No	No	No	881/1464	0.6	..
PP1206	PA2113	1392	2.5e-59	1	PP3271	No	No	No	700/1122	0.62	..
PP2184	PA2641	1391	2.5e-59	1	PP4123	No	Yes	No	777/1294	0.6	..
PP3939	PA1025	1387	4.1e-59	1	PP1419	No	No	No	773/1283	0.6	..
PP2659	PA5366	1380	1.3e-58	1	PP5326	No	No	No	502/732	0.68	..
PP2390	PA5293	1379	1.3e-58	1	PP5261	No	No	No	581/895	0.64	..
PP2259	PA4021	1379	6.1e-59	1	PP0546	No	No	No	1025/1735	0.59	..
PP4407	PA0129	1375	1.2e-58	1	PP0284	No	No	No	741/1214	0.61	..
PP1254	PA3723	1365	4.5e-58	1	PP1478	No	No	No	653/1044	0.62	..
PP0029	PA2523	1364	8.2e-58	1	PP1438	No	No	No	464/682	0.68	..
PP3152	PA1413	1359	1.1e-57	1	PP4525	No	No	No	553/840	0.65	..
PP2754	PA0162	1351	1.6e-57	1	PP0799	No	No	No	709/1139	0.62	..
PP2694	PA3504	1348	2e-57	1	PP3646	No	Yes	No	894/1496	0.59	..
PP5298	PA0297	1347	4.3e-57	1	PP2179	No	No	No	495/732	0.67	..
PP3569	PA2290	1336	6.3e-55	1	PP1444	No	No	No	1276/2231	0.57	..
PP0702	PA5311	1333	1.2e-56	1	PP5277	No	No	No	717/1145	0.62	..
PP2409	PA2521	1321	3.3e-56	1	PP0044	No	No	No	453/653	0.69	..
PP0178	PA3892	1319	6.6e-56	1	PP1266	No	No	No	551/841	0.65	..
PP3483	PA3103	1317	4.9e-56	1	PP1047	No	No	No	901/1518	0.59	..
PP4888	PA2920	1312	7.6e-56	1	PP1228	No	No	No	984/1673	0.58	..
PP5137	PA0326	1309	1.6e-55	1	PP1484	No	No	No	643/1010	0.63	..
PP1308	PA0400	1302	3e-55	1	PP4594	No	Yes	No	650/1059	0.61	..
PP3368	PA4355	1300	3.7e-55	1	PP2367	No	No	No	674/1097	0.61	..
PP3628	PA5375	1296	4.2e-55	1	PP5061	No	Yes	No	928/1548	0.59	..
PP3265	PA2156	1295	9.9e-55	1	PP4056	No	No	No	499/736	0.67	..
PP3151	PA0265	1295	5e-55	1	PP0213	No	No	No	849/1432	0.59	..
PP3323	PA5535	1292	8.3e-55	1	PP5361	No	No	No	416/586	0.7	..
PP3002	PA0025	1280	4.2e-54	1	PP0074	No	Yes	No	538/820	0.65	..
PP3624	PA2902	1279	4.5e-54	1	PP4200	No	No	No	515/785	0.65	..
PP2830	PA4126	1279	2.9e-54	1	PP3940	No	No	No	729/1220	0.59	..
PP2790	PA1097	1277	3.2e-54	1	PP4373	No	No	No	647/1033	0.62	..
PP3566	PA1352	1263	1.7e-53	1	PP0503	No	No	No	715/1161	0.61	..
PP5115	PA0372	1252	4.6e-53	1	PP5112	No	No	No	728/1208	0.6	..
PP2489	PA3723	1240	2e-52	1	PP1478	No	No	No	632/1022	0.61	..
PP3414	PA1423	1238	2.2e-52	1	PP0779	No	No	No	722/1186	0.6	..
PP0659	PA3107	1237	2.5e-52	1	PP2001	No	Yes	No	747/1223	0.61	..
PP0030	PA2524	1234	2.9e-52	1	PP1437	No	No	No	668/1085	0.61	..
PP1449	PA0041	1234	1.2e-47	1	PP4243	No	No	No	2482/4523	0.54	..
PP0652	PA2322	1232	3.8e-52	1	PP3417	No	Yes	No	694/1162	0.59	..
PP0047	PA2523	1225	1.6e-51	1	PP1438	No	No	No	443/671	0.66	..
PP5371	PA5349	1222	1.2e-51	1	PP5314	No	No	No	684/1130	0.6	..
PP4453	PA1807	1221	2.1e-84	2	PP4150	No	No	No	561/870	0.64	..
PP5253	PA2717	1204	1.1e-50	1	PP4021	No	No	No	526/821	0.64	..
PP2487	PA1984	1201	9.8e-102	2	PP0545	No	No	No	455/686	0.66	..
PP2823	PA4633	1201	6e-51	1	PP3557	No	No	No	919/1565	0.58	..
PP5387	PA2520	1179	7.5e-46	1	PP2410	No	No	No	1777/3264	0.54	..
PP1948	PA4073	1179	8.5e-50	1	PP3463	No	No	No	723/1209	0.59	..
PP2810	PA3081	1174	1.6e-49	1	PP0766	No	No	No	776/1307	0.59	..
PP2356	PA4117	1163	2e-46	1	PP3364	No	No	No	1145/1990	0.57	..
PP4421	PA4805	1152	1.5e-48	1	PP3718	No	No	No	756/1263	0.59	..
PP2812	PA3079	1145	4.7e-45	1	PP2019	No	No	No	1147/2008	0.57	..
PP3344	PA4504	1144	5.3e-48	1	PP0880	No	No	No	522/824	0.63	..
PP3711	PA0575	1143	3.8e-47	1	PP0386	No	No	No	893/1536	0.58	..
PP3593	PA5153	1139	1.1e-47	1	PP0282	No	No	No	483/760	0.63	..
PP2479	PA4619	1138	7.2e-48	1	PP4232	No	No	No	730/1217	0.59	..
PP2101	PA0034	1132	2.7e-47	1	PP1090	No	No	No	412/617	0.66	..
PP4156	PA2758	1132	1.9e-47	1	PP2250	No	No	No	554/902	0.61	..
PP3753	PA2556	1127	2.6e-47	1	PP2211	No	No	No	601/979	0.61	..
PP3528	PA3445	1123	4.4e-47	1	PP0237	No	No	No	575/929	0.61	..
PP0265	PA5164	1122	8.7e-47	1	PP1782	No	Yes	No	384/552	0.69	..
PP3755	PA1628	1116	5.8e-47	1	PP3282	No	Yes	No	550/864	0.63	..
PP3214	PA0165	1112	1.6e-46	1	PP4293	No	No	No	524/820	0.63	..
PP2799	PA0299	1107	4.4e-67	2	PP5182	No	No	No	561/894	0.62	..
PP3154	PA4661	1104	5.9e-46	1	PP0737	No	No	No	362/513	0.7	..
PP2767	PA1071	1103	4.5e-46	1	PP1138	No	Yes	No	495/775	0.63	..
PP2595	PA4222	1101	2.4e-46	1	PP2596	No	No	No	925/1599	0.57	..
PP4668	PA3711	1099	5.7e-46	1	PP0055	No	No	No	523/827	0.63	..
PP2803	PA5186	1089	1.3e-45	1	PP2049	No	No	No	659/1074	0.61	..
PP3466	PA1113	1086	1.1e-45	1	PP2119	No	No	No	998/1746	0.57	..
PP3641	PA5099	1084	1.7e-45	1	PP3655	No	No	No	824/1421	0.57	..
PP4494	PA0448	1081	3.7e-45	1	PP0157	No	No	No	553/896	0.61	..
PP3191	PA0331	1081	2.2e-45	1	PP5149	No	Yes	No	601/965	0.62	..
PP1836	PA4467	1076	6.1e-45	1	PP0947	No	No	No	490/766	0.63	..
PP0225	PA5074	1071	2.5e-51	2	PP5022	No	Yes	No	413/597	0.69	..
PP5242	PA2424	1070	4.4e-40	1	PP4243	No	No	No	2798/5173	0.54	..
PP3209	PA0142	1069	8.7e-45	1	PP2584	No	No	No	795/1349	0.58	..
PP2261	PA3187	1068	1.1e-44	1	PP1018	No	No	No	626/1014	0.61	..
PP3082	PA3355	1061	2.1e-44	1	PP4398	No	No	No	747/1255	0.59	..
PP2952	PA3565	1058	4e-44	1	PP2431	No	No	No	506/793	0.63	..
PP3952	PA2000	1057	6.2e-44	1	PP3123	No	Yes	No	369/539	0.68	..
PP3221	PA4504	1057	4.5e-44	1	PP0880	No	No	No	491/782	0.62	..
PP3951	PA1999	1055	7.2e-44	1	PP3122	No	Yes	No	407/619	0.65	..
PP1797	PA1247	1046	9.9e-44	1	PP2559	No	No	No	768/1324	0.58	..
PP0179	PA1238	1040	1.7e-43	1	PP2069	No	No	No	852/1474	0.57	..
PP2871	PA3430	1039	3.4e-43	1	PP3224	No	No	No	403/593	0.67	..
PP4425	PA5152	1039	3.4e-43	1	PP0283	No	No	No	471/746	0.63	..
PP5116	PA0371	1037	2.2e-43	1	PP5113	No	No	No	787/1360	0.57	..
PP2693	PA5396	1033	5.1e-43	1	PP0308	No	No	No	571/932	0.61	..
PP2445	PA5469	1029	9.8e-43	1	PP0146	No	No	No	479/753	0.63	..
PP2553	PA3709	1026	6.3e-43	1	PP0057	No	No	No	574/948	0.6	..
PP2780	PA2965	1020	1.5e-42	1	PP1916	No	No	No	546/894	0.61	..
PP2177	PA0535	1018	4.3e-42	1	PP2181	No	No	No	374/560	0.66	..
PP3424	PA0687	1017	2.2e-42	1	PP1048	No	No	No	731/1248	0.58	..
PP2793	PA2552	1017	2.3e-42	1	PP2216	No	Yes	No	651/1086	0.59	..
PP3815	PA0605	1005	7.3e-42	1	PP0413	No	No	No	409/627	0.65	..
PP2907	PA2809	1005	1.3e-41	1	PP2158	No	No	No	433/684	0.63	..
PP3651	PA2177	1002	1.5e-38	1	PP3835	No	No	No	1046/1863	0.56	..
PP4082	PA5267	998	3.6e-41	1	PP2615	No	No	No	354/523	0.67	..
PP3143	PA0032	995	2.8e-41	1	PP0079	No	No	No	571/937	0.6	..
PP1949	PA3710	992	2.1e-41	1	PP0056	No	No	No	942/1696	0.55	..
PP3491	PA0744	991	3.5e-41	1	PP1412	No	Yes	No	635/1067	0.59	..
PP2713	PA4776	988	8e-41	1	PP4225	No	No	No	420/662	0.63	..
PP2253	PA1520	987	7.6e-41	1	PP4283	No	No	No	395/600	0.65	..
PP3085	PA0471	986	6.8e-41	1	PP0351	No	No	No	604/982	0.61	..
PP0488	PA4907	984	1.1e-40	1	PP4862	No	No	No	394/597	0.65	..
PP0715	PA0427	982	6.8e-41	1	PP1384	No	No	No	872/1493	0.58	..
PP3429	PA1243	976	9.7e-40	1	PP2354	No	No	No	756/1274	0.59	..
PP3666	PA3709	976	1.1e-40	1	PP0057	No	No	No	802/1376	0.58	..
PP2039	PA2552	973	2.3e-40	1	PP2216	No	No	No	671/1115	0.6	..
PP5037	PA5107	972	5e-40	1	PP4032	No	No	No	376/561	0.67	..
PP3761	PA4112	967	7.8e-36	1	PP1650	No	No	No	1545/2777	0.55	..
PP0271	PA4101	965	7.9e-40	1	PP2403	No	No	No	475/736	0.64	..
PP0166	PA1877	959	9.2e-40	1	PP0803	No	No	No	547/892	0.61	..
PP3001	PA3733	952	1.8e-39	1	PP1475	No	No	No	552/911	0.6	..
PP2260	PA3187	951	2.2e-39	1	PP1018	No	No	No	519/843	0.61	..
PP1164	PA0056	948	3.7e-39	1	PP1391	No	No	No	554/903	0.61	..
PP2217	PA3591	942	8e-39	1	PP3284	No	Yes	No	484/783	0.61	..
PP2408	PA2522	942	5e-39	1	PP0045	No	No	No	722/1230	0.58	..
PP3097	PA1660	941	1.3e-38	1	PP2621	No	No	No	909/1573	0.57	..
PP3950	PA1646	938	1.4e-35	1	PP1819	No	No	No	1082/1900	0.56	..
PP3546	PA2177	933	2.5e-35	1	PP3835	No	No	No	1123/2019	0.55	..
PP3893	PA4931	930	1.6e-38	1	PP4873	No	No	No	780/1356	0.57	..
PP3171	PA2483	927	3e-38	1	PP0088	No	No	No	619/1026	0.6	..
PP2185	PA1779	925	3e-34	1	PP1703	No	Yes	No	1185/2123	0.55	..
PP3392	PA3753	923	8.8e-38	1	PP1454	No	No	No	317/460	0.68	..
PP3395	PA0877	920	7e-38	1	PP4664	No	No	No	538/901	0.59	..
PP3672	PA2072	920	3.7e-37	1	PP1154	No	No	No	374/556	0.67	..
PP1928	PA2279	919	1.5e-37	1	PP2716	No	No	No	323/476	0.67	..
PP2482	PA3870	918	7.8e-38	1	PP4597	No	No	No	588/975	0.6	..
PP3454	PA1157	912	2e-37	1	PP1181	No	No	No	468/732	0.63	..
PP3179	PA5029	910	2e-37	1	PP5071	No	No	No	512/830	0.61	..
PP1740	PA1163	908	5.3e-36	1	PP1526	No	No	No	794/1381	0.57	..
PP4612	PA3900	904	3.5e-37	1	PP0351	No	No	No	466/755	0.61	..
PP3811	PA0056	900	5.5e-37	1	PP1391	No	No	No	546/903	0.6	..
PP2748	PA1071	899	7.3e-37	1	PP1138	No	Yes	No	471/769	0.61	..
PP3355	PA3589	897	5.7e-37	1	PP3280	No	No	No	701/1212	0.57	..
PP1393	PA5293	896	8.3e-37	1	PP5261	No	No	No	512/832	0.61	..
PP3598	PA0297	892	1.5e-36	1	PP2179	No	No	No	448/719	0.62	..
PP5372	PA5373	889	4.2e-57	2	PP5063	No	No	No	641/1094	0.58	..
PP3086	PA1912	888	3.5e-36	1	PP3577	No	No	No	340/516	0.65	..
PP3594	PA0889	888	2.5e-36	1	PP4485	No	No	No	424/669	0.63	..
PP2753	PA1070	886	7.9e-47	2	PP1137	No	Yes	No	384/581	0.66	..
PP2961	PA2547	883	3.2e-36	1	PP1164	No	No	No	547/905	0.6	..
PP2800	PA2413	878	3.5e-36	1	PP4223	No	No	No	762/1291	0.59	..
PP0570	PA2462	875	3.2e-31	1	PP0806	No	No	No	2149/3982	0.53	..
PP1943	PA5420	873	9.7e-36	1	PP0327	No	Yes	No	399/624	0.63	..
PP2650	PA5186	871	8.8e-36	1	PP2049	No	No	No	689/1175	0.58	..
PP3595	PA5155	869	1.8e-35	1	PP0280	No	No	No	393/613	0.64	..
PP2914	PA3749	860	4e-55	2	PP1458	No	No	No	406/664	0.61	..
PP3338	PA3929	860	3.2e-35	1	PP4650	No	No	No	216/268	0.8	..
PP0704	PA3899	849	2e-34	1	PP4611	No	No	No	341/507	0.67	..
PP2692	PA5291	847	4e-32	1	PP3957	No	Yes	No	865/1526	0.56	..
PP3375	PA2749	846	1.9e-34	1	PP2451	No	No	No	370/573	0.64	..
PP3450	PA0041	839	3.6e-30	1	PP4243	No	No	No	1333/2398	0.55	..
PP3596	PA5084	837	2.8e-34	1	PP4311	No	No	No	769/1302	0.59	..
PP3498	PA0445	837	3.5e-34	1	PP0334	No	No	No	599/1020	0.58	..
PP4077	PA1660	833	2.3e-31	1	PP2621	No	No	No	443/712	0.62	..
PP4751	PA1256	832	4.9e-43	2	PP5022	No	No	No	372/587	0.63	..
PP3431	PA2719	829	1.2e-33	1	PP2992	No	No	No	427/686	0.62	..
PP0661	PA0448	827	1.1e-33	1	PP0157	No	No	No	535/898	0.59	..
PP0051	PA2359	824	9.1e-43	2	PP2771	No	No	No	430/691	0.62	..
PP3211	PA2294	819	2.7e-33	1	PP0209	No	No	No	403/645	0.62	..
PP2488	PA0265	819	1.6e-33	1	PP0213	No	Yes	No	791/1416	0.55	..
PP0992	PA3283	816	3.7e-33	1	PP2398	No	No	No	506/834	0.6	..
PP0530	PA4054	814	3.5e-33	1	PP0516	No	Yes	No	390/620	0.62	..
PP3208	PA3498	813	4.5e-33	1	PP3737	No	No	No	571/975	0.58	..
PP2054	PA1998	809	7.1e-33	1	PP3121	No	No	No	521/859	0.6	..
PP0535	PA4168	808	3.5e-29	1	PP4217	No	No	No	540/905	0.59	..
PP1946	PA1649	805	1.3e-32	1	PP1817	No	No	No	459/767	0.59	..
PP3788	PA2400	802	2.6e-29	1	PP4219	No	No	No	622/1049	0.59	..
PP2563	PA2400	801	5.1e-29	3	PP4219	No	No	No	865/1530	0.56	..
PP2539	PA2206	799	1.9e-32	1	PP2832	No	No	No	525/887	0.59	..
PP4493	PA2424	799	4.1e-28	1	PP4243	No	No	No	1665/3041	0.54	..
PP1969	PA1505	790	4.7e-32	1	PP4597	No	No	No	568/968	0.58	..
PP3372	PA1157	786	1e-31	1	PP1181	No	No	No	438/711	0.61	..
PP5384	PA2810	783	2.5e-41	2	PP2157	No	No	No	447/744	0.6	..
PP0714	PA1625	782	1e-31	1	PP4162	No	No	No	606/1030	0.58	..
PP2620	PA1661	780	1.3e-31	1	PP4078	No	No	No	598/1017	0.58	..
PP3576	PA3900	780	1.4e-31	1	PP0351	No	No	No	584/954	0.61	..
PP2557	PA0285	779	9.1e-31	1	PP0218	No	No	No	477/778	0.61	..
PP3287	PA1544	777	2.5e-31	1	PP4265	No	No	No	421/693	0.6	..
PP4227	PA2480	773	2.1e-31	1	PP4224	No	No	No	243/337	0.72	..
PP3656	PA3038	771	1.4e-43	2	PP1419	No	No	No	349/555	0.62	..
PP1103	PA3272	768	5.4e-27	1	PP1061	No	No	No	1214/2160	0.56	..
PP3346	PA4506	767	5.3e-31	1	PP0878	No	No	No	471/781	0.6	..
PP1688	PA4174	766	6.2e-31	1	PP1853	No	No	No	494/833	0.59	..
PP3025	PA3665	764	1.1e-30	1	PP3023	No	No	No	380/619	0.61	..
PP0703	PA0471	760	1.1e-30	1	PP0351	No	No	No	578/983	0.58	..
PP3567	PA0123	759	1.3e-30	1	PP1164	No	No	No	521/855	0.6	..
PP0267	PA4837	758	5.7e-27	1	PP3325	No	No	No	1076/1951	0.55	..
PP1411	PA2870	758	5.5e-28	1	PP3932	No	No	No	840/1474	0.56	..
PP3116	PA3007	757	2.4e-30	1	PP2143	No	No	No	387/626	0.61	..
PP3084	PA1910	757	1.1e-26	1	PP2590	No	No	No	1345/2471	0.54	..
PP3658	PA4900	757	1.8e-29	1	PP3165	No	No	No	357/587	0.6	..
PP2178	PA5522	750	1e-28	1	PP4547	No	No	No	762/1344	0.56	..
PP0382	PA3598	749	4.1e-30	1	PP3846	No	Yes	No	471/763	0.61	..
PP2734	PA5546	748	3.1e-30	1	PP5365	No	No	No	570/959	0.59	..
PP2551	PA1223	747	4.6e-30	1	PP2046	No	No	No	519/867	0.59	..
PP1155	PA1120	747	3.1e-30	1	PP4670	No	No	No	553/918	0.6	..
PP2038	PA4228	747	5.3e-27	1	PP4063	No	No	No	825/1500	0.55	..
PP0616	PA4861	747	4.8e-30	1	PP4844	No	Yes	No	451/747	0.6	..
PP4154	PA0266	745	8.6e-29	1	PP0214	No	No	No	755/1334	0.56	..
PP0664	PA3736	745	3.9e-30	1	PP1470	No	Yes	No	427/719	0.59	..
PP3193	PA1503	744	1.3e-29	1	PP4296	No	No	No	296/441	0.67	..
PP2550	PA0964	740	1.1e-29	1	PP1214	No	No	No	438/706	0.62	..
PP2097	PA0290	733	3.1e-28	1	PP0216	No	No	No	521/884	0.58	..
PP3283	PA4980	732	2.5e-29	1	PP3726	No	Yes	No	470/789	0.59	..
PP3393	PA3592	732	1.6e-29	1	PP3001	No	No	No	592/1014	0.58	..
PP0798	PA2870	732	1.3e-26	1	PP3932	No	No	No	576/975	0.59	..
PP0270	PA3191	723	1e-26	1	PP1013	No	No	No	709/1236	0.57	..
PP3734	PA0041	722	8.9e-25	1	PP4243	No	No	No	950/1757	0.54	..
PP2077	PA5277	722	4.4e-29	1	PP5227	No	Yes	No	598/1027	0.58	..
PP3490	PA0041	718	5.2e-24	1	PP4243	No	No	No	3304/6227	0.53	..
PP0041	PA3690	712	8e-25	1	PP5139	No	No	No	554/956	0.57	..
PP5375	PA0032	710	2.1e-28	1	PP0079	No	No	No	530/913	0.58	..
PP4074	PA1657	707	5.2e-28	1	PP2624	No	No	No	315/487	0.64	..
PP0665	PA4189	706	1.5e-25	1	PP2589	No	No	No	822/1466	0.56	..
PP3289	PA5475	705	5.8e-28	1	PP3232	No	No	No	321/516	0.62	..
PP2638	PA4225	704	9.7e-24	1	PP4243	No	No	No	1769/3286	0.53	..
PP2234	PA3782	703	4.2e-28	1	PP5245	No	No	No	545/929	0.58	..
PP3605	PA0056	695	9.9e-28	1	PP1391	No	No	No	505/871	0.57	..
PP2808	PA3424	693	4.1e-25	1	PP0875	No	No	No	751/1311	0.57	..
PP3299	PA3521	688	1.5e-24	1	PP3427	No	No	No	788/1415	0.55	..
PP3345	PA1807	687	8.3e-27	1	PP4150	No	No	No	417/702	0.59	..
PP2714	PA2480	686	6.2e-25	1	PP4224	No	No	No	614/1099	0.55	..
PP3545	PA2177	685	8.1e-24	1	PP3835	No	No	No	827/1493	0.55	..
PP1667	PA1007	683	3e-27	1	PP1234	No	No	No	623/1096	0.56	..
PP3412	PA0034	682	5.7e-27	1	PP1090	No	No	No	280/434	0.64	..
PP1806	PA4457	682	1.5e-39	2	PP0957	No	No	No	426/719	0.59	..
PP2196	PA1421	682	3.7e-27	1	PP4523	No	Yes	No	542/932	0.58	..
PP3814	PA0604	682	3.4e-27	1	PP0412	No	No	No	600/1046	0.57	..
PP3196	PA3321	679	5.3e-27	1	PP3608	No	No	No	527/914	0.57	..
PP3934	PA1961	676	7.1e-27	1	PP2865	No	No	No	536/905	0.59	..
PP3366	PA3433	674	9.1e-27	1	PP4627	No	No	No	536/907	0.59	..
PP3671	PA4167	670	1.5e-26	1	PP2368	No	No	No	494/824	0.59	..
PP4461	PA0229	669	2.9e-24	1	PP1378	No	Yes	No	695/1236	0.56	..
PP3486	PA4226	668	8.8e-23	1	PP4219	No	No	No	994/1765	0.56	..
PP3349	PA2472	667	3e-24	1	PP1376	No	No	No	697/1226	0.56	..
PP3645	PA0231	667	2.1e-26	1	PP1380	No	No	No	487/815	0.59	..
PP3003	PA0245	666	4.2e-26	1	PP2407	No	Yes	No	274/420	0.65	..
PP3062	PA0041	664	6.6e-22	1	PP4243	No	No	No	1860/3434	0.54	..
PP3174	PA1739	663	2.6e-26	1	PP3370	No	No	No	435/714	0.6	..
PP0572	PA1973	662	2.6e-22	1	PP0381	No	No	No	1178/2116	0.55	..
PP2913	PA5243	659	3.8e-26	1	PP3322	No	Yes	No	467/784	0.59	..
PP1930	PA2277	656	1.5e-25	1	PP2718	No	No	No	230/340	0.67	..
PP4630	PA4659	653	8e-26	1	PP0740	No	No	No	529/889	0.59	..
PP3201	PA3080	652	7.3e-26	1	PP2018	No	No	No	590/1019	0.57	..
PP5138	PA1309	652	9.3e-26	1	PP2210	No	No	No	492/842	0.58	..
PP0234	PA0291	651	1.3e-30	2	PP2058	No	No	No	609/1089	0.55	..
PP1957	PA3498	651	9.3e-26	1	PP3737	No	No	No	529/933	0.56	..
PP0618	PA4859	651	9.3e-26	1	PP4842	No	Yes	No	505/867	0.58	..
PP3304	PA3573	651	6.3e-24	1	PP0589	No	No	No	619/1125	0.55	..
PP3515	PA1874	650	1.2e-21	1	PP0806	No	Yes	No	1132/2059	0.54	..
PP2503	PA4089	648	1.6e-25	1	PP1914	No	No	No	424/693	0.61	..
PP2668	PA3254	647	1.4e-25	1	PP1722	No	No	No	405/679	0.59	..
PP2930	PA2683	639	3.2e-25	1	PP3446	No	No	No	545/945	0.57	..
PP3535	PA1338	638	1.2e-21	1	PP4659	No	Yes	No	962/1723	0.55	..
PP0667	PA2468	635	9e-25	1	PP0162	No	No	No	329/523	0.62	..
PP3358	PA2013	633	7.2e-25	1	PP4066	No	No	No	443/759	0.58	..
PP4085	PA2684	632	2.4e-20	1	PP4243	No	No	No	1066/1942	0.54	..
PP2916	PA4055	628	1.5e-24	1	PP0515	No	Yes	No	344/575	0.59	..
PP3612	PA1322	628	6.6e-34	2	PP0861	No	No	No	820/1472	0.55	..
PP3560	PA1309	623	1.9e-24	1	PP2210	No	No	No	497/853	0.58	..
PP1708	PA3128	618	3.7e-24	1	PP3547	No	No	No	452/753	0.6	..
PP2176	PA0784	618	3e-24	1	PP0661	No	No	No	532/915	0.58	..
PP3242	PA3702	617	2.2e-23	1	PP1494	No	No	No	369/634	0.58	..
PP2635	PA4226	616	5.9e-20	1	PP4219	No	No	No	1432/2651	0.54	..
PP0615	PA4909	611	7.9e-24	1	PP4863	No	Yes	No	253/382	0.66	..
PP3430	PA1243	610	6e-20	1	PP2354	No	No	No	740/1343	0.55	..
PP3108	PA3327	610	2.5e-19	1	PP4220	No	No	No	1464/2678	0.54	..
PP3371	PA0930	610	4e-21	1	PP1652	No	No	No	698/1226	0.56	..
PP4848	PA4760	607	9.3e-24	1	PP4726	No	No	No	427/734	0.58	..
PP1044	PA0041	606	7.9e-20	1	PP4243	No	No	No	940/1674	0.56	..
PP2516	PA2469	605	2.5e-23	1	PP2832	No	No	No	555/940	0.59	..
PP4019	PA0041	605	1.3e-19	1	PP4243	No	No	No	1061/1921	0.55	..
PP3203	PA2314	604	4.2e-21	1	PP2392	No	No	No	728/1250	0.58	..
PP3348	PA0290	603	2e-23	1	PP0216	No	No	No	297/465	0.63	..
PP2833	PA2469	602	1.6e-23	1	PP2832	No	No	No	536/928	0.57	..
PP3069	PA1973	601	1.9e-19	1	PP0381	No	No	No	1215/2231	0.54	..
PP2784	PA2003	599	2.6e-23	1	PP3073	No	No	No	457/778	0.58	..
PP0125	PA5491	597	8.3e-23	1	PP3332	No	No	No	197/285	0.69	..
PP1192	PA1428	595	7e-23	1	PP2073	No	No	No	265/413	0.64	..
PP3356	PA4226	593	3.2e-19	1	PP4219	No	No	No	1027/1855	0.55	..
PP1880	PA0041	589	9e-19	1	PP4243	No	No	No	1031/1871	0.55	..
PP2567	PA1622	586	8.9e-23	1	PP4164	No	No	No	476/818	0.58	..
PP3565	PA3665	584	1.5e-22	1	PP3023	No	No	No	368/622	0.59	..
PP2766	PA2984	584	9.2e-20	1	PP1897	No	No	No	662/1168	0.56	..
PP2577	PA4689	582	6.2e-19	1	PP0599	No	No	No	562/999	0.56	..
PP3274	PA5411	580	1.3e-20	1	PP0316	No	No	No	626/1091	0.57	..
PP2565	PA4225	580	2e-18	1	PP4243	No	No	No	872/1574	0.55	..
PP3478	PA1868	580	1.1e-18	1	PP1046	No	No	No	906/1661	0.54	..
PP3270	PA4844	576	1.7e-18	1	PP0562	No	No	No	690/1250	0.55	..
PP2924	PA0041	575	8.4e-19	1	PP4243	No	No	No	653/1132	0.57	..
PP3222	PA4503	574	2.6e-22	1	PP0881	No	No	No	334/545	0.61	..
PP5306	PA0969	573	4.3e-22	1	PP1219	No	No	No	183/255	0.71	..
PP2493	PA5319	572	4.9e-22	1	PP5284	No	No	No	288/454	0.63	..
PP3570	PA2291	571	4.4e-25	2	PP1019	No	No	No	655/1163	0.56	..
PP1775	PA3614	571	7.2e-19	1	PP3291	No	No	No	485/830	0.58	..
PP0866	PA0150	570	4.1e-22	1	PP4607	No	No	No	556/957	0.58	..
PP0228	PA3816	568	6.4e-22	1	PP0840	No	Yes	No	204/299	0.68	..
PP2413	PA3311	566	3.5e-18	1	PP1144	No	No	No	696/1240	0.56	..
PP1483	PA3608	565	7.6e-22	1	PP5178	No	No	No	501/881	0.56	..
PP2933	PA1033	565	1.1e-21	1	PP4104	No	No	No	313/494	0.63	..
PP4755	PA0470	563	1.1e-17	1	PP0350	No	No	No	727/1309	0.55	..
PP3200	PA3082	561	5.8e-18	1	PP0765	No	No	No	937/1680	0.55	..
PP2642	PA5431	561	2.8e-18	1	PP5342	No	No	No	689/1245	0.55	..
PP3130	PA2462	561	2.4e-17	1	PP0806	No	No	No	1143/2118	0.53	..
PP3093	PA0079	560	1.8e-18	1	PP2617	No	No	No	642/1147	0.55	..
PP1007	PA1911	559	1.8e-21	1	PP0351	No	No	No	565/974	0.58	..
PP1696	PA1352	559	8.1e-19	1	PP0503	No	No	No	691/1232	0.56	..
PP3949	PA0243	559	1.9e-21	1	PP3527	No	No	No	327/551	0.59	..
PP2794	PA1470	555	2.6e-21	1	PP2783	No	No	No	423/732	0.57	..
PP2366	PA4136	554	2e-18	1	PP0589	No	No	No	670/1192	0.56	..
PP1354	PA3573	553	1.9e-18	1	PP0589	No	No	No	393/680	0.57	..
PP0369	PA1851	552	2e-18	1	PP3242	No	No	No	626/1107	0.56	..
PP3342	PA1417	551	1.1e-17	1	PP1394	No	No	No	721/1285	0.56	..
PP2750	PA4860	549	7.3e-19	1	PP4843	No	Yes	No	557/963	0.57	..
PP3765	PA4315	547	1.2e-20	1	PP1366	No	No	No	225/353	0.63	..
PP5136	PA1232	545	3.4e-17	1	PP2028	No	No	No	993/1810	0.54	..
PP3632	PA1998	545	5.9e-21	1	PP3121	No	No	No	483/865	0.55	..
PP2463	PA3266	544	2.9e-20	1	PP0985	No	No	No	154/203	0.75	..
PP0929	PA4000	541	1.1e-20	1	PP4804	No	No	No	213/320	0.66	..
PP2599	PA2727	538	1.8e-16	1	PP5242	No	No	No	960/1733	0.55	..
PP2918	PA2542	538	1.4e-16	1	PP2893	No	No	No	1100/2003	0.54	..
PP1847	PA4221	538	1.2e-16	1	PP4217	No	No	No	1146/2108	0.54	..
PP2608	PA0025	537	1.5e-20	1	PP0074	No	Yes	No	441/747	0.59	..
PP3601	PA4225	537	9.8e-17	1	PP4243	No	Yes	No	905/1626	0.55	..
PP3758	PA3044	536	3.6e-17	1	PP2100	No	No	No	658/1198	0.54	..
PP0617	PA1072	536	4.9e-18	1	PP1139	No	Yes	No	512/904	0.56	..
PP1259	PA0129	534	6.3e-17	1	PP0284	No	No	No	768/1386	0.55	..
PP1882	PA2462	533	1.1e-15	1	PP0806	No	No	No	1561/2872	0.54	..
PP0805	PA1876	533	8.5e-17	1	PP0804	No	No	No	819/1462	0.56	..
PP4749	PA5075	532	2.2e-20	1	PP5023	No	No	No	320/533	0.6	..
PP1099	PA3266	528	1.5e-19	1	PP0985	No	No	No	152/210	0.72	..
PP3225	PA3896	527	1.1e-18	1	PP1261	No	No	No	361/604	0.59	..
PP4454	PA2060	526	6.1e-20	1	PP4149	No	No	No	438/746	0.58	..
PP1486	PA2711	523	3.3e-17	1	PP0873	No	No	No	523/926	0.56	..
PP2906	PA1636	523	2.6e-16	1	PP4158	No	No	No	725/1289	0.56	..
PP2701	PA2921	523	2.2e-18	1	PP2539	No	No	No	425/737	0.57	..
PP2127	PA1979	523	8.3e-20	1	PP2671	No	No	No	405/671	0.6	..
PP2566	PA2424	521	3.9e-15	1	PP4243	No	No	No	2251/4207	0.53	..
PP2811	PA3422	520	4e-16	1	PP0765	No	No	No	700/1277	0.54	..
PP0176	PA4226	519	1.2e-15	1	PP4219	No	No	No	1119/2055	0.54	..
PP3869	PA2462	514	1.2e-15	1	PP0806	No	No	No	814/1466	0.55	..
PP5367	PA0129	513	8.7e-19	1	PP0284	No	No	No	171/249	0.68	..
PP4071	PA1669	513	4.7e-15	1	PP3091	No	No	No	975/1761	0.55	..
PP0354	PA1874	512	2.4e-15	1	PP0806	No	No	No	842/1507	0.55	..
PP2649	PA2469	512	4.1e-18	1	PP2832	No	No	No	528/937	0.56	..
PP3223	PA3456	511	1.1e-15	1	PP1751	No	No	No	917/1655	0.55	..
PP3447	PA2880	511	3.6e-19	1	PP3512	No	No	No	229/371	0.61	..
PP2837	PA2262	507	6.1e-16	1	PP3377	No	No	No	679/1197	0.56	..
PP3361	PA0895	506	2.9e-15	1	PP4481	No	No	No	676/1210	0.55	..
PP4041	PA2462	506	4.5e-15	1	PP0806	No	No	No	953/1761	0.54	..
PP2636	PA4807	506	3.6e-15	1	PP0494	No	No	No	956/1723	0.55	..
PP3518	PA3914	505	8.6e-16	1	PP2123	No	No	No	695/1235	0.56	..
PP4595	PA3965	505	6.9e-19	1	PP4776	No	No	No	297/491	0.6	..
PP5009	PA2462	504	2.2e-14	1	PP0806	No	No	No	2030/3765	0.53	..
PP2513	PA0793	504	3.3e-16	1	PP2337	No	No	No	538/930	0.57	..
PP2747	PA1646	502	4e-16	1	PP1819	No	No	No	570/1001	0.56	..
PP2745	PA4328	502	9e-18	1	PP3237	No	No	No	516/914	0.56	..
PP2395	PA0151	500	2.1e-14	1	PP4606	No	No	No	1070/1942	0.55	..
PP1851	PA5029	500	3.2e-17	1	PP5071	No	No	No	540/946	0.57	..
PP3735	PA4192	500	7.9e-19	1	PP1068	No	No	No	376/628	0.59	..
PP3864	PA2435	498	2.5e-15	1	PP4261	No	No	No	596/1076	0.55	..
PP3301	PA0156	498	6.6e-16	1	PP5175	No	No	No	586/1059	0.55	..
PP3564	PA0893	497	1.8e-16	1	PP4482	No	No	No	507/883	0.57	..
PP1053	PA2439	497	1.6e-15	1	PP4053	No	No	No	595/1045	0.56	..
PP4445	PA1938	495	1.2e-18	1	PP4420	No	No	No	301/504	0.59	..
PP0486	PA4165	494	4e-15	1	PP5342	No	No	No	588/1036	0.56	..
PP2126	PA3879	491	2.3e-18	1	PP4099	No	No	No	275/436	0.63	..
PP4316	PA0316	490	6.9e-16	1	PP5155	No	No	No	520/917	0.56	..
PP2740	PA4659	489	6.4e-17	1	PP0740	No	No	No	521/930	0.56	..
PP5236	PA0185	489	1.7e-14	1	PP0239	No	No	No	913/1668	0.54	..
PP2711	PA1379	488	2.5e-18	1	PP2503	No	No	No	336/574	0.58	..
PP2212	PA2542	487	9.5e-14	1	PP2893	No	No	No	1915/3569	0.53	..
PP2816	PA4596	486	4.9e-18	1	PP2820	No	No	No	292/486	0.6	..
PP5157	PA0314	485	3.6e-18	1	PP0227	No	No	No	201/313	0.64	..
PP3693	PA4315	484	8.3e-18	1	PP1366	No	No	No	232/368	0.63	..
PP3175	PA1781	482	2.6e-14	1	PP1705	No	No	No	442/775	0.57	..
PP3663	PA4929	476	3.1e-14	1	PP4670	No	No	No	638/1153	0.55	..
PP3343	PA4222	473	9.4e-15	1	PP2596	No	No	No	539/949	0.56	..
PP2947	PA4315	473	2.6e-17	1	PP1366	No	No	No	199/304	0.65	..
PP1105	PA4226	473	1e-13	1	PP4219	No	No	No	931/1663	0.55	..
PP2040	PA3467	471	3.5e-14	1	PP3165	No	No	No	743/1353	0.54	..
PP2394	PA4489	471	5.4e-13	1	PP4243	No	No	No	1481/2721	0.54	..
PP4921	PA0185	470	4.7e-14	1	PP0239	No	No	No	610/1069	0.57	..
PP3578	PA0041	470	1.5e-13	1	PP4243	No	Yes	No	878/1609	0.54	..
PP4760	PA5234	469	7.5e-15	1	PP5210	No	No	No	405/701	0.57	..
PP3184	PA1874	467	6.3e-13	1	PP0806	No	No	No	1845/3472	0.53	..
PP3489	PA4225	467	2.6e-13	1	PP4243	No	No	No	960/1795	0.53	..
PP3589	PA5518	466	7.6e-14	1	PP5246	No	Yes	No	622/1106	0.56	..
PP5256	PA1408	464	1.6e-13	1	PP0707	No	No	No	498/877	0.56	..
PP2612	PA4226	462	8.2e-13	1	PP4219	No	No	No	992/1806	0.54	..
PP2540	PA1344	461	4.3e-17	1	PP2794	No	Yes	No	391/685	0.57	..
PP3285	PA3753	459	8e-17	1	PP1454	No	No	No	271/450	0.6	..
PP2768	PA4859	459	9e-15	1	PP4842	No	Yes	No	469/813	0.57	..
PP3420	PA4725	459	3.2e-13	1	PP4695	No	No	No	343/567	0.6	..
PP0701	PA3877	458	1.1e-13	1	PP2092	No	No	No	520/910	0.57	..
PP2752	PA0641	457	3.3e-13	1	PP4243	No	No	No	767/1388	0.55	..
PP5131	PA5114	455	4.5e-13	1	PP2024	No	No	No	803/1447	0.55	..
PP3452	PA3343	454	1.1e-13	1	PP1494	No	No	No	520/908	0.57	..
PP3933	PA1824	453	1e-16	1	PP0487	No	No	No	385/675	0.57	..
PP3668	PA4625	452	1.7e-12	1	PP0806	No	Yes	No	1030/1882	0.54	..
PP1579	PA0799	452	1.8e-12	1	PP2146	No	No	No	1122/2095	0.53	..
PP4757	PA3760	451	5.7e-13	1	PP0793	No	Yes	No	655/1198	0.54	..
PP3616	PA4226	451	2.6e-12	1	PP4219	No	No	No	989/1805	0.54	..
PP1298	PA1341	449	9.6e-16	1	PP1070	No	No	No	383/667	0.57	..
PP1112	PA1848	449	2.6e-13	1	PP1202	No	No	No	629/1135	0.55	..
PP1942	PA5189	449	4.7e-14	1	PP2046	No	No	No	445/796	0.55	..
PP1166	PA2478	449	1.4e-13	1	PP4235	No	No	No	405/685	0.59	..
PP3131	PA4393	447	9.4e-13	1	PP1355	No	No	No	767/1386	0.55	..
PP2627	PA0690	447	5.9e-12	1	PP0806	No	No	No	1381/2583	0.53	..
PP0926	PA5466	447	6.8e-14	1	PP3561	No	No	No	507/894	0.56	..
PP2379	PA0114	447	2.3e-16	1	PP0111	No	No	No	275/444	0.61	..
PP4433	PA0229	446	5.7e-13	1	PP1378	No	Yes	No	352/619	0.56	..
PP3633	PA0687	446	1.5e-13	1	PP1048	No	Yes	No	404/682	0.59	..
PP2749	PA4912	446	4.1e-14	1	PP4866	No	Yes	No	506/904	0.55	..
PP3397	PA1874	445	3.6e-12	1	PP0806	No	No	No	1031/1874	0.55	..
PP2657	PA5368	444	3.7e-13	1	PP5328	No	No	No	532/948	0.56	..
PP3451	PA2431	443	1.6e-13	1	PP1150	No	No	No	479/853	0.56	..
PP4968	PA4226	443	2.6e-12	1	PP4219	No	No	No	885/1609	0.55	..
PP3912	PA0799	441	2.3e-12	1	PP2146	No	No	No	927/1671	0.55	..
PP4137	PA4168	441	3.7e-12	1	PP4217	No	No	No	1155/2130	0.54	..
PP3206	PA0172	440	6.3e-13	1	PP4124	No	No	No	558/1009	0.55	..
PP3428	PA0049	439	1.2e-12	1	PP0806	No	No	No	665/1193	0.55	..
PP5069	PA5240	437	1.3e-15	1	PP5215	No	No	No	209/319	0.65	..
PP1109	PA4165	437	1.8e-12	1	PP5342	No	No	No	529/967	0.54	..
PP1753	PA2984	435	1.1e-12	1	PP1897	No	No	No	487/855	0.56	..
PP4938	PA2424	435	2.8e-12	1	PP4243	No	No	No	625/1125	0.55	..
PP3889	PA4978	435	2.7e-12	1	PP3724	No	No	No	731/1338	0.54	..
PP2998	PA4397	433	3.3e-13	1	PP1351	No	Yes	No	525/929	0.56	..
PP2691	PA2135	432	4.6e-12	1	PP2028	No	No	No	604/1104	0.54	..
PP1661	PA4226	429	1.8e-11	1	PP4219	No	No	No	1197/2217	0.53	..
PP3691	PA2728	429	6.3e-22	2	PP0806	No	No	No	399/699	0.57	..
PP3448	PA0041	428	2.1e-11	1	PP4243	No	No	No	1022/1906	0.53	..
PP2593	PA2439	428	2e-12	1	PP4053	No	No	No	424/730	0.58	..
PP2556	PA2055	427	5.1e-12	1	PP1388	No	No	No	579/1046	0.55	..
PP1777	PA5322	427	5.1e-12	1	PP5288	No	Yes	No	525/947	0.55	..
PP2782	PA0895	426	1.7e-11	1	PP4481	No	No	No	354/603	0.58	..
PP4638	PA0088	426	8.8e-12	1	PP3097	No	No	No	860/1566	0.54	..
PP1405	PA3728	426	1.2e-11	1	PP4243	No	No	No	656/1170	0.56	..
PP1697	PA2299	425	7.1e-14	1	PP0204	No	No	No	423/739	0.57	..
PP2052	PA2462	425	2.9e-11	1	PP0806	No	No	No	1117/2077	0.53	..
PP2670	PA4225	425	1.1e-11	1	PP4243	No	No	No	697/1267	0.55	..
PP2651	PA2091	424	6.3e-12	1	PP2092	No	No	No	612/1097	0.55	..
PP2240	PA1113	423	1.8e-11	1	PP2119	No	No	No	963/1749	0.55	..
PP1134	PA5431	423	1.2e-11	1	PP5342	No	No	No	773/1431	0.54	..
PP0288	PA1270	423	1.6e-11	1	PP1150	No	No	No	961/1728	0.55	..
PP4043	PA2480	422	3.3e-12	1	PP4224	No	Yes	No	562/994	0.56	..
PP2632	PA5114	422	2.1e-11	1	PP2024	No	No	No	810/1474	0.54	..
PP0573	PA4625	422	2.6e-11	1	PP0806	No	No	No	732/1339	0.54	..
PP2238	PA0074	422	2.6e-11	1	PP0806	No	No	No	810/1492	0.54	..
PP3340	PA3910	421	2.3e-11	1	PP4772	No	No	No	749/1352	0.55	..
PP2781	PA0017	421	8.8e-12	1	PP0066	No	No	No	683/1238	0.55	..
PP3497	PA0041	421	3.9e-11	1	PP4243	No	No	No	1091/2006	0.54	..
PP4979	PA4982	420	1.7e-12	1	PP3728	No	No	No	410/720	0.56	..
PP3423	PA3101	420	5.4e-15	1	PP1049	No	No	No	258/426	0.6	..
PP2552	PA1238	420	1.2e-11	1	PP2069	No	Yes	No	648/1179	0.54	..
PP0670	PA4903	420	3.7e-12	1	PP3740	No	No	No	500/897	0.55	..
PP2988	PA1137	419	3.1e-12	1	PP5210	No	No	No	289/478	0.6	..
PP3194	PA3920	419	1.7e-11	1	PP0586	No	No	No	713/1297	0.54	..
PP3150	PA1876	419	3.4e-11	1	PP0804	No	No	No	901/1654	0.54	..
PP2828	PA1874	419	2.4e-11	1	PP0806	No	No	No	705/1255	0.56	..
PP2034	PA5508	418	1.1e-11	1	PP4547	No	No	No	646/1145	0.56	..
PP2760	PA2431	418	9.6e-12	1	PP1150	No	No	No	616/1085	0.56	..
PP2737	PA1379	417	2e-13	1	PP2503	No	No	No	379/660	0.57	..
PP1246	PA1874	417	5.1e-11	1	PP0806	No	No	No	871/1599	0.54	..
PP3816	PA3253	415	5.4e-13	1	PP1723	No	No	No	409/731	0.55	..
PP2444	PA2497	415	1.9e-12	1	PP3534	No	No	No	477/845	0.56	..
PP2231	PA2914	413	8.3e-12	1	PP2417	No	No	No	441/760	0.58	..
PP3644	PA1186	413	7.3e-12	1	PP2485	No	No	No	509/883	0.57	..
PP2791	PA0345	413	1.5e-11	1	PP5133	No	No	No	561/1000	0.56	..
PP3394	PA2011	412	3.7e-12	1	PP3540	No	No	No	514/917	0.56	..
PP5297	PA0185	412	4.2e-11	1	PP0239	No	No	No	722/1304	0.55	..
PP2804	PA3586	412	3.7e-12	1	PP1064	No	No	No	370/638	0.57	..
PP2769	PA1316	409	1.7e-11	1	PP4951	No	Yes	No	555/1001	0.55	..
PP5385	PA1759	408	5.1e-11	1	PP0767	No	No	No	650/1164	0.55	..
PP3722	PA4930	408	2.3e-11	1	PP5269	No	Yes	No	614/1092	0.56	..
PP2732	PA0041	406	1.2e-10	1	PP4243	No	No	No	822/1484	0.55	..
PP5260	PA0755	404	6.1e-11	1	PP1419	No	No	No	702/1249	0.56	..
PP1042	PA4734	404	1e-11	1	PP4703	No	No	No	448/778	0.57	..
PP3464	PA1337	403	4.7e-11	1	PP2453	No	No	No	509/911	0.55	..
PP3369	PA5508	402	1.8e-11	1	PP4547	No	No	No	438/774	0.56	..
PP2076	PA2390	402	3.1e-10	1	PP4210	No	No	No	936/1719	0.54	..
PP3360	PA2442	401	4.3e-11	1	PP0986	No	No	No	515/913	0.56	..
PP3388	PA3729	401	3.4e-10	1	PP4276	No	No	No	935/1723	0.54	..
PP5373	PA2518	401	6.4e-11	1	PP3161	No	No	No	529/964	0.54	..
PP1707	PA4226	400	6.3e-11	1	PP4219	No	No	No	466/827	0.56	..
PP1132	PA3773	399	6.5e-11	1	PP4108	No	Yes	No	535/957	0.55	..
PP4519	PA0041	399	2e-10	1	PP4243	No	No	No	751/1359	0.55	..
PP1953	PA4098	396	2.9e-12	1	PP2002	No	No	No	402/708	0.56	..
PP2658	PA5367	396	5.4e-11	1	PP5327	No	No	No	288/492	0.58	..
PP2836	PA3327	396	2.1e-10	1	PP4220	No	No	No	710/1266	0.56	..
PP3127	PA3482	396	2.5e-10	1	PP1097	No	No	No	608/1095	0.55	..
PP0348	PA2424	396	8.8e-10	1	PP4243	No	No	No	1556/2925	0.53	..
PP0658	PA0413	395	1.1e-10	1	PP4988	No	No	No	503/895	0.56	..
PP4850	PA2500	395	8.3e-11	1	PP3751	No	No	No	559/1003	0.55	..
PP2427	PA0195	395	8e-11	1	PP2024	No	No	No	435/754	0.57	..
PP4072	PA3272	395	3.2e-10	1	PP1061	No	No	No	811/1471	0.55	..
PP2582	PA0672	394	6e-14	1	PP1005	No	No	No	230/377	0.61	..
PP4924	PA0041	392	3e-09	1	PP4243	No	No	No	533/978	0.54	..
PP2418	PA2371	392	2e-10	1	PP3095	No	No	No	596/1060	0.56	..
PP0928	PA1282	391	1.5e-10	1	PP3377	No	No	No	443/782	0.56	..
PP2834	PA2018	391	5e-10	1	PP3456	No	Yes	No	869/1586	0.54	..
PP3250	PA1238	391	2.4e-10	1	PP2069	No	No	No	563/1019	0.55	..
PP3482	PA1911	390	3.2e-11	1	PP0351	No	No	No	416/711	0.58	..
PP4566	PA5216	390	9.6e-11	1	PP5195	No	No	No	506/918	0.55	..
PP2369	PA5441	390	2e-09	1	PP4052	No	No	No	560/1002	0.55	..
PP4463	PA4475	389	2.8e-11	1	PP0939	No	No	No	303/517	0.58	..
PP2175	PA1470	389	2.3e-12	1	PP2783	No	No	No	367/646	0.56	..
PP1563	PA1417	389	5.4e-10	1	PP1394	No	No	No	709/1300	0.54	..
PP3945	PA5221	389	1.5e-10	1	PP5197	No	No	No	501/889	0.56	..
PP2480	PA2314	389	2.3e-10	1	PP2392	No	No	No	537/958	0.56	..
PP4427	PA0313	388	9.7e-14	1	PP0226	No	No	No	338/590	0.57	..
PP4586	PA0451	387	3e-10	1	PP0200	No	No	No	577/1038	0.55	..
PP3056	PA2472	387	1.2e-10	1	PP1376	No	No	No	465/810	0.57	..
PP0802	PA3468	387	1.3e-10	1	PP4533	No	No	No	515/927	0.55	..
PP3664	PA0041	387	6.9e-10	1	PP4243	No	Yes	No	687/1228	0.55	..
PP1711	PA2728	387	2.2e-10	1	PP0806	No	No	No	377/663	0.56	..
PP1014	PA2539	386	3.6e-10	1	PP1202	No	No	No	580/1021	0.56	..
PP3421	PA2882	386	3.9e-10	1	PP2945	No	No	No	474/832	0.56	..
PP3396	PA2888	386	4.8e-10	1	PP4065	No	No	No	762/1384	0.55	..
PP1040	PA5069	384	2.4e-13	1	PP5017	No	No	No	138/201	0.68	..
PP3654	PA5308	384	2.1e-13	1	PP5271	No	No	No	268/456	0.58	..
PP3461	PA0685	384	8.5e-10	1	PP1046	No	No	No	582/1047	0.55	..
PP0896	PA4475	384	6.9e-11	1	PP0939	No	No	No	450/783	0.57	..
PP3496	PA3123	383	3e-13	1	PP2247	No	No	No	235/385	0.61	..
PP3276	PA1497	383	4.5e-11	1	PP4302	No	No	No	329/571	0.57	..
PP3022	PA3269	382	6.3e-11	1	PP2383	No	No	No	464/830	0.55	..
PP1227	PA1262	382	3e-10	1	PP4276	No	No	No	508/917	0.55	..
PP2751	PA0903	381	1.1e-09	1	PP4474	No	No	No	745/1359	0.54	..
PP5241	PA2657	381	1.1e-11	1	PP2347	No	No	No	351/627	0.55	..
PP0717	PA2984	381	5.4e-10	1	PP1897	No	No	No	497/864	0.57	..
PP3029	PA2462	380	2.6e-09	1	PP0806	No	No	No	776/1435	0.54	..
PP2171	PA3665	379	2.7e-13	1	PP3023	No	No	No	307/536	0.57	..
PP3140	PA0333	379	6.7e-10	1	PP1897	No	No	No	607/1082	0.56	..
PP5219	PA5114	379	1.4e-09	1	PP2024	No	No	No	703/1292	0.54	..
PP3205	PA0799	379	5.8e-10	1	PP2146	No	No	No	589/1040	0.56	..
PP1255	PA0401	378	8.2e-10	1	PP4999	No	Yes	No	648/1179	0.54	..
PP3776	PA1054	378	5.7e-10	1	PP2230	No	No	No	336/567	0.59	..
PP5065	PA0799	378	2.9e-09	1	PP2146	No	No	No	862/1578	0.54	..
PP2669	PA4571	377	7.3e-10	1	PP3382	No	No	No	381/673	0.56	..
PP4764	PA2008	377	4.1e-10	1	PP4620	No	No	No	485/853	0.56	..
PP3136	PA3816	377	5e-13	1	PP0840	No	No	No	223/376	0.59	..
PP2386	PA3901	376	4.6e-10	1	PP4613	No	No	No	360/629	0.57	..
PP1565	PA1973	376	1.6e-09	1	PP0381	No	No	No	734/1331	0.55	..
PP2835	PA0262	375	1.2e-09	1	PP2614	No	No	No	483/867	0.55	..
PP2637	PA0072	375	8.3e-10	1	PP1145	No	No	No	597/1083	0.55	..
PP2709	PA2424	375	3.1e-09	1	PP4243	No	No	No	761/1386	0.54	..
PP3942	PA1549	374	3.3e-10	1	PP4261	No	No	No	412/727	0.56	..
PP3652	PA2710	374	4.7e-13	1	PP3021	No	No	No	348/601	0.57	..
PP2872	PA4287	373	4.4e-10	1	PP4853	No	No	No	481/860	0.55	..
PP0407	PA3681	373	4.1e-11	1	PP1511	No	No	No	421/734	0.57	..
PP5060	PA3068	373	1.7e-08	1	PP2080	No	No	No	1545/2894	0.53	..
PP3600	PA4187	372	2e-09	1	PP1376	No	Yes	No	562/1029	0.54	..
PP2787	PA3391	372	7.4e-09	1	PP4261	No	No	No	742/1377	0.53	..
PP2815	PA1331	372	1.9e-09	1	PP3437	No	No	No	696/1248	0.55	..
PP3156	PA2729	372	6.9e-10	1	PP2024	No	No	No	474/840	0.56	..
PP2252	PA4996	371	1.3e-09	1	PP4934	No	No	No	613/1096	0.55	..
PP2055	PA4284	371	2.1e-09	1	PP4673	No	No	No	535/958	0.55	..
PP1248	PA2929	370	1.4e-12	1	PP0699	No	No	No	352/605	0.58	..
PP4033	PA1113	370	1.3e-09	1	PP2119	No	No	No	546/968	0.56	..
PP2641	PA1113	369	5.4e-09	1	PP2119	No	No	No	539/957	0.56	..
PP2387	PA5025	369	1.6e-09	1	PP2528	No	No	No	525/960	0.54	..
PP0828	PA3065	368	9.6e-10	1	PP4813	No	No	No	484/850	0.56	..
PP1257	PA2539	368	1.3e-09	1	PP1202	No	Yes	No	440/781	0.56	..
PP1052	PA0246	368	4.7e-12	1	PP1388	No	No	No	296/496	0.59	..
PP3195	PA1868	367	4.1e-09	1	PP1046	No	No	No	517/905	0.57	..
PP4048	PA1997	367	5.4e-09	1	PP3071	No	No	No	541/962	0.56	..
PP3038	PA4225	367	1.3e-08	1	PP4243	No	No	No	767/1388	0.55	..
PP4623	PA0041	366	2.5e-08	1	PP4243	No	No	No	1420/2634	0.53	..
PP1555	PA3420	365	5.3e-09	1	PP0767	No	No	No	693/1264	0.54	..
PP2761	PA5114	364	3.6e-09	1	PP2024	No	No	No	564/1019	0.55	..
PP4759	PA2355	364	8.6e-10	1	PP2772	No	No	No	414/719	0.57	..
PP3462	PA2044	363	9.6e-09	1	PP2148	No	No	No	853/1563	0.54	..
PP2887	PA5384	363	2.1e-09	1	PP4218	No	Yes	No	507/909	0.55	..
PP3649	PA1520	362	3.7e-10	1	PP4283	No	No	No	356/619	0.57	..
PP4379	PA3333	361	1.9e-09	1	PP4051	No	Yes	No	241/404	0.59	..
PP1072	PA0799	361	4.3e-08	1	PP2146	No	No	No	569/1025	0.55	..
PP2241	PA4818	361	6e-09	1	PP0033	No	No	No	591/1076	0.54	..
PP1195	PA3573	361	8.6e-09	1	PP0589	No	No	No	399/698	0.57	..
PP3149	PA4807	359	6e-09	1	PP0494	No	No	No	463/814	0.56	..
PP3972	PA1330	359	2.9e-09	1	PP2794	No	No	No	263/454	0.57	..
PP3258	PA2507	359	9.2e-10	1	PP3713	No	No	No	335/580	0.57	..
PP2533	PA2135	359	4.2e-09	1	PP2028	No	Yes	No	375/655	0.57	..
PP0383	PA1242	358	1.6e-08	1	PP4113	No	Yes	No	698/1253	0.55	..
PP3188	PA3074	357	9.1e-09	1	PP2028	No	No	No	485/843	0.57	..
PP2822	PA3268	357	1.1e-08	1	PP0867	No	No	No	429/750	0.57	..
PP3943	PA0480	357	1.1e-09	1	PP1380	No	No	No	461/834	0.55	..
PP3190	PA0333	356	4.8e-09	1	PP1897	No	Yes	No	518/955	0.54	..
PP1110	PA3816	355	6.5e-12	1	PP0840	No	No	No	171/266	0.64	..
PP3944	PA1231	355	5.4e-09	1	PP0178	No	Yes	No	509/914	0.55	..
PP3400	PA3303	355	4.8e-10	1	PP2367	No	No	No	345/578	0.59	..
PP3275	PA2091	355	1.6e-11	1	PP2092	No	No	No	317/542	0.58	..
PP2758	PA2283	354	8.4e-09	1	PP2316	No	No	No	608/1083	0.56	..
PP2934	PA0600	354	1.1e-08	1	PP0409	No	No	No	586/1032	0.56	..
PP3514	PA2745	353	1.3e-08	1	PP0572	No	Yes	No	381/676	0.56	..
PP3239	PA5448	353	6.6e-09	1	PP1801	No	No	No	497/862	0.57	..
PP3667	PA3657	353	5.1e-09	1	PP1590	No	No	No	423/766	0.55	..
PP2667	PA5114	352	6.5e-09	1	PP2024	No	No	No	446/788	0.56	..
PP2545	PA3272	352	7.7e-09	1	PP1061	No	No	No	418/725	0.57	..
PP3137	PA0041	352	1.5e-08	1	PP4243	No	No	No	538/974	0.55	..
PP3863	PA1901	352	1.1e-08	1	PP1866	No	No	No	460/827	0.55	..
PP2527	PA2589	352	5.8e-09	1	PP3751	No	No	No	466/830	0.56	..
PP0865	PA2093	352	5.6e-12	1	PP4611	No	No	No	290/491	0.59	..
PP1885	PA4323	351	4.5e-08	1	PP4261	No	No	No	589/1062	0.55	..
PP1406	PA2390	351	1.3e-08	1	PP4210	No	No	No	505/897	0.56	..
PP3756	PA1290	350	5.9e-12	1	PP3527	No	No	No	312/544	0.57	..
PP3592	PA5121	350	1.2e-08	1	PP1728	No	No	No	524/937	0.55	..
PP3516	PA3404	350	1e-08	1	PP2558	No	No	No	450/793	0.56	..
PP3000	PA3302	349	8.2e-12	1	PP4552	No	No	No	235/389	0.6	..
PP3653	PA5249	349	2.3e-11	1	PP0198	No	No	No	283/476	0.59	..
PP3259	PA3462	349	2e-08	1	PP4824	No	No	No	477/842	0.56	..
PP2841	PA1628	348	1.1e-08	1	PP3282	No	No	No	460/822	0.55	..
PP3132	PA1352	348	2.5e-08	1	PP0503	No	No	No	560/1017	0.55	..
PP1170	PA5011	348	7.9e-09	1	PP0342	No	No	No	476/840	0.56	..
PP5081	PA2503	348	1.4e-08	1	PP3095	No	No	No	482/864	0.55	..
PP1567	PA2163	347	3.3e-08	1	PP4052	No	No	No	567/1024	0.55	..
PP3958	PA4977	347	3.5e-08	1	PP1394	No	Yes	No	571/1036	0.55	..
PP3094	PA2654	347	6.3e-09	1	PP3557	No	No	No	409/721	0.56	..
PP3279	PA3860	347	1.4e-09	2	PP4063	No	Yes	No	479/862	0.55	..
PP2372	PA5511	346	2.1e-08	1	PP1401	No	No	No	362/620	0.58	..
PP2744	PA4807	346	2e-08	1	PP0494	No	No	No	480/851	0.56	..
PP1171	PA2462	346	1.6e-08	1	PP0806	No	No	No	462/830	0.55	..
PP2847	PA1313	346	4.5e-11	1	PP4951	No	No	No	334/563	0.59	..
PP5043	PA2181	346	3.2e-08	1	PP3253	No	No	No	298/500	0.59	..
PP4750	PA5155	346	4.5e-10	1	PP0280	No	No	No	262/461	0.56	..
PP2695	PA0191	345	9.2e-09	1	PP3716	No	No	No	281/486	0.57	..
PP1230	PA2077	345	5.5e-08	1	PP0806	No	No	No	817/1512	0.54	..
PP2702	PA4844	344	3.7e-08	1	PP0562	No	No	No	540/958	0.56	..
PP3495	PA3562	344	7.5e-09	1	PP0793	No	No	No	382/670	0.57	..
PP3763	PA5092	343	8.6e-09	1	PP5030	No	Yes	No	383/665	0.57	..
PP4860	PA0077	343	4.8e-08	1	PP3090	No	Yes	No	587/1064	0.55	..
PP3044	PA3910	343	6.1e-08	1	PP4772	No	No	No	385/668	0.57	..
PP3249	PA0525	343	1.7e-08	1	PP2024	No	No	No	393/695	0.56	..
PP1008	PA0149	342	1.5e-11	1	PP4608	No	No	No	236/387	0.6	..
PP2757	PA4772	341	4e-08	1	PP4737	No	No	No	299/523	0.57	..
PP0203	PA4814	340	1.2e-07	1	PP2008	No	No	No	560/1028	0.54	..
PP2429	PA2539	340	8.2e-11	1	PP1202	No	No	No	294/518	0.56	..
PP3465	PA3562	340	1.2e-08	1	PP0793	No	No	No	408/707	0.57	..
PP3055	PA3087	340	1.3e-08	1	PP2013	No	No	No	452/791	0.57	..
PP5240	PA4196	340	1.5e-11	1	PP3551	No	No	No	228/377	0.6	..
PP2033	PA3327	340	1.1e-07	1	PP4220	No	No	No	624/1139	0.54	..
PP2831	PA0344	339	6.2e-08	1	PP5134	No	No	No	411/717	0.57	..
PP3742	PA3035	339	9.8e-11	1	PP1162	No	No	No	341/600	0.56	..
PP0054	PA2269	339	2.3e-08	1	PP3961	No	No	No	481/855	0.56	..
PP2927	PA2867	337	5.7e-08	1	PP2310	No	No	No	345/608	0.56	..
PP2266	PA4225	337	3.6e-07	1	PP4243	No	No	No	1315/2471	0.53	..
PP2962	PA5234	337	3.4e-08	1	PP5210	No	No	No	221/368	0.6	..
PP4770	PA0690	337	3.4e-08	1	PP0806	No	No	No	267/472	0.56	..
PP0657	PA5076	337	1.3e-08	1	PP5024	No	No	No	333/596	0.55	..
PP2518	PA4393	337	6e-08	1	PP1355	No	Yes	No	381/677	0.56	..
PP2923	PA2424	336	6e-08	1	PP4243	No	No	No	500/891	0.56	..
PP2739	PA0285	336	1.7e-10	1	PP0218	No	No	No	186/303	0.61	..
PP2785	PA1429	336	1.2e-07	1	PP2645	No	No	No	676/1236	0.54	..
PP1682	PA2077	336	1.1e-07	1	PP0806	No	No	No	542/957	0.56	..
PP3599	PA3878	336	5.1e-08	1	PP4053	No	Yes	No	322/549	0.58	..
PP2948	PA2897	335	1.2e-07	1	PP4197	No	No	No	397/703	0.56	..
PP1122	PA3526	334	2.4e-08	1	PP1087	No	No	No	420/761	0.55	..
PP2931	PA4036	334	5.1e-08	1	PP0806	No	No	No	374/659	0.56	..
PP4330	PA3311	334	4.4e-07	1	PP1144	No	No	No	876/1610	0.54	..
PP2677	PA2302	334	4.8e-08	1	PP4219	No	No	No	440/779	0.56	..
PP3092	PA1668	333	1.4e-08	1	PP2616	No	No	No	373/657	0.56	..
PP2958	PA5129	332	8.9e-11	1	PP5054	No	No	No	168/265	0.63	..
PP2653	PA1238	332	5e-08	1	PP2069	No	No	No	394/682	0.57	..
PP1811	PA4168	332	1.5e-07	1	PP4217	No	Yes	No	492/871	0.56	..
PP2944	PA5484	331	3.2e-07	1	PP0132	No	No	No	551/989	0.55	..
PP1886	PA4814	331	6.5e-07	1	PP2008	No	No	No	781/1427	0.54	..
PP2066	PA5473	331	4.9e-08	1	PP0145	No	No	No	353/617	0.57	..
PP3231	PA1783	331	1.6e-07	1	PP2092	No	No	No	601/1091	0.55	..
PP4936	PA4011	331	1.3e-07	1	PP4813	No	No	No	585/1058	0.55	..
PP2829	PA1266	331	1.6e-07	1	PP3450	No	No	No	587/1082	0.54	..
PP1193	PA1874	331	1e-08	1	PP0806	No	No	No	331/579	0.57	..
PP3877	PA3297	330	3.3e-07	1	PP4546	No	No	No	798/1464	0.54	..
PP2796	PA3235	330	9e-11	1	PP1742	No	No	No	180/297	0.6	..
PP2886	PA2472	329	2.7e-10	1	PP1376	No	No	No	281/487	0.57	..
PP3256	PA1429	329	3.3e-08	1	PP2645	No	No	No	369/643	0.57	..
PP3139	PA2152	329	2.5e-07	1	PP4059	No	No	No	663/1207	0.54	..
PP4091	PA3704	329	3.4e-07	1	PP1492	No	No	No	479/847	0.56	..
PP3865	PA2665	329	4.1e-07	1	PP0807	No	No	No	797/1480	0.53	..
PP2813	PA5522	328	1.2e-07	1	PP4547	No	No	No	490/872	0.56	..
PP2244	PA5114	328	9.5e-08	1	PP2024	No	No	No	444/800	0.55	..
PP3181	PA1662	328	1.6e-07	1	PP3095	No	No	No	518/935	0.55	..
PP3533	PA3862	328	1e-07	1	PP3455	No	Yes	No	404/728	0.55	..
PP5083	PA4223	328	1.1e-07	1	PP2596	No	No	No	390/683	0.57	..
PP3068	PA3665	328	5.5e-11	1	PP3023	No	No	No	132/194	0.68	..
PP3768	PA1990	327	1.1e-07	1	PP0375	No	Yes	No	423/747	0.56	..
PP2377	PA3395	327	1.1e-07	1	PP5246	No	No	No	435/789	0.55	..
PP0800	PA4222	327	7.2e-08	1	PP2596	No	No	No	305/516	0.59	..
PP2286	PA1091	327	8.3e-07	1	PP4243	No	No	No	779/1437	0.54	..
PP3743	PA5462	326	1.4e-10	1	PP0151	No	No	No	174/283	0.61	..
PP1659	PA1131	326	2.8e-07	1	PP4695	No	No	No	576/1033	0.55	..
PP2733	PA1313	326	3.7e-10	1	PP4951	No	No	No	270/466	0.57	..
PP3634	PA4051	326	5.9e-08	1	PP0519	No	No	No	362/619	0.58	..
PP1627	PA2424	325	3.6e-07	1	PP4243	No	No	No	547/980	0.55	..
PP2591	PA0178	325	2.3e-07	1	PP4338	No	No	No	505/926	0.54	..
PP2889	PA2110	325	5.4e-08	1	PP4575	No	No	No	317/545	0.58	..
PP0087	PA0060	325	2e-10	1	PP0090	No	No	No	117/170	0.68	..
PP1887	PA3065	324	1.1e-06	1	PP4813	No	No	No	524/954	0.54	..
PP5244	PA1619	324	2.5e-10	1	PP5187	No	No	No	220/375	0.58	..
PP3511	PA4411	323	2.5e-07	1	PP1338	No	Yes	No	525/940	0.55	..
PP3579	PA0458	323	4.7e-08	1	PP4951	No	No	No	349/598	0.58	..
PP3941	PA2500	322	4.4e-08	1	PP3751	No	No	No	308/533	0.57	..
PP2960	PA0564	322	1.4e-07	1	PP3481	No	No	No	384/689	0.55	..
PP3787	PA5021	322	2.3e-07	1	PP5066	No	No	No	332/572	0.58	..
PP1552	PA0744	321	7.9e-08	1	PP1412	No	No	No	283/477	0.59	..
PP1883	PA5203	321	9.5e-07	1	PP0243	No	No	No	773/1407	0.54	..
PP3480	PA3185	321	2.6e-09	1	PP1020	No	No	No	303/525	0.57	..
PP1803	PA1211	321	5.6e-08	1	PP2760	No	No	No	323/558	0.57	..
PP3487	PA2717	321	3.9e-08	1	PP4021	No	No	No	359/627	0.57	..
PP2634	PA0246	320	1.2e-07	1	PP1388	No	No	No	424/745	0.56	..
PP1057	PA4808	320	7.3e-10	1	PP0493	No	No	No	314/544	0.57	..
PP0768	PA4844	320	9.1e-07	1	PP0562	No	No	No	480/853	0.56	..
PP1951	PA4098	320	7.7e-08	1	PP2002	No	No	No	228/388	0.58	..
PP2514	PA1259	320	1.3e-07	1	PP0806	No	No	No	314/553	0.56	..
PP2678	PA4859	319	2.1e-07	1	PP4842	No	No	No	509/929	0.54	..
PP2742	PA2762	319	2.6e-10	1	PP4665	No	No	No	205/341	0.6	..
PP3278	PA2633	319	1.9e-07	1	PP4115	No	No	No	355/629	0.56	..
PP2676	PA4855	319	2.8e-07	1	PP4823	No	No	No	509/896	0.56	..
PP4046	PA2243	319	3.7e-07	1	PP2605	No	No	No	383/674	0.56	..
PP4110	PA2071	319	2e-07	1	PP4111	No	No	No	71/80	0.88	..
PP2908	PA0797	319	4.5e-08	1	PP2333	No	No	No	351/617	0.56	..
PP4834	PA2197	318	2.1e-07	1	PP2476	No	No	No	342/597	0.57	..
PP3603	PA2542	318	2.7e-07	1	PP2893	No	No	No	446/786	0.56	..
PP1041	PA5068	318	3.9e-10	1	PP5016	No	No	No	128/195	0.65	..
PP1843	PA3777	317	4.2e-07	1	PP1027	No	No	No	479/865	0.55	..
PP3290	PA1646	317	4.4e-07	1	PP1819	No	No	No	441/775	0.56	..
PP3112	PA3172	317	3.1e-10	1	PP1764	No	No	No	193/316	0.61	..
PP2245	PA4054	316	4.2e-08	1	PP0516	No	No	No	304/536	0.56	..
PP3353	PA2424	315	6.3e-07	1	PP4243	No	No	No	449/789	0.56	..
PP2248	PA3457	315	2.9e-07	1	PP2024	No	No	No	413/735	0.56	..
PP2262	PA1352	315	4e-07	1	PP0503	No	No	No	505/918	0.55	..
PP4564	PA1099	315	3.9e-07	1	PP4371	No	No	No	457/819	0.55	..
PP4467	PA3594	315	2.8e-07	1	PP3179	No	No	No	123/186	0.66	..
PP2233	PA0487	315	1.1e-09	1	PP0360	No	No	No	277/480	0.57	..
PP3610	PA2402	314	4.7e-07	1	PP4220	No	No	No	350/619	0.56	..
PP3398	PA5418	314	1.8e-09	1	PP0325	No	No	No	282/472	0.59	..
PP1106	PA3941	313	1.1e-07	1	PP4761	No	No	No	275/461	0.59	..
PP3180	PA2302	313	1.1e-06	1	PP4219	No	No	No	417/740	0.56	..
PP1541	PA4283	313	7e-07	1	PP4672	No	No	No	170/293	0.58	..
PP0620	PA1373	313	3.1e-07	1	PP3303	No	No	No	379/662	0.57	..
PP4426	PA0313	313	6.1e-08	1	PP0226	No	No	No	265/470	0.56	..
PP2770	PA5199	312	1.3e-06	1	PP0247	No	No	No	586/1083	0.54	..
PP4632	PA3546	312	3.4e-07	1	PP1282	No	No	No	254/432	0.58	..
PP2263	PA2472	312	4.3e-07	1	PP1376	No	No	No	442/807	0.54	..
PP0673	PA1910	311	2.4e-09	1	PP2590	No	No	No	219/361	0.6	..
PP1699	PA3305	311	6.7e-07	1	PP1150	No	No	No	473/847	0.55	..
PP2424	PA2032	311	1.1e-08	1	PP5275	No	No	No	327/559	0.58	..
PP2630	PA5538	311	5.3e-07	1	PP4897	No	No	No	423/757	0.55	..
PP0700	PA3376	311	4.6e-07	1	PP3220	No	No	No	373/646	0.57	..
PP0426	PA0041	311	1.5e-06	1	PP4243	No	No	No	559/1015	0.55	..
PP1798	PA4974	310	1.9e-06	1	PP4923	No	No	No	208/350	0.59	..
PP2572	PA5207	309	2.4e-07	1	PP2092	No	No	No	336/598	0.56	..
PP3439	PA0211	309	4.5e-07	1	PP1108	No	No	No	355/621	0.57	..
PP0995	PA0345	308	2.8e-07	1	PP5133	No	No	No	218/364	0.59	..
PP1399	PA5253	308	2.1e-09	1	PP0194	No	No	No	168/274	0.61	..
PP3733	PA2330	307	1.2e-06	1	PP3638	No	No	No	357/632	0.56	..
PP2977	PA1938	307	6.1e-07	1	PP4420	No	No	No	331/581	0.56	..
PP3859	PA1595	306	3.3e-07	1	PP2542	No	No	No	300/525	0.57	..
PP3387	PA3641	306	1.3e-06	1	PP0496	No	No	No	546/993	0.54	..
PP2507	PA0117	306	2.6e-07	1	PP2881	No	No	No	414/744	0.55	..
PP1794	PA3310	306	3.2e-06	1	PP4592	No	No	No	584/1071	0.54	..
PP2639	PA2424	306	1.7e-06	1	PP4243	No	No	No	356/630	0.56	..
PP4028	PA1824	306	1.6e-09	1	PP0487	No	No	No	72/84	0.85	..
PP3812	PA2378	305	2.2e-06	1	PP3622	No	No	No	237/397	0.59	..
PP4057	PA1877	305	2e-06	1	PP0803	No	No	No	455/808	0.56	..
PP1290	PA1186	304	2.2e-06	1	PP2485	No	No	No	428/752	0.56	..
PP1512	PA2480	304	3.6e-07	1	PP4224	No	No	No	298/521	0.57	..
PP2380	PA3785	304	8.8e-10	1	PP4836	No	No	No	194/323	0.6	..
PP3459	PA1101	303	3e-06	1	PP4369	No	No	No	497/897	0.55	..
PP3779	PA3398	303	1.2e-06	1	PP1637	No	No	No	309/555	0.55	..
PP1056	PA2503	303	9.6e-07	1	PP3095	No	No	No	375/645	0.58	..
PP2515	PA5438	303	7.1e-07	1	PP5350	No	No	No	379/684	0.55	..
PP1245	PA2494	303	2.1e-06	1	PP3426	No	No	No	473/861	0.54	..
PP1577	PA1091	303	1.2e-05	1	PP4243	No	No	No	951/1758	0.54	..
PP5386	PA2522	302	4.4e-06	1	PP0045	No	No	No	522/943	0.55	..
PP2555	PA2941	302	2.3e-07	1	PP3505	No	No	No	348/613	0.56	..
PP2531	PA3919	302	2.3e-06	1	PP1291	No	Yes	No	290/514	0.56	..
PP4745	PA3704	302	6.1e-06	1	PP1492	No	No	No	476/847	0.56	..
PP4025	PA3704	302	6.1e-06	1	PP1492	No	No	No	476/847	0.56	..
PP0637	PA3704	302	6.1e-06	1	PP1492	No	No	No	476/847	0.56	..
PP3186	PA2055	302	6.7e-07	1	PP1388	No	No	No	370/649	0.57	..
PP2220	PA4723	302	1.2e-09	1	PP4693	No	No	No	222/385	0.57	..
PP3185	PA1017	301	8.2e-07	1	PP4243	No	No	No	353/623	0.56	..
PP3054	PA2945	300	2.4e-06	1	PP3508	No	No	No	328/573	0.57	..
PP4070	PA3571	300	4.2e-09	1	PP4547	No	No	No	306/522	0.58	..
PP1247	PA0345	300	5.6e-06	1	PP5133	No	No	No	430/768	0.55	..
PP3438	PA1316	299	4.4e-07	1	PP4951	No	No	No	339/586	0.57	..
PP0654	PA1901	299	1.9e-06	1	PP1866	No	Yes	No	451/817	0.55	..
PP3020	PA0590	299	8.6e-07	1	PP0399	No	No	No	203/337	0.6	..
PP2496	PA4491	299	3.8e-06	1	PP1492	No	No	No	505/889	0.56	..
PP2736	PA1304	298	6.5e-06	1	PP4583	No	No	No	398/704	0.56	..
PP2538	PA4991	298	1.4e-06	1	PP4931	No	No	No	412/731	0.56	..
PP4118	PA3941	298	2.8e-07	1	PP4761	No	No	No	288/515	0.55	..
PP2288	PA1245	297	8.6e-06	1	PP4243	No	No	No	643/1185	0.54	..
PP2710	PA4814	297	1.6e-06	1	PP2008	No	No	No	361/636	0.56	..
PP2690	PA0196	297	1.6e-06	1	PP0155	No	No	No	327/567	0.57	..
PP0355	PA2798	296	4.6e-07	1	PP2165	No	No	No	204/352	0.57	..
PP3517	PA2938	295	4e-06	1	PP4643	No	No	No	407/719	0.56	..
PP3141	PA0703	295	2.4e-06	1	PP2703	No	No	No	383/683	0.56	..
PP0537	PA2944	294	5.1e-06	1	PP3507	No	No	No	288/501	0.57	..
PP4768	PA2135	294	1.1e-06	1	PP2028	No	No	No	346/609	0.56	..
PP2003	PA4966	294	3.8e-06	1	PP4914	No	No	No	302/513	0.58	..
PP1404	PA3584	294	1.3e-06	1	PP1073	No	No	No	322/558	0.57	..
PP3959	PA2976	293	1.4e-05	1	PP1905	No	No	No	519/934	0.55	..
PP3521	PA2409	293	3.2e-06	1	PP3803	No	No	No	441/793	0.55	..
PP2389	PA4222	293	3.9e-06	1	PP2596	No	No	No	255/436	0.58	..
PP3910	PA2322	293	2e-06	1	PP3417	No	No	No	279/484	0.57	..
PP2578	PA3074	293	3.2e-07	1	PP2028	No	No	No	323/559	0.57	..
PP3157	PA3526	292	3e-06	1	PP1087	No	No	No	360/635	0.56	..
PP2929	PA1297	292	6.3e-06	1	PP3726	No	No	No	402/731	0.54	..
PP3712	PA4223	292	1.6e-08	1	PP2596	No	No	No	270/461	0.58	..
PP1102	PA3272	292	2.8e-06	1	PP1061	No	No	No	354/641	0.55	..
PP3257	PA1990	292	1.5e-06	1	PP0375	No	No	No	258/437	0.59	..
PP1055	PA3094	292	1.6e-06	1	PP2004	No	No	No	278/476	0.58	..
PP3005	PA4144	292	2.8e-06	1	PP4923	No	No	No	356/635	0.56	..
PP3129	PA1396	291	7.8e-06	1	PP1695	No	Yes	No	323/558	0.57	..
PP3445	PA4772	291	1e-08	2	PP4737	No	No	No	381/684	0.55	..
PP1045	PA2098	291	1.1e-08	1	PP3751	No	No	No	209/351	0.59	..
PP4310	PA2383	290	2.8e-06	1	PP4107	No	No	No	350/613	0.57	..
PP2044	PA4507	290	5.6e-09	1	PP0198	No	No	No	228/376	0.6	..
PP2727	PA3776	289	3.6e-06	1	PP1028	No	No	No	381/692	0.55	..
PP3488	PA0114	289	1e-06	1	PP0111	No	No	No	359/641	0.56	..
PP0116	PA5490	289	1.1e-06	1	PP0126	No	No	No	253/443	0.57	..
PP2909	PA2135	289	9.1e-06	1	PP2028	No	No	No	351/629	0.55	..
PP4558	PA3384	288	1.3e-08	1	PP0825	No	No	No	262/447	0.58	..
PP2897	PA2424	288	5.1e-06	1	PP4243	No	No	No	322/561	0.57	..
PP1561	PA3328	288	1.9e-08	1	PP3199	No	No	No	202/336	0.6	..
PP4439	PA3839	288	2.5e-05	1	PP3931	No	No	No	414/756	0.54	..
PP3981	PA3839	288	2.5e-05	1	PP3931	No	No	No	414/756	0.54	..
PP1800	PA2519	288	6.3e-06	1	PP3159	No	No	No	434/777	0.55	..
PP1448	PA1313	288	2.9e-06	1	PP4951	No	No	No	292/501	0.58	..
PP2613	PA3763	288	1.3e-05	1	PP1037	No	No	No	286/495	0.57	..
PP3501	PA3839	288	2.5e-05	1	PP3931	No	No	No	414/756	0.54	..
PP2494	PA2445	287	1.5e-05	1	PP0988	No	No	No	395/697	0.56	..
PP2735	PA0671	287	1.1e-06	1	PP3117	No	No	No	329/568	0.57	..
PP1584	PA1085	286	1.2e-07	1	PP4382	No	No	No	248/422	0.58	..
PP1093	PA5512	286	1.6e-06	1	PP1402	No	No	No	212/368	0.57	..
PP2888	PA2293	286	5.2e-07	1	PP0210	No	No	No	306/524	0.58	..
PP3207	PA1312	286	5.4e-06	1	PP1861	No	No	No	234/398	0.58	..
PP4424	PA2246	286	5.9e-09	1	PP4400	No	No	No	206/368	0.55	..
PP4752	PA2522	286	2.1e-05	1	PP0045	No	No	No	494/902	0.54	..
PP3449	PA2858	285	3.7e-08	1	PP2316	No	No	No	235/399	0.58	..
PP3472	PA3900	285	7.8e-06	1	PP0351	No	No	No	361/639	0.56	..
PP2656	PA3375	285	7.8e-06	1	PP4210	No	No	No	265/453	0.58	..
PP4114	PA2509	285	1.7e-05	1	PP3715	No	No	No	339/609	0.55	..
PP1096	PA3192	285	7.9e-07	1	PP1012	No	No	No	275/468	0.58	..
PP0590	PA0016	284	7.2e-06	1	PP0065	No	No	No	379/700	0.54	..
PP3647	PA0140	284	3.5e-08	1	PP2440	No	No	No	262/451	0.58	..
PP2243	PA3072	284	2.2e-08	1	PP2030	No	No	No	284/490	0.57	..
PP3550	PA5386	284	2.5e-08	1	PP0302	No	No	No	264/439	0.6	..
PP0134	PA2590	284	1.4e-05	1	PP3095	No	No	No	350/625	0.56	..
PP3183	PA2552	284	1.4e-05	1	PP2216	No	No	No	338/598	0.56	..
PP1113	PA0399	284	1.3e-05	1	PP4571	No	No	No	332/598	0.55	..
PP2898	PA2424	284	4.9e-08	1	PP4243	No	No	No	260/439	0.59	..
PP0174	PA2503	283	1.1e-05	1	PP3095	No	No	No	407/722	0.56	..
PP1159	PA4289	283	2.2e-05	1	PP1905	No	No	No	589/1073	0.54	..
PP3484	PA1437	283	6.5e-07	1	PP1438	No	No	No	193/335	0.57	..
PP2359	PA2018	283	2e-06	1	PP3456	No	No	No	273/464	0.58	..
PP3476	PA3100	282	8e-09	1	PP1049	No	No	No	218/363	0.6	..
PP2741	PA2539	282	4.5e-05	1	PP1202	No	No	No	334/591	0.56	..
PP1739	PA1313	282	4e-08	1	PP4951	No	No	No	220/360	0.61	..
PP0353	PA4231	281	1e-05	1	PP4243	No	No	No	283/493	0.57	..
PP3905	PA2976	281	3.7e-06	1	PP1905	No	No	No	305/517	0.58	..
PP3341	PA1440	280	1.3e-08	1	PP4517	No	No	No	236/398	0.59	..
PP3169	PA5133	280	2.8e-05	1	PP5057	No	No	No	456/842	0.54	..
PP1474	PA4161	279	1.8e-05	1	PP2594	No	No	No	371/663	0.55	..
PP2023	PA0334	279	6e-06	1	PP3740	No	No	No	295/522	0.56	..
PP2483	PA2091	279	6.2e-06	1	PP2092	No	No	No	319/558	0.57	..
PP1844	PA1214	278	1.5e-05	1	PP4211	No	No	No	272/478	0.56	..
PP3834	PA2390	278	6.9e-05	1	PP4210	No	No	No	133/223	0.59	..
PP3138	PA2302	278	4.5e-05	1	PP4219	No	No	No	450/814	0.55	..
PP3198	PA4711	278	1.8e-08	1	PP4690	No	No	No	162/265	0.61	..
PP2541	PA0744	278	3.9e-06	1	PP1412	No	No	No	314/544	0.57	..
PP3757	PA5200	278	3.3e-08	1	PP0246	No	No	No	210/364	0.57	..
PP2273	PA2542	278	0.00013	1	PP2893	No	No	No	1028/1936	0.53	..
PP1566	PA1628	278	1.4e-05	1	PP3282	No	No	No	298/532	0.56	..
PP4246	PA1264	277	1.5e-05	1	PP1863	No	No	No	431/788	0.54	..
PP4429	PA4132	277	6.4e-05	1	PP3544	No	No	No	413/767	0.53	..
PP3015	PA3924	277	7.5e-08	1	PP0763	No	No	No	93/134	0.69	..
PP3477	PA2520	277	8.9e-08	1	PP2410	No	No	No	233/392	0.59	..
PP0705	PA5384	277	7.9e-06	1	PP4218	No	No	No	349/611	0.57	..
PP1160	PA2162	277	4.4e-05	1	PP4053	No	Yes	No	393/710	0.55	..
PP2964	PA3063	277	0.00023	1	PP2024	No	No	No	1379/2591	0.53	..
PP2778	PA0208	276	6.6e-05	1	PP4276	No	No	No	472/852	0.55	..
PP5237	PA5290	276	7.9e-08	1	PP5239	No	No	No	72/90	0.8	..
PP1269	PA5132	275	5.4e-08	1	PP0117	No	No	No	167/268	0.62	..
PP2773	PA2357	275	1.9e-08	1	PP2764	No	No	No	87/121	0.71	..
PP4079	PA0142	275	2.7e-05	1	PP2584	No	No	No	455/820	0.55	..
PP1165	PA2336	274	3.7e-05	1	PP4737	No	No	No	434/773	0.56	..
PP3681	PA5443	274	0.00013	1	PP5352	No	No	No	206/353	0.58	..
PP3441	PA0267	274	5.9e-05	1	PP0215	No	No	No	568/1046	0.54	..
PP1548	PA3177	273	7.7e-08	1	PP0563	No	No	No	247/426	0.57	..
PP1456	PA1418	273	1e-07	1	PP4524	No	No	No	193/321	0.6	..
PP1543	PA2728	273	9.4e-06	1	PP0806	No	No	No	299/522	0.57	..
PP2629	PA0520	272	2.1e-05	1	PP3201	No	No	No	342/616	0.55	..
PP0201	PA2943	272	2e-06	1	PP3080	No	No	No	206/349	0.59	..
PP3042	PA1417	272	0.00019	1	PP1394	No	No	No	546/979	0.55	..
PP1168	PA3780	271	1.1e-06	1	PP4276	No	No	No	285/494	0.57	..
PP5135	PA3763	271	9.6e-05	1	PP1037	No	No	No	499/902	0.55	..
PP3230	PA3554	271	3.3e-05	1	PP0067	No	No	No	287/503	0.57	..
PP0663	PA5308	271	2.6e-08	1	PP5271	No	No	No	193/329	0.58	..
PP4465	PA0291	271	0.00011	1	PP2058	No	No	No	131/203	0.64	..
PP2824	PA0167	271	1.2e-05	1	PP0594	No	No	No	269/473	0.56	..
PP2358	PA4895	271	7.1e-06	1	PP3085	No	No	No	277/485	0.57	..
PP4350	PA2062	271	8.2e-05	1	PP2435	No	No	No	145/245	0.59	..
PP2968	PA4899	271	8.8e-05	1	PP3357	No	No	No	427/764	0.55	..
PP3857	PA2118	270	0.00022	1	PP0706	No	No	No	570/1041	0.54	..
PP1837	PA2170	270	6.8e-08	1	PP3971	No	No	No	112/168	0.66	..
PP3238	PA3354	270	5.3e-06	1	PP4276	No	No	No	260/441	0.58	..
PP2982	PA2728	270	9.5e-05	1	PP0806	No	No	No	456/807	0.56	..
PP3292	PA3947	270	2.3e-05	1	PP2258	No	No	No	264/447	0.59	..
PP3204	PA0432	269	1.9e-05	1	PP2608	No	No	No	315/553	0.56	..
PP4544	PA1315	269	4.5e-05	1	PP2206	No	No	No	171/280	0.61	..
PP0818	PA5449	268	0.00014	1	PP1780	No	No	No	424/755	0.56	..
PP2271	PA1874	268	0.00018	1	PP0806	No	No	No	468/848	0.55	..
PP3759	PA4894	268	5.6e-06	1	PP4783	No	No	No	244/416	0.58	..
PP1571	PA4161	268	3.1e-06	1	PP2594	No	No	No	228/392	0.58	..
PP2708	PA2642	267	5.4e-05	1	PP4124	No	No	No	299/528	0.56	..
PP1660	PA0788	266	1.9e-05	1	PP1058	No	No	No	188/319	0.58	..
PP4629	PA2177	266	2.6e-07	1	PP3835	No	No	No	250/412	0.6	..
PP2928	PA4302	266	0.00016	1	PP3483	No	No	No	368/673	0.54	..
PP4230	PA2642	265	3.2e-05	1	PP4124	No	No	No	337/584	0.57	..
PP3973	PA2171	265	5.1e-08	1	PP2722	No	No	No	109/161	0.67	..
PP3339	PA1908	265	2.3e-07	1	PP2885	No	No	No	219/380	0.57	..
PP2363	PA4689	265	0.00015	1	PP0599	No	No	No	411/752	0.54	..
PP0895	PA0413	265	4.5e-05	1	PP4988	No	No	No	295/518	0.56	..
PP2355	PA1456	264	7.2e-08	1	PP4340	No	No	No	174/285	0.61	..
PP4207	PA1275	264	4.6e-06	1	PP1675	No	No	No	272/483	0.56	..
PP2449	PA2942	264	4.6e-05	1	PP3506	No	No	No	270/468	0.57	..
PP2646	PA2448	263	3.3e-07	1	PP5252	No	No	No	227/379	0.59	..
PP2728	PA5552	263	1.1e-05	1	PP5411	No	No	No	267/472	0.56	..
PP2779	PA2949	262	0.00016	1	PP3645	No	No	No	340/599	0.56	..
PP2941	PA1608	262	0.00012	1	PP0317	No	No	No	382/701	0.54	..
PP2597	PA1232	262	8.3e-05	1	PP2028	No	No	No	330/587	0.56	..
PP1054	PA4112	262	4.5e-07	1	PP1650	No	No	No	236/398	0.59	..
PP1425	PA4328	262	1e-06	1	PP3237	No	No	No	260/440	0.59	..
PP2357	PA3063	262	6.1e-05	1	PP2024	No	No	No	258/449	0.57	..
PP2183	PA1235	261	7e-06	1	PP2365	No	Yes	No	197/321	0.61	..
PP4096	PA3420	261	0.00013	1	PP0767	No	No	No	291/507	0.57	..
PP3336	PA5354	261	3.2e-07	1	PP3746	No	No	No	249/429	0.58	..
PP0487	PA4218	261	0.00012	1	PP1355	No	No	No	333/582	0.57	..
PP3860	PA2479	261	0.00011	1	PP4225	No	No	No	397/708	0.56	..
PP2006	PA5017	261	0.00061	1	PP0337	No	No	No	431/792	0.54	..
PP2007	PA5022	261	0.00037	1	PP5067	No	No	No	655/1218	0.53	..
PP3145	PA1992	261	0.00015	1	PP2683	No	No	No	299/528	0.56	..
PP3881	PA5032	260	0.00048	1	PP4508	No	No	No	442/805	0.54	..
PP3890	PA2239	260	3.6e-07	1	PP4796	No	No	No	250/430	0.58	..
PP2807	PA2172	260	0.00016	1	PP3750	No	No	No	498/910	0.54	..
PP4155	PA2065	260	0.00036	1	PP5380	No	No	No	682/1264	0.53	..
PP4598	PA3777	259	0.00021	1	PP1027	No	No	No	441/800	0.55	..
PP4567	PA5241	259	3.2e-05	1	PP5216	No	No	No	291/512	0.56	..
PP3985	PA3704	259	0.00059	1	PP1492	No	No	No	635/1166	0.54	..
PP1472	PA3102	259	8.6e-05	1	PP1048	No	No	No	275/491	0.56	..
PP2625	PA3024	259	0.00012	1	PP4772	No	No	No	355/623	0.56	..
PP2879	PA2873	259	7.7e-05	1	PP4328	No	No	No	349/623	0.56	..
PP3114	PA3704	259	0.00059	1	PP1492	No	No	No	635/1166	0.54	..
PP3422	PA4585	259	5.6e-05	1	PP1524	No	No	No	287/506	0.56	..
PP3772	PA0687	258	0.0002	1	PP1048	No	No	No	360/651	0.55	..
PP2282	PA0757	258	0.00027	1	PP1421	No	No	No	350/621	0.56	..
PP0676	PA3220	258	1.6e-05	1	PP4511	No	No	No	262/450	0.58	..
PP5396	PA1196	258	0.00056	1	PP4371	No	No	No	474/876	0.54	..
PP4443	PA1196	258	0.00056	1	PP4371	No	No	No	474/876	0.54	..
PP2776	PA3462	258	0.0003	1	PP4824	No	No	No	190/318	0.59	..
PP2421	PA1313	258	5.3e-05	1	PP4951	No	No	No	296/516	0.57	..
PP3326	PA5309	257	0.00015	1	PP5273	No	No	No	291/514	0.56	..
PP2414	PA0323	257	1.6e-05	1	PP5181	No	No	No	241/418	0.57	..
PP3974	PA4899	257	0.00032	1	PP3357	No	No	No	355/625	0.56	..
PP2575	PA5183	257	1.4e-07	1	PP3930	No	No	No	185/310	0.59	..
PP3853	PA3303	256	5.8e-07	1	PP2367	No	No	No	210/362	0.58	..
PP2287	PA2335	256	0.0032	1	PP4838	No	No	No	806/1514	0.53	..
PP3568	PA3098	256	3.5e-07	1	PP1108	No	No	No	198/338	0.58	..
PP1554	PA4269	256	8.3e-07	1	PP0448	No	No	No	226/392	0.57	..
PP5163	PA0706	256	3.5e-05	1	PP4158	No	No	No	128/200	0.64	..
PP2666	PA4179	255	8e-05	1	PP3764	No	No	No	209/351	0.59	..
PP2955	PA3738	255	0.00025	1	PP1468	No	No	No	341/627	0.54	..
PP0385	PA5376	255	7.2e-05	1	PP0294	No	No	No	243/420	0.57	..
PP2173	PA3584	255	0.00031	1	PP1073	No	No	No	377/669	0.56	..
PP3128	PA0027	255	0.00025	1	PP4838	No	No	No	301/525	0.57	..
PP2712	PA3763	255	0.00018	1	PP1037	No	No	No	281/504	0.55	..
PP2618	PA2493	255	0.00024	1	PP3425	No	No	No	401/711	0.56	..
PP0575	PA1417	255	2.1e-05	1	PP1394	No	No	No	195/336	0.58	..
PP3281	PA3912	254	5.8e-07	1	PP4124	No	No	No	256/454	0.56	..
PP1643	PA1115	254	9.3e-07	1	PP2852	No	No	No	238/403	0.59	..
PP3066	PA0629	254	3.8e-05	1	PP4627	No	No	No	154/259	0.59	..
PP2798	PA3821	254	0.00041	1	PP0835	No	No	No	402/733	0.54	..
PP5254	PA3436	254	2.4e-07	1	PP4631	No	No	No	152/253	0.6	..
PP2491	PA0168	254	6.9e-05	1	PP0593	No	No	No	258/457	0.56	..
PP2959	PA2725	254	6.8e-05	1	PP3095	No	No	No	290/520	0.55	..
PP2756	PA3618	254	1.5e-07	1	PP1628	No	No	No	202/346	0.58	..
PP3824	PA3376	254	5.3e-07	1	PP3220	No	No	No	180/310	0.58	..
PP3243	PA4889	254	4.7e-05	1	PP4158	No	No	No	260/457	0.56	..
PP3474	PA4751	254	8.8e-07	1	PP4718	No	No	No	240/412	0.58	..
PP1884	PA0687	253	0.0016	1	PP1048	No	No	No	273/491	0.55	..
PP4588	PA4963	253	7.5e-05	1	PP4911	No	No	No	303/533	0.56	..
PP1574	PA4476	253	3.6e-05	1	PP0938	No	No	No	265/476	0.55	..
PP2954	PA0595	253	1.1e-06	1	PP0338	No	No	No	145/227	0.63	..
PP4740	PA1115	253	0.002	1	PP2852	No	No	No	481/872	0.55	..
PP2432	PA4592	253	0.00019	1	PP4243	No	Yes	No	301/539	0.55	..
PP1715	PA1907	253	9.3e-07	1	PP4999	No	No	No	163/272	0.59	..
PP3888	PA2437	253	7.4e-07	1	PP5227	No	No	No	163/269	0.6	..
PP2971	PA0151	253	0.00042	1	PP4606	No	No	No	425/752	0.56	..
PP2730	PA3327	253	0.00012	1	PP4220	No	No	No	249/431	0.57	..
PP2609	PA2948	252	0.0002	1	PP3410	No	No	No	252/435	0.57	..
PP4858	PA3617	252	5e-05	1	PP1629	No	No	No	258/450	0.57	..
PP2598	PA2896	252	3.6e-07	1	PP5187	No	No	No	166/267	0.62	..
PP3081	PA0273	252	3.6e-05	1	PP3751	No	No	No	272/486	0.55	..
PP3609	PA2529	252	9.2e-05	1	PP4949	No	No	No	264/459	0.57	..
PP3049	PA4541	251	0.00032	1	PP0806	No	No	No	207/352	0.58	..
PP2884	PA2312	251	4.3e-05	1	PP5206	No	No	No	297/526	0.56	..
PP0384	PA4508	251	3.3e-06	1	PP1307	No	No	No	205/358	0.57	..
PP2626	PA1640	251	0.00093	1	PP2305	No	No	No	577/1078	0.53	..
PP3286	PA5412	251	0.00063	1	PP4243	No	No	No	425/769	0.55	..
PP3233	PA5012	251	0.00027	1	PP0341	No	No	No	291/508	0.57	..
PP3320	PA5066	251	2.6e-07	1	PP5014	No	No	No	83/118	0.7	..
PP1532	PA5072	250	0.00091	1	PP4658	No	No	No	560/1016	0.55	..
PP3762	PA4726	250	1.2e-06	1	PP4696	No	No	No	200/347	0.57	..
PP2652	PA5223	250	0.00039	1	PP5199	No	No	No	326/584	0.55	..
PP3337	PA3220	250	7.5e-07	1	PP4511	No	No	No	186/308	0.6	..
PP3475	PA1276	250	9.5e-05	1	PP1676	No	No	No	276/476	0.57	..
PP1888	PA1441	249	0.00085	1	PP4361	No	No	No	285/501	0.56	..
PP0262	PA1498	249	3.2e-05	1	PP4301	No	No	No	237/408	0.58	..
PP3891	PA1338	248	1.6e-06	1	PP4659	No	No	No	146/235	0.62	..
PP3440	PA0413	248	0.0014	1	PP4988	No	No	No	508/916	0.55	..
PP0642	PA5030	248	0.00027	1	PP5072	No	No	No	332/595	0.55	..
PP4045	PA4197	248	1.7e-06	1	PP3552	No	No	No	162/271	0.59	..
PP3007	PA3895	248	0.00012	1	PP1262	No	No	No	292/523	0.55	..
PP4833	PA4719	247	4.8e-06	1	PP4653	No	No	No	251/449	0.55	..
PP0195	PA4844	247	9.5e-05	1	PP0562	No	No	No	261/443	0.58	..
PP3479	PA4816	247	0.00016	1	PP3095	No	No	No	271/470	0.57	..
PP3133	PA3921	247	0.0021	1	PP0767	No	No	No	329/584	0.56	..
PP4609	PA3271	246	2.3e-06	1	PP1695	No	No	No	184/315	0.58	..
PP3485	PA1399	246	0.0003	1	PP2436	No	No	No	348/612	0.56	..
PP1553	PA1653	246	3.7e-07	1	PP3550	No	No	No	180/300	0.6	..
PP0173	PA0502	246	0.00022	1	PP0364	No	No	No	246/420	0.58	..
PP0962	PA3132	246	1.3e-06	1	PP1979	No	No	No	112/165	0.67	..
PP3172	PA1458	245	0.0024	1	PP4338	No	No	No	407/733	0.55	..
PP0991	PA4094	245	0.00057	1	PP1711	No	No	No	319/553	0.57	..
PP3920	PA3290	245	0.0015	1	PP4772	No	No	No	559/1024	0.54	..
PP0607	PA3457	245	7.4e-05	1	PP2024	No	No	No	159/256	0.62	..
PP3016	PA4128	245	0.00057	1	PP0693	No	No	No	325/577	0.56	..
PP1846	PA1458	245	0.0024	1	PP4338	No	No	No	407/733	0.55	..
PP2293	PA1549	245	0.003	1	PP4261	No	No	No	697/1303	0.53	..
PP2264	PA2783	245	1.8e-07	2	PP3450	No	No	No	549/1000	0.54	..
PP1146	PA1511	244	0.00074	1	PP2614	No	No	No	398/719	0.55	..
PP2999	PA1361	244	2.3e-06	1	PP5262	No	No	No	234/413	0.56	..
PP0183	PA1521	244	0.00053	1	PP4281	No	No	No	370/656	0.56	..
PP1925	PA0545	244	0.0014	1	PP3062	No	No	No	532/977	0.54	..
PP2497	PA5219	244	2.1e-06	1	PP5072	No	No	No	176/299	0.58	..
PP4245	PA5386	244	0.00036	1	PP0302	No	No	No	278/488	0.56	..
PP1147	PA2148	244	4.5e-07	1	PP3541	No	No	No	154/260	0.59	..
PP2270	PA1681	244	0.0024	1	PP1830	No	No	No	398/731	0.54	..
PP0081	PA2449	244	2.3e-06	1	PP0997	No	No	No	182/302	0.6	..
PP2786	PA2976	244	0.0012	1	PP1905	No	No	No	310/539	0.57	..
PP5392	PA3312	243	0.0013	1	PP1143	No	No	No	445/795	0.55	..
PP2404	PA0874	243	8.9e-07	1	PP4488	No	No	No	161/270	0.59	..
PP1717	PA4223	243	2.7e-06	1	PP2596	No	No	No	225/381	0.59	..
PP2495	PA1137	243	0.0012	1	PP5210	No	No	No	331/591	0.56	..
PP4396	PA1313	243	0.00011	1	PP4951	No	No	No	253/432	0.58	..
PP2981	PA1296	243	0.0011	1	PP4589	No	No	No	313/549	0.57	..
PP0769	PA4814	242	0.00087	1	PP2008	No	No	No	334/610	0.54	..
PP3643	PA4131	242	0.0002	1	PP3543	No	No	No	278/493	0.56	..
PP4226	PA5182	242	6.4e-07	1	PP0255	No	No	No	138/217	0.63	..
PP3786	PA3491	242	0.0026	1	PP2024	No	No	No	300/532	0.56	..
PP2661	PA0451	242	0.00049	1	PP0200	No	No	No	332/595	0.55	..
PP3006	PA5277	242	0.00034	1	PP5227	No	No	No	250/439	0.56	..
PP2532	PA5198	242	0.00015	1	PP4799	No	No	No	218/373	0.58	..
PP0163	PA5105	242	0.00048	1	PP5035	No	No	No	364/655	0.55	..
PP3795	PA1527	241	0.00011	1	PP4276	No	No	No	255/446	0.57	..
PP1583	PA3973	241	9.3e-05	1	PP4243	No	No	No	257/452	0.56	..
PP3389	PA3314	241	0.0016	1	PP0825	No	No	No	301/539	0.55	..
PP4741	PA2350	241	0.0029	1	PP0220	No	No	No	405/746	0.54	..
PP3519	PA1782	240	3.6e-06	1	PP2091	No	No	No	164/261	0.62	..
PP3367	PA4966	240	0.0007	1	PP4914	No	No	No	264/471	0.56	..
PP2172	PA1297	240	7.6e-05	1	PP3726	No	No	No	98/150	0.65	..
PP3312	PA2314	240	3.3e-06	1	PP2392	No	No	No	192/324	0.59	..
PP1569	PA4868	239	0.00026	1	PP2845	No	No	No	189/310	0.6	..
PP3045	PA0477	239	0.0023	1	PP3669	No	No	No	421/784	0.53	..
PP4314	PA2354	239	0.00026	1	PP2771	No	No	No	251/433	0.57	..
PP2821	PA2891	239	4.3e-06	1	PP4067	No	No	No	203/346	0.58	..
PP2405	PA3089	238	0.00043	1	PP2011	No	No	No	258/461	0.55	..
PP4835	PA3633	238	2.5e-06	1	PP1614	No	No	No	208/347	0.59	..
PP0894	PA5154	238	2.5e-06	1	PP0281	No	No	No	144/221	0.65	..
PP3058	PA0030	238	0.00016	1	PP0076	No	No	No	212/365	0.58	..
PP2896	PA3920	238	5e-06	1	PP0586	No	No	No	212/353	0.6	..
PP3871	PA4868	237	0.00029	1	PP2845	No	No	No	235/408	0.57	..
PP4101	PA3089	237	0.00013	1	PP2011	No	No	No	195/333	0.58	..
PP2227	PA4323	237	0.00036	1	PP4261	No	No	No	193/336	0.57	..
PP1094	PA3311	237	0.0011	1	PP1144	No	No	No	317/549	0.57	..
PP1810	PA3191	237	0.0016	1	PP1013	No	No	No	251/447	0.56	..
PP1792	PA2431	237	0.011	1	PP1150	No	No	No	423/756	0.55	..
PP0031	PA2899	236	0.00048	1	PP2675	No	No	No	218/373	0.58	..
PP3273	PA2712	236	3.9e-06	1	PP4568	No	No	No	120/190	0.63	..
PP1781	PA0448	236	0.0028	1	PP0157	No	No	No	230/388	0.59	..
PP3820	PA1458	236	0.0062	1	PP4338	No	No	No	406/733	0.55	..
PP1881	PA3296	236	0.0085	1	PP1402	No	No	No	424/763	0.55	..
PP1855	PA3328	235	5.4e-06	1	PP3199	No	No	No	233/404	0.57	..
PP2182	PA2399	235	0.00084	1	PP4219	No	No	No	233/398	0.58	..
PP1194	PA2402	235	0.0041	1	PP4220	No	No	No	351/620	0.56	..
PP2814	PA2062	235	0.0025	1	PP2435	No	No	No	443/824	0.53	..
PP3896	PA4787	235	0.0012	1	PP2004	No	No	No	317/554	0.57	..
PP3385	PA4179	235	0.0025	1	PP3764	No	No	No	427/773	0.55	..
PP3914	PA4829	235	5.9e-06	1	PP5366	No	No	No	169/281	0.6	..
PP3101	PA2502	235	0.0023	1	PP5133	No	No	No	415/743	0.55	..
PP1538	PA4218	235	0.0019	1	PP1355	No	No	No	179/299	0.59	..
PP2619	PA2286	234	0.0011	1	PP3750	No	No	No	310/558	0.55	..
PP0419	PA0608	234	4.6e-06	1	PP0416	No	No	No	66/84	0.78	..
PP2360	PA3509	234	0.00048	1	PP3645	No	No	No	288/516	0.55	..
PP3314	PA1412	234	0.0003	1	PP4526	No	No	No	246/447	0.55	..
PP1562	PA3448	234	4.7e-06	1	PP0231	No	No	No	204/348	0.58	..
PP3329	PA0987	233	0.0047	1	PP0264	No	No	No	333/595	0.55	..
PP0683	PA4176	233	2.4e-06	1	PP3079	No	No	No	141/226	0.62	..
PP2200	PA3320	233	0.00021	1	PP4819	No	No	No	253/451	0.56	..
PP3473	PA3170	233	7.1e-05	1	PP2584	No	No	No	213/364	0.58	..
PP3854	PA4730	233	0.00073	1	PP4700	No	No	No	221/385	0.57	..
PP2396	PA4495	233	0.00078	1	PP0886	No	No	No	207/349	0.59	..
PP2075	PA0333	233	0.0051	1	PP1897	No	No	No	291/517	0.56	..
PP0028	PA0874	232	2.8e-06	1	PP4488	No	No	No	112/176	0.63	..
PP3046	PA2014	232	8.5e-06	1	PP4065	No	No	No	208/353	0.58	..
PP3879	PA4044	232	0.0077	1	PP0527	No	No	No	406/728	0.55	..
PP3875	PA1486	232	0.0011	1	PP3844	No	No	No	240/419	0.57	..
PP1004	PA3781	231	0.00011	1	PP1167	No	No	No	231/393	0.58	..
PP2697	PA0357	231	0.0011	1	PP5125	No	No	No	193/321	0.6	..
PP3837	PA2478	231	0.00013	1	PP4235	No	No	No	229/393	0.58	..
PP4456	PA0301	231	0.0079	1	PP5180	No	No	No	237/411	0.57	..
PP0254	PA2682	230	0.0004	1	PP4546	No	No	No	204/358	0.56	..
PP0611	PA3028	230	9.4e-06	1	PP2123	No	No	No	182/304	0.59	..
PP3793	PA0103	230	0.006	1	PP0101	No	No	No	242/430	0.56	..
PP2059	PA2386	230	9.7e-06	1	PP3796	No	No	No	160/259	0.61	..
PP3374	PA3408	230	1.2e-05	1	PP5242	No	No	No	114/178	0.64	..
PP4073	PA1046	230	0.0027	1	PP1126	No	No	No	278/493	0.56	..
PP2792	PA1993	230	9.3e-06	1	PP4492	No	No	No	164/283	0.57	..
PP3878	PA5384	229	0.0053	1	PP4218	No	No	No	213/368	0.57	..
PP0781	PA1914	228	1.2e-05	1	PP4363	No	No	No	188/315	0.59	..
PP2777	PA3811	228	0.00072	1	PP0845	No	No	No	266/456	0.58	..
PP0610	PA5037	228	0.0009	1	PP5077	No	No	No	276/480	0.57	..
PP2415	PA0860	228	0.0032	1	PP1760	No	No	No	368/666	0.55	..
PP3982	PA0191	228	0.022	1	PP3716	No	No	No	344/621	0.55	..
PP0609	PA2468	228	0.001	1	PP0162	No	No	No	204/342	0.59	..
PP2464	PA5153	228	8.1e-06	1	PP0282	No	No	No	146/237	0.61	..
PP0821	PA2236	228	0.00017	1	PP0672	No	No	No	198/327	0.6	..
PP4432	PA2197	227	0.0085	1	PP2476	No	No	No	313/547	0.57	..
PP2806	PA0436	227	0.0013	1	PP4295	No	No	No	103/166	0.62	..
PP3774	PA1866	227	0.0044	1	PP2839	No	No	No	211/364	0.57	..
PP3089	PA4101	227	0.0013	1	PP2403	No	No	No	183/313	0.58	..
PP2226	PA1848	227	1.3e-05	1	PP1202	No	No	No	123/187	0.65	..
PP2281	PA2424	227	0.0071	1	PP4243	No	No	No	237/400	0.59	..
PP3778	PA2342	227	0.0056	1	PP0806	No	No	No	345/628	0.54	..
PP3861	PA4775	226	1.1e-05	1	PP4505	No	No	No	148/239	0.61	..
PP1990	PA0458	226	0.014	1	PP4951	No	No	No	248/437	0.56	..
PP3522	PA3499	226	6.5e-05	1	PP4695	No	No	No	152/260	0.58	..
PP2218	PA0458	226	0.014	1	PP4951	No	No	No	248/437	0.56	..
PP2522	PA0458	226	0.014	1	PP4951	No	No	No	248/437	0.56	..
PP1692	PA1737	226	0.00059	1	PP2136	No	No	No	130/209	0.62	..
PP4318	PA0458	226	0.014	1	PP4951	No	No	No	248/437	0.56	..
PP5238	PA2367	226	0.00044	1	PP4886	No	No	No	222/398	0.55	..
PP3789	PA2162	226	0.015	1	PP4053	No	No	No	340/617	0.55	..
PP1865	PA0458	226	0.014	1	PP4951	No	No	No	248/437	0.56	..
PP2114	PA0458	226	0.014	1	PP4951	No	No	No	248/437	0.56	..
PP2883	PA4006	225	9.2e-06	1	PP4810	No	No	No	169/279	0.6	..
PP4105	PA4978	225	0.002	1	PP3724	No	No	No	239/414	0.57	..
PP3041	PA0067	225	0.0042	1	PP0096	No	No	No	233/405	0.57	..
PP4319	PA5271	225	6.6e-06	1	PP0181	No	No	No	107/171	0.62	..
PP4196	PA5060	225	0.0006	1	PP5007	No	No	No	147/237	0.62	..
PP3777	PA0223	224	0.0065	1	PP2036	No	No	No	216/376	0.57	..
PP2450	PA3820	224	0.00055	1	PP0836	No	No	No	246/427	0.57	..
PP3052	PA3565	224	1.5e-05	1	PP2431	No	No	No	174/283	0.61	..
PP3294	PA0035	224	0.0067	1	PP0082	No	No	No	260/460	0.56	..
PP1508	PA3684	224	4.9e-06	1	PP2046	No	No	No	166/277	0.59	..
PP3153	PA1412	224	0.00096	1	PP4526	No	No	No	238/412	0.57	..
PP4406	PA0794	224	0.0031	1	PP2336	No	No	No	294/535	0.54	..
PP3887	PA3061	224	0.0052	1	PP1673	No	No	No	224/394	0.56	..
PP0274	PA4222	223	0.0034	1	PP2596	No	No	No	195/338	0.57	..
PP0568	PA0167	223	0.00083	1	PP0594	No	No	No	139/224	0.62	..
PP3964	PA0031	223	0.024	1	PP0077	No	No	No	799/1496	0.53	..
PP2284	PA2652	223	0.043	1	PP3557	No	No	No	251/431	0.58	..
PP2459	PA4513	223	0.00029	1	PP0860	No	Yes	No	191/332	0.57	..
PP4459	PA2519	223	0.012	1	PP3159	No	No	No	343/611	0.56	..
PP0898	PA4332	222	2.4e-05	1	PP4405	No	No	No	78/111	0.7	..
PP3562	PA3327	222	0.0081	1	PP4220	No	No	No	336/615	0.54	..
PP4081	PA0413	222	0.016	1	PP4988	No	No	No	398/738	0.53	..
PP4748	PA2322	222	0.0095	1	PP3417	No	No	No	330/600	0.55	..
PP3979	PA2424	222	3.1e-05	1	PP4243	No	No	No	168/279	0.6	..
PP3884	PA0138	222	1.9e-05	1	PP0337	No	No	No	182/306	0.59	..
PP4001	PA1825	222	1.3e-05	1	PP5133	No	No	No	182/306	0.59	..
PP2611	PA2627	222	0.007	1	PP4015	No	No	No	280/495	0.56	..
PP4647	PA1136	222	0.0069	1	PP2567	No	No	No	332/606	0.54	..
PP3499	PA2424	222	3.1e-05	1	PP4243	No	No	No	168/279	0.6	..
PP1879	PA2458	222	0.023	1	PP4085	No	No	No	224/378	0.59	..
PP4437	PA2424	222	3.1e-05	1	PP4243	No	No	No	168/279	0.6	..
PP3966	PA2424	222	3.1e-05	1	PP4243	No	No	No	168/279	0.6	..
PP1414	PA3589	221	0.031	1	PP3280	No	Yes	No	449/823	0.54	..
PP2622	PA4120	221	0.00055	1	PP0762	No	No	No	225/391	0.57	..
PP2235	PA4282	221	3.2e-05	1	PP2024	No	No	No	185/313	0.59	..
PP0307	PA1263	221	0.001	1	PP0988	No	No	No	209/355	0.58	..
PP2573	PA4538	221	7.5e-05	1	PP0626	No	No	No	221/379	0.58	..
PP2490	PA4143	221	0.013	1	PP4927	No	No	No	283/496	0.57	..
PP4166	PA4905	221	2.1e-05	1	PP3737	No	No	No	225/379	0.59	..
PP3781	PA4625	220	0.038	1	PP0806	No	No	No	546/1016	0.53	..
PP3246	PA4013	220	0.0016	1	PP4815	No	No	No	130/203	0.64	..
PP3769	PA3562	220	3.4e-05	1	PP0793	No	No	No	176/296	0.59	..
PP1169	PA5376	220	0.016	1	PP0294	No	No	No	196/344	0.56	..
PP1795	PA5445	220	0.015	1	PP0154	No	No	No	464/857	0.54	..
PP3749	PA5466	220	0.0031	1	PP3561	No	No	No	282/494	0.57	..
PP3107	PA4488	220	0.0042	1	PP2184	No	No	No	224/395	0.56	..
PP0730	PA2615	220	0.03	1	PP4004	No	No	No	392/701	0.55	..
PP0993	PA1523	220	3.3e-05	1	PP4279	No	No	No	168/281	0.59	..
PP1030	PA2424	220	0.0067	1	PP4243	No	No	No	254/449	0.56	..
PP1397	PA1272	220	1.5e-05	1	PP1672	No	No	No	120/191	0.62	..
PP1632	PA0081	219	3.3e-05	1	PP2801	No	No	No	185/318	0.58	..
PP2285	PA2728	219	0.0068	1	PP0806	No	No	No	311/561	0.55	..
PP1250	PA1458	219	0.037	1	PP4338	No	No	No	435/795	0.54	..
PP1849	PA1703	219	3.6e-05	1	PP4344	No	No	No	193/318	0.6	..
PP3460	PA2642	219	3.8e-05	1	PP4124	No	No	No	175/291	0.6	..
PP1624	PA1458	219	0.037	1	PP4338	No	No	No	435/795	0.54	..
PP2995	PA0660	219	0.0043	1	PP0430	No	No	No	255/441	0.57	..
PP3870	PA4905	218	2.9e-05	1	PP3737	No	No	No	128/199	0.64	..
PP3617	PA2627	218	0.0098	1	PP4015	No	No	No	242/421	0.57	..
PP2197	PA1566	218	3.5e-05	1	PP4547	No	No	No	172/301	0.57	..
PP1252	PA1458	218	0.041	1	PP4338	No	No	No	278/487	0.57	..
PP2738	PA1896	218	0.0015	1	PP4474	No	No	No	196/334	0.58	..
PP3916	PA1874	218	3.3e-06	2	PP0806	No	No	No	202/349	0.57	..
PP3917	PA0702	217	3.1e-05	1	PP2024	No	No	No	193/329	0.58	..
PP0990	PA2006	217	0.00039	1	PP3740	No	No	No	163/275	0.59	..
PP2276	PA1173	217	0.0028	1	PP2337	No	No	No	255/452	0.56	..
PP1161	PA0069	217	0.01	1	PP0099	No	No	No	327/590	0.55	..
PP3296	PA0781	217	0.0045	1	PP1446	No	No	No	161/272	0.59	..
PP3235	PA3910	217	0.00065	1	PP4772	No	No	No	125/200	0.62	..
PP2108	PA1721	217	0.00038	1	PP4276	No	No	No	153/257	0.59	..
PP1556	PA0552	217	3.6e-05	1	PP4963	No	No	No	185/317	0.58	..
PP3213	PA1954	216	0.024	1	PP2856	No	No	No	228/390	0.58	..
PP4962	PA0455	216	4.3e-05	1	PP4952	No	No	No	144/231	0.62	..
PP3833	PA2583	216	5.2e-05	1	PP2100	No	No	No	176/297	0.59	..
PP2775	PA5327	216	0.032	1	PP0778	No	Yes	No	208/360	0.57	..
PP3911	PA3697	216	0.00038	1	PP1499	No	No	No	202/354	0.57	..
PP3775	PA2424	216	0.044	1	PP4243	No	Yes	No	496/912	0.54	..
PP0666	PA3374	216	4e-05	1	PP1037	No	No	No	164/270	0.6	..
PP1547	PA3460	215	5.2e-05	1	PP1749	No	No	No	159/259	0.61	..
PP3627	PA4808	215	4.9e-05	1	PP0493	No	No	No	121/193	0.62	..
PP2633	PA4822	215	5.1e-05	1	PP0145	No	No	No	133/220	0.6	..
PP1559	PA3973	215	2.8e-05	1	PP4243	No	No	No	177/301	0.58	..
PP1536	PA4148	215	0.00039	1	PP1817	No	No	No	191/337	0.56	..
PP0801	PA1265	215	3.9e-05	1	PP4767	No	No	No	169/286	0.59	..
PP3862	PA3676	214	0.0084	1	PP1517	No	No	No	298/524	0.56	..
PP0968	PA1874	214	0.059	1	PP0806	No	No	No	222/380	0.58	..
PP4441	PA2424	214	7.1e-05	1	PP4243	No	No	No	98/146	0.67	..
PP5398	PA2424	214	7.1e-05	1	PP4243	No	No	No	98/146	0.67	..
PP2433	PA5265	214	0.0071	1	PP4906	No	No	No	268/473	0.56	..
PP2894	PA0891	214	0.009	1	PP1104	No	No	No	226/395	0.57	..
PP4554	PA5401	214	0.0044	1	PP0313	No	No	No	272/488	0.55	..
PP2434	PA0431	214	0.0016	1	PP5302	No	No	No	192/332	0.57	..
PP3851	PA4939	213	5.6e-05	1	PP4890	No	No	No	185/309	0.59	..
PP1551	PA2136	213	0.012	1	PP2068	No	No	No	157/258	0.6	..
PP1578	PA1651	213	0.0062	1	PP1820	No	No	No	221/387	0.57	..
PP3962	PA1436	213	0.032	1	PP3583	No	No	No	377/681	0.55	..
PP3030	PA0047	213	0.0097	1	PP3450	No	No	No	207/351	0.58	..
PP5051	PA0876	213	0.0034	1	PP1262	No	No	No	227/393	0.57	..
PP3790	PA4977	213	0.027	1	PP1394	No	Yes	No	241/438	0.55	..
PP3867	PA1254	213	4.9e-05	1	PP2036	No	No	No	111/177	0.62	..
PP3650	PA4007	212	0.012	1	PP4811	No	No	No	162/280	0.57	..
PP0635	PA1458	212	0.077	1	PP4338	No	No	No	272/484	0.56	..
PP3868	PA1458	212	0.077	1	PP4338	No	No	No	272/484	0.56	..
PP1793	PA3885	211	0.094	1	PP4737	No	No	No	315/563	0.55	..
PP4887	PA5419	211	0.004	1	PP0326	No	No	No	243/416	0.58	..
PP2875	PA0241	211	7.3e-05	1	PP2604	No	No	No	185/317	0.58	..
PP3509	PA1419	210	0.0011	1	PP0709	No	No	No	188/330	0.56	..
PP0367	PA1085	210	7.8e-05	1	PP4382	No	No	No	156/264	0.59	..
PP1937	PA1022	210	0.19	1	PP4064	No	No	No	292/510	0.57	..
PP4069	PA1164	210	6.1e-05	1	PP1527	No	No	No	134/216	0.62	..
PP0621	PA2271	210	3.3e-05	1	PP5310	No	No	No	148/252	0.58	..
PP2272	PA1909	210	0.018	1	PP0349	No	No	No	254/453	0.56	..
PP0729	PA2454	210	0.051	1	PP3927	No	No	No	230/396	0.58	..
PP3288	PA1634	209	6.2e-05	2	PP0586	No	No	No	365/670	0.54	..
PP2986	PA1247	209	0.059	1	PP2559	No	No	No	339/607	0.55	..
PP0587	PA1279	209	0.0019	1	PP1679	No	No	No	147/247	0.59	..
PP3856	PA2496	209	0.015	1	PP2497	No	No	No	157/265	0.59	..
PP3915	PA0913	209	9.3e-05	1	PP4471	No	No	No	179/304	0.58	..
PP4136	PA1978	209	5.6e-05	1	PP2665	No	No	No	121/202	0.59	..
PP1560	PA2911	208	0.00011	1	PP2420	No	No	No	100/152	0.65	..
PP5391	PA2313	208	0.012	1	PP3083	No	No	No	294/527	0.55	..
PP3064	PA4844	208	0.00011	1	PP0562	No	No	No	126/206	0.61	..
PP4742	PA1237	208	0.12	1	PP2068	No	No	No	158/263	0.6	..
PP3619	PA2627	208	0.03	1	PP4015	No	No	No	218/380	0.57	..
PP3842	PA3054	208	0.079	1	PP5222	No	No	No	260/449	0.57	..
PP3618	PA2627	208	0.03	1	PP4015	No	No	No	252/449	0.56	..
PP3843	PA3515	208	9.1e-05	1	PP1524	No	No	No	142/236	0.6	..
PP4134	PA4355	208	0.00019	1	PP2367	No	No	No	150/251	0.59	..
PP2297	PA4805	207	0.051	1	PP3718	No	No	No	243/426	0.57	..
PP3234	PA1586	207	0.036	1	PP4188	No	No	No	235/417	0.56	..
PP2967	PA4293	207	0.00013	1	PP3552	No	No	No	91/132	0.68	..
PP0571	PA1624	207	8.4e-05	1	PP4163	No	No	No	151/249	0.6	..
PP4076	PA0670	207	0.0059	1	PP3118	No	No	No	223/384	0.58	..
PP2743	PA3269	207	0.021	1	PP2383	No	No	No	121/195	0.62	..
PP2949	PA4445	207	0.04	1	PP1302	No	No	No	201/351	0.57	..
PP1196	PA1857	207	0.036	1	PP4294	No	No	No	231/408	0.56	..
PP0831	PA5175	207	0.031	1	PP0261	No	No	No	247/447	0.55	..
PP2283	PA5372	207	0.027	1	PP5064	No	No	No	301/537	0.56	..
PP2353	PA1765	207	0.00011	1	PP4211	No	No	No	159/264	0.6	..
PP2225	PA3973	207	0.00047	1	PP4243	No	No	No	205/354	0.57	..
PP0994	PA4851	206	0.021	1	PP4819	No	No	No	206/352	0.58	..
PP2698	PA4036	206	0.092	1	PP0806	No	Yes	No	466/862	0.54	..
PP2689	PA0372	206	0.0018	1	PP5112	No	No	No	132/220	0.6	..
PP3604	PA3509	206	9.9e-05	1	PP3645	No	No	No	162/271	0.59	..
PP3913	PA2304	205	0.041	1	PP4222	No	No	No	271/482	0.56	..
PP5290	PA1782	205	0.085	1	PP2091	No	No	No	103/158	0.65	..
PP5050	PA1782	205	0.085	1	PP2091	No	No	No	103/158	0.65	..
PP2134	PA1782	205	0.085	1	PP2091	No	No	No	103/158	0.65	..
PP0646	PA3667	205	0.13	1	PP1529	No	No	No	165/281	0.58	..
PP1653	PA1782	205	0.085	1	PP2091	No	No	No	103/158	0.65	..
PP0526	PA1782	205	0.085	1	PP2091	No	No	No	103/158	0.65	..
PP5224	PA0562	205	8.8e-05	1	PP3745	No	No	No	115/185	0.62	..
PP3683	PA2564	205	0.09	1	PP3721	No	No	No	167/284	0.58	..
PP3502	PA1782	205	0.085	1	PP2091	No	No	No	103/158	0.65	..
PP4599	PA1782	205	0.085	1	PP2091	No	No	No	103/158	0.65	..
PP4182	PA2091	204	0.0045	1	PP2092	No	No	No	162/264	0.61	..
PP3212	PA0368	204	0.086	1	PP5117	No	No	No	434/804	0.53	..
PP2858	PA5051	204	0.014	1	PP5089	No	No	No	196/348	0.56	..
PP1545	PA1433	204	0.018	1	PP0165	No	No	No	226/399	0.56	..
PP1706	PA1146	204	0.0013	1	PP2650	No	Yes	No	192/330	0.58	..
PP2700	PA0537	204	0.013	1	PP2068	No	No	No	204/354	0.57	..
PP4458	PA3593	204	0.18	1	PP4780	No	No	No	372/684	0.54	..
PP4376	PA2543	203	0.17	1	PP2892	No	No	No	289/523	0.55	..
PP1581	PA1223	203	0.2	1	PP2046	No	No	No	193/334	0.57	..
PP4387	PA4223	203	0.00018	1	PP2596	No	No	No	111/178	0.62	..
PP3047	PA3763	203	0.13	1	PP1037	No	No	No	379/685	0.55	..
PP0299	PA2642	203	0.021	1	PP4124	No	No	No	147/247	0.59	..
PP4939	PA1243	203	0.081	1	PP2354	No	No	No	393/721	0.54	..
PP3254	PA1260	203	0.039	1	PP4486	No	Yes	No	263/481	0.54	..
PP3866	PA5398	202	0.00021	1	PP0310	No	No	No	170/287	0.59	..
PP3014	PA3561	202	0.0014	1	PP0794	No	No	No	206/356	0.57	..
PP4584	PA5165	202	0.0043	1	PP0264	No	No	No	226/392	0.57	..
PP2969	PA2283	202	0.00019	1	PP2316	No	No	No	120/188	0.63	..
PP0731	PA1265	202	0.041	1	PP4767	No	No	No	240/419	0.57	..
PP3418	PA2521	202	0.0081	1	PP0044	No	No	No	206/350	0.58	..
PP3315	PA3195	202	0.02	1	PP1009	No	No	No	186/320	0.58	..
PP2256	PA1737	202	0.00021	1	PP2136	No	No	No	126/206	0.61	..
PP2983	PA2087	202	0.036	1	PP3761	No	No	No	196/344	0.56	..
PP3028	PA2325	202	0.00018	1	PP2755	No	No	No	172/290	0.59	..
PP2726	PA5488	202	0.051	1	PP0128	No	No	No	116/179	0.64	..
PP5211	PA0196	202	0.039	1	PP0155	No	No	No	220/392	0.56	..
PP0039	PA1843	201	0.16	1	PP2375	No	No	No	249/444	0.56	..
PP2706	PA3453	201	0.00014	1	PP2442	No	No	No	143/231	0.61	..
PP3532	PA1626	201	0.015	1	PP0970	No	No	No	101/162	0.62	..
PP3359	PA0058	201	0.017	1	PP1676	No	No	No	183/309	0.59	..
PP3783	PA1237	201	0.11	1	PP2068	No	No	#N/A	201/351	0.57	..
PP1570	PA2628	201	0.00017	1	PP3670	No	No	No	143/237	0.6	..
PP4438	PA4623	200	5.3e-05	1	PP4845	No	No	No	202/346	0.58	..
PP3500	PA4623	200	5.3e-05	1	PP4845	No	No	No	202/346	0.58	..
PP3048	PA5398	200	0.00026	1	PP0310	No	No	No	114/181	0.62	..
PP3894	PA3617	200	0.097	1	PP1629	No	No	No	218/376	0.57	..
PP1557	PA4707	200	0.0002	1	PP4688	No	No	No	186/322	0.57	..
PP3929	PA4676	200	0.00015	1	PP5190	No	No	No	122/199	0.61	..
PP2298	PA3373	200	0.00012	1	PP4469	No	No	No	184/301	0.61	..
PP2606	PA3470	200	7.7e-05	1	PP1062	No	No	No	128/202	0.63	..
PP2991	PA2155	200	0.14	1	PP3264	No	No	No	204/358	0.56	..
PP0306	PA2854	200	0.074	1	PP2320	No	No	No	234/424	0.55	..
PP3980	PA4623	200	5.3e-05	1	PP4845	No	No	No	202/346	0.58	..
PP3468	PA3848	199	0.01	1	PP4784	No	No	No	163/278	0.58	..
PP1582	PA4282	199	0.21	1	PP2024	No	No	No	547/998	0.54	..
PP2381	PA1760	199	0.00031	1	PP0767	No	No	No	127/197	0.64	..
PP2026	PA3213	199	0.00022	1	PP0140	No	No	No	113/179	0.63	..
PP3134	PA3816	199	0.066	1	PP0840	No	No	No	169/287	0.58	..
PP3277	PA2305	199	0.00032	1	PP4221	No	No	No	127/212	0.59	..
PP0653	PA0349	198	0.00026	1	PP2759	No	No	No	148/246	0.6	..
PP4040	PA2396	198	0.0029	1	PP4276	No	No	No	214/369	0.57	..
PP3321	PA2517	198	0.019	1	PP3162	No	No	No	134/225	0.59	..
PP3542	PA0041	198	0.00038	1	PP4243	No	No	No	121/208	0.58	..
PP2684	PA1960	197	0.08	1	PP2863	No	No	No	135/229	0.58	..
PP2530	PA4161	197	0.00029	1	PP2594	No	No	No	153/250	0.61	..
PP3335	PA2542	197	0.097	1	PP2893	No	No	No	333/595	0.55	..
PP4238	PA4814	197	0.00036	1	PP2008	No	No	No	107/175	0.61	..
PP3444	PA1575	197	0.022	1	PP4247	No	No	No	149/256	0.58	..
PP0738	PA2281	197	0.088	1	PP4283	No	No	No	215/367	0.58	..
PP3784	PA2904	197	0.17	1	PP4827	No	No	No	225/397	0.56	..
PP2705	PA2302	197	0.00041	1	PP4219	No	No	No	155/262	0.59	..
PP1473	PA2885	197	0.00018	1	PP4243	No	No	No	159/265	0.6	..
PP3580	PA2872	196	0.00027	1	PP2307	No	No	No	156/251	0.62	..
PP5397	PA2307	196	0.00029	1	PP0172	No	No	No	180/323	0.55	..
PP2729	PA4990	196	0.00054	1	PP4930	No	No	No	96/149	0.64	..
PP3836	PA2493	196	0.00035	1	PP3425	No	No	No	156/257	0.6	..
PP4431	PA2164	196	0.22	1	PP4051	No	Yes	No	230/413	0.55	..
PP4754	PA1296	196	0.089	1	PP4589	No	No	No	218/383	0.56	..
PP3908	PA2888	196	0.0041	1	PP4065	No	No	No	184/314	0.58	..
PP4442	PA2307	196	0.00029	1	PP0172	No	No	No	180/323	0.55	..
PP2984	PA1246	196	0.053	1	PP2560	No	No	No	196/344	0.56	..
PP3965	PA0924	196	0.00039	1	PP0096	No	No	No	160/269	0.59	..
PP0277	PA4625	195	0.0005	1	PP0806	No	No	No	155/261	0.59	..
PP2279	PA0757	195	0.39	1	PP1421	No	No	No	403/747	0.53	..
PP1818	PA1335	195	0.15	1	PP1066	No	No	No	103/168	0.61	..
PP1954	PA3075	195	0.29	1	PP2027	No	No	No	309/567	0.54	..
PP3907	PA4439	195	0.046	1	PP1311	No	No	No	185/318	0.58	..
PP3295	PA0041	195	0.07	1	PP4243	No	No	No	255/450	0.56	..
PP0752	PA2684	195	0.00048	1	PP4243	No	No	No	91/138	0.65	..
PP2473	PA1611	195	0.25	1	PP4173	No	No	No	303/552	0.54	..
PP1544	PA1434	194	0.015	1	PP0164	No	No	No	128/211	0.6	..
PP3362	PA2348	194	0.045	1	PP0222	No	No	No	188/316	0.59	..
PP2721	PA4921	194	0.0052	1	PP0806	No	No	No	198/337	0.58	..
PP4317	PA0091	193	0.00054	1	PP3106	No	No	No	89/143	0.62	..
PP1542	PA5100	193	0.13	1	PP5033	No	No	No	175/302	0.57	..
PP1585	PA0393	193	0.00039	1	PP5095	No	No	No	145/245	0.59	..
PP1926	PA2210	193	0.079	1	PP1710	No	No	No	203/368	0.55	..
PP2492	PA0040	193	0.35	1	PP1450	No	No	No	129/212	0.6	..
PP3026	PA4513	192	0.56	1	PP0860	No	No	No	214/378	0.56	..
PP3969	PA0928	192	0.019	1	PP1650	No	No	No	206/369	0.55	..
PP4252	PA2665	192	0.00057	1	PP0807	No	Yes	No	92/150	0.61	..
PP1924	PA5231	192	0.13	1	PP5207	No	No	No	278/498	0.55	..
PP4068	PA3455	191	0.21	1	PP1752	No	No	No	297/526	0.56	..
PP3975	PA1017	191	0.084	1	PP4243	No	No	No	115/193	0.59	..
PP4557	PA0439	191	0.00059	1	PP4038	No	No	No	109/178	0.61	..
PP1447	PA3091	191	0.00062	1	PP3075	No	No	No	137/232	0.59	..
PP2900	PA2040	190	0.03	1	PP5184	No	No	No	122/203	0.6	..
PP0498	PA2044	190	0.33	1	PP2148	No	No	No	440/818	0.53	..
PP4614	PA2747	189	0.00023	1	PP1833	No	No	No	159/276	0.57	..
PP1535	PA0153	189	0.071	1	PP4656	No	No	No	211/384	0.54	..
PP2190	PA2245	189	0.00021	1	PP3221	No	No	No	107/168	0.63	..
PP2219	PA0091	189	0.033	1	PP3106	No	No	No	97/162	0.59	..
PP1947	PA5159	189	0.38	1	PP3549	No	No	No	183/321	0.57	..
PP1101	PA0814	189	0.00024	1	PP5058	No	No	No	139/222	0.62	..
PP3611	PA1686	189	0.15	1	PP1516	No	No	No	107/165	0.64	..
PP3402	PA4322	188	0.051	1	PP2032	No	No	No	180/310	0.58	..
PP5280	PA3666	188	0.047	1	PP1530	No	No	No	124/208	0.59	..
PP3126	PA0613	188	0.024	1	PP4012	No	No	No	108/175	0.61	..
PP2524	PA0168	188	0.15	1	PP0593	No	No	No	128/211	0.6	..
PP2537	PA2555	188	0.00088	1	PP2213	No	No	No	152/256	0.59	..
PP4430	PA4470	188	0.43	1	PP0944	No	Yes	No	188/325	0.57	..
PP2874	PA5145	188	0.00077	1	PP2910	No	No	No	154/271	0.56	..
PP2267	PA4496	188	0.27	1	PP0884	No	No	No	212/385	0.55	..
PP3363	PA4582	188	0.2	1	PP0199	No	No	No	246/445	0.55	..
PP2441	PA1085	187	0.00089	1	PP4382	No	No	No	125/203	0.61	..
PP0071	PA5391	187	0.083	1	PP3572	No	No	No	195/347	0.56	..
PP0943	PA0131	186	0.00033	1	PP2817	No	No	No	146/249	0.58	..
PP0755	PA4637	186	0.00032	1	PP1202	No	No	No	122/207	0.58	..
PP2461	PA3230	186	0.00096	1	PP4543	No	No	No	134/222	0.6	..
PP4847	PA5106	186	0.001	1	PP5036	No	No	No	138/222	0.62	..
PP5382	PA4917	186	0.023	1	PP3075	No	No	No	110/183	0.6	..
PP3770	PA0370	185	0.00069	1	PP5114	No	No	No	99/151	0.65	..
PP3018	PA0229	185	0.0011	1	PP1378	No	No	No	139/232	0.59	..
PP0627	PA2269	185	0.0011	1	PP3961	No	No	No	115/175	0.65	..
PP1945	PA4290	185	0.49	1	PP2111	No	Yes	No	167/286	0.58	..
PP2825	PA5038	185	0.14	1	PP5078	No	No	No	195/346	0.56	..
PP0643	PA0172	185	0.0013	1	PP4124	No	No	No	109/175	0.62	..
PP2053	PA4612	184	0.0007	1	PP1834	No	No	No	54/71	0.76	..
PP3785	PA4545	184	0.69	1	PP0622	No	No	No	188/323	0.58	..
PP3680	PA4660	184	0.89	1	PP0739	No	No	No	218/392	0.55	..
PP4529	PA3003	184	0.00082	1	PP2147	No	No	No	106/170	0.62	..
PP0775	PA5320	184	0.0012	1	PP5285	No	No	No	160/278	0.57	..
PP2501	PA4051	184	0.7	1	PP0519	No	No	No	226/401	0.56	..
PP4585	PA1612	184	0.14	1	PP4172	No	No	No	164/281	0.58	..
PP0050	PA0879	184	0.1	1	PP3725	No	No	No	214/380	0.56	..
PP1956	PA3472	184	0.4	1	PP5092	No	No	No	120/194	0.61	..
PP2382	PA4740	184	0.75	1	PP4708	No	No	No	354/653	0.54	..
PP1136	PA3080	183	0.72	1	PP2018	No	No	No	127/210	0.6	..
PP3901	PA2381	183	0.0005	1	PP3116	No	No	No	125/222	0.56	..
PP5401	PA0411	183	0.4	1	PP4989	No	No	No	109/177	0.61	..
PP4662	PA2534	183	0.0012	1	PP2534	No	No	No	155/261	0.59	..
PP2895	PA4728	183	0.19	1	PP4698	No	No	No	143/246	0.58	..
PP1253	PA2498	183	0.016	1	PP1834	No	No	No	165/288	0.57	..
PP2223	PA1072	183	0.25	1	PP1139	No	No	No	187/318	0.58	..
PP4642	PA2494	183	0.11	1	PP3426	No	No	No	137/234	0.58	..
PP4139	PA1243	183	0.0016	1	PP2354	No	No	No	127/213	0.59	..
PP0291	PA1795	183	0.0014	1	PP2905	No	No	No	147/255	0.57	..
PP3882	PA4796	183	0.085	1	PP3592	No	No	No	211/369	0.57	..
PP3432	PA3308	183	0.55	1	PP1145	No	No	No	433/801	0.54	..
PP2295	PA4064	182	0.26	1	PP0507	No	No	No	222/397	0.55	..
PP1564	PA4467	182	0.0014	1	PP0947	No	No	No	90/142	0.63	..
PP2996	PA4226	182	0.24	1	PP4219	No	No	No	154/262	0.58	..
PP4229	PA3198	182	0.31	1	PP4498	No	No	No	186/325	0.57	..
PP0727	PA0683	182	0.35	1	PP3753	No	No	No	336/607	0.55	..
PP1774	PA0072	182	0.0015	1	PP1145	No	No	No	142/241	0.58	..
PP1580	PA1351	182	0.19	1	PP4553	No	No	No	126/211	0.59	..
PP3850	PA2968	182	0.0014	1	PP1913	No	No	No	98/154	0.63	..
PP2020	PA4311	182	0.054	1	PP1370	No	No	No	162/283	0.57	..
PP0278	PA0929	181	0.0013	1	PP1651	No	No	No	103/161	0.63	..
PP4135	PA2600	181	0.053	1	PP3219	No	No	No	171/290	0.58	..
PP3626	PA5253	181	0.0016	1	PP0194	No	No	No	87/137	0.63	..
PP3043	PA0685	181	0.002	1	PP1046	No	No	No	99/158	0.62	..
PP4534	PA3068	181	0.0021	1	PP2080	No	No	No	105/170	0.61	..
PP0531	PA5358	181	0.69	1	PP5318	No	No	No	153/260	0.58	..
PP3773	PA5532	181	0.067	1	PP5359	No	No	No	185/314	0.58	..
PP3313	PA3487	181	0.11	1	PP1703	No	No	No	151/263	0.57	..
PP5378	PA2357	181	0.37	1	PP2764	No	No	No	139/233	0.59	..
PP2660	PA0838	181	0.31	1	PP0777	No	No	No	245/449	0.54	..
PP0912	PA0748	180	0.37	1	PP4605	No	No	No	128/216	0.59	..
PP1938	PA3879	180	0.0013	1	PP4099	No	No	No	164/285	0.57	..
PP5377	PA2138	180	0.27	1	PP3260	No	No	No	96/153	0.62	..
PP4535	PA0735	180	0.93	1	PP2383	No	No	No	246/441	0.55	..
PP2222	PA2153	180	0.0022	1	PP4058	No	No	No	100/153	0.65	..
PP2186	PA0086	180	0.0016	1	PP4243	No	Yes	No	112/183	0.61	..
PP1118	PA4174	180	0.9	1	PP1853	No	No	No	160/279	0.57	..
PP4466	PA3935	180	0.59	1	PP0230	No	No	No	92/144	0.63	..
PP3135	PA2167	179	0.002	2	PP2237	No	No	No	133/223	0.59	..
PP5399	PA3465	179	0.65	1	PP5251	No	No	No	211/379	0.55	..
PP1962	PA1068	179	0.98	1	PP4243	No	No	No	261/469	0.55	..
PP2511	PA4825	179	0.23	1	PP2645	No	No	No	139/241	0.57	..
PP1923	PA3901	179	0.81	1	PP4613	No	No	No	389/715	0.54	..
PP4450	PA0677	179	0.37	1	PP1655	No	No	No	205/355	0.57	..
PP3919	PA4532	178	0.0017	1	PP0629	No	No	No	110/176	0.62	..
PP3967	PA3470	178	0.13	1	PP1062	No	No	No	176/302	0.58	..
PP4446	PA1499	178	0.85	1	PP4300	No	No	No	210/380	0.55	..
PP1265	PA3781	178	0.0024	1	PP1167	No	No	No	112/182	0.61	..
PP1439	PA0428	177	0.0029	1	PP4980	No	No	No	99/150	0.66	..
PP3401	PA3552	177	0.0025	1	PP1007	No	No	No	107/174	0.61	..
PP3698	PA0441	177	0.96	1	PP4546	No	No	No	275/513	0.53	..
PP1539	PA3713	177	0.52	1	PP2205	No	No	No	243/435	0.55	..
PP3874	PA4327	176	0.15	1	PP4658	No	No	No	206/367	0.56	..
PP2976	PA2920	176	0.018	1	PP1228	No	No	No	138/229	0.6	..
PP3524	PA0148	176	0.068	1	PP0591	No	No	No	148/253	0.58	..
PP1891	PA4179	176	0.49	1	PP3764	No	No	No	292/538	0.54	..
PP3588	PA0782	176	0.95	1	PP4947	No	No	No	108/178	0.6	..
PP2644	PA3555	176	0.0025	1	PP1749	No	No	No	84/130	0.64	..
PP2289	PA4896	176	0.28	1	PP3086	No	No	No	166/283	0.58	..
PP3160	PA4219	176	0.84	1	PP3734	No	No	No	84/133	0.63	..
PP3268	PA3192	176	0.19	1	PP1012	No	No	No	212/379	0.55	..
PP1111	PA5556	176	0.77	1	PP5415	No	No	No	176/301	0.58	..
PP0905	PA3226	176	0.0024	1	PP4540	No	No	No	90/139	0.64	..
PP1712	PA3294	175	0.98	1	PP4049	No	No	No	299/560	0.53	..
PP0648	PA2835	175	0.41	1	PP1271	No	No	No	179/317	0.56	..
PP1572	PA2292	175	0.001	1	PP2064	No	No	No	123/203	0.6	..
PP4457	PA3034	175	0.8	1	PP0260	No	No	No	147/248	0.59	..
PP2681	PA5357	174	0.0021	1	PP5317	No	No	No	140/234	0.59	..
PP3504	PA4008	174	0.0035	1	PP3726	No	No	No	118/195	0.6	..
PP2699	PA1376	173	0.96	1	PP4565	No	No	No	95/151	0.62	..
PP3697	PA5030	173	0.9992	1	PP5072	No	No	No	213/373	0.57	..
PP2899	PA4133	173	0.0041	1	PP4255	No	No	No	97/157	0.61	..
PP3855	PA3766	173	0.004	1	PP1271	No	No	No	111/184	0.6	..
PP0085	PA2325	172	0.57	1	PP2755	No	No	No	108/176	0.61	..
PP2508	PA0380	172	0.0019	1	PP5105	No	No	No	122/197	0.61	..
PP4195	PA0851	172	0.004	1	PP5149	No	No	No	146/257	0.56	..
PP1211	PA4225	172	0.2	1	PP4243	No	No	No	132/224	0.58	..
PP0016	PA3247	172	0.9993	1	PP1730	No	No	No	170/287	0.59	..
PP3113	PA1650	171	0.24	1	PP3247	No	No	No	171/300	0.57	..
PP1933	PA5206	171	0.0048	1	PP5186	No	No	No	121/195	0.62	..
PP3659	PA3844	171	0.96	1	PP0335	No	No	No	231/417	0.55	..
PP3986	PA1650	171	0.23	1	PP3247	No	No	No	171/300	0.57	..
PP5390	PA4029	171	0.0036	1	PP0540	No	No	No	103/171	0.6	..
PP1534	PA5304	171	0.099	1	PP5270	No	No	No	151/264	0.57	..
PP4133	PA0886	171	0.33	1	PP1167	No	No	No	193/333	0.57	..
PP2873	PA3772	171	0.098	1	PP2029	No	No	No	131/222	0.59	..
PP3906	PA3975	171	0.004	1	PP4782	No	No	No	103/168	0.61	..
PP1533	PA2352	171	0.0047	1	PP3075	No	No	No	115/195	0.58	..
PP1693	PA2350	171	0.0047	1	PP0220	No	No	No	97/159	0.61	..
PP3703	PA4078	170	0.96	1	PP4221	No	No	No	118/199	0.59	..
PP5247	PA3301	170	0.4	1	PP4551	No	No	No	126/211	0.59	..
PP3104	PA0136	170	0.98	1	PP2759	No	No	No	100/157	0.63	..
PP3033	PA5363	169	0.9	1	PP5323	No	No	No	143/248	0.57	..
PP3708	PA1834	169	0.98	1	PP4634	No	No	No	109/176	0.61	..
PP3892	PA2921	169	0.0056	1	PP2539	No	No	No	113/191	0.59	..
PP1243	PA0267	169	0.006	1	PP0215	No	No	No	75/113	0.66	..
PP1540	PA5047	169	0.0063	1	PP5327	No	No	No	109/173	0.63	..
PP3032	PA4417	168	0.007	1	PP1332	No	No	No	154/264	0.58	..
PP2529	PA4161	168	0.0063	1	PP2594	No	No	No	88/138	0.63	..
PP1950	PA3876	168	0.998	1	PP4583	No	No	No	96/150	0.64	..
PP5176	PA5320	168	0.83	1	PP5285	No	No	No	216/384	0.56	..
PP1558	PA2600	168	0.27	1	PP3219	No	No	No	150/261	0.57	..
PP5369	PA4290	168	0.44	1	PP2111	No	No	No	106/174	0.6	..
PP4428	PA5385	167	0.89	1	PP0301	No	No	No	145/244	0.59	..
PP1199	PA4269	167	0.34	1	PP0448	No	No	No	71/109	0.65	..
PP3510	PA1056	167	0.42	1	PP2228	No	No	No	183/319	0.57	..
PP1952	PA1380	167	0.99	1	PP2425	No	No	No	203/358	0.56	..
PP2654	PA3885	167	0.52	1	PP4737	No	No	No	117/199	0.58	..
PP3293	PA1708	167	0.63	1	PP4276	No	No	No	147/262	0.56	..
PP1268	PA1884	167	0.37	1	PP2091	No	No	No	133/223	0.59	..
PP2631	PA2946	167	0.0071	1	PP3506	No	No	No	101/169	0.59	..
PP2640	PA5355	166	0.78	1	PP3745	No	No	No	246/437	0.56	..
PP0211	PA2994	166	0.0082	1	PP5128	No	No	No	104/170	0.61	..
PP4257	PA2241	166	0.0086	1	PP0804	No	Yes	No	54/74	0.72	..
PP1958	PA2450	166	0.98	1	PP2024	No	No	No	154/272	0.56	..
PP2452	PA5487	166	0.0092	1	PP0129	No	No	No	108/179	0.6	..
PP3780	PA2055	166	0.0086	1	PP1388	No	No	No	90/140	0.64	..
PP3027	PA2154	166	0.0077	1	PP3263	No	No	No	88/143	0.61	..
PP4346	PA0896	166	0.997	1	PP4480	No	Yes	No	118/200	0.59	..
PP3963	PA0186	166	0.26	1	PP3229	No	No	No	94/149	0.63	..
PP2499	PA5473	166	0.009	1	PP0145	No	No	No	90/149	0.6	..
PP2937	PA0576	166	0.7	1	PP0387	No	No	No	96/155	0.61	..
PP1212	PA2010	166	0.0069	1	PP4622	No	No	No	92/146	0.63	..
PP1549	PA0352	165	0.995	1	PP3992	No	No	No	313/558	0.56	..
PP4153	PA0244	165	0.0079	1	PP2406	No	No	No	91/141	0.64	..
PP4061	PA3126	165	0.0043	1	PP1982	No	No	No	75/108	0.69	..
PP2510	PA2850	165	0.004	1	PP1859	No	No	No	123/207	0.59	..
PP3031	PA0427	165	0.26	1	PP1384	No	No	No	171/288	0.59	..
PP1130	PA5382	165	0.14	1	PP1637	No	No	No	91/150	0.6	..
PP4084	PA0787	165	0.73	1	PP2525	No	No	No	161/285	0.56	..
PP2583	PA2258	165	0.9	1	PP1164	No	No	No	173/309	0.55	..
PP0021	PA1245	165	0.997	1	PP4243	No	No	No	103/165	0.62	..
PP1812	PA2336	165	0.0094	1	PP4737	No	No	No	71/105	0.67	..
PP3236	PA4290	164	5e-05	2	PP2111	No	No	No	126/208	0.6	..
PP0177	PA2278	164	0.01	1	PP2717	No	No	No	108/178	0.6	..
PP3883	PA3558	164	0.14	1	PP1676	No	No	No	176/313	0.56	..
PP3873	PA2660	163	0.92	1	PP2344	No	No	No	247/446	0.55	..
PP4569	PA1459	163	0.11	1	PP4337	No	No	No	179/305	0.58	..
PP2581	PA2910	163	0.38	1	PP2812	No	No	No	135/224	0.6	..
PP1729	PA4551	163	0.0073	1	PP0724	No	No	No	77/119	0.64	..
PP3523	PA1211	163	0.45	1	PP2760	No	No	No	191/338	0.56	..
PP4455	PA5234	163	0.999	1	PP5210	No	No	No	195/356	0.54	..
PP4561	PA3675	162	0.0096	1	PP1518	No	No	No	96/159	0.6	..
PP3902	PA1488	162	0.3	1	PP4261	No	No	No	106/174	0.6	..
PP1568	PA3250	162	0.012	1	PP1726	No	No	No	120/207	0.57	..
PP4086	PA5017	162	0.98	1	PP0337	No	No	No	198/351	0.56	..
PP1671	PA1313	161	0.014	1	PP4951	No	No	No	99/163	0.6	..
PP1964	PA3946	161	0.9998	1	PP2100	No	No	No	197/340	0.57	..
PP0022	PA3675	161	0.73	1	PP1518	No	No	No	83/130	0.63	..
PP4415	PA5332	161	0.99993	1	PP5292	No	No	No	129/214	0.6	..
PP1123	PA1772	161	0.0077	1	PP2084	No	No	No	91/145	0.62	..
PP0655	PA0085	161	0.31	1	PP1351	No	No	No	145/262	0.55	..
PP3648	PA1670	161	0.71	1	PP5133	No	Yes	No	91/145	0.62	..
PP5381	PA0779	160	0.018	1	PP1443	No	No	No	86/134	0.64	..
PP4100	PA0327	160	0.8	1	PP5151	No	No	No	204/356	0.57	..
PP0027	PA2973	160	0.91	1	PP1908	No	No	No	134/239	0.56	..
PP0645	PA1436	160	0.071	1	PP3583	No	No	No	96/158	0.6	..
PP1991	PA3641	160	0.016	1	PP0496	No	No	No	106/173	0.61	..
PP3983	PA4689	160	0.9999	1	PP0599	No	No	No	152/266	0.57	..
PP3791	PA3618	160	0.96	1	PP1628	No	No	No	130/218	0.59	..
PP2342	PA2997	160	0.013	1	PP3745	No	No	No	104/179	0.58	..
PP2972	PA2385	160	0.32	1	PP2901	No	No	No	168/284	0.59	..
PP1390	PA3728	159	0.021	1	PP4243	No	No	No	79/120	0.65	..
PP2788	PA3074	159	0.87	1	PP2028	No	No	No	189/345	0.54	..
PP5393	PA0702	159	0.015	1	PP2024	No	No	No	77/123	0.62	..
PP3297	PA0690	159	0.996	1	PP0806	No	No	No	145/258	0.56	..
PP3899	PA0861	159	0.68	1	PP1761	No	No	No	157/276	0.56	..
PP3826	PA1282	159	0.018	1	PP3377	No	No	No	99/156	0.63	..
PP2269	PA3521	159	0.96	1	PP3427	No	No	No	81/123	0.65	..
PP3407	PA1212	158	0.019	1	PP1696	No	No	No	120/205	0.58	..
PP4151	PA0075	158	0.95	1	PP4673	No	No	No	110/181	0.6	..
PP3300	PA2803	158	0.995	1	PP2162	No	No	No	198/346	0.57	..
PP1276	PA2701	158	0.98	1	PP5251	No	No	No	170/301	0.56	..
PP2374	PA0710	158	0.0076	1	PP3766	No	No	No	114/187	0.6	..
PP3918	PA3282	158	0.015	1	PP2399	No	No	No	68/106	0.64	..
PP2809	PA2408	158	0.9992	1	PP3802	No	No	No	70/109	0.64	..
PP3057	PA5053	157	0.998	1	PP5000	No	No	No	125/218	0.57	..
PP4462	PA2643	157	0.9996	1	PP4125	No	No	No	83/134	0.61	..
PP1148	PA2244	157	0.02	1	PP3831	No	No	No	75/110	0.68	..
PP3928	PA4578	157	0.2	1	PP0679	No	No	No	123/209	0.58	..
PP3771	PA0778	157	0.64	1	PP1442	No	No	No	95/155	0.61	..
PP2965	PA4293	157	0.89	1	PP3552	No	No	No	143/248	0.57	..
PP2268	PA2397	157	0.97	1	PP4216	No	No	No	101/164	0.61	..
PP1244	PA0403	157	0.7	1	PP4997	No	No	No	87/140	0.62	..
PP5363	PA1527	156	0.9993	1	PP4276	No	No	No	184/324	0.56	..
PP1485	PA3829	156	0.021	1	PP2409	No	No	No	86/135	0.63	..
PP3109	PA2906	156	0.98	1	PP4829	No	No	No	84/129	0.65	..
PP1537	PA0090	156	0.027	1	PP3095	No	No	No	124/207	0.59	..
PP2079	PA2703	156	0.024	1	PP1649	No	No	No	132/225	0.58	..
PP3909	PA2993	155	0.22	1	PP2150	No	No	No	107/178	0.6	..
PP3702	PA3429	155	0.023	1	PP4624	No	No	No	105/166	0.63	..
PP1691	PA4416	155	0.027	1	PP1333	No	No	No	101/166	0.6	..
PP3840	PA5334	155	0.021	1	PP5294	No	No	No	71/106	0.66	..
PP1546	PA1053	155	0.014	1	PP1131	No	No	No	67/97	0.69	..
PP2278	PA2591	155	0.022	1	PP3847	No	No	No	103/175	0.58	..
PP4152	PA5179	155	0.9993	1	PP4601	No	No	No	71/109	0.65	..
PP3615	PA2429	155	0.016	1	PP4737	No	No	No	117/199	0.58	..
PP3876	PA0924	155	0.82	1	PP0096	No	No	No	145/244	0.59	..
PP1687	PA2984	154	0.67	1	PP1897	No	No	No	138/239	0.57	..
PP3328	PA3025	154	0.99	1	PP1073	No	No	No	88/137	0.64	..
PP2446	PA4809	154	0.026	1	PP0492	No	No	No	104/170	0.61	..
PP5316	PA3096	154	0.028	1	PP5133	No	No	No	66/95	0.69	..
PP3318	PA1176	154	0.017	1	PP0175	No	No	No	134/224	0.59	..
PP3010	PA3977	153	0.97	1	PP4784	No	No	No	175/315	0.55	..
PP4593	PA2135	153	0.033	1	PP2028	No	No	No	101/177	0.57	..
PP5049	PA2055	153	0.033	1	PP1388	No	No	No	51/72	0.7	..
PP1089	PA2347	153	0.9992	1	PP0223	No	No	No	71/111	0.63	..
PP3841	PA4524	153	0.95	1	PP0787	No	No	No	89/144	0.61	..
PP2939	PA1212	153	0.032	1	PP1696	No	No	No	85/129	0.65	..
PP0040	PA0482	153	0.036	1	PP0356	No	No	No	125/210	0.59	..
PP3039	PA4091	151	0.99	1	PP4261	No	No	No	101/170	0.59	..
PP0771	PA5147	151	0.96	1	PP0286	No	No	No	151/263	0.57	..
PP3937	PA2368	151	0.02	1	PP3427	No	No	No	59/83	0.71	..
PP0770	PA5114	150	0.052	1	PP2024	No	No	No	122/210	0.58	..
PP3013	PA5249	150	0.033	1	PP0198	No	No	No	98/156	0.62	..
PP2970	PA0344	150	0.99	1	PP5134	No	No	No	98/156	0.62	..
PP3987	PA3057	150	0.16	1	PP1256	No	No	No	86/135	0.63	..
PP4707	PA2058	149	0.993	1	PP4147	No	No	No	139/235	0.59	..
PP2291	PA1851	149	0.76	1	PP3242	No	No	No	85/139	0.61	..
PP2980	PA2003	149	0.041	1	PP3073	No	No	No	97/163	0.59	..
PP2500	PA0354	149	0.82	1	PP5127	No	No	No	157/271	0.57	..
PP1586	PA3072	149	0.45	1	PP2030	No	No	No	103/169	0.6	..
PP2544	PA0818	149	0.015	1	PP5088	No	No	No	109/175	0.62	..
PP1172	PA3914	148	0.054	1	PP2123	No	No	No	116/206	0.56	..
PP2275	PA1770	148	0.061	1	PP2082	No	No	No	96/149	0.64	..
PP2917	PA4339	148	0.052	1	PP0892	No	No	No	64/92	0.69	..
PP3898	PA4726	148	0.056	1	PP4696	No	No	No	106/176	0.6	..
PP1242	PA1671	148	0.051	1	PP4338	No	No	No	70/110	0.63	..
PP3008	PA2272	148	0.84	1	PP1331	No	No	No	112/185	0.6	..
PP3935	PA1608	148	0.057	1	PP0317	No	No	No	96/152	0.63	..
PP3978	PA0285	148	0.06	1	PP0218	No	No	No	70/104	0.67	..
PP2720	PA4123	147	0.062	1	PP3646	No	No	No	89/147	0.6	..
PP0032	PA3220	147	0.051	1	PP4511	No	No	No	49/66	0.74	..
PP3900	PA5297	147	0.064	1	PP3365	No	No	No	129/216	0.59	..
PP4649	PA4672	146	0.048	1	PP0720	No	No	No	86/142	0.6	..
PP3679	PA4437	146	0.99	1	PP3455	No	No	No	146/259	0.56	..
PP2610	PA5271	146	0.024	1	PP0181	No	No	No	130/223	0.58	..
PP4271	PA4270	146	0.078	1	PP0447	No	No	No	52/70	0.74	..
PP2498	PA2406	145	0.052	1	PP3800	No	No	No	81/128	0.63	..
PP2504	PA3179	145	0.072	1	PP5187	No	No	No	79/128	0.61	..
PP3036	PA0555	145	0.071	1	PP4960	No	No	No	81/131	0.61	..
PP5388	PA4260	145	0.998	1	PP0457	No	No	No	109/182	0.59	..
PP3306	PA0766	145	0.076	1	PP1430	No	No	No	65/92	0.7	..
PP4418	PA5046	145	0.996	1	PP5085	No	No	No	91/143	0.63	..
PP4374	PA3394	145	0.95	1	PP5207	No	No	No	99/161	0.61	..
PP1575	PA3800	145	0.072	1	PP0856	No	No	No	75/119	0.63	..
PP3684	PA4872	144	0.98	1	PP1389	No	No	No	84/144	0.58	..
PP1480	PA2757	144	0.21	1	PP2251	No	No	No	118/204	0.57	..
PP0754	PA5487	144	0.997	1	PP0129	No	No	No	72/114	0.63	..
PP4861	PA0007	144	0.087	1	PP2080	No	No	No	82/138	0.59	..
PP1685	PA4845	143	0.097	1	PP0561	No	No	No	71/112	0.63	..
PP2938	PA5348	143	0.991	1	PP5313	No	No	No	119/205	0.58	..
PP1174	PA5388	143	0.083	1	PP0304	No	No	No	75/121	0.61	..
PP2484	PA4795	143	0.91	1	PP3646	No	No	No	81/127	0.63	..
PP4205	PA3275	143	0.76	1	PP3083	No	No	No	47/70	0.67	..
PP3240	PA1621	142	0.087	1	PP4165	No	No	No	50/71	0.7	..
PP3442	PA4013	142	0.082	1	PP4815	No	No	No	58/86	0.67	..
PP2290	PA1857	141	0.1	1	PP4294	No	No	No	131/234	0.55	..
PP3115	PA2413	141	0.9998	1	PP4223	No	No	No	65/96	0.67	..
PP3984	PA2413	141	0.85	1	PP4223	No	No	No	65/96	0.67	..
PP0098	PA0399	141	0.11	1	PP4571	No	No	No	43/60	0.71	..
PP4044	PA1352	140	0.12	1	PP0503	No	No	No	52/73	0.71	..
PP1180	PA4763	140	0.13	1	PP4729	No	No	No	58/85	0.68	..
PP4095	PA3406	140	0.99	1	PP2560	No	No	No	44/61	0.72	..
PP2274	PA0464	140	0.13	1	PP4158	No	No	No	110/184	0.59	..
PP2850	PA3304	140	0.11	1	PP1152	No	No	No	76/118	0.64	..
PP4117	PA1880	139	0.15	1	PP2478	No	No	No	81/128	0.63	..
PP1550	PA4303	139	0.13	1	PP2024	No	No	No	85/137	0.62	..
PP2655	PA5165	139	0.14	1	PP0264	No	No	No	105/173	0.6	..
PP1746	PA0895	138	0.15	1	PP4481	No	No	No	98/168	0.58	..
PP4739	PA3930	138	0.39	1	PP4651	No	No	No	100/165	0.6	..
PP3904	PA3452	138	0.92	1	PP1251	No	No	No	66/99	0.66	..
PP1704	PA2473	138	0.12	1	PP4619	No	No	No	72/111	0.64	..
PP0644	PA2996	138	0.12	1	PP2067	No	No	No	50/72	0.69	..
PP3936	PA1007	137	0.16	1	PP1234	No	No	No	57/85	0.67	..
PP0608	PA1487	137	0.17	1	PP4221	No	No	No	77/121	0.63	..
PP2940	PA0043	136	0.99995	1	PP1819	No	No	No	54/77	0.7	..
PP3111	PA1113	136	0.19	1	PP2119	No	No	No	52/74	0.7	..
PP3880	PA5545	135	0.0007	2	PP3954	No	No	No	43/57	0.75	..
PP3903	PA1220	135	0.2	1	PP1325	No	No	No	59/87	0.67	..
PP3317	PA5555	135	0.18	1	PP5414	No	No	No	67/102	0.65	..
PP4449	PA3487	134	0.998	1	PP1703	No	No	No	64/100	0.64	..
PP4132	PA3759	134	0.9993	1	PP5409	No	No	No	100/163	0.61	..
PP2170	PA0627	134	0.49	1	PP4669	No	No	No	54/82	0.65	..
PP2878	PA3112	134	0.2	1	PP1996	No	No	No	52/73	0.71	..
PP2520	PA4850	133	0.22	1	PP4818	No	No	No	57/86	0.66	..
PP4360	PA4836	132	0.23	1	PP2024	No	No	No	48/66	0.72	..
PP2966	PA2305	132	0.29	1	PP4221	No	No	No	66/105	0.62	..
PP0275	PA4348	132	0.23	1	PP0147	No	No	No	86/144	0.59	..
PP0981	PA1817	132	0.14	1	PP2998	No	No	No	92/153	0.6	..
PP2115	PA1155	132	0.26	1	PP1177	No	No	No	80/138	0.57	..
PP2963	PA3796	131	0.22	1	PP5067	No	No	No	69/115	0.6	..
PP3110	PA1096	131	0.091	1	PP0911	No	No	No	69/106	0.65	..
PP4170	PA1915	131	0.3	1	PP3095	No	No	No	41/58	0.7	..
PP2580	PA1721	130	0.2	1	PP4276	No	No	No	64/101	0.63	..
PP2022	PA3279	130	0.95	1	PP0037	No	No	No	94/158	0.59	..
PP2061	PA0895	130	0.31	1	PP4481	No	No	No	58/89	0.65	..
PP0757	PA1854	130	0.31	1	PP2349	No	No	No	98/164	0.59	..
PP3642	PA2846	130	0.29	1	PP1863	No	No	No	48/71	0.67	..
PP3832	PA2657	130	0.26	1	PP2347	No	No	No	104/182	0.57	..
PP2509	PA0583	130	0.23	1	PP0393	No	No	No	66/107	0.61	..
PP3872	PA0052	129	0.22	1	PP0539	No	No	No	67/102	0.65	..
PP0811	PA1750	129	0.995	1	PP2324	No	No	No	89/150	0.59	..
PP2763	PA3121	129	0.35	1	PP1985	No	No	No	91/150	0.6	..
PP0078	PA3530	129	0.14	1	PP1083	No	No	No	51/75	0.68	..
PP2135	PA3898	128	0.34	1	PP4605	No	No	No	46/67	0.68	..
PP3012	PA3359	128	0.36	1	PP3221	No	No	No	40/52	0.76	..
PP1662	PA1626	127	0.97	1	PP0970	No	No	No	113/191	0.59	..
PP3701	PA1150	126	0.46	1	PP1306	No	No	No	80/129	0.62	..
PP0764	PA0744	126	0.43	1	PP1412	No	No	No	80/123	0.65	..
PP3347	PA2426	125	0.38	1	PP4244	No	No	No	65/103	0.63	..
PP0038	PA0901	125	0.45	1	PP4475	No	No	No	75/115	0.65	..
PP3682	PA4934	124	0.22	1	PP4876	No	No	No	64/104	0.61	..
PP0042	PA5368	124	0.53	1	PP5328	No	No	No	90/149	0.6	..
PP2719	PA0170	124	0.31	1	PP4219	No	No	No	32/41	0.78	..
PP1249	PA1943	124	0.5	1	PP2957	No	No	No	48/68	0.7	..
PP0783	PA3618	123	0.42	1	PP1628	No	No	No	77/129	0.59	..
PP1609	PA0779	123	0.58	1	PP1443	No	No	No	49/72	0.68	..
PP3434	PA2202	122	0.51	1	PP0656	No	No	No	56/88	0.63	..
PP1107	PA5112	119	0.72	1	PP0418	No	No	No	29/34	0.85	..
PP3848	PA3772	119	0.67	1	PP2029	No	No	No	47/67	0.7	..
PP2979	PA2742	118	0.84	1	PP2467	No	No	No	40/56	0.71	..
PP3792	PA3936	118	0.7	1	PP0231	No	No	No	56/86	0.65	..
PP2373	PA3140	117	0.49	1	PP1813	No	No	No	57/90	0.63	..
PP1856	PA3759	116	0.79	1	PP5409	No	No	No	54/82	0.65	..
PP0025	PA0886	116	0.81	1	PP1167	No	No	No	42/64	0.65	..
PP0374	PA2528	116	0.81	1	PP3585	No	No	No	88/142	0.61	..
PP4062	PA4625	115	0.88	1	PP0806	No	No	No	51/77	0.66	..
PP2280	PA2809	115	0.78	1	PP2158	No	No	No	55/83	0.66	..
PP3686	PA2700	114	0.87	1	PP5250	No	No	No	48/72	0.66	..
PP1176	PA2850	113	0.77	1	PP1859	No	No	No	55/85	0.64	..
PP4414	PA3628	113	0.87	1	PP1617	No	No	No	51/73	0.69	..
PP3809	PA2368	112	0.8	1	PP3427	No	No	No	42/59	0.71	..
PP1521	PA2197	111	0.93	1	PP2476	No	No	No	39/57	0.68	..
PP3921	PA1535	111	0.94	1	PP4064	No	No	No	57/93	0.61	..
PP3009	PA0651	110	0.94	1	PP0422	No	No	No	44/64	0.68	..
PP3938	PA4919	110	0.95	1	PP4868	No	No	No	60/94	0.63	..
PP2993	PA1416	110	0.96	1	PP5154	No	No	No	72/124	0.58	..
PP0650	PA5266	110	0.96	1	PP2614	No	No	No	36/46	0.78	..
PP2063	PA4171	109	0.93	1	PP2725	No	No	No	55/86	0.63	..
PP3675	PA2793	108	0.97	1	PP3220	No	No	No	48/75	0.64	..
PP5287	PA5045	108	0.98	1	PP5084	No	No	No	66/111	0.59	..
PP5349	PA3198	107	0.98	1	PP4498	No	No	No	49/76	0.64	..
PP3991	PA5504	107	0.97	1	PP0113	No	No	No	43/61	0.7	..
PP4417	PA2303	107	0.98	1	PP4222	No	No	No	55/85	0.64	..
PP1973	PA0335	107	0.97	1	PP5147	No	No	No	35/46	0.76	..
PP0193	PA4926	106	0.99	1	PP4224	No	No	No	42/65	0.64	..
PP2321	PA0614	105	0.97	1	PP3040	No	No	No	37/54	0.68	..
PP3035	PA3910	105	0.996	1	PP4772	No	No	No	31/42	0.73	..
PP2571	PA3463	105	0.83	1	PP1747	No	No	No	49/78	0.62	..
PP1175	PA5070	103	0.997	1	PP5018	No	No	No	57/95	0.6	..
PP4087	PA2621	103	0.88	1	PP4009	No	No	No	35/50	0.7	..
PP1809	PA3255	103	0.995	1	PP1721	No	No	No	37/53	0.69	..
PP0780	PA2486	102	0.94	1	PP1873	No	No	No	34/48	0.7	..
PP0023	PA1173	101	0.997	1	PP2337	No	No	No	45/70	0.64	..
PP3351	PA5345	100	0.99992	1	PP5310	No	No	No	34/44	0.77	..
PP1848	PA4217	100	0.9999	1	PP3596	No	No	No	48/77	0.62	..
PP4883	PA1256	100	0.9996	1	PP5022	No	No	No	38/56	0.67	..
PP4416	PA2762	100	0.994	1	PP4665	No	No	No	36/53	0.67	..
PP2410	PA2520	7189	0	1	PP2410	Yes	No	No	2305/3206	0.71	..
PP3456	PA2018	6352	9.1e-284	1	PP3456	Yes	No	No	2198/3176	0.69	..
PP4063	PA2557	5113	1.5e-227	1	PP4063	Yes	No	No	1351/1697	0.79	..
PP4220	PA2402	4861	9.2e-261	2	PP4220	Yes	No	No	3105/5123	0.6	..
PP2249	PA4310	4555	2.2e-202	1	PP2249	Yes	No	No	1385/1904	0.72	..
PP0884	PA4496	4451	1.3e-197	1	PP0884	Yes	No	No	1221/1588	0.76	..
PP2585	PA2217	4344	8.9e-193	1	PP2585	Yes	No	No	1208/1575	0.76	..
PP0452	PA4277	4306	6.1e-191	1	PP0452	Yes	No	No	1014/1196	0.84	..
PP4658	PA5072	2690	3.7e-118	1	PP4658	Yes	No	No	1270/1954	0.64	..
PP3095	PA0090	2638	5.9e-116	1	PP3095	Yes	No	No	1496/2405	0.62	..
PP2605	PA2243	2533	5.1e-111	1	PP2605	Yes	No	No	1111/1706	0.65	..
PP5259	PA4914	2036	2.6e-88	1	PP5259	Yes	No	No	640/892	0.71	..
PP3940	PA4126	2004	5.3e-87	1	PP3940	Yes	No	No	848/1320	0.64	..
PP5255	PA1202	1930	2.5e-83	1	PP5255	Yes	No	No	482/599	0.8	..
PP2367	PA4355	1822	9.8e-79	1	PP2367	Yes	No	No	768/1184	0.64	..
PP2614	PA0262	1793	7.6e-78	1	PP2614	Yes	No	No	875/1396	0.62	..
PP2617	PA0079	1631	3.6e-70	1	PP2617	Yes	No	No	851/1366	0.62	..
PP3173	PA2932	1607	5.3e-69	1	PP3173	Yes	No	No	697/1093	0.63	..
PP0779	PA1423	1531	1.3e-65	1	PP0779	Yes	No	No	771/1256	0.61	..
PP2542	PA5283	1475	3.9e-63	1	PP2542	Yes	No	No	775/1264	0.61	..
PP3364	PA4117	1420	9.3e-61	1	PP3364	Yes	No	No	966/1619	0.59	..
PP4200	PA2902	1333	1.6e-56	1	PP4200	Yes	No	No	545/815	0.66	..
PP5062	PA5374	1310	2.6e-55	1	PP5062	Yes	No	No	338/430	0.78	..
PP2703	PA0703	1214	2.5e-51	1	PP2703	Yes	No	No	762/1267	0.6	..
PP1090	PA0034	1181	1.6e-49	1	PP1090	Yes	No	No	421/631	0.66	..
PP3622	PA2378	1108	1.8e-43	1	PP3622	Yes	No	No	1152/2048	0.56	..
PP0272	PA2398	1095	4.5e-67	2	PP0272	Yes	No	No	757/1293	0.58	..
PP2431	PA3565	1088	1.8e-45	1	PP2431	Yes	No	No	456/700	0.65	..
PP2354	PA1243	1063	5.1e-41	1	PP2354	Yes	No	No	1073/1883	0.56	..
PP2203	PA4714	1050	1.9e-43	1	PP2203	Yes	No	No	312/420	0.74	..
PP4775	PA3964	1028	1.1e-42	1	PP4775	Yes	No	No	414/643	0.64	..
PP3218	PA4155	956	1.1e-39	1	PP3218	Yes	No	No	740/1276	0.57	..
PP3577	PA1912	943	1.1e-38	1	PP3577	Yes	No	No	351/521	0.67	..
[truncated: 3,350 more rows]

## Sheet: 3 acetatemutants
Table 3: Acetate mutants
Gene Knocked Out:	In updated P. putida model?	Growth ratio (in silico):	Growth prediction with iJP815:	Comparison:
PP0083	Yes	0	no	no change
PP0184	Yes	8.36584e-28	no	no change
PP0289	Yes	0	no	no change
PP0290	Yes	0	no	no change
PP0292	Yes	0	no	no change
PP0293	Yes	0	no	no change
PP0417	Yes	0	no	no change
PP0787	Yes	4.30384e-11	no	no change
PP0817	No	NA	NA	N/A
PP0897	Yes	1	yes	no change
PP0965	Yes	0	no	no change
PP0966	Yes	0	no	no change
PP0967	Yes	0	no	no change
PP1025	Yes	2.78424e-13	no	no change
PP1037	Yes	4.24727e-13	no	no change
PP1086	Yes	1.68782e-28	yes	prediction improved
PP1088	Yes	8.36584e-28	no	no change
PP1470	Yes	4.21576e-13	yes	prediction improved
PP1471	Yes	1	yes	no change
PP1612	Yes	9.77184e-14	no	no change
PP1665	Yes	4.24727e-13	no	no change
PP1768	Yes	0.963408	yes	no change
PP1815	Yes	1.68782e-28	no	no change
PP2000	Yes	2.47305e-13	no	no change
PP2001	Yes	0.999525	NA	N/A
PP2371	Yes	1.28705e-27	no	no change
PP4188	Yes	1	yes	no change
PP4189	Yes	1	yes	no change
PP4191	Yes	0	no	no change
PP4192	Yes	0	no	no change
PP4193	Yes	0	no	no change
PP4194	Yes	0	no	no change
PP4354	No	NA	NA	N/A
PP4678	Yes	2.97888e-13	no	no change
PP4679	Yes	2.97888e-13	yes	prediction improved
PP4680	Yes	1	yes	no change
PP4693	No	NA	NA	N/A
PP4699	Yes	2.77074e-10	no	no change
PP4700	Yes	2.77074e-10	no	no change
PP4715	Yes	3.33498e-13	no	no change
PP4723	Yes	1.7357e-24	no	no change
PP4724	Yes	1.7357e-24	no	no change
PP4725	Yes	0	no	no change
PP4782	Yes	1	yes	no change
PP4800	No	NA	NA	N/A
PP4801	No	NA	NA	N/A
PP4823	Yes	2.47305e-13	no	no change
PP4890	No	NA	NA	N/A
PP4909	Yes	0.963408	yes	no change
PP4976	No	NA	NA	N/A
PP4998	Yes	1.68782e-28	no	no change
PP5097	Yes	1.80187e-26	no	no change
PP5128	Yes	2.97888e-13	no	no change
PP5155	Yes	0.963408	yes	no change
PP5185	Yes	1	yes	no change
PP5289	Yes	3.40382e-23	no	no change
PP5291	Yes	1.68782e-28	no	no change
PP5335	Yes	4.24727e-13	no	no change
PP5336	Yes	4.24727e-13	no	no change

## Sheet: 4 initialstats
Table 4: initial statistics of models and organisms
Preliminary (pre-reconciliation) analysis:
		total # rxns in model:	# shared rxns:	# functionally equivalent rxns:	# totally unique rxns:
iMO1056		883	432	156	295
iJP815		877		121	324
		total # genes in organism:	# reciprocal genes:	# genes with some non-reciprocal homolog:	# genes with no equivalent:
P. aeruginosa		5669	3207	1965	175
P. putida		5347		2362	100

## Sheet: 5 reconciliation notes
Table 5: reconciliation notes
						y = yes													(see Text S1, Table 5.b ('Key to reconcil. changes') for code to categories)
						ng = yes, but no gene associated
						n = no
						Rxn Participation:					Gene associations in original models:		Gene associations in reconciled models:						Change classification
	Unique ToBiN code:	Reaction name:	Reaction Stoichiometry:	Model reconciliation notes (including post-reconciliation notes):		iJP815	iMO1056	iJP962	iMO1086		iJP815	iMO1056	iJP962	iMO1086	Arbitrary annotation?	First Pathway:		Reconciliation category:	iJP815	iMO1056	iJP962	iMO1086
1	RR02311	(2-Aminoethyl)phosphonate:pyruvateaminotransferase	'Pyruvate + (2-Aminoethyl)phosphonate <=> Phosphonoacetaldehyde + L-Alanine '	G-->R association identical in iMO1056 and iJP829.		y	y	y	y		PP2209	PA1310	PP2209	PA1310	n	Phosphonate and phosphinate metabolism		G-->R association identical in PAO and PPU	15	15	15	15
2	RR02341	(2S,3S)-3-Hydroxy-2-methylbutanoyl-CoA:NAD+ oxidoreductase	'(2S,3S)-3-Hydroxy-2-methylbutanoyl-CoA + NAD+ <=> H+ + 2-Methylacetoacetyl-CoA + NADH '	Keep 3-hydroxyacyl-coa dehydrogenase in iMO and iJP. Associate (PP2136 or PP2047 or PP0302 or PP2214) and (PA3014 or PA5188 or PA5386 or PA2554). This is somewhat arbitrary, since there are other possible isozymes in both organisms, but this is not well defined.		y	y	y	y		( PP2136 ) or ( PP2047 ) or ( PP0302 ) or ( PP2214 )	PA1609	(PP2136 or PP2047 or PP0302 or PP2214)	(PA3014 or PA5188 or PA5386 or PA2554)	y	Valine, leucine and isoleucine degradation		beta oxidation pathway	15	14	15	14
3	IR09641	(3R)-3-Hydroxybutanoyl-[acyl-carrier protein]:NADP+ oxidoreductase	'Acetoacetyl-ACP + NADPH + H+ -> NADP+ + (R)-3-Hydroxybutanoyl-[acyl-carrier protein] '	There are 35 PAO genes and 23 PPU genes with putative FabG function in the annotations (including one high confidence FabG in each, PA2967 and PP 1914). Therefore, this is likely a highly redundant function that can't be knocked out. I will thus arbitrarily pick FabG and 2 possible isozymes from each genome for the models: iMO1056r = (PA2967 or PA 4786 or PA1470), iJP829r = (PP1914 or PP0581 or P…		y	y	y	y		( PP1914 ) or ( PP2795 ) or ( PP0581 ) or ( PP2540 ) or ( PP3553 ) or ( PP2783 )	PA2967, PA1827, PA3106, PA4148, PA4786, PA5524, PA4162, PA3106	PP1914 or PP0581 or PP2783	PA2967 or PA4786 or PA1470	n	Fatty acid biosynthesis		fatty acid synthesis	14	14	14	14
4	IR09662	(3R)-3-Hydroxybutanoyl-[acyl-carrier-protein] hydro-lyase	'(R)-3-Hydroxybutanoyl-[acyl-carrier protein] -> But-2-enoyl-[acyl-carrier protein] + H2O '	Keep #9662 in both models, with (PA1610 or PA3645) and (PP4147 or PP1602) associated.		y	y	y	y		( PP2795 ) or ( PP3553 )	PA3645, PA1610	PP4147 or PP1602	PA1610 or PA3645	n	Fatty acid biosynthesis		fatty acid synthesis	14	15	14	15
5	IR09666	(3R)-3-Hydroxydecanoyl-[acyl-carrier-protein] hydro-lyase	'(R)-3-Hydroxydecanoyl-[acyl-carrier protein] -> H2O + trans-Dec-2-enoyl-[acyl-carrier protein] '	Keep #9666 in both models, with (PA1610 or PA3645) and (PP4147 or PP1602) associated.		y	y	y	y		( PP2795 ) or ( PP3553 )	PA1610, PA3645	PP4147 or PP1602	PA1610 or PA3645	n	Fatty acid biosynthesis		fatty acid synthesis	14	15	14	15
6	IR09648	(3R)-3-Hydroxydodecanoyl-[acyl-carrier-protein] hydro-lyase	'(R)-3-Hydroxydodecanoyl-[acyl-carrier protein] -> H2O + trans-Dodec-2-enoyl-[acyl-carrier protein] '	Keep #9648 in both models, with (PA1610 or PA3645) and (PP4147 or PP1602) associated.		y	y	y	y		( PP2795 ) or ( PP3553 )	PA1610, PA3645	PP4147 or PP1602	PA1610 or PA3645	n	Fatty acid biosynthesis		fatty acid synthesis	14	15	14	15
7	IR09629	(3R)-3-Hydroxydodecanoyl-[acyl-carrier-protein]:NADP+ oxidoreductase	'3-Oxododecanoyl-[acyl-carrier protein] + NADPH + H+ -> (R)-3-Hydroxydodecanoyl-[acyl-carrier protein] + NADP+ '	There are 35 PAO genes and 23 PPU genes with putative FabG function in the annotations (including one high confidence FabG in each, PA2967 and PP 1914). Therefore, this is likely a highly redundant function that can't be knocked out. I will thus arbitrarily pick FabG and 2 possible isozymes from each genome for the models: iMO1056r = (PA2967 or PA 4786 or PA1470), iJP829r = (PP1914 or PP0581 or P…		y	y	y	y		( PP1914 ) or ( PP2795 ) or ( PP0581 ) or ( PP2540 ) or ( PP3553 ) or ( PP2783 )	PA1827, PA3106, PA4148, PA4786, PA5524, PA4162, PA3106, PA2967	PP1914 or PP0581 or PP2783	PA2967 or PA4786 or PA1470	n	Fatty acid biosynthesis		fatty acid synthesis	14	14	14	14
8	IR09682	(3R)-3-Hydroxyhexadecanoyl-[acyl-carrier-protein] hydro-lyase	'R-3-hydroxy-hexadecanoyl-ACP -> H2O + Hexadecenoyl-ACP (n-C16:1ACP) '	Keep #9682 in both models, with (PA1610 or PA3645) and (PP4147 or PP1602) associated.		y	y	y	y		( PP2795 ) or ( PP3553 )	PA3645, PA1610	PP4147 or PP1602	PA1610 or PA3645	n	Fatty acid biosynthesis		fatty acid synthesis	14	15	14	15
9	IR09681	(3R)-3-Hydroxyhexadecanoyl-[acyl-carrier-protein]:NADP+ oxidoreductase	'3-Oxohexadecanoyl-[acyl-carrier protein] + NADPH + H+ -> R-3-hydroxy-hexadecanoyl-ACP + NADP+ '	There are 35 PAO genes and 23 PPU genes with putative FabG function in the annotations (including one high confidence FabG in each, PA2967 and PP 1914). Therefore, this is likely a highly redundant function that can't be knocked out. I will thus arbitrarily pick FabG and 2 possible isozymes from each genome for the models: iMO1056r = (PA2967 or PA 4786 or PA1470), iJP829r = (PP1914 or PP0581 or P…		y	y	y	y		( PP1914 ) or ( PP2795 ) or ( PP0581 ) or ( PP2540 ) or ( PP3553 ) or ( PP2783 )	PA2967	PP1914 or PP0581 or PP2783	PA2967 or PA4786 or PA1470	n	Fatty acid biosynthesis		fatty acid synthesis	14	14	14	14
10	IR09685	(3R)-3-Hydroxyhexadecanoyl-[acyl-carrier-protein]:NADP+ oxidoreductase	'NADPH + H+ + 3-Oxooctadecanoyl-[acyl-carrier protein] -> NADP+ + R-3-hydroxy-octadecanoyl-ACP '	There are 35 PAO genes and 23 PPU genes with putative FabG function in the annotations (including one high confidence FabG in each, PA2967 and PP 1914). Therefore, this is likely a highly redundant function that can't be knocked out. I will thus arbitrarily pick FabG and 2 possible isozymes from each genome for the models: iMO1056r = (PA2967 or PA 4786 or PA1470), iJP829r = (PP1914 or PP0581 or P…		y	y	y	y		( PP1914 ) or ( PP2795 ) or ( PP0581 ) or ( PP2540 ) or ( PP3553 ) or ( PP2783 )	PA2967	PP1914 or PP0581 or PP2783	PA2967 or PA4786 or PA1470	n	Fatty acid biosynthesis		fatty acid synthesis	14	14	14	14
11	IR09655	(3R)-3-Hydroxyhexanoyl-[acyl-carrier-protein] hydro-lyase	'(R)-3-Hydroxyhexanoyl-[acp] -> H2O + trans-Hex-2-enoyl-[acp] '	Keep #9655 in both models, with (PA1610 or PA3645) and (PP4147 or PP1602) associated.		y	y	y	y		( PP2795 ) or ( PP3553 )	PA3645, PA1610	PP4147 or PP1602	PA1610 or PA3645	n	Fatty acid biosynthesis		fatty acid synthesis	14	15	14	15
12	IR09652	(3R)-3-Hydroxyhexanoyl-[acyl-carrier-protein]:NADP+ oxidoreductase	'NADPH + 3-Oxohexanoyl-[acyl-carrier protein] + H+ -> (R)-3-Hydroxyhexanoyl-[acp] + NADP+ '	There are 35 PAO genes and 23 PPU genes with putative FabG function in the annotations (including one high confidence FabG in each, PA2967 and PP 1914). Therefore, this is likely a highly redundant function that can't be knocked out. I will thus arbitrarily pick FabG and 2 possible isozymes from each genome for the models: iMO1056r = (PA2967 or PA 4786 or PA1470), iJP829r = (PP1914 or PP0581 or P…		y	y	y	y		( PP1914 ) or ( PP2795 ) or ( PP0581 ) or ( PP2540 ) or ( PP3553 ) or ( PP2783 )	PA1827, PA3106, PA4148, PA4786, PA5524, PA4162, PA3106, PA2967	PP1914 or PP0581 or PP2783	PA2967 or PA4786 or PA1470	n	Fatty acid biosynthesis		fatty acid synthesis	14	14	14	14
13	IR09651	(3R)-3-Hydroxymyristoyl-[acyl-carrier-protein] hydro-lyase	'R-3-hydroxy-myristoyl-ACP -> H2O + Tetradecenoyl-ACP (n-C14:1ACP) '	Keep #9651 in both models, with (PA1610 or PA3645) and (PP4147 or PP1602) associated.		y	y	y	y		( PP2795 ) or ( PP3553 )	PA1610, PA3645	PP4147 or PP1602	PA1610 or PA3645	n	Fatty acid biosynthesis		fatty acid synthesis	14	15	14	15
14	IR09659	(3R)-3-Hydroxyoctanoyl-[acyl-carrier-protein] hydro-lyase	'(R)-3-Hydroxyoctanoyl-[acyl-carrier protein] -> H2O + trans-Oct-2-enoyl-[acp] '	Keep #9659 in both models, with (PA1610 or PA3645) and (PP4147 or PP1602) associated.		y	y	y	y		( PP2795 ) or ( PP3553 )	PA3645, PA1610	PP4147 or PP1602	PA1610 or PA3645	n	Fatty acid biosynthesis		fatty acid synthesis	14	15	14	15
15	IR09633	(3R)-3-Hydroxyoctanoyl-[acyl-carrier-protein]:NADP+ oxidoreductase	'3-Oxooctanoyl-[acyl-carrier protein] + NADPH + H+ -> NADP+ + (R)-3-Hydroxyoctanoyl-[acyl-carrier protein] '	There are 35 PAO genes and 23 PPU genes with putative FabG function in the annotations (including one high confidence FabG in each, PA2967 and PP 1914). Therefore, this is likely a highly redundant function that can't be knocked out. I will thus arbitrarily pick FabG and 2 possible isozymes from each genome for the models: iMO1056r = (PA2967 or PA 4786 or PA1470), iJP829r = (PP1914 or PP0581 or P…		y	y	y	y		( PP1914 ) or ( PP2795 ) or ( PP0581 ) or ( PP2540 ) or ( PP3553 ) or ( PP2783 )	PA1827, PA3106, PA4148, PA4786, PA5524, PA4162, PA3106, PA2967	PP1914 or PP0581 or PP2783	PA2967 or PA4786 or PA1470	n	Fatty acid biosynthesis		fatty acid synthesis	14	14	14	14
16	IR09653	(3R)-3-Hydroxytetradecanoyl-[acyl-carrier-protein]:NADP+ oxidoreductase	'3-Oxotetradecanoyl-[acyl-carrier protein] + NADPH + H+ -> R-3-hydroxy-myristoyl-ACP + NADP+ '	There are 35 PAO genes and 23 PPU genes with putative FabG function in the annotations (including one high confidence FabG in each, PA2967 and PP 1914). Therefore, this is likely a highly redundant function that can't be knocked out. I will thus arbitrarily pick FabG and 2 possible isozymes from each genome for the models: iMO1056r = (PA2967 or PA 4786 or PA1470), iJP829r = (PP1914 or PP0581 or P…		y	y	y	y		( PP1914 ) or ( PP2795 ) or ( PP0581 ) or ( PP2540 ) or ( PP3553 ) or ( PP2783 )	PA2967	PP1914 or PP0581 or PP2783	PA2967 or PA4786 or PA1470	n	Fatty acid biosynthesis		fatty acid synthesis	14	14	14	14
17	IR02475	(R)-2,3-Dihydroxy-3-methylbutanoate hydro-lyase	'(R)-2,3-Dihydroxy-3-methylbutanoate -> H2O + 3-Methyl-2-oxobutanoate '	G-->R association identical in iMO1056 and iJP829.		y	y	y	y		PP5128	PA0353	PP5128	PA0353	n	Valine, leucine and isoleucine biosynthesis		G-->R association identical in PAO and PPU	15	15	15	15
18	RR00833	(R)-3-Hydroxybutanoate:NAD+ oxidoreductase	'(R)-3-Hydroxybutanoate + NAD+ <=> Acetoacetate + H+ + NADH '	G-->R association identical in iMO1056 and iJP829.		y	y	y	y		PP3073	PA2003	PP3073	PA2003	n	Synthesis and degradation of ketone bodies		G-->R association identical in PAO and PPU	15	15	15	15
19	RR00405	(R)-Lactate:NAD+ oxidoreductase	'(R)-Lactate + NAD+ <=> Pyruvate + H+ + NADH '	G-->R association identical in iMO1056 and iJP829.		y	y	y	y		PP1649	PA0927	PP1649	PA0927	n	Pyruvate metabolism		G-->R association identical in PAO and PPU	15	15	15	15
20	IR01409	(R)-Pantoate:beta-alanine ligase (AMP-forming)	'beta-Alanine + ATP + (R)-Pantoate -> Pyrophosphate + AMP + H+ + Pantothenate '	G-->R association identical in iMO1056 and iJP829.		y	y	y	y		PP4700	PA4730	PP4700	PA4730	n	beta-Alanine metabolism		G-->R association identical in PAO and PPU	15	15	15	15
21	IR00832	(S)-3-Hydroxy-3-methylglutaryl-CoA acetoacetate-lyase	'(S)-3-Hydroxy-3-methylglutaryl-CoA -> Acetyl-CoA + Acetoacetate '	G-->R association identical in iMO1056 and iJP829.		y	y	y	y		PP3540	PA2011	PP3540	PA2011	n	Synthesis and degradation of ketone bodies		G-->R association identical in PAO and PPU	15	15	15	15
22	IR05641	(S)-4-Amino-5-oxopentanoate 4,5-aminomutase (R)	'(S)-4-Amino-5-oxopentanoate -> 5-Aminolevulinate '	The two additional isoenzymes PA5523 and PA4088, do not have reciprocals in PPU, but the evidence that they catalyze this reaction is not strong, they are similar, bt not so strongly to PP4784 and only KEGG claims that they catalyze this reaction. I would remove them.		y	y	y	y		PP4784	PA5523, PA4088, PA3977	PP4784	PA3977	n	Porphyrin and chlorophyll metabolism		1modelnotreciprocal	15	14	15	14
23	RR01103	(S)-Dihydroorotate amidohydrolase	'H2O + (S)-Dihydroorotate <=> N-Carbamoyl-L-aspartate + H+ '	PP4999 <--> PA0401 with 80% homology. Keep as is: PA0401 is a non-catalytic relative of PP4999, as stated in the PSEUDOCAP annotation. /modification/ (5/26/2010) PP4999 removed from the GPR (reciprocal-check)		y	y	y	y		( PP1086 ) or ( PP4999 )	PA3527	PP1086	PA3527	n	Pyrimidine metabolism		bothmodels_diffnum	14	15	14	15
24	RR00703	(S)-Malate hydro-lyase	'(S)-Malate <=> H2O + Fumarate '	G-->R association identical in iMO1056 and iJP829.		y	y	y	y		( PP1755 ) or ( PP0897 ) or ( PP0944 )	PA0854, PA4333, PA4470	(PP1755) or (PP0897) or (PP0944)	PA0854 or PA4333 or PA4470	n	Citrate cycle (TCA cycle)		G-->R association identical in PAO and PPU	15	15	15	15
25	RR00179	(S)-Malate:NAD+ oxidoreductase	'(S)-Malate + NAD+ <=> Oxaloacetate + H+ + NADH '	PP0654 --> PA1901 <--> PP1866 with 55% and 83% homology, respectively. Keep the same. There are 2 isozymes for MDH in PPU, only 1 in PAO. Strangely, however, the 2 isozymes in PPU have no similarity to each other. Their activity is from the PPU annotation in PSEUDOCAP.		y	y	y	y		( PP3591 ) or ( PP0654 )	PA1252	(PP3591) or (PP0654)	PA1252	n	Citrate cycle (TCA cycle)		bothmodels_diffnum	15	15	15	15
26	IR02023	1-(2-Carboxyphenylamino)-1-deoxy-D-ribulose-5-phosphatecarboxy-lyase(cyclizing)	'1-(2-Carboxyphenylamino)-1''-deoxy-D-ribulose 5''-phosphate + H+ -> H2O + Indoleglycerol phosphate + CO2 '	G-->R association identical in iMO1056 and iJP829.		y	y	y	y		PP0422	PA0651	PP0422	PA0651	n	Phenylalanine, tyrosine and tryptophan biosynthesis		G-->R association identical in PAO and PPU	15	15	15	15
27	RR02346	1-(5-Phospho-D-ribosyl)-5-amino-4-imidazolecarboxylate carboxy-lyase	'H+ + 1-(5-Phospho-D-ribosyl)-5-amino-4-imidazolecarboxylate <=> Aminoimidazole ribotide + CO2 '	G-->R association identical in iMO1056 and iJP829.		y	y	y	y		( PP5335 and PP5336 )	PA5426, PA5425	(PP5335 and PP5336)	PA5426 or PA5425	n	Purine metabolism		G-->R association identical in PAO and PPU	15	15	15	15
28	RR02499	1-(5'-Phosphoribosyl)-5-amino-4-(N-succinocarboxamide)-imidazoleAMP-lyase	'1-(5''-Phosphoribosyl)-5-amino-4-(N-succinocarboxamide)-imidazole <=> 1-(5''-Phosphoribosyl)-5-amino-4-imidazolecarboxamide + Fumarate '	iMO1056r gene association for #2499/6876 (ADSL2r) should be (PA3517 or PA3516 or PA2629) (all encode PurB), iJP829 gene association should stay as PP4016. This is a real difference. This reaction is catalyzed by the same genes that catalyze ADSL1r, as shown in EXPASY under EC 4.3.2.2.		y	y	y	y		PP4016	PA2629	PP4016	PA2629 or PA3516 or PA3517	n	Purine metabolism		bothmodels_diffnum	15	14	15	14
29	RR02510	1-(5-Phosphoribosyl)-5-amino-4-carboxyimidazole:L-aspartate ligase(ADP-forming)	'L-Aspartate + ATP + 1-(5-Phospho-D-ribosyl)-5-amino-4-imidazolecarboxylate <=> 1-(5''-Phosphoribosyl)-5-amino-4-(N-succinocarboxamide)-imidazole + ADP + Orthophosphate + H+ '	G-->R association identical in iMO1056 and iJP829.		y	y	y	y		PP1240	PA1013	PP1240	PA1013	n	Purine metabolism		G-->R association identical in PAO and PPU	15	15	15	15
30	IR06875	1-(5'-Phosphoribosyl)-5-amino-4-imidazolecarboxamide +L-Glutamate + D-erythro-1-(Imidazol-4-yl)glycerol 3-phosphate <=> N-(5'-Phospho-D-1'-ribulosylformimino)-5-amino-1-(5''-phospho-D-ribosyl)-4-imidazolecarboxamide + L-Glutamine (R)	'N-(5''-Phospho-D-1''-ribulosylformimino)-5-amino-1-(5''''-phospho-D-ribosyl)-4-imidazolecarboxamide + L-Glutamine -> L-Glutamate + 1-(5''-Phosphoribosyl)-5-amino-4-imidazolecarboxamide + H+ + D-erythro-1-(Imidazol-4-yl)glycerol 3-phosphate '	Add PA510 and PA3151 to the GPR of iMO. It probably should sound "PA3151 and PA3152 or PA5240 and PA5242" - iferred from the localization of the genes. /modification/ (5/26/2010) Typo in the annotation corected (reciprocal-check)		y	y	y	y		( PP0290 and PP0293 )	PA5142 or PA3152	PP0290 and PP0293	PA3151 and PA3152 or PA5140 and PA5142	n	Histidine metabolism		1modelnotreciprocal	15	14	15	14
31	IR00597	10-Formyltetrahydrofolate amidohydrolase	'10-Formyltetrahydrofolate + H2O -> Tetrahydrofolate + Formate + H+ '	PP1943 --> PA5420 <--> PP0327 with 63% and 80% homology, respectively. Keep as is. This is a real difference, there is no 3rd isozyme in PAO, but there is in PPU (by annotation and blast search).		y	y	y	y		( PP1943 ) or ( PP0327 ) or ( PP1367 )	PA5420, PA4314	(PP1943) or (PP0327) or (PP1367)	PA5420 or PA4314	n	Glyoxylate and dicarboxylate metabolism		bothmodels_diffnum	15	15	15	15
32	RR02500	10-Formyltetrahydrofolate:5'-phosphoribosyl-5-amino-4-imidazolecarboxamide formyltransferase	'10-Formyltetrahydrofolate + 1-(5''-Phosphoribosyl)-5-amino-4-imidazolecarboxamide <=> 1-(5''-Phosphoribosyl)-5-formamido-4-imidazolecarboxamide + Tetrahydrofolate '	G-->R association identical in iMO1056 and iJP829.		y	y	y	y		PP4822	PA4854	PP4822	PA4854	n	Purine metabolism		G-->R association identical in PAO and PPU	15	15	15	15
33	IR03023	1-Deoxy-D-xylulose-5-phosphate pyruvate-lyase (carboxylating)	'D-Glyceraldehyde 3-phosphate + Pyruvate + H+ -> CO2 + 1-Deoxy-D-xylulose 5-phosphate '	G-->R association identical in iMO1056 and iJP829.		y	y	y	y		PP0527	PA4044	PP0527	PA4044	n	Biosynthesis of terpenoids and steroids		G-->R association identical in PAO and PPU	15	15	15	15
34	IR02345	2-(Formamido)-N1-(5-phosphoribosyl)acetamidine cyclo-ligase(ADP-forming)	'ATP + 2-(Formamido)-N1-(5''-phosphoribosyl)acetamidine -> Aminoimidazole ribotide + ADP + Orthophosphate + 2 H+ '	G-->R association identical in iMO1056 and iJP829.		y	y	y	y		PP1665	PA0945	PP1665	PA0945	n	Purine metabolism		G-->R association identical in PAO and PPU	15	15	15	15
35	IR06714	2,3,4,5-Tetrahydrodipicolinate:NADP+ oxidoreductase (R)	'2,3-Dihydrodipicolinate + NADPH + H+ -> 2,3,4,5-Tetrahydrodipicolinate + NADP+ '	G-->R association identical in iMO1056 and iJP829.		y	y	y	y		PP4725	PA4759	PP4725	PA4759	n	Lysine biosynthesis		G-->R association identical in PAO and PPU	15	15	15	15
36	RR02215	2,5-Dihydro-5-oxofuran-2-acetate lyase (decyclizing)	'H+ + 2,5-Dihydro-5-oxofuran-2-acetate <=> cis,cis-Muconate '	G-->R association identical in iMO1056 and iJP829.		y	y	y	y		PP3715	PA2509	PP3715	PA2509	n	Benzoate degradation via hydroxylation		G-->R association identical in PAO and PPU	15	15	15	15
37	IR02020	2-Amino-4-hydroxy-6-(D-erythro-1,2,3-trihydroxypropyl)-7,8-dihydropteridine glycolaldehyde-lyase	'2-Amino-4-hydroxy-6-(D-erythro-1,2,3-trihydroxypropyl)-7,8-dihydropteridine -> Glycolaldehyde + 2-Amino-4-hydroxy-6-hydroxymethyl-7,8-dihydropteridine + H+ '	G-->R association identical in iMO1056 and iJP829.		y	y	y	y		PP0392	PA0582	PP0392	PA0582	n	Folate biosynthesis		G-->R association identical in PAO and PPU	15	15	15	15
38	IR02389	2-Amino-4-hydroxy-6-(erythro-1,2,3-trihydroxypropyl)dihydropteridine triphosphate lyase	'2-Amino-4-hydroxy-6-(erythro-1,2,3-trihydroxypropyl)dihydropteridine triphosphate -> 6-Pyruvoyltetrahydropterin + Inorganic triphosphate + H+ '	G-->R association identical in iMO1056 and iJP829.		y	y	y	y		PP2341	PA2666	PP2341	PA2666	n	Folate biosynthesis		G-->R association identical in PAO and PPU	15	15	15	15
39	IR01735	2-Amino-4-hydroxy-6-hydroxymethyl-7,8-dihydropteridine-diphosphate:4-aminobenzoate2-amino-4-hydroxydihydropteridine-6-methenyltransferase	'2-Amino-7,8-dihydro-4-hydroxy-6-(diphosphooxymethyl)pteridine + 4-Aminobenzoate -> Pyrophosphate + Dihydropteroate '	G-->R association identical in iMO1056 and iJP829.		y	y	y	y		PP4717	PA4750	PP4717	PA4750	n	Folate biosynthesis		G-->R association identical in PAO and PPU	15	15	15	15
40	RR01898	2-Carboxy-2,5-dihydro-5-oxofuran-2-acetate lyase (decyclizing)	'2-Carboxy-2,5-dihydro-5-oxofuran-2-acetate <=> 3-Carboxy-cis,cis-muconate + H+ '	G-->R association identical in iMO1056 and iJP829.		y	y	y	y		PP1379	PA0230	PP1379	PA0230	n	Benzoate degradation via hydroxylation		G-->R association identical in PAO and PPU	15	15	15	15
41	IR01746	2-Dehydro-3-deoxy-D-arabino-heptonate 7-phosphate phosphate-lyase(cyclyzing)	'2-Dehydro-3-deoxy-D-arabino-heptonate 7-phosphate -> 3-Dehydroquinate + Orthophosphate '	G-->R association identical in iMO1056 and iJP829.		y	y	y	y		PP5078	PA5038	PP5078	PA5038	n	Phenylalanine, tyrosine and tryptophan biosynthesis		G-->R association identical in PAO and PPU	15	15	15	15
42	IR06237	2-Dehydro-3-deoxy-D-octonate-8-phosphateD-arabinose-5-phosphate-lyase (pyruvate-phosphorylating) (R)	'D-Arabinose 5-phosphate + H2O + Phosphoenolpyruvate -> Orthophosphate + 3-Deoxy-D-manno-octulosonate 8-phosphate '	PP1807 --> PA3636 <--> PP1611 with 70% and 84% homology, respectively. Keep as is. PPU has 2 isozymes for this reaction, PAO only has 1. Confirmed by BLAST search in PAO1 genome.		y	y	y	y		( PP1611 ) or ( PP1807 )	PA3636	(PP1611) or (PP1807)	PA3636	n	Lipopolysaccharide biosynthesis		bothmodels_diffnum	15	15	15	15
43	IR00909	2'-Deoxycytidine 5'-monophosphate phosphohydrolase	'H2O + dCMP -> Deoxycytidine + Orthophosphate '	Keep as is. There are no matches in PAO1 to PP1414 and PP2531 (5' nucleotidases) from BLAST search in PSEUDOCAP, and the matches in our own BLAST search (PA3589 and PA3919) have unrelated annotations. Strangely, PP1414 and PP2531 have no homology for each other. Note, many enzymes for these reactions have broad specificity, so there might be other enzymes that can act as isozymes.		y	y	y	y		( PP1414 ) or ( PP1620 ) or ( PP2531 )	PA3625	(PP1414) or (PP1620) or (PP2531)	PA3625	n	Pyrimidine metabolism		bothmodels_diffnum	15	15	15	15
44	IR03809	2'-Deoxyguanosine 5'-monophosphate phosphohydrolase	'H2O + dGMP -> Orthophosphate + Deoxyguanosine '	Keep as is. There are no matches in PAO1 to PP1414 and PP2531 (5' nucleotidases) from BLAST search in PSEUDOCAP, and the matches in our own BLAST search (PA3589 and PA3919) have unrelated annotations. Strangely, PP1414 and PP2531 have no homology for each other. Note, many enzymes for these reactions have broad specificity, so there might be other enzymes that can act as isozymes.		y	y	y	y		( PP1414 ) or ( PP1620 ) or ( PP2531 )	PA3625	(PP1414) or (PP1620) or (PP2531)	PA3625	n	Purine metabolism		bothmodels_diffnum	15	15	15	15
45	RR02222	2-Isopropylmalate hydro-lyase	'2-Isopropylmalate <=> H2O + 2-Isopropylmaleate '	G-->R association identical in iMO1056 and iJP829.		y	y	y	y		( PP1986 and PP1985 )	PA3120, PA3121	(PP1986 and PP1985)	PA3120 or PA3121	n	Valine, leucine and isoleucine biosynthesis		G-->R association identical in PAO and PPU	15	15	15	15
46	IR09309	2-Keto-gluconate-6-phosphate hydrogenase	'NADPH + 6-Phospho-2-dehydro-D-gluconate + H+ -> 6-Phospho-D-gluconate + NADP+ '	PP1261 <--> PA3896 with 74% homology. Remove PP1261 from iJP829, it doesn't have sufficient evidence for being linked with #9309 (phosphogluconate 2-dehydrogenase = 2-keto-gluconate-6-phosphate hydrogenase).		y	y	y	y		( PP3376 ) or ( PP1261 )	PA2263	PP3376	PA2263	n	Glutathione metabolism		bothmodels_diffnum	14	15	14	15
47	IR09308	2-keto-gluconokinase	'2-Dehydro-D-gluconate + ATP -> ADP + 6-Phospho-2-dehydro-D-gluconate + H+ '	G-->R association identical in iMO1056 and iJP829.		y	y	y	y		PP3378	PA2261	PP3378	PA2261	n	Pentose phosphate pathway		G-->R association identical in PAO and PPU	15	15	15	15
48	IR01834	2-Methyl-4-amino-5-hydroxymethylpyrimidine-diphosphate:4-methyl-5-(2-phosphoethyl)-thiazole2-methyl-4-aminopyridine-5-methenyltransferase	'4-Methyl-5-(2-phosphoethyl)-thiazole + H+ + 2-Methyl-4-amino-5-hydroxymethylpyrimidine diphosphate -> Pyrophosphate + Thiamin monophosphate '	G-->R association identical in iMO1056 and iJP829.		y	y	y	y		( PP4783 ) or ( PP1348 )	PA4400, PA3976	(PP4783) or (PP1348)	PA4400 or PA3976	n	Thiamine metabolism		G-->R association identical in PAO and PPU	15	15	15	15
49	IR08933	2-Octaprenyl-3-methyl-6-methoxy-1,4-benzoquinol hydroxylase	'Oxygen + 2 2-Octaprenyl-3-methyl-6-methoxy-1,4-benzoquinone -> 2 2-Octaprenyl-3-methyl-5-hydroxy-6-methoxy-1,4-benzoquinol '	G-->R association identical in iMO1056 and iJP829.		y	y	y	y		PP5197	PA5221	PP5197	PA5221	n	Ubiquinone and other terpenoid-quinone biosynthesis		G-->R association identical in PAO and PPU	15	15	15	15
50	IR02605	2-Octaprenyl-6-hydroxyphenol + S-Adenosyl-L-methionine <=>2-Octaprenyl-6-methoxyphenol + S-Adenosyl-L-homocysteine	'2-Octaprenyl-6-hydroxyphenol + S-Adenosyl-L-methionine -> 2-Octaprenyl-6-methoxyphenol + H+ + S-Adenosyl-L-homocysteine '	G-->R association identical in iMO1056 and iJP829.		y	y	y	y		PP1765	PA3171	PP1765	PA3171	n	Ubiquinone and other terpenoid-quinone biosynthesis		G-->R association identical in PAO and PPU	15	15	15	15
51	IR02606	2-octaprenyl-6-methoxyphenol hydroxylase	'Oxygen + NADPH + 2-Octaprenyl-6-methoxyphenol + H+ -> H2O + NADP+ + 2-Octaprenyl-6-methoxy-1,4-benzoquinone '	G-->R association identical in iMO1056 and iJP829.		y	y	y	y		PP5199	PA5223	PP5199	PA5223	n	Ubiquinone and other terpenoid-quinone biosynthesis		G-->R association identical in PAO and PPU	15	15	15	15
52	RR02374	2-Oxo-2,5-dihydrofuran-5-acetate delta3-delat2-isomerase	'2,5-Dihydro-5-oxofuran-2-acetate <=> 2-Oxo-2,3-dihydrofuran-5-acetate '	G-->R association identical in iMO1056 and iJP829.		y	y	y	y		PP3714	PA2508	PP3714	PA2508	n	Benzoate degradation via hydroxylation		G-->R association identical in PAO and PPU	15	15	15	15
53	IR03024	2-Phospho-4-(cytidine 5'-diphospho)-2-C-methyl-D-erythritolCMP-lyase (cyclizing)	'2-Phospho-4-(cytidine 5''-diphospho)-2-C-methyl-D-erythritol -> 2-C-Methyl-D-erythritol 2,4-cyclodiphosphate + CMP '	G-->R association identical in iMO1056 and iJP829.		y	y	y	y		PP1618	PA3627	PP1618	PA3627	n	Biosynthesis of terpenoids and steroids		G-->R association identical in PAO and PPU	15	15	15	15
54	RR00362	2-Phospho-D-glucerate hydro-lyase	'2-Phospho-D-glycerate <=> H2O + Phosphoenolpyruvate '	G-->R association identical in iMO1056 and iJP829.		y	y	y	y		PP1612	PA3635	PP1612	PA3635	n	Glycolysis / Gluconeogenesis		G-->R association identical in PAO and PPU	15	15	15	15
55	RR03681	2-Phospho-D-glycerate 2,3-phosphomutase	'2-Phospho-D-glycerate <=> 3-Phospho-D-glycerate '	Remove PP177, PP3578, PP5288 from the GPR of the reaction in iJP. They are phosphoGLUCOmoutases PA5131<==>PP5056. /modification/ (10/19/2009) This reaction should be present there was some mistake. (5/26/2010) Corrected PP5065 to PP5056 (reciprocal-check)		y	y	y	y		( PP1777 ) or ( PP3578 ) or ( PP5056 ) or ( PP5288 )	PA5131	PP5056	PA5131	n	Glycolysis / Gluconeogenesis		1modelnotreciprocal	14	15	14	15
56	IR00824	2-Phosphoglycolate phosphohydrolase	'2-Phosphoglycolate + H2O -> Glycolate + Orthophosphate '	Set the GPRs of the reaction to be "PP0416 or PP1764" and "PA0608 or PA3172" for iJP and iMO, respectively. The annotation of the remaining genes is too general to assign them to this function. PP0416<==>PA0608, PP1764<==>pa3172		y	y	y	y		( PP0094 ) or ( PP0416 ) or ( PP1764 ) or ( PP1907 )	PA0608, PA3941, PA3172	PP0416 or PP1764	PA0608 or PA3172	n	Glyoxylate and dicarboxylate metabolism		1modelnotreciprocal	14	14	14	14
57	IR09375	3,4 Dihydroxy-2-butanone-4-phosphate synthase	'D-Ribose 5-phosphate -> 3,4-dihydroxy-2-butanone 4-phosphate + Formate + H+ '	Add PP0516 and PP3813 as two additional isozymes to he GPR of the reaction in iJP. PA4054 <==> PA0516. /modification/ changed		y	y	y	y		PP0530	PA4054	PP0516 or PP3813 or PP0530	PA4054	n	Riboflavin metabolism		1modelnotreciprocal	14	15	14	15
58	IR05143	3-Carboxy-3-hydroxy-4-methylpentanoate3-methyl-2-oxobutanoate-lyase (CoA-acetylating) (R)	'H2O + Acetyl-CoA + 3-Methyl-2-oxobutanoate -> 2-Isopropylmalate + H+ + CoA '	Keep as is. Seems to be a real difference. PA3792 <--> PP1025, and PA1217 is most closely related in PPU to PP4493 (by nucleotide BLAST) and to PA2011 (by protein BLAST), neither of which have the 2-isopropylmalate synthase function.		y	y	y	y		PP1025	PA3792, PA1217	PP1025	PA3792 or PA1217	n	Valine, leucine and isoleucine biosynthesis		bothmodels_diffnum	15	15	15	15
59	RR01747	3-Dehydroquinate hydro-lyase	'3-Dehydroquinate <=> H2O + 3-Dehydroshikimate '	PP3003 --> PA0245 <--> PP2407 with 65% and 74% homology, respectively. Keep as is. There are 3 isozymes in PPU, and only 2 in PAO for this reaction.		y	y	y	y		( PP2407 ) or ( PP3003 ) or ( PP0560 )	PA0245, PA4846	(PP2407) or (PP3003) or (PP0560)	PA0245 or PA4846	n	Phenylalanine, tyrosine and tryptophan biosynthesis		bothmodels_diffnum	15	15	15	15
60	IR01932	3-Deoxy-D-manno-octulosonate-8-phosphate 8-phosphohydrolase	'H2O + 3-Deoxy-D-manno-octulosonate 8-phosphate -> 3-Deoxy-D-manno-octulosonate + Orthophosphate '	G-->R association identical in iMO1056 and iJP829.		y	y	y	y		PP0956	PA4458	PP0956	PA4458	n	Lipopolysaccharide biosynthesis		G-->R association identical in PAO and PPU	15	15	15	15
61	IR04300	3-Dimethylubiquinonol 3-methyltransferase	'2-Octaprenyl-3-methyl-5-hydroxy-6-methoxy-1,4-benzoquinol + S-Adenosyl-L-methionine -> Ubiquinol-8 + H+ + S-Adenosyl-L-homocysteine '	G-->R association identical in iMO1056 and iJP829.		y	y	y	y		PP1765	PA3171	PP1765	PA3171	n	Ubiquinone and other terpenoid-quinone biosynthesis		G-->R association identical in PAO and PPU	15	15	15	15
62	RR02244	3-Isopropylmalate hydro-lyase	'3-Isopropylmalate <=> H2O + 2-Isopropylmaleate '	G-->R association identical in iMO1056 and iJP829.		y	y	y	y		( PP1986 and PP1985 )	PA3120, PA3121	(PP1986 and PP1985)	PA3120 or PA3121	n	Valine, leucine and isoleucine biosynthesis		G-->R association identical in PAO and PPU	15	15	15	15
63	IR02277	3-Methylbutanoyl-CoA:(acceptor) 2,3-oxidoreductase	'FAD + 3-Methylbutanoyl-CoA -> 3-Methylcrotonyl-CoA + FADH2 '	Add 1.3.99.3/1.3.99.10 (3-Methylbutanoyl-CoA:(acceptor) 2,3-oxidoreductase) to iMO. Associate with (PP2216 or PP2437 or PP1893) and (PA2552 or PA2550 or PA2815). There are more possible isozymes in both organisms, but these are all reciprocal, and many are general function prediction.		y	y	y	y		( PP2437 ) or ( PP2793 ) or ( PP4064 )	PA2015	(PP2216 or PP2437 or PP1893)	(PA2552 or PA2550 or PA2815)	n	Valine, leucine and isoleucine degradation		beta oxidation pathway	15	14	15	14
64	IR02300	3-Methylcrotonoyl-CoA:carbon-dioxide ligase (ADP-forming)	'HCO3 + 3-Methylcrotonyl-CoA + ATP -> ADP + Orthophosphate + 3-Methylglutaconyl-CoA + H+ '	G-->R association identical in iMO1056 and iJP829.		y	y	y	y		( PP4065 and PP4067 )	PA2014, PA2012	(PP4065 and PP4067)	PA2014 or PA2012	n	Valine, leucine and isoleucine degradation		G-->R association identical in PAO and PPU	15	15	15	15
65	IR04164	3-Octaprenyl-4-hydroxybenzoate <=> 2-Octaprenylphenol + CO2	'3-Octaprenyl-4-hydroxybenzoate + H+ -> 2-Octaprenylphenol + CO2 '	Remove PA0254 from and add PA4019 as an isozyme to the GPR of the reaction in iMO. PA0254 has only some kind of similar motif, that to little evidence PP5213<==>PA5237, PP0548<==>PA4019 /modification/ fixed gene associations 10/24/2009		y	y	y	y		( PP5213 ) or ( PP0548 )	PA5237, PA0254	PP5213 or PP0548	PA4019 or PA5237	n	Ubiquinone and other terpenoid-quinone biosynthesis		1modelnotreciprocal	15	14	15	14
66	IR00406	3-Oxopropanoate:NAD+ oxidoreductase (decarboxylating,CoA-acetylating)	'3-Oxopropanoate + CoA + NAD+ -> Acetyl-CoA + CO2 + NADH '	keep gene association as is. PA0747 and PA3570 both map to PP4667. This is a real difference. These genes also catalyze #577. Stoichiometry should be changed to output bicarbonate rather than CO2 (and take an extra H2O as a substrate), based on EXPASY description.		y	y	y	y		( PP0597 ) or ( PP4667 )	PA0130, PA3570, PA0747	(PP0597) or (PP4667)	PA0130 or PA3570 or PA0747	n	Inositol phosphate metabolism		bothmodels_diffnum	15	15	15	15
67	IR06045	4,5-Dihydro-4-oxo-5-imidazolepropanoate hydro-lyase (R)	'Urocanate + H2O -> 4-Imidazolone-5-propanoate '	G-->R association identical in iMO1056 and iJP829.		y	y	y	y		PP5033	PA5100	PP5033	PA5100	n	Histidine metabolism		G-->R association identical in PAO and PPU	15	15	15	15
68	RR03487	4,6-Dideoxy-4-oxo-dTDP-D-glucose <=>dTDP-4-dehydro-6-deoxy-L-mannose	'4,6-Dideoxy-4-oxo-dTDP-D-glucose <=> dTDP-4-dehydro-6-deoxy-L-mannose '	PP0265 --> PA5164 <--> PP1782 with 69% and 69% homology, respectively. Keep as is. BLAST confirms only 1 enzyme exists in PAO, but 2 isozymes exist in PPU.		y	y	y	y		( PP0265 ) or ( PP1782 )	PA5164	(PP0265) or (PP1782)	PA5164	n	Streptomycin biosynthesis		bothmodels_diffnum	15	15	15	15
69	IR02961	4-amino-4-deoxychorismate pyruvate-lyase	'4-amino-4-deoxychorismate -> Pyruvate + 4-Aminobenzoate + H+ '	G-->R association identical in iMO1056 and iJP829.		y	y	y	y		PP1917	PA2964	PP1917	PA2964	n	Folate biosynthesis		G-->R association identical in PAO and PPU	15	15	15	15
70	IR09380	4-amino-5-hydroxymethyl-2-methylpyrimidine synthetase	'2 Aminoimidazole ribotide + 2 H2O -> 2 Glycolaldehyde + Oxygen + 2 Orthophosphate + 2 4-Amino-5-hydroxymethyl-2-methylpyrimidine '	G-->R association identical in iMO1056 and iJP829.		y	y	y	y		PP4922	PA4973	PP4922	PA4973	n	Thiamine metabolism		G-->R association identical in PAO and PPU	15	15	15	15
71	RR02006	4-Carboxymuconolactone carboxy-lyase	'2-Carboxy-2,5-dihydro-5-oxofuran-2-acetate + H+ <=> CO2 + 2-Oxo-2,3-dihydrofuran-5-acetate '	Keep #2006/6383 in both models, with (PA0232 or PA4486) and (PP1381 or PP3648) associated. These genes are not reciprocal pairs, but PA0232 and PP1381 have the 4-carboxymuconolactone decarboxylase function, and PA4486 and PP3648 have similarity to 4-carbox... genes, so i included them.		y	y	y	y		( PP1381 ) or ( PP3648 )	PA0232, PA4486	(PP1381) or (PP3648)	PA0232 or PA4486	n	Benzoate degradation via hydroxylation		amino acid catabolism	15	14	15	14
72	IR05211	4-Fumarylacetoacetate fumarylhydrola (R)	'H2O + 4-Fumarylacetoacetate -> Acetoacetate + Fumarate + H+ '	G-->R association identical in iMO1056 and iJP829.		y	y	y	y		PP4620	PA2008	PP4620	PA2008	n	Tyrosine metabolism		G-->R association identical in PAO and PPU	15	15	15	15
73	IR03632	4-Hydroxybenzoate,NADH:oxygen oxidoreductase (3-hydroxylating)	'Oxygen + NADPH + H+ + 4-Hydroxybenzoate -> 3,4-Dihydroxybenzoate + H2O + NADP+ '	G-->R association identical in iMO1056 and iJP829.		y	y	y	y		PP3537	PA0247	PP3537	PA0247	n	Benzoate degradation via hydroxylation		G-->R association identical in PAO and PPU	15	15	15	15
74	IR01445	4-Hydroxyphenylpyruvate:oxygen oxidoreductase(hydroxylating,decarboxylating)	'Oxygen + 3-(4-Hydroxyphenyl)pyruvate -> CO2 + Homogentisate '	G-->R association identical in iMO1056 and iJP829.		y	y	y	y		( PP2554 ) or ( PP3433 )	PA0242, PA0865	(PP2554) or (PP3433)	PA0242 or PA0865	n	Tyrosine metabolism		G-->R association identical in PAO and PPU	15	15	15	15
75	IR01277	4-Imidazolone-5-propanoate amidohydrolase	'H2O + 4-Imidazolone-5-propanoate -> N-Formimino-L-glutamate '	G-->R association identical in iMO1056 and iJP829.		y	y	y	y		PP5030	PA5092	PP5030	PA5092	n	Histidine metabolism		G-->R association identical in PAO and PPU	15	15	15	15
76	IR01804	4-Maleylacetoacetate cis-trans-isomerase	'4-Maleylacetoacetate -> 4-Fumarylacetoacetate '	remove all but PA2007 and PP4619 from iMO1056r and iJP829r respectively. The other genes were ID'd byTigrfamfun as EC 5.2.1.2, but only PA2007 and PP4619 have their main functional annotation in PSEUDOCAP as maleylacetoacetate isomerase (5.2.1.2), and also they are the only KEGG orthologs for this function. /modification/ (10/21/2009) This reaction should be present in both models there was some …		y	y	y	y		PP4619	PA2473, PA2007, PA1655, PA3035	PP4619	PA2007	n	Tyrosine metabolism		bothmodels_diffnum	15	14	15	14
77	RR02347	4-Phospho-D-erythronate + NAD+ <=>2-Oxo-3-hydroxy-4-phosphobutanoate + NADH	'4-Phospho-D-erythronate + NAD+ <=> 2-Oxo-3-hydroxy-4-phosphobutanoate + H+ + NADH '	G-->R association identical in iMO1056 and iJP829.		y	y	y	y		PP2117	PA1375	PP2117	PA1375	n	Vitamin B6 metabolism		G-->R association identical in PAO and PPU	15	15	15	15
78	IR00776	5,10-Methylenetetrahydrofolate:3-methyl-2-oxobutanoatehydroxymethyltransferase	'H2O + 5,10-Methylenetetrahydrofolate + 3-Methyl-2-oxobutanoate -> Tetrahydrofolate + 2-Dehydropantoate '	G-->R association identical in iMO1056 and iJP829.		y	y	y	y		PP4699	PA4729	PP4699	PA4729	n	Pantothenate and CoA biosynthesis		G-->R association identical in PAO and PPU	15	15	15	15
79	IR01158	5,10-Methylenetetrahydrofolate:dUMP C-methyltransferase	'dUMP + 5,10-Methylenetetrahydrofolate -> Dihydrofolate + dTMP '	G-->R association identical in iMO1056 and iJP829.		y	y	y	y		PP5141	PA0342	PP5141	PA0342	n	Pyrimidine metabolism		G-->R association identical in PAO and PPU	15	15	15	15
80	RR00598	5,10-Methylenetetrahydrofolate:glycine hydroxymethyltransferase	'H2O + Glycine + 5,10-Methylenetetrahydrofolate <=> L-Serine + Tetrahydrofolate '	Keep as is. There appears to be a real difference. There are 3 isozymes in PAO, and 2 in PPU.		y	y	y	y		( PP0671 ) or ( PP0322 )	PA5415, PA2444, PA4602	(PP0671) or (PP0322)	PA5415 or PA2444 or PA4602	n	Glycine, serine and threonine metabolism		amino acid catabolism	15	15	15	15
81	RR00771	5,10-Methylenetetrahydrofolate:NADP+ oxidoreductase	'5,10-Methylenetetrahydrofolate + NADP+ <=> NADPH + 5,10-Methenyltetrahydrofolate + H+ '	PP1945 --> PA4290 <--> PP2111 with 58% and 78% homology, respectively. Keep as is. There are 2 isozymes in PPU and only 1 in PAO. PP2265 and PP1945 are only similar to PA1796 in PAO.		y	y	y	y		( PP2265 ) or ( PP1945 )	PA1796	(PP2265) or (PP1945)	PA1796	n	Glyoxylate and dicarboxylate metabolism		bothmodels_diffnum	15	15	15	15
82	IR06374	5-Amino-6-(5-phosphoribitylamino)uracil:NADP+ 1'-oxidoreductase (R)	'5-Amino-6-(5''-phosphoribosylamino)uracil + NADPH + H+ -> NADP+ + 5-Amino-6-(5''-phosphoribitylamino)uracil '	G-->R association identical in iMO1056 and iJP829.		y	y	y	y		PP0514	PA4056	PP0514	PA4056	n	Riboflavin metabolism		G-->R association identical in PAO and PPU	15	15	15	15
83	IR00028	5-Aminolevulinate hydro-lyase(adding 5-aminolevulinate andcyclizing)	'2 5-Aminolevulinate -> 2 H2O + Porphobilinogen + H+ '	Keep it as it is. PA5243<==>PP3322		y	y	y	y		( PP2913 ) or ( PP3322 )	PA5243	(PP2913) or (PP3322)	PA5243	n	Porphyrin and chlorophyll metabolism		1modelnotreciprocal	15	15	15	15
84	IR00599	5-Methyltetrahydrofolate:L-homocysteine S-methyltransferase	'5-Methyltetrahydrofolate + L-Homocysteine -> L-Methionine + Tetrahydrofolate '	G-->R association identical in iMO1056 and iJP829.		y	y	y	y		PP2375	PA1843	PP2375	PA1843	n	Cysteine and methionine metabolism		G-->R association identical in PAO and PPU	15	15	15	15
85	IR05151	5-Methyltetrahydrofolate:NADP+ oxidoreductase	'5,10-Methylenetetrahydrofolate + H+ + NADH -> 5-Methyltetrahydrofolate + NAD+ '	G-->R association identical in iMO1056 and iJP829.		y	y	y	y		PP4977	PA0430	PP4977	PA0430	n	One carbon pool by folate		G-->R association identical in PAO and PPU	15	15	15	15
86	IR02457	5-Methyltetrahydropteroyltri-L-glutamate:L-homocysteineS-methyltransferase	'L-Homocysteine + 5-Methyltetrahydropteroyltri-L-glutamate -> L-Methionine + Tetrahydropteroyltri-L-glutamate '	Add PP4637 as an isozyme to the GPR of the reaction in iJP. PP4637 <==>PA1927		y	y	y	y		PP2698	PA1927	PP2698 or PP4637	PA1927	n	Cysteine and methionine metabolism		1modelnotreciprocal	14	15	14	15
87	RR02464	5-Methylthio-5-deoxy-D-ribose-1-phosphate ketol-isomerase	'5-Methylthio-D-ribose 1-phosphate <=> 5-Methylthio-5-deoxy-D-ribulose 1-phosphate '	G-->R association identical in iMO1056 and iJP829.		y	y	y	y		PP1766	PA3169	PP1766	PA3169	n	Cysteine and methionine metabolism		G-->R association identical in PAO and PPU	15	15	15	15
88	IR00945	5-O-(1-Carboxyvinyl)-3-phosphoshikimate phosphate-lyase	'5-O-(1-Carboxyvinyl)-3-phosphoshikimate -> Orthophosphate + Chorismate '	G-->R association identical in iMO1056 and iJP829.		y	y	y	y		PP1830	PA1681	PP1830	PA1681	n	Phenylalanine, tyrosine and tryptophan biosynthesis		G-->R association identical in PAO and PPU	15	15	15	15
89	RR02306	5-Phospho-D-ribosylamine:glycine ligase (ADP-forming)	'5-Phosphoribosylamine + Glycine + ATP <=> ADP + Orthophosphate + H+ + 5''-Phosphoribosylglycinamide '	G-->R association identical in iMO1056 and iJP829.		y	y	y	y		PP4823	PA4855	PP4823	PA4855	n	Purine metabolism		G-->R association identical in PAO and PPU	15	15	15	15
90	IR05071	5-Phosphoribosylamine:pyrophosphate phosphoribosyltransferase(glutamate-amidating) (R)	'5-Phospho-alpha-D-ribose 1-diphosphate + H2O + L-Glutamine -> 5-Phosphoribosylamine + L-Glutamate + Pyrophosphate '	G-->R association identical in iMO1056 and iJP829.		y	y	y	y		PP2000	PA3108	PP2000	PA3108	n	Purine metabolism		G-->R association identical in PAO and PPU	15	15	15	15
91	IR04010	5'-Phosphoribosylformylglycinamide:L-glutamine amido-ligase(ADP-forming)	'H2O + L-Glutamine + ATP + 5''-Phosphoribosyl-N-formylglycinamide -> L-Glutamate + ADP + Orthophosphate + H+ + 2-(Formamido)-N1-(5''-phosphoribosyl)acetamidine '	G-->R association identical in iMO1056 and iJP829.		y	y	y	y		PP1037	PA3763	PP1037	PA3763	n	Purine metabolism		G-->R association identical in PAO and PPU	15	15	15	15
92	IR00048	6,7-Dimethyl-8-(1-D-ribityl)lumazine:6,7-dimethyl-8-(1-D-ribityl)lumazine 2,3-butanediyltransferase	'2 6,7-Dimethyl-8-(1-D-ribityl)lumazine -> Riboflavin + 4-(1-D-Ribitylamino)-5-amino-2,6-dihydroxypyrimidine '	Remove PA4053 and PP0517 from the respective GPRs, PPU has two isozymes, PAO only one, PP0515<==>PA4055 /modification/ (10/22/2009) This reaction should be present there was some mistake.		y	y	y	y		( ( PP2916 and PP0517 ) or ( PP0515 and PP0517 ) )	PA4053, PA4055	PP0515 or PP2916	PA4055	n	Riboflavin metabolism		1modelnotreciprocal	14	14	14	14
93	IR01115	6-Phospho-D-gluconate hydro-lyase	'6-Phospho-D-gluconate -> H2O + 2-Dehydro-3-deoxy-6-phospho-D-gluconate '	G-->R association identical in iMO1056 and iJP829.		y	y	y	y		PP1010	PA3194	PP1010	PA3194	n	Pentose phosphate pathway		G-->R association identical in PAO and PPU	15	15	15	15
94	IR01114	6-Phospho-D-glucono-1,5-lactone lactonohydrolase	'H2O + D-Glucono-1,5-lactone 6-phosphate -> 6-Phospho-D-gluconate + H+ '	G-->R association identical in iMO1056 and iJP829.		y	y	y	y		PP1023	PA3182	PP1023	PA3182	n	Pentose phosphate pathway		G-->R association identical in PAO and PPU	15	15	15	15
95	IR00411	Acetaldehyde:NAD+ oxidoreductase	'H2O + Acetaldehyde + NAD+ -> Acetate + 2 H+ + NADH '	Since enzymes for aldehyde dehydrogenase reactions in PPU and PAO are generally promiscuous and not well defined, all aldehyde dehydrogenase type reactions will have the following associations: (iMO1056r) PA5312, PA0219, PA1984, PA4022, PA4073, PA4189, or PA4899; (iJP829) PP5278, PP2589, PP2680, PP5258, PP3463, PP0545, or PP2694. Note, this is an arbitrary decision: we could include more putative…		y	y	y	y		( PP5278 ) or ( PP2589 ) or ( PP2680 ) or ( PP5258 ) or ( PP3463 ) or ( PP0545 ) or ( PP2694 )	PA5312, PA0219, PA1984, PA4022	PP5278 or PP2589 or PP2680 or PP5258 or PP3463 or PP0545 or PP2694 or PP3357	PA5312 or PA0219 or PA1984 or PA4022 or PA4073 or PA4189 or PA4899 or PA1027	n	Glycolysis / Gluconeogenesis		aldehyde dehydrogenases	14	14	14	14
96	RR03551	Acetyl-CoA:acetyl-CoA C-acetyltransferase	'2 Acetyl-CoA <=> Acetoacetyl-CoA + CoA '	change gene associations to the following: (iMO1056r) PA2001 or PA2553 or PA3454 or PA3589 or PA3925 or PA1736 or PA2940 or PA3013 or PA4785 (1st 5 are EC 2.3.1.9, last 4 are EC 2.3.1.16), (iJP829r) PP2051 or PP2215 or PP3754 or PP4636 or PP0582 or PP2137 or PP3280 (1st 5 are EC 2.3.1.9, last 4 are EC 2.3.1.16). These associations are based on KEGG rxn associations. These enzymes are all highly r…		y	y	y	y		( PP4636 ) or ( PP2051 ) or ( PP3754 ) or ( PP2215 )	PA2001	PP2051 or PP2215 or PP3754 or PP4636 or PP0582 or PP2137 or PP3280	PA2001 or PA2553 or PA3454 or PA3589 or PA3925 or PA1736 or PA2940 or PA3013 or PA4785	n	Fatty acid metabolism		bothmodels_diffnum	14	14	14	14
97	RR00438	Acetyl-CoA:carbon-dioxide ligase (ADP-forming)	'HCO3 + Acetyl-CoA + ATP <=> ADP + Orthophosphate + Malonyl-CoA + H+ '	PP0559 <--> PA4847 with 74% homology. Both have annotation 'acetyl CoA carboxylase biotin carboxyl carrier protein, accB. Add PP0559 to iJP829 with 'and' logic.		y	y	y	y		( PP1996 and PP1607 and PP0558 )	PA3639, PA4847, PA3112, PA4848	(PP1996 and PP1607 and PP0558 and PP0559)	PA3639 and PA4847 and PA3112 and PA4848	n	Tetracycline biosynthesis		bothmodels_diffnum	14	15	14	15
98	IR02782	Acetyl-CoA:D-glucosamine-1-phosphate N-acetyltransferase	'Acetyl-CoA + D-Glucosamine 1-phosphate -> N-Acetyl-D-glucosamine 1-phosphate + H+ + CoA '	G-->R association identical in iMO1056 and iJP829.		y	y	y	y		PP5411	PA5552	PP5411	PA5552	n	Amino sugar and nucleotide sugar metabolism		G-->R association identical in PAO and PPU	15	15	15	15
99	IR00125	Acetyl-CoA:L-glutamate N-acetyltransferase	'L-Glutamate + Acetyl-CoA -> N-Acetyl-L-glutamate + H+ + CoA '	Add PA4402 as an isoenzyme to the GPR of the reaction in iMO. It is an reciprocal of PP1346		y	y	y	y		( PP5185 ) or ( PP1346 )	PA5204	(PP5185) or (PP1346)	PA5204 or PA4402	n	Urea cycle and metabolism of amino groups		1modelnotreciprocal	15	14	15	14
100	RR03546	Acetyl-CoA:orthophosphate acetyltransferase	'Acetyl-CoA + Orthophosphate <=> Acetyl phosphate + CoA '	G-->R association identical in iMO1056 and iJP829.		y	y	y	y		PP0774	PA0835	PP0774	PA0835	n	Taurine and hypotaurine metabolism		G-->R association identical in PAO and PPU	15	15	15	15
101	IR08876	acetylornithine deacetylation	'N2-Acetyl-L-ornithine + H2O -> Acetate + L-Ornithine '	Add PA5390 as an isozyme to the GPR of iMO. It is the homolog of PP3571		y	y	y	y		( PP5186 ) or ( PP3571 )	PA5206	(PP5186) or (PP3571)	PA5206 or PA5390	n	Urea cycle and metabolism of amino groups		1modelnotreciprocal	15	14	15	14
102	IR04315	Acyl-[acyl-carrier-protein]:malonyl-[acyl-carrier-protein] C-acyltransferase (decarboxylating)	'Acetyl-ACP + Malonyl-[acyl-carrier protein] + H+ -> Acetoacetyl-ACP + CO2 + acyl carrier protein '	associate PA0999, PA3268, and PA3333 with iMO1056r, and associate PP3787, PP4379, and PP4545 with iJP829r (all 'or' relationships). These are 'FabH' (3-oxoacyl synthase III) proteins (according to annotations and BLAST searches), which are different from FabF and FabB (3-oxoacyl synthases I and II). Note, PP3787 has much better homology to some Na+/H+ antiporters than to other FabH's. Also, PP437…		y	y	y	y		( PP1916 ) or ( PP4545 ) or ( PP2795 ) or ( PP3553 ) or ( PP3303 ) or ( PP4379 ) or ( PP4175 )	PA1609 or PA2965 or PA5174	PP3787 or PP4379 or PP4545	PA0999 or PA3286 or PA3333	n	Fatty acid biosynthesis		bothmodels_diffnum	14	14	14	14
103	IR03505	Adenosine 5'-monophosphate phosphohydrolase	'H2O + AMP -> Orthophosphate + Adenosine '	Keep as is. There are no matches in PAO1 to PP1414 and PP2531 (5' nucleotidases) from BLAST search in PSEUDOCAP, and the matches in our own BLAST search (PA3589 and PA3919) have unrelated annotations. Strangely, PP1414 and PP2531 have no homology for each other. Note, many enzymes for these reactions have broad specificity, so there might be other enzymes that can act as isozymes.		y	y	y	y		( PP1414 ) or ( PP1620 ) or ( PP2531 )	PA3625	(PP1414) or (PP1620) or (PP2531)	PA3625	n	Purine metabolism		bothmodels_diffnum	15	15	15	15
104	IR03708	Adenosine aminohydrolase	'H2O + Adenosine + H+ -> NH4+ + Inosine '	G-->R association identical in iMO1056 and iJP829.		y	y	y	y		PP0591	PA0148	PP0591	PA0148	n	Purine metabolism		G-->R association identical in PAO and PPU	15	15	15	15
105	IR00791	Adenosine ribohydrolase	'H2O + Adenosine -> D-Ribose + Adenine '	G-->R association identical in iMO1056 and iJP829.		y	y	y	y		PP2460	PA0143	PP2460	PA0143	n	Purine metabolism		G-->R association identical in PAO and PPU	15	15	15	15
106	RR08879	adenylate kinase	'AMP + ATP <=> 2 ADP '	G-->R association identical in iMO1056 and iJP829.		y	y	y	y		PP1506	PA3686	PP1506	PA3686	n	Purine metabolism		G-->R association identical in PAO and PPU	15	15	15	15
107	IR03609	Agmatine amidinohydrolase	'H2O + Agmatine -> Urea + Putrescine '	Keep it as it is, there is no difference. All 4 genes are so similar to each other, tha it's hard to say which is reciprocal of which.		y	y	y	y		( PP2196 ) or ( PP4523 )	PA0288, PA1421	(PP2196) or (PP4523)	PA0288 or PA1421	n	Arginine and proline metabolism		1modelnotreciprocal	15	15	15	15
108	RR04371	AIRC3	'1-(5-Phospho-D-ribosyl)-5-amino-4-imidazolecarboxylate <=> 5-phosphoribosyl-5-carboxyaminoimidazole '	G-->R association identical in iMO1056 and iJP829.		y	y	y	y		PP5336	PA5426	PP5336	PA5426	n	Purine metabolism		G-->R association identical in PAO and PPU	15	15	15	15
109	RR08763	AKGt2r	'H+[e] + 2-Oxoglutarate[e] <=> 2-Oxoglutarate + H+ '	add to iMO1056 PA0229-->PcaT as isozyme. Changed confidence class to class 2. /modification/ (5/26/2010) PP1378 added to the GPR (reciprocal check)		y	y	y	y		( PP1400 ) or ( PP1378 ) or ( PP4461 )	PA5530	PP1400 or PP4461 or PP1378	PA5530 or PA0229	n	Transport		bothmodels_diffnum	15	14	15	14
110	IR03504	AMP phosphoribohydrolase	'H2O + AMP -> D-Ribose 5-phosphate + Adenine '	G-->R association identical in iMO1056 and iJP829.		y	y	y	y		PP4779	PA3970	PP4779	PA3970	n	Purine metabolism		G-->R association identical in PAO and PPU	15	15	15	15
111	IR08753	ARGabc	'L-Arginine[e] + H2O + ATP -> ADP + L-Arginine + Orthophosphate + H+ '	Keep #8753 in both organisms. Redo associations: ((PA0888 or PA5153) and (PA0889 or PA0890 or PA5154 or PA5155) and (PA0892 or PA5152)) and ((PP4486 or PP0282) and (PP4485 or PP4484 or PP0281 or PP0280) and (PP4483 or PP0283)), based on annotated function (and roles in ATP transport: arginine binding, permease component, ATP binding). These genes in PAO are all reciprocally matched to the PPU gen…		y	y	y	y		( PP4486 and PP4485 and PP4484 and PP4483 )	PA5153+PA5154+PA5152+PA5155, PA1260+PA1257+PA1256+PA1258, PA0888, PA0890, PA0889, PA0892	((PP4486 or PP0282) and (PP4485 or PP4484 or PP0281 or PP0280) and (PP4483 or PP0283))	((PA0888 or PA5153) and (PA0889 or PA0890 or PA5154 or PA5155) and (PA0892 or PA5152))	n	Transport		transport	14	14	14	14
112	IR08746	ASPabc	'L-Aspartate[e] + H2O + ATP -> ADP + Orthophosphate + L-Aspartate + H+ '	Keep #8746 in both models, with the following associations: (PA1342 and PA1340 and PA1341 and PA1339) and (PP1071 and PP1069 and PP1070 and PP1068), based on KEGG functional annotation. There are other possible proteins, but they are low confidence. These genes correspond to (GltI and GltK and GltJ and GltL), and they are all reciprocal matches to their respective PA-PP partner.		y	y	y	y		( PP1070 and PP1069 and PP1071 and PP1068 )	PA1339+PA1341+PA1342+PA1340, PA4192+PA4195+PA4194, PA1260+PA1257+PA1256+PA1258	(PP1071 and PP1069 and PP1070 and PP1068)	(PA1342 and PA1340 and PA1341 and PA1339)	n	Transport		transport	15	14	15	14
113	IR03030	ATP + D-Glycero-D-manno-heptose 1-phosphate <=> Pyrophosphate +ADP-D-glycero-D-manno-heptose	'D-Glycero-D-manno-heptose 1-phosphate + H+ + ATP -> Pyrophosphate + ADP-D-glycero-D-manno-heptose '	G-->R association identical in iMO1056 and iJP829.		y	y	y	y		PP4934	PA4996	PP4934	PA4996	n	Lipopolysaccharide biosynthesis		G-->R association identical in PAO and PPU	15	15	15	15
114	IR03032	ATP + D-Glycero-D-manno-heptose 7-phosphate <=> ADP +D-Glycero-D-manno-heptose 1,7-bisphosphate	'D-Glycero-D-manno-heptose 7-phosphate + ATP -> ADP + H+ + D-Glycero-D-manno-heptose 1,7-bisphosphate '	G-->R association identical in iMO1056 and iJP829.		y	y	y	y		PP4934	PA4996	PP4934	PA4996	n	Lipopolysaccharide biosynthesis		G-->R association identical in PAO and PPU	15	15	15	15
115	IR00064	ATP pyrophosphate-lyase (cyclizing)	'ATP -> 3'',5''-Cyclic AMP + Pyrophosphate '	Keep as is. This is a real difference, since PA2191 and PA3217 have no homologs in PPU (as confirmed by BLAST on pseudomonas.com).		y	y	y	y		PP5222	PA2191, PA3217, PA5272	PP5222	PA2191 or PA3217 or PA5272	n	Purine metabolism		1model_reciprocal	15	15	15	15
116	RR08593	ATP synthase (four protons for one ATP)	'4 H+[e] + ADP + Orthophosphate <=> H2O + 3 H+ + ATP '	There are 8 subunits to ATP synthase. G-->R should be as follows: (iMO1056r): (PA5553 + PA5554 + PA5555 + PA5556 + PA5557 + PA5558 + PA5559 + PA5560), (iJP829r): (PP5412 + PP5413 + PP5414 + PP5415 + PP5416 + PP5417 + PP5418 + PP5419). PP5418 does not appear in PSEUDOCAP, but BLASTn of PA5559 against PPU genome shows a 94% match to a stretch of genome between PP5417 and PP5419, and PP5418 is annot…		y	y	y	y		( PP5419 and PP5413 and PP5412 and PP5416 and PP5415 and PP5414 and PP5417 )	PA1697, PA1104, PA5553, PA5555, PA5557, PA5558, PA5559, PA5554, PA5561, PA5560, PA5556	PP5412 and PP5413 and PP5414 and PP5415 and PP5416 and PP5417 and PP5418 and PP5419	PA5553 and PA5554 and PA5555 and PA5556 and PA5557 and PA5558 and PA5559 and PA5560	n	Flagellar assembly		other	14	14	14	14
117	IR03022	ATP: 4-(Cytidine 5'-diphospho)-2-C-methyl-D-erythritol2-phosphotransferase	'4-(Cytidine 5''-diphospho)-2-C-methyl-D-erythritol + ATP -> ADP + H+ + 2-Phospho-4-(cytidine 5''-diphospho)-2-C-methyl-D-erythritol '	G-->R association identical in iMO1056 and iJP829.		y	y	y	y		PP0723	PA4669	PP0723	PA4669	n	Biosynthesis of terpenoids and steroids		G-->R association identical in PAO and PPU	15	15	15	15
118	RR00171	ATP:(d)GMP phosphotransferase	'ATP + GMP <=> GDP + ADP '	G-->R association identical in iMO1056 and iJP829.		y	y	y	y		PP5296	PA5336	PP5296	PA5336	n	Purine metabolism		G-->R association identical in PAO and PPU	15	15	15	15
119	RR01147	ATP:(d)GMP phosphotransferase	'ATP + dGMP <=> ADP + dGDP '	G-->R association identical in iMO1056 and iJP829.		y	y	y	y		PP5296	PA5336	PP5296	PA5336	n	Purine metabolism		G-->R association identical in PAO and PPU	15	15	15	15
120	IR03677	ATP:(R)-glycerate 3-phosphotransferase	'D-Glycerate + ATP -> ADP + 3-Phospho-D-glycerate + H+ '	G-->R association identical in iMO1056 and iJP829.		y	y	y	y		PP3178	PA1052	PP3178	PA1052	n	Glycine, serine and threonine metabolism		G-->R association identical in PAO and PPU	15	15	15	15
121	IR02019	ATP:2-amino-4-hydroxy-6-hydroxymethyl-7,8-dihydropteridine6'-pyrophosphotransferase	'2-Amino-4-hydroxy-6-hydroxymethyl-7,8-dihydropteridine + ATP -> 2-Amino-7,8-dihydro-4-hydroxy-6-(diphosphooxymethyl)pteridine + AMP + H+ '	Include PP0393 as isozyme in iJP929r. PP0393 is annotated as FolK-1 in PSEUDOCAP (whereas PP4698 is annotated as FolK-2), and has 73% nucleotide BLAST identity tp PA0583, which is a hypothetical protein but has cog descriptions of HPPK function.		y	y	y	y		PP4698	PA0583, PA4728	PP4698 or PP0393	PA0583 or PA4728	n	Folate biosynthesis		bothmodels_diffnum	14	15	14	15
122	RR03675	ATP:3-phospho-D-glycerate 1-phosphotransferase	'3-Phospho-D-glycerate + ATP <=> ADP + 1,3-Bisphospho-D-glycerate '	G-->R association identical in iMO1056 and iJP829.		y	y	y	y		PP4963	PA0552	PP4963	PA0552	n	Glycolysis / Gluconeogenesis		G-->R association identical in PAO and PPU	15	15	15	15
123	IR04030	ATP:4-amino-2-methyl-5-phosphomethylpyrimidine phosphotransferase	'4-Amino-2-methyl-5-phosphomethylpyrimidine + ATP -> ADP + 2-Methyl-4-amino-5-hydroxymethylpyrimidine diphosphate '	G-->R association identical in iMO1056 and iJP829.		y	y	y	y		PP4782	PA3975	PP4782	PA3975	n	Thiamine metabolism		G-->R association identical in PAO and PPU	15	15	15	15
124	IR02007	ATP:4-amino-5-hydroxymethyl-2-methylpyrimidine 5-phosphotransferase	'ATP + 4-Amino-5-hydroxymethyl-2-methylpyrimidine -> ADP + 4-Amino-2-methyl-5-phosphomethylpyrimidine + H+ '	G-->R association identical in iMO1056 and iJP829.		y	y	y	y		PP4782	PA3975	PP4782	PA3975	n	Thiamine metabolism		G-->R association identical in PAO and PPU	15	15	15	15
125	IR00265	ATP:adenylylsulfate 3'-phosphotransferase	'ATP + Adenylylsulfate -> ADP + 3''-Phosphoadenylyl sulfate + H+ '	Set the GPR of the reactiuon in iMO to be: "PA1393 or PA4442", PA4442<==>PP1304		y	y	y	y		PP1304	PA1393	PP1304	PA1393 or PA4442	n	Purine metabolism		1modelnotreciprocal	15	14	15	14
126	RR03698	ATP:AMP phosphotransferase	'dAMP + ATP <=> ADP + dADP '	G-->R association identical in iMO1056 and iJP829.		y	y	y	y		PP1506	PA3686	PP1506	PA3686	n	Purine metabolism		G-->R association identical in PAO and PPU	15	15	15	15
127	RR00268	ATP:CMP phosphotransferase	'CMP + ATP <=> ADP + CDP '	G-->R association identical in iMO1056 and iJP829.		y	y	y	y		PP1771	PA3163	PP1771	PA3163	n	Pyrimidine metabolism		G-->R association identical in PAO and PPU	15	15	15	15
128	RR00910	ATP:CMP phosphotransferase	'dCMP + ATP <=> ADP + dCDP '	G-->R association identical in iMO1056 and iJP829.		y	y	y	y		PP1771	PA3163	PP1771	PA3163	n	Pyrimidine metabolism		G-->R association identical in PAO and PPU	15	15	15	15
129	IR00094	ATP:dephospho-CoA 3'-phosphotransferase	'Dephospho-CoA + ATP -> ADP + H+ + CoA '	G-->R association identical in iMO1056 and iJP829.		y	y	y	y		PP0631	PA4529	PP0631	PA4529	n	Pantothenate and CoA biosynthesis		G-->R association identical in PAO and PPU	15	15	15	15
130	IR00962	ATP:D-Gluconate 6-phosphotransferase	'D-Gluconic acid + ATP -> ADP + 6-Phospho-D-gluconate + H+ '	remove one instance of PA2321 from iMO1056r. It is repeated twice. /modification/ fixed gene associations 10/24/2009		y	y	y	y		PP3416	PA2321, PA2321	PP3416	PA2321	n	Pentose phosphate pathway		possible functional equivalents	15	14	15	14
131	IR00149	ATP:D-glucose 6-phosphotransferase	'D-Glucose + ATP -> ADP + D-Glucose 6-phosphate + H+ '	G-->R association identical in iMO1056 and iJP829.		y	y	y	y		PP1011	PA3193	PP1011	PA3193	n	Streptomycin biosynthesis		G-->R association identical in PAO and PPU	15	15	15	15
132	RR00674	ATP:D-ribose-5-phosphate pyrophosphotransferase	'D-Ribose 5-phosphate + ATP <=> 5-Phospho-alpha-D-ribose 1-diphosphate + AMP + H+ '	G-->R association identical in iMO1056 and iJP829.		y	y	y	y		PP0722	PA4670	PP0722	PA4670	n	Pentose phosphate pathway		G-->R association identical in PAO and PPU	15	15	15	15
133	RR01155	ATP:dTMP phosphotransferase	'dUMP + ATP <=> ADP + dUDP '	G-->R association identical in iMO1056 and iJP829.		y	y	y	y		PP1593	PA3654	PP1593	PA3654	n	Pyrimidine metabolism		G-->R association identical in PAO and PPU	15	15	15	15
134	IR00114	ATP:FMN adenylyltransferase	'FMN + H+ + ATP -> FAD + Pyrophosphate '	G-->R association identical in iMO1056 and iJP829.		y	y	y	y		PP0602	PA4561	PP0602	PA4561	n	Riboflavin metabolism		G-->R association identical in PAO and PPU	15	15	15	15
135	IR00522	ATP:glycerol 3-phosphotransferase	'Glycerol + ATP -> ADP + sn-Glycerol 3-phosphate + H+ '	keep as is. PA3582 <--> PP1075 with 82%n homology, but PA3579 and PA1487 (both putative GlpK genes by COG prediction and annotated as 'probable carbohydrate kinase') have no homologs in PPU (nor does PA3582, except for PP1075).		y	y	y	y		PP1075	PA3582, PA3579, PA1487	PP1075	PA3582 or PA3579 or PA1487	n	Glycerolipid metabolism		bothmodels_diffnum	15	15	15	15
136	IR03560	ATP:GTP 3'-pyrophosphotransferase	'ATP + GTP -> Guanosine 3''-diphosphate 5''-triphosphate + AMP + H+ '	G-->R association identical in iMO1056 and iJP829.		y	y	y	y		PP1656	PA0934	PP1656	PA0934	n	Purine metabolism		G-->R association identical in PAO and PPU	15	15	15	15
137	IR03552	ATP:L-glutamate 5-phosphotransferase	'L-Glutamate + ATP -> ADP + L-Glutamyl 5-phosphate '	G-->R association identical in iMO1056 and iJP829.		y	y	y	y		PP0691	PA4565	PP0691	PA4565	n	Urea cycle and metabolism of amino groups		G-->R association identical in PAO and PPU	15	15	15	15
138	IR00986	ATP:L-homoserine O-phosphotransferase	'ATP + L-Homoserine -> ADP + O-Phospho-L-homoserine + H+ '	Keep as is. This is a true difference. There is no ThrH gene (PA1757) in PPU. Both PPU and PAO have ThrB (PA5495 and PP0121).		y	y	y	y		PP0121	PA1757, PA5495	PP0121	PA1757 or PA5495	n	Glycine, serine and threonine metabolism		bothmodels_diffnum	15	15	15	15
139	IR07876	ATP:L-methione S-adenosyltransferase (R)	'L-Methionine + H2O + ATP -> Pyrophosphate + S-Adenosyl-L-methionine + Orthophosphate '	G-->R association identical in iMO1056 and iJP829.		y	y	y	y		PP4967	PA0546	PP4967	PA0546	n	Cysteine and methionine metabolism		G-->R association identical in PAO and PPU	15	15	15	15
140	IR01527	ATP:N-acetyl-L-glutamate 5-phosphotransferase	'N-Acetyl-L-glutamate + ATP -> N-Acetyl-L-glutamate 5-phosphate + ADP '	G-->R association identical in iMO1056 and iJP829.		y	y	y	y		PP5289	PA5323	PP5289	PA5323	n	Urea cycle and metabolism of amino groups		G-->R association identical in PAO and PPU	15	15	15	15
141	IR00074	ATP:NAD+ 2'-phosphotransferase	'ATP + NAD+ -> ADP + NADP+ + H+ '	G-->R association identical in iMO1056 and iJP829.		y	y	y	y		PP2012	PA3088	PP2012	PA3088	n	Nicotinate and nicotinamide metabolism		G-->R association identical in PAO and PPU	15	15	15	15
142	RR00109	ATP:nucleoside-diphosphate phosphatransferase	'UDP + ATP <=> ADP + UTP '	G-->R association identical in iMO1056 and iJP829.		y	y	y	y		PP0849	PA3807	PP0849	PA3807	n	Pyrimidine metabolism		G-->R association identical in PAO and PPU	15	15	15	15
143	RR00170	ATP:nucleoside-diphosphate phosphatransferase	'GDP + ATP <=> ADP + GTP '	G-->R association identical in iMO1056 and iJP829.		y	y	y	y		PP0849	PA3807	PP0849	PA3807	n	Purine metabolism		G-->R association identical in PAO and PPU	15	15	15	15
144	RR00311	ATP:nucleoside-diphosphate phosphatransferase	'CDP + ATP <=> ADP + CTP '	G-->R association identical in iMO1056 and iJP829.		y	y	y	y		PP0849	PA3807	PP0849	PA3807	n	Pyrimidine metabolism		G-->R association identical in PAO and PPU	15	15	15	15
145	RR01038	ATP:nucleoside-diphosphate phosphatransferase	'dGDP + ATP <=> ADP + dGTP '	G-->R association identical in iMO1056 and iJP829.		y	y	y	y		PP0849	PA3807	PP0849	PA3807	n	Purine metabolism		G-->R association identical in PAO and PPU	15	15	15	15
146	RR01150	ATP:nucleoside-diphosphate phosphatransferase	'dTDP + ATP <=> ADP + dTTP '	G-->R association identical in iMO1056 and iJP829.		y	y	y	y		PP0849	PA3807	PP0849	PA3807	n	Pyrimidine metabolism		G-->R association identical in PAO and PPU	15	15	15	15
147	RR01290	ATP:nucleoside-diphosphate phosphatransferase	'dCDP + ATP <=> ADP + dCTP '	G-->R association identical in iMO1056 and iJP829.		y	y	y	y		PP0849	PA3807	PP0849	PA3807	n	Pyrimidine metabolism		G-->R association identical in PAO and PPU	15	15	15	15
148	RR01295	ATP:nucleoside-diphosphate phosphatransferase	'dUDP + ATP <=> ADP + dUTP '	G-->R association identical in iMO1056 and iJP829.		y	y	y	y		PP0849	PA3807	PP0849	PA3807	n	Pyrimidine metabolism		G-->R association identical in PAO and PPU	15	15	15	15
149	RR03591	ATP:nucleoside-diphosphate phosphatransferase	'dADP + ATP <=> ADP + dATP '	G-->R association identical in iMO1056 and iJP829.		y	y	y	y		PP0849	PA3807	PP0849	PA3807	n	Purine metabolism		G-->R association identical in PAO and PPU	15	15	15	15
150	RR00111	ATP:nucleoside-phosphate phosphotransferase	'UMP + ATP <=> UDP + ADP '	4		y	y	y	y		PP1771	PA3654	PP1771 or PP1593	PA3654 or PA3163	n	Pyrimidine metabolism		1modelnotreciprocal	14	14	14	14
151	IR01079	ATP:pyridoxal 5'-phosphotransferase	'Pyridoxine + ATP -> ADP + H+ + Pyridoxine phosphate '	G-->R association identical in iMO1056 and iJP829.		y	y	y	y		PP5357	PA5516	PP5357	PA5516	n	Vitamin B6 metabolism		G-->R association identical in PAO and PPU	15	15	15	15
152	IR01425	ATP:pyridoxal 5'-phosphotransferase	'Pyridoxamine + ATP -> ADP + H+ + Pyridoxamine phosphate '	G-->R association identical in iMO1056 and iJP829.		y	y	y	y		PP5357	PA5516	PP5357	PA5516	n	Vitamin B6 metabolism		G-->R association identical in PAO and PPU	15	15	15	15
153	IR03497	ATP:pyridoxal 5'-phosphotransferase	'Pyridoxal + ATP -> ADP + Pyridoxal phosphate + H+ '	G-->R association identical in iMO1056 and iJP829.		y	y	y	y		PP5357	PA5516	PP5357	PA5516	n	Vitamin B6 metabolism		G-->R association identical in PAO and PPU	15	15	15	15
154	IR07898	ATP:pyruvate O2-phosphotransferase (R)	'ADP + H+ + Phosphoenolpyruvate -> Pyruvate + ATP '	G-->R association identical in iMO1056 and iJP829.		y	y	y	y		( PP1362 ) or ( PP4301 )	PA4329, PA1498	(PP1362) or (PP4301)	PA4329 or PA1498	n	Glycolysis / Gluconeogenesis		G-->R association identical in PAO and PPU	15	15	15	15
155	IR03520	ATP:pyruvate,water phosphotransferase	'H2O + Pyruvate + ATP -> Orthophosphate + AMP + 2 H+ + Phosphoenolpyruvate '	G-->R association identical in iMO1056 and iJP829.		y	y	y	y		PP2082	PA1770	PP2082	PA1770	n	Pyruvate metabolism		G-->R association identical in PAO and PPU	15	15	15	15
156	IR00293	ATP:riboflavin 5'-phosphotransferase	'Riboflavin + ATP -> FMN + ADP + H+ '	G-->R association identical in iMO1056 and iJP829.		y	y	y	y		PP0602	PA4561	PP0602	PA4561	n	Riboflavin metabolism		G-->R association identical in PAO and PPU	15	15	15	15
157	RR02085	ATP:selenide, water phosphotransferase	'H2O + Selenide + ATP <=> Selenophosphate + Orthophosphate + AMP '	G-->R association identical in iMO1056 and iJP829.		y	y	y	y		PP0823	PA1642	PP0823	PA1642	n	Selenoamino acid metabolism		G-->R association identical in PAO and PPU	15	15	15	15
158	IR01357	ATP:shikimate 3-phosphotransferase	'Shikimate + ATP -> ADP + Shikimate 3-phosphate + H+ '	G-->R association identical in iMO1056 and iJP829.		y	y	y	y		PP5079	PA5039	PP5079	PA5039	n	Phenylalanine, tyrosine and tryptophan biosynthesis		G-->R association identical in PAO and PPU	15	15	15	15
159	IR03012	Benzoate + NADH + H+ + Oxygen <=>1,6-Dihydroxy-cis-2,4-cyclohexadiene-1-carboxylic acid + NAD+	'Oxygen + Benzoate + 2 H+ + NADH -> 1,6-Dihydroxy-cis-2,4-cyclohexadiene-1-carboxylic acid + NAD+ '	PP3163 <--> PA2516 with 78% homology. Add PP3163 to iJP829 with 'and' logic, since it is similar to PA2516 and has the annotation 'benzoate dioxygenase, benC, ferridoxin component'.		y	y	y	y		( PP3161 and PP3162 )	PA2517, PA2516, PA2518	(PP3161 and PP3162 and PP3163)	PA2517 or PA2516 or PA2518	n	Benzoate degradation via hydroxylation		bothmodels_diffnum	14	15	14	15
160	IR00559	beta-Aminopropion aldehyde:NAD+ oxidoreductase	'H2O + beta-Aminopropion aldehyde + NAD+ -> beta-Alanine + H+ + NADH '	Since enzymes for aldehyde dehydrogenase reactions in PPU and PAO are generally promiscuous and not well defined, all aldehyde dehydrogenase type reactions will have the following associations: (iMO1056r) PA5312, PA0219, PA1984, PA4022, PA4073, PA4189, or PA4899; (iJP829) PP5278, PP2589, PP2680, PP5258, PP3463, PP0545, or PP2694. Note, this is an arbitrary decision: we could include more putative…		y	y	y	y		( PP5278 ) or ( PP2589 ) or ( PP2680 ) or ( PP5258 ) or ( PP3463 ) or ( PP0545 ) or ( PP2694 )	PA5312	PP5278 or PP2589 or PP2680 or PP5258 or PP3463 or PP0545 or PP2694 or PP3357	PA5312 or PA0219 or PA1984 or PA4022 or PA4073 or PA4189 or PA4899 or PA1027	n	beta-Alanine metabolism		aldehyde dehydrogenases	14	14	14	14
161	IR00696	Biotin:CoA ligase (AMP-forming)	'Biotin + H+ + ATP -> Biotinyl-5''-AMP + Pyrophosphate '	G-->R association identical in iMO1056 and iJP829.		y	y	y	y		PP0437	PA4280	PP0437	PA4280	n	Biotin metabolism		G-->R association identical in PAO and PPU	15	15	15	15
162	IR09642	Butyryl-[acyl-carrier protein]:malonyl-[acyl-carrier-protein]C-acyltransferase (decarboxylating)	'Butyryl-[acyl-carrier protein] + Malonyl-[acyl-carrier protein] + H+ -> CO2 + 3-Oxohexanoyl-[acyl-carrier protein] + acyl carrier protein '	Remove from iJP829 PP4545, PP4379, PP3533, and PP2795 because the first 2 are FabH (3-oxoacyl ACP synthase III), not FabB or FabF, and thus involved in initiation but not elongation of fatty acids, and the last 2 are not seemingly relevant to this reaction. Add to iJP829 PP2780 and PP2778 (both FabF), since both are annotated as 3-oxoacyl ACP synthase II and they have 30% and 28% homology to PA16…		y	y	y	y		( PP1916 ) or ( PP4545 ) or ( PP2795 ) or ( PP3553 ) or ( PP3303 ) or ( PP4379 ) or ( PP4175 )	PA1609	PP1916 or PP4175	PA1609	n	Fatty acid biosynthesis		bothmodels_diffnum	14	15	14	15
163	IR03648	Carbamoyl-phosphate:L-aspartate carbamoyltransferase	'Carbamoyl phosphate + L-Aspartate -> Orthophosphate + N-Carbamoyl-L-aspartate + H+ '	G-->R association identical in iMO1056 and iJP829. /modification/ (5/26/2010) The GPRs changed to: PP4998 and PP4999; PA0401 and PA0402 (reciprocal-check)		y	y	y	y		PP4998	PA0402	PP4998 and PP4999	PA0401 and PA0402	n	Pyrimidine metabolism		G-->R association identical in PAO and PPU	14	14	14	14
164	RR03649	Carbamoyl-phosphate:L-ornithine carbamoyltransferase	'L-Ornithine + Carbamoyl phosphate <=> Orthophosphate + H+ + L-Citrulline '	G-->R association identical in iMO1056 and iJP829.		y	y	y	y		( PP1079 ) or ( PP1000 )	PA3537, PA5172	(PP1079) or (PP1000)	PA3537 or PA5172	n	Urea cycle and metabolism of amino groups		G-->R association identical in PAO and PPU	15	15	15	15
165	IR00316	Carbon-dioxide:L-glutamine amido-ligase (ADP-forming,carbamate-phosphorylating)	'HCO3 + H2O + L-Glutamine + 2 ATP -> L-Glutamate + 2 ADP + Carbamoyl phosphate + Orthophosphate + 2 H+ '	G-->R association identical in iMO1056 and iJP829.		y	y	y	y		( PP4724 and PP4723 )	PA4758, PA4756	(PP4724 and PP4723)	PA4758 or PA4756	n	Pyrimidine metabolism		G-->R association identical in PAO and PPU	15	15	15	15
166	IR00495	Catechol:oxygen 1,2-oxidoreductase(decyclizing)	'Oxygen + Catechol -> cis,cis-Muconate '	G-->R association identical in iMO1056 and iJP829.		y	y	y	y		PP3713	PA2507	PP3713	PA2507	n	Benzoate degradation via hydroxylation		G-->R association identical in PAO and PPU	15	15	15	15
167	IR08640	choline transport via ABC system	'Choline[e] + H2O + ATP -> Choline + ADP + Orthophosphate + H+ '	PROLBabc, GBBTNabc, CRNabc, GLYBabc, PROabc, and CHLabc (ABC transporters for proline betaine, gamma-butyrobetaine, carnitine, glycine-betaine, proline, and choline) should be associated with (ProV+ProW+ProX), and PROabc, GLYBabc, and CHLabc also with (OpuBA+OpuBB+OpuBC) as well, according to TCDB (ProVWX = 3.A.1.12.1, OpuBABC = 3.A.1.12.3 and 3.A.1.12.8). Therefore, gene associations should be a…		y	y	y	y		( ( PP0296 and PP0295 and PP0294 ) or ( PP2775 and PP2774 ) or ( PP3559 ) or ( PP0869 and PP0870 and PP0871 and PP0868 ) )	PA5378, PA3889, PA3891, PA5376, PA5377, PA3890, PA3888, PA3890, PA3891, PA3889	((PP2774 or PP0294) and (PP3559 or PP0295 or PP2774) and (PP3558 or PP2775 or PP0296 or PP0304 or PP1741 or PP0076)) or (PP0868 and (PP0869 or PP0871) and PP0870)	((PA5094 or PA5376) and (PA5095 or PA5377) and (PA5103 or PA5096 or PA3236 or PA5378 or PA0030 or PA5388)) or (PA3891 and (PA3890 or PA3888) and PA3889)	n	Transport		bothmodels_diffnum	14	14	14	14
168	IR00633	Chorismate pyruvate-lyase (amino-accepting)	'Chorismate + L-Glutamine -> L-Glutamate + Pyruvate + Anthranilate + H+ '	Keep it as it is. PAO is known to have two anthranilate synthases one for metabolic purposes (trp) and one for the synthesis of phenazines (phn). Putida has only the former.		y	y	y	y		( PP0420 and PP0417 )	PA1002, PA1001, PA0609, PA0649	(PP0420 and PP0417)	PA1002 or PA1001 or PA0609 or PA0649	n	Phenylalanine, tyrosine and tryptophan biosynthesis		1modelnotreciprocal	15	15	15	15
169	IR00946	Chorismate pyruvatemutase	'Chorismate -> Prephenate '	PP1770 <--> PA3164 with 78% homology. PP1770 has function prephenate dehydrogenase/3-phosphoshikimate 1-carboxyvinyltransferase. Doesn't have chorismate mutase function, in annotation (KEGG). Also, BLAST reveals that PP1770 has no similarity to PP1769. Remove PP1770.		y	y	y	y		( PP1770 and PP1769 )	PA3166	PP1769	PA3166	n	Phenylalanine, tyrosine and tryptophan biosynthesis		bothmodels_diffnum	14	15	14	15
170	IR00947	Chorismate:L-glutamine amido-ligase	'Chorismate + L-Glutamine -> L-Glutamate + 4-amino-4-deoxychorismate '	G-->R association identical in iMO1056 and iJP829.		y	y	y	y		PP2329	PA1758	PP2329	PA1758	n	Folate biosynthesis		G-->R association identical in PAO and PPU	15	15	15	15
171	IR04564	Citrate oxaloacetate-lyase ((pro-3S)-CH2COO- -> acetyl-CoA) (R)	'Oxaloacetate + H2O + Acetyl-CoA -> H+ + CoA + Citrate '	Add PP2335 as isozyme to iJP829r (due to 84% BLASTn identity with PA0795, and annotation as a bifunctional methylcitrate/citrate synthase). /modification/ 6/7/2010 The reciprocal pair PP2335/Pa0795 will be removed from the GPRs. This is a consequence of revalidation with "acetate" PPU mutants.		y	y	y	y		PP4194	PA1580 or PA0795	PP4194	PA1580	n	Citrate cycle (TCA cycle)		bothmodels_diffnum	15	14	15	14
172	IR09363	cobyric acid synthase	'Adenosyl cobyrinate a,c diamide + 4 H2O + 4 L-Glutamine + 4 ATP -> 4 L-Glutamate + 4 ADP + 4 Orthophosphate + Adenosyl cobyrinate hexaamide + 8 H+ '	G-->R association identical in iMO1056 and iJP829.		y	y	y	y		PP1677	PA1277	PP1677	PA1277	n	Porphyrin and chlorophyll metabolism		G-->R association identical in PAO and PPU	15	15	15	15
173	IR01832	Coproporphyrinogen:oxygen oxidoreductase(decarboxylating)	'Oxygen + 2 H+ + Coproporphyrinogen III -> 2 H2O + 2 CO2 + Protoporphyrinogen IX '	G-->R association identical in iMO1056 and iJP829.		y	y	y	y		PP0073	PA0024	PP0073	PA0024	n	Porphyrin and chlorophyll metabolism		G-->R association identical in PAO and PPU	15	15	15	15
174	IR03021	CTP: 2-C-Methyl-D-erythritol 4-phosphate cytidylyltransferase	'CTP + 2-C-Methyl-D-erythritol 4-phosphate + H+ -> 4-(Cytidine 5''-diphospho)-2-C-methyl-D-erythritol + Pyrophosphate '	G-->R association identical in iMO1056 and iJP829.		y	y	y	y		PP1614	PA3633	PP1614	PA3633	n	Biosynthesis of terpenoids and steroids		G-->R association identical in PAO and PPU	15	15	15	15
175	IR01933	CTP:3-deoxy-D-manno-octulosonate cytidylyltransferase	'3-Deoxy-D-manno-octulosonate + CTP -> CMP-3-deoxy-D-manno-octulosonate + Pyrophosphate '	G-->R association identical in iMO1056 and iJP829.		y	y	y	y		PP1902	PA2979	PP1902	PA2979	n	Lipopolysaccharide biosynthesis		G-->R association identical in PAO and PPU	15	15	15	15
176	IR08663	CYSabc	'L-Cysteine[e] + H2O + ATP -> ADP + L-Cysteine + Orthophosphate + H+ '	PP0225 --> PA5074 <--> PP5022 with 69% and 83% homology, respectively. Since ABC transporters generally have 3 components, and iMO1056 is missing an ATP binding component on the cysteine transporter, add PA5074 with "AND" relationship to iMO1056r.		y	y	y	y		( PP0226 and PP0227 and PP0225 )	PA0313, PA0314	(PP0226 and PP0227 and PP0225)	PA0313 and PA0314 and PA5074	n	Transport		bothmodels_diffnum	15	14	15	14
177	IR08596	CYTBO3	'2 Ubiquinol-8 + Oxygen + 5 H+ -> 5 H+[e] + 2 H2O + 2 Ubiquinone-8 '	Set the GPR of the reaction in iMO to "PA1317 and PA1318 and PA1319 and PA1320 and PA1321". Add the reaction to iJP with the following GPR: "PP0812 and PP0813 and PP0814 and PP0815 and PP0816". Reacprocals have the same position in the GPRs. Cytochrome oxidase bo3.		y	y	y	y		( ( PP1319 and PP1317 and PP1318 ) or ( PP0104 and PP0103 and PP0110 and PP0105 and PP0109 and PP0106 ) or ( PP0814 and PP0813 and PP0812 and PP0815 and PP0816 ) or ( PP4252 and PP4255 and PP4256 and PP4257 and PP4251 and PP4250 and PP4253 and PP4258 ) or ( PP4650 and PP4651 ) )	PA1317, PA1320, PA1318, PA1321, PA1319	PP0812 and PP0813 and PP0814 and PP0815 and PP0816	PA1317 and PA1318 and PA1319 and PA1320 and PA1321	n	Oxidative phosphorylation		other	14	15	14	15
178	IR00267	Cytidine-5'-monophosphate phosphohydrolase	'H2O + CMP -> Orthophosphate + Cytidine '	Keep as is. There are no matches in PAO1 to PP1414 and PP2531 (5' nucleotidases) from BLAST search in PSEUDOCAP, and the matches in our own BLAST search (PA3589 and PA3919) have unrelated annotations. Strangely, PP1414 and PP2531 have no homology for each other. Note, many enzymes for these reactions have broad specificity, so there might be other enzymes that can act as isozymes.		y	y	y	y		( PP1414 ) or ( PP1620 ) or ( PP2531 )	PA3625	(PP1414) or (PP1620) or (PP2531)	PA3625	n	Pyrimidine metabolism		bothmodels_diffnum	15	15	15	15
179	IR08699	cytosine transport in via proton symport	'H+[e] + Cytosine[e] -> Cytosine + H+ '	Associate (PA1419 or PA0438 or PA5099 or PA0443 or PA0476) and (PP0709 or PP3187 or PP3641 or PP3655 or PP4035 or PP4309 or PP4921) with #8699. Appears to be a real difference, with more (low confidence) genes in PPU than in PAO for cytosine transport. Associations based on annotated function (pseudocap)		y	y	y	y		PP3187	PA0443 or PA0438 or PA5099 or PA1419 or PA0476 or PA2073	(PP0709 or PP3187 or PP3641 or PP3655 or PP4035 or PP4309 or PP4921)	(PA1419 or PA0438 or PA5099 or PA0443 or PA0476)	n	Transport		transport	14	14	14	14
180	RR08702	D-alanine transport via proton symport	'D-Alanine[e] + H+[e] <=> D-Alanine + H+ '	associate with #8702/8703 (PA0789 or PA5097) and (PP1059 or PP5031). There are more related genes in both organisms, but it is unclear how specific any of their functions are, so it is hard to construe 'real differences' from this data.		y	y	y	y		PP4840	PA0789	PP1059 or PP5031	PA0789 or PA5097	n	Transport		transport	14	14	14	14
181	RR08885	D-alanine-D-alanine ligase	'2 D-Alanine + ATP <=> ADP + Orthophosphate + H+ + D-Alanyl-D-alanine '	Keep it as it is. PP1339<==>PA4410, PA4201 is similar to PP1339, PP4346 is completely different.		y	y	y	y		( PP1339 ) or ( PP4346 )	PA4410, PA4201	(PP1339) or (PP4346)	PA4410 or PA4201	n	D-Alanine metabolism		1modelnotreciprocal	15	15	15	15
182	RR03692	D-Arabinose-5-phosphate ketol-isomerase	'D-Arabinose 5-phosphate <=> D-Ribulose 5-phosphate '	G-->R association identical in iMO1056 and iJP829.		y	y	y	y		PP0957	PA4457	PP0957	PA4457	n	Pentose and glucuronate interconversions		G-->R association identical in PAO and PPU	15	15	15	15
183	IR01289	dCTP aminohydrolase	'dCTP + H2O + H+ -> dUTP + NH4+ '	G-->R association identical in iMO1056 and iJP829.		y	y	y	y		PP1100	PA3480	PP1100	PA3480	n	Pyrimidine metabolism		G-->R association identical in PAO and PPU	15	15	15	15
184	IR09630	Decanoyl-[acyl-carrier protein]:malonyl-[acyl-carrier-protein] C-acyltransferase	'Malonyl-[acyl-carrier protein] + Decanoyl-[acyl-carrier protein] + H+ -> 3-Oxododecanoyl-[acyl-carrier protein] + CO2 + acyl carrier protein '	Remove from iJP829 PP4545, PP4379, PP3533, and PP2795 because the first 2 are FabH (3-oxoacyl ACP synthase III), not FabB or FabF, and thus involved in initiation but not elongation of fatty acids, and the last 2 are not seemingly relevant to this reaction. Add to iJP829 PP2780 and PP2778 (both FabF), since both are annotated as 3-oxoacyl ACP synthase II and they have 30% and 28% homology to PA16…		y	y	y	y		( PP1916 ) or ( PP4545 ) or ( PP2795 ) or ( PP3553 ) or ( PP3303 ) or ( PP4379 ) or ( PP4175 )	PA1609	PP1916 or PP4175	PA1609	n	Fatty acid biosynthesis		bothmodels_diffnum	14	15	14	15
185	IR01996	D-erythro-1-(Imidazol-4-yl)glycerol 3-phosphate hydro-lyase	'D-erythro-1-(Imidazol-4-yl)glycerol 3-phosphate -> H2O + 3-(Imidazol-4-yl)-2-oxopropyl phosphate '	G-->R association identical in iMO1056 and iJP829.		y	y	y	y		PP0289	PA5143	PP0289	PA5143	n	Histidine metabolism		G-->R association identical in PAO and PPU	15	15	15	15
186	RR01016	D-Erythrose 4-phosphate + NAD+ + H2O <=> 4-Phospho-D-erythronate +NADH + H+	'H2O + D-Erythrose 4-phosphate + NAD+ <=> 4-Phospho-D-erythronate + 2 H+ + NADH '	G-->R association identical in iMO1056 and iJP829.		y	y	y	y		PP4964	PA0551	PP4964	PA0551	n	Vitamin B6 metabolism		G-->R association identical in PAO and PPU	15	15	15	15
187	IR08829	D-fructose transport via PEP:Pyr PTS	'D-Fructose[e] + Phosphoenolpyruvate -> Pyruvate + D-Fructose 1-phosphate '	PP0793 <--> PA3562 with 65% homology. Add PP0795 to iJP829, since both PP0795 and PA0793 have almost identical annotations, and are consistent with the reaction function (although putative).		y	y	y	y		PP0795	PA3560, PA3562	PP0793 and PP0795	PA3560 and PA3562	n	Transport		bothmodels_diffnum	14	15	14	15
188	IR00455	D-Fructose-1,6-bisphosphate 1-phosphohydrolase	'H2O + D-Fructose 1,6-bisphosphate -> Orthophosphate + D-Fructose 6-phosphate '	G-->R association identical in iMO1056 and iJP829.		y	y	y	y		PP5040	PA5110	PP5040	PA5110	n	Carbon fixation in photosynthetic organisms		G-->R association identical in PAO and PPU	15	15	15	15
189	RR00690	D-Fructose-1,6-bisphosphate D-glyceraldehyde-3-phosphate-lyase	'D-Fructose 1,6-bisphosphate <=> D-Glyceraldehyde 3-phosphate + Dihydroxyacetone phosphate '	G-->R association identical in iMO1056 and iJP829.		y	y	y	y		PP4960	PA0555	PP4960	PA0555	n	Carbon fixation in photosynthetic organisms		G-->R association identical in PAO and PPU	15	15	15	15
190	IR08758	D-gluconate transport via proton symport, reversible	'D-Gluconic acid[e] + H+[e] -> D-Gluconic acid + H+ '	PP0652 --> PA2322 <--> PP3417 with 59% and 81% homology, respectively. Add PA1051 (GntT) as isozyme to PA2322 in iMO1056r, since it matches 33% with PA2322 and has COG predicted function as a gluconate/H+ symporter and PPU has 2 isozymes as well.		y	y	y	y		( PP3417 ) or ( PP0652 )	PA2322	(PP3417) or (PP0652)	PA2322 or PA1051	n	Transport		bothmodels_diffnum	15	14	15	14
191	RR00464	D-Glucose-6-phosphate ketol-isomerase	'D-Glucose 6-phosphate <=> D-Fructose 6-phosphate '	PP1808 --> PA4732 <--> PP4701 with 80% and 80% homology, respectively. Keep as is. There is only 1 copy of PGI in PAO (confirmed by BLAST), but 2 in PPU.		y	y	y	y		( PP4701 ) or ( PP1808 )	PA4732	(PP4701) or (PP1808)	PA4732	n	Glycolysis / Gluconeogenesis		bothmodels_diffnum	15	15	15	15
192	RR00511	D-Glucose-6-phosphate:NADP+ 1-oxoreductase	'D-Glucose 6-phosphate + NADP+ <=> D-Glucono-1,5-lactone 6-phosphate + NADPH + H+ '	PP4042 --> PA5439 <--> PP5351 with 61% and 72% homology, respectively. Keep as is. There is no 3rd isozyme in PAO, but there is In PPU (annotation and BLAST search).		y	y	y	y		( PP4042 ) or ( PP1022 ) or ( PP5351 )	PA5439, PA3183	(PP4042) or (PP1022) or (PP5351)	PA5439 or PA3183	n	Pentose phosphate pathway		bothmodels_diffnum	15	15	15	15
193	RR00652	D-Glyceraldehyde-3-phosphate ketol-isomerase	'D-Glyceraldehyde 3-phosphate <=> Dihydroxyacetone phosphate '	G-->R association identical in iMO1056 and iJP829.		y	y	y	y		PP4715	PA4748	PP4715	PA4748	n	Glycolysis / Gluconeogenesis		G-->R association identical in PAO and PPU	15	15	15	15
194	RR00685	D-Glyceraldehyde-3-phosphate:NAD+ oxidoreductase(phosphorylating)	'D-Glyceraldehyde 3-phosphate + Orthophosphate + NAD+ <=> 1,3-Bisphospho-D-glycerate + H+ + NADH '	G-->R association identical in iMO1056 and iJP829.		y	y	y	y		PP1009	PA3195	PP1009	PA3195	n	Glycolysis / Gluconeogenesis		G-->R association identical in PAO and PPU	15	15	15	15
195	RR03641	D-Glycerate:NADP+ 2-oxidoreductase	'D-Glycerate + NAD+ <=> H+ + Hydroxypyruvate + NADH '	PP4300 <--> PA1499 with 78% homology. Add PA1499 as an isozyme to iMO1056, since it is highly similar to the putative hydroxypyruvate reductase, PP4300 (hydroxypyruvate reductase = glycerate dehydrogenase = 1.1.1.29).		y	y	y	y		( PP4300 ) or ( PP0762 )	PA4626	(PP4300) or (PP0762)	PA4626 or PA1499	n	Glycine, serine and threonine metabolism		bothmodels_diffnum	15	14	15	14
196	IR04297	DHPPDA2	'H2O + 2,5-Diamino-6-hydroxy-4-(5''-phosphoribosylamino)-pyrimidine + H+ -> 5-Amino-6-(5''-phosphoribosylamino)uracil + NH4+ '	G-->R association identical in iMO1056 and iJP829.		y	y	y	y		PP0514	PA4056	PP0514	PA4056	n	Riboflavin metabolism		G-->R association identical in PAO and PPU	15	15	15	15
197	IR00904	Dimethylallyl-diphosphate:isopentenyl-diphosphatedimethylallyltranstransferase	'Dimethylallyl diphosphate + Isopentenyl diphosphate -> Pyrophosphate + Geranyl diphosphate '	G-->R association identical in iMO1056 and iJP829.		y	y	y	y		PP0528	PA4043	PP0528	PA4043	n	Biosynthesis of terpenoids and steroids		G-->R association identical in PAO and PPU	15	15	15	15
198	RR01014	D-Mannose 6-phosphate 1,6-phosphomutase	'D-Mannose 6-phosphate <=> D-Mannose 1-phosphate '	Keep it as it is. PA5322<==>PP5288.		y	y	y	y		( PP1777 ) or ( PP5288 )	PA5322	(PP1777) or (PP5288)	PA5322	n	Fructose and mannose metabolism		1modelnotreciprocal	15	15	15	15
199	RR00465	D-Mannose-6-phosphate ketol-isomerase	'D-Mannose 6-phosphate <=> D-Fructose 6-phosphate '	Remove PP4860 from the GPR of the reaction in iJP - the evidence is to weak. KEGG assigns it to the KO of mannose-6-phosphate isomerase and pseudomonas.com says that it is putative, but motifs and blast point to N-acylglucosamine-2-epimerase. /modification/ fixed gene associations 10/24/2009		y	y	y	y		( PP4860 ) or ( PP1277 )	PA3551, PA5452	PP1277	PA3551 or PA5452	n	Fructose and mannose metabolism		1modelnotreciprocal	14	15	14	15
200	IR09624	Dodecanoyl-[acyl-carrier-protein]:malonyl-[acyl-carrier-protein] C-acyltransferase	'Malonyl-[acyl-carrier protein] + Dodecanoyl-ACP (n-C12:0ACP) + H+ -> 3-Oxotetradecanoyl-[acyl-carrier protein] + CO2 + acyl carrier protein '	Remove from iJP829 PP4545, PP4379, PP3533, and PP2795 because the first 2 are FabH (3-oxoacyl ACP synthase III), not FabB or FabF, and thus involved in initiation but not elongation of fatty acids, and the last 2 are not seemingly relevant to this reaction. Add to iJP829 PP2780 and PP2778 (both FabF), since both are annotated as 3-oxoacyl ACP synthase II and they have 30% and 28% homology to PA16…		y	y	y	y		( PP1916 ) or ( PP4545 ) or ( PP2795 ) or ( PP3553 ) or ( PP3303 ) or ( PP4379 ) or ( PP4175 )	PA1609	PP1916 or PP4175	PA1609	n	Fatty acid biosynthesis		bothmodels_diffnum	14	15	14	15
201	RR00681	D-Ribose-5-phosphate ketol-isomerase	'D-Ribose 5-phosphate <=> D-Ribulose 5-phosphate '	G-->R association identical in iMO1056 and iJP829.		y	y	y	y		PP5150	PA0330	PP5150	PA0330	n	Pentose phosphate pathway		G-->R association identical in PAO and PPU	15	15	15	15
202	RR03691	D-Ribulose-5-phosphate 3-epimerase	'D-Ribulose 5-phosphate <=> D-Xylulose 5-phosphate '	G-->R association identical in iMO1056 and iJP829.		y	y	y	y		PP0415	PA0607	PP0415	PA0607	n	Pentose phosphate pathway		G-->R association identical in PAO and PPU	15	15	15	15
203	IR03486	dTDPglucose <=> 4,6-Dideoxy-4-oxo-dTDP-D-glucose + H2O	'dTDPglucose -> H2O + 4,6-Dideoxy-4-oxo-dTDP-D-glucose '	G-->R association identical in iMO1056 and iJP829.		y	y	y	y		PP1785	PA5161	PP1785	PA5161	n	Streptomycin biosynthesis		G-->R association identical in PAO and PPU	15	15	15	15
204	IR01159	dUMP + H2O <=> Deoxyuridine + Orthophosphate	'H2O + dUMP -> Orthophosphate + Deoxyuridine '	Keep as is. There are no matches in PAO1 to PP1414 and PP2531 (5' nucleotidases) from BLAST search in PSEUDOCAP, and the matches in our own BLAST search (PA3589 and PA3919) have unrelated annotations. Strangely, PP1414 and PP2531 have no homology for each other. Note, many enzymes for these reactions have broad specificity, so there might be other enzymes that can act as isozymes.		y	y	y	y		( PP1414 ) or ( PP1620 ) or ( PP2531 )	PA3625	(PP1414) or (PP1620) or (PP2531)	PA3625	n	Pyrimidine metabolism		bothmodels_diffnum	15	15	15	15
205	IR01157	dUTP nucleotidohydrolase	'H2O + dUTP -> Pyrophosphate + dUMP + H+ '	G-->R association identical in iMO1056 and iJP829.		y	y	y	y		PP5286	PA5321	PP5286	PA5321	n	Pyrimidine metabolism		G-->R association identical in PAO and PPU	15	15	15	15
206	IR00444	Ethanolamine ammonia-lyase	'Ethanolamine -> Acetaldehyde + NH4+ '	G-->R association identical in iMO1056 and iJP829.		y	y	y	y		( PP0542 and PP0543 )	PA4025, PA4024	(PP0542 and PP0543)	PA4025 or PA4024	n	Glycerophospholipid metabolism		G-->R association identical in PAO and PPU	15	15	15	15
207	IR00275	Formate:NAD+ oxidoreductase	'Formate + NAD+ -> CO2 + NADH '	Keep as is. This appears to be a real difference. It is not clear how many subunits are necessary for function, though.		y	y	y	y		( ( PP0490 and PP0491 ) or ( PP2186 and PP2185 and PP2184 and PP2183 ) )	PA4810+PA4811+PA4812	((PP0490 and PP0491) or (PP2186 and PP2185 and PP2184 and PP2183))	PA4810 and PA4811 and PA4812	n	Glyoxylate and dicarboxylate metabolism		amino acid catabolism	15	15	15	15
208	IR08910	fructose-1-phosphate kinase	'D-Fructose 1-phosphate + ATP -> ADP + H+ + D-Fructose 1,6-bisphosphate '	G-->R association identical in iMO1056 and iJP829.		y	y	y	y		PP0794	PA3561	PP0794	PA3561	n	Fructose and mannose metabolism		G-->R association identical in PAO and PPU	15	15	15	15
209	IR03577	gamma-L-Glutamyl-L-cysteine:glycine ligase (ADP-forming)	'Glycine + gamma-L-Glutamyl-L-cysteine + ATP -> ADP + Glutathione + Orthophosphate + H+ '	G-->R association identical in iMO1056 and iJP829.		y	y	y	y		PP4993	PA0407	PP4993	PA0407	n	Alanine, aspartate and glutamate metabolism		G-->R association identical in PAO and PPU	15	15	15	15
210	IR08911	GAR transformylase-T	'Formate + ATP + 5''-Phosphoribosylglycinamide -> ADP + Orthophosphate + H+ + 5''-Phosphoribosyl-N-formylglycinamide '	Remove PA0836 from the GPR of the reaction in IMO. PA0836 is acetate kinase. /modification/ fixed gene associations 10/24/2009		y	y	y	y		PP1457	PA3751, PA0836	PP1457	PA3751	n	Purine metabolism		1modelnotreciprocal	15	14	15	14
211	RR00546	GDP:D-mannose-1-phosphate guanylyltransferase	'GDP + D-Mannose 1-phosphate + H+ <=> Orthophosphate + GDPmannose '	remove PP4860 from and add PP1776 to iJP829r. PP1776 is 67% and 65% similar (BLASTn) to PA5452 and PA2232 respectively, and there is no second gene in PPU that is related to PP1776 (aside from PP1277, with 44%p identity). PA3551 and PP1277 are a reciprocal match (83%n). The final gene association is PAO: (PA5452 or PA2232 or PA3551), PPU: (PP1776 or PP1277). /modification/ fixed gene associations…		y	y	y	y		( PP1776 ) or ( PP1277 )	PA2232, PA3551, PA5452	PP1776 or PP1227	PA5452 or PA2232 or PA3551	n	Fructose and mannose metabolism		bothmodels_diffnum	14	15	14	15
212	IR00548	GDPmannose 4,6-hydro-lyase	'GDPmannose -> H2O + GDP-4-dehydro-6-deoxy-D-mannose '	G-->R association identical in iMO1056 and iJP829.		y	y	y	y		PP1799	PA5453	PP1799	PA5453	n	Fructose and mannose metabolism		G-->R association identical in PAO and PPU	15	15	15	15
213	IR01104	Geranyl-diphosphate:isopentenyl-diphosphate geranyltrans-transferase	'Geranyl diphosphate + Isopentenyl diphosphate -> Pyrophosphate + trans,trans-Farnesyl diphosphate '	G-->R association identical in iMO1056 and iJP829.		y	y	y	y		PP0528	PA4043	PP0528	PA4043	n	Biosynthesis of terpenoids and steroids		G-->R association identical in PAO and PPU	15	15	15	15
214	IR08747	GLUabc	'L-Glutamate[e] + H2O + ATP -> L-Glutamate + ADP + Orthophosphate + H+ '	Keep #8747 in both models, with the following associations: (PA1342 and PA1340 and PA1341 and PA1339) and (PP1071 and PP1069 and PP1070 and PP1068), based on KEGG functional annotation. There are other possible proteins, but they are low confidence. These genes correspond to (GltI and GltK and GltJ and GltL), and they are all reciprocal matches to their respective PA-PP partner.		y	y	y	y		( PP1070 and PP1069 and PP1071 and PP1068 )	PA1339+PA1341+PA1342+PA1340, PA4192+PA4195+PA4194, PA1260+PA1257+PA1256+PA1258	(PP1071 and PP1069 and PP1070 and PP1068)	(PA1342 and PA1340 and PA1341 and PA1339)	n	Transport		transport	15	14	15	14
215	IR09306	Gluconate dehydrogenase (membrane)	'D-Gluconic acid[e] + NADP+ -> 2-Dehydro-D-gluconate[e] + NADPH + H+ '	PP3382 <--> PA2266 with 76% homology. PA2266 is adjacent to PA2264 and PA2265 (gluconate dehydrogenase proteins), and is most similar to PP3382 which is also adjacent to the other gluconate dehydrogenase proteins in PPU. Therefore, add PA2266 with 'and' logic to iMO1056r.		y	y	y	y		( PP3382 and PP3384 and PP3383 )	PA2264+PA2265	(PP3382 and PP3384 and PP3383)	PA2264 and PA2265 and PA2266	n	Glycolysis / Gluconeogenesis		bothmodels_diffnum	15	14	15	14
216	IR09592	Glucose ABC transport	'D-Glucose[e] + H2O + ATP -> ADP + D-Glucose + Orthophosphate + H+ '	Keep #9592 in both models, with (PA3187 and (PA3188 or PA3189) and PA3190) and (PP1018 and (PP1017 or PP1016) and PP1015) associated (these genes match with 82%, 83%, 82%, and 66% identity respectively).		y	y	y	y		( PP1018 and PP1016 and PP1017 )	PA3189, PA3187, PA3190, PA3188	(PP1018 and (PP1017 or PP1016) and PP1015)	(PA3187 and (PA3188 or PA3189) and PA3190)	n	Transport		transport	14	15	14	15
217	IR09304	Glucose dehydrogenase (membrane)	'D-Glucose[e] + NADP+ -> 1,5-Gluconolactone[e] + NADPH + H+ '	G-->R association identical in iMO1056 and iJP829.		y	y	y	y		PP1444	PA2290	PP1444	PA2290	n	Pentose phosphate pathway		G-->R association identical in PAO and PPU	15	15	15	15
218	RR04305	glutamate dehydrogenase (NADP)	'L-Glutamate + H2O + NADP+ <=> NH4+ + 2-Oxoglutarate + NADPH + H+ '	G-->R association identical in iMO1056 and iJP829.		y	y	y	y		PP0675	PA4588	PP0675	PA4588	n	Alanine, aspartate and glutamate metabolism		G-->R association identical in PAO and PPU	15	15	15	15
219	IR04285	glutamyl-tRNA reductase	'L-Glutamyl-tRNA(Glu) + NADPH + H+ -> (S)-4-Amino-5-oxopentanoate + NADP+ + tRNA (Glu) '	G-->R association identical in iMO1056 and iJP829.		y	y	y	y		PP0732	PA4666	PP0732	PA4666	n	Porphyrin and chlorophyll metabolism		G-->R association identical in PAO and PPU	15	15	15	15
220	IR04284	Glutamyl-tRNA synthetase	'L-Glutamate + ATP + tRNA (Glu) -> L-Glutamyl-tRNA(Glu) + Pyrophosphate + AMP '	G-->R association identical in iMO1056 and iJP829.		y	y	y	y		( PP4694 ) or ( PP1977 )	PA3134, PA4724	(PP4694) or (PP1977)	PA3134 or PA4724	n	Alanine, aspartate and glutamate metabolism		G-->R association identical in PAO and PPU	15	15	15	15
221	IR01420	Glutaryl-CoA:(acceptor) 2,3-oxidoreductase (decarboxylating)	'FAD + Glutaryl-CoA + H+ -> CO2 + Crotonoyl-CoA + FADH2 '	G-->R association identical in iMO1056 and iJP829.		y	y	y	y		PP0158	PA0447	PP0158	PA0447	n	Fatty acid metabolism		G-->R association identical in PAO and PPU	15	15	15	15
222	IR08641	GLYBabc	'Betaine[e] + H2O + ATP -> ADP + Orthophosphate + H+ + Betaine '	PROLBabc, GBBTNabc, CRNabc, GLYBabc, PROabc, and CHLabc (ABC transporters for proline betaine, gamma-butyrobetaine, carnitine, glycine-betaine, proline, and choline) should be associated with (ProV+ProW+ProX), and PROabc, GLYBabc, and CHLabc also with (OpuBA+OpuBB+OpuBC) as well, according to TCDB (ProVWX = 3.A.1.12.1, OpuBABC = 3.A.1.12.3 and 3.A.1.12.8). Therefore, gene associations should be a…		y	y	y	y		( ( PP0296 and PP0295 and PP0294 ) or ( PP2775 and PP2774 ) or ( PP3559 ) or ( PP0869 and PP0870 and PP0871 and PP0868 ) )	PA5378, PA3889, PA3888, PA3891, PA5376, PA5377, PA3890, PA0030, PA5094, PA5095, PA5378, PA3889, PA3891, PA5376, PA5377, PA3890	((PP2774 or PP0294) and (PP3559 or PP0295 or PP2774) and (PP3558 or PP2775 or PP0296 or PP0304 or PP1741 or PP0076)) or (PP0868 and (PP0869 or PP0871) and PP0870)	((PA5094 or PA5376) and (PA5095 or PA5377) and (PA5103 or PA5096 or PA3236 or PA5378 or PA0030 or PA5388)) or (PA3891 and (PA3890 or PA3888) and PA3889)	n	Transport		bothmodels_diffnum	14	14	14	14
223	IR04311	glycogen phosphorylase	'Glycogen + Orthophosphate -> D-Glucose 1-phosphate '	G-->R association identical in iMO1056 and iJP829.		y	y	y	y		PP5041	PA2144	PP5041	PA2144	n	Insulin signaling pathway		G-->R association identical in PAO and PPU	15	15	15	15
224	IR04310	glycogen synthase (ADPGlc)	'ADPglucose -> ADP + Glycogen + H+ '	G-->R association identical in iMO1056 and iJP829.		y	y	y	y		PP4050	PA2165	PP4050	PA2165	n	Starch and sucrose metabolism		G-->R association identical in PAO and PPU	15	15	15	15
225	IR00009	Glyoxylate carboxy-lyase (dimerizing)	'2 Glyoxylate + H+ -> CO2 + 2-Hydroxy-3-oxopropanoate '	I don't see any difference here. PA1502 <==>PP4297		y	y	y	y		PP4297	PA1502	PP4297	PA1502	n	Glyoxylate and dicarboxylate metabolism		1modelnotreciprocal	15	15	15	15
226	IR04295	GTP cyclohydrolase II (25drapp)	'3 H2O + GTP -> Pyrophosphate + 2,5-Diamino-6-hydroxy-4-(5''-phosphoribosylamino)-pyrimidine + Formate + 2 H+ '	PP3813 --> PA4054 <--> PP0516 with 73% and 84% homology, respectively. Keep as is. There are 3 isozymes for GTP cyclohydrolase II in PPU, but only 2 in PAO. Confirmed with BLAST search in PAO.		y	y	y	y		( PP3813 ) or ( PP0522 ) or ( PP0516 )	PA4054, PA4047	(PP3813) or (PP0522) or (PP0516)	PA4054 or PA4047	n	Riboflavin metabolism		bothmodels_diffnum	15	15	15	15
227	IR00777	Guanosine 5'-monophosphate phosphohydrolase	'H2O + GMP -> Orthophosphate + Guanosine '	Keep as is. There are no matches in PAO1 to PP1414 and PP2531 (5' nucleotidases) from BLAST search in PSEUDOCAP, and the matches in our own BLAST search (PA3589 and PA3919) have unrelated annotations. Strangely, PP1414 and PP2531 have no homology for each other. Note, many enzymes for these reactions have broad specificity, so there might be other enzymes that can act as isozymes.		y	y	y	y		( PP1414 ) or ( PP1620 ) or ( PP2531 )	PA3625	(PP1414) or (PP1620) or (PP2531)	PA3625	n	Purine metabolism		bothmodels_diffnum	15	15	15	15
228	IR09684	Hexadecanoyl-[acyl-carrier-protein]:malonyl-[acyl-carrier-protein] C-acyltransferase	'Malonyl-[acyl-carrier protein] + Palmitoyl-ACP (n-C16:0ACP) + H+ -> CO2 + acyl carrier protein + 3-Oxooctadecanoyl-[acyl-carrier protein] '	Remove from iJP829 PP4545, PP4379, PP3533, and PP2795 because the first 2 are FabH (3-oxoacyl ACP synthase III), not FabB or FabF, and thus involved in initiation but not elongation of fatty acids, and the last 2 are not seemingly relevant to this reaction. Add to iJP829 PP2780 and PP2778 (both FabF), since both are annotated as 3-oxoacyl ACP synthase II and they have 30% and 28% homology to PA16…		y	y	y	y		( PP1916 ) or ( PP4545 ) or ( PP2795 ) or ( PP3553 ) or ( PP3303 ) or ( PP4379 ) or ( PP4175 )	PA1609	PP1916 or PP4175	PA1609	n	Fatty acid biosynthesis		bothmodels_diffnum	14	15	14	15
229	IR09620	Hexanoyl-[acyl-carrier protein]:malonyl-[acyl-carrier-protein] C-acyltransferase	'Hexanoyl-[acyl-carrier protein] + Malonyl-[acyl-carrier protein] + H+ -> 3-Oxooctanoyl-[acyl-carrier protein] + CO2 + acyl carrier protein '	Remove from iJP829 PP4545, PP4379, PP3533, and PP2795 because the first 2 are FabH (3-oxoacyl ACP synthase III), not FabB or FabF, and thus involved in initiation but not elongation of fatty acids, and the last 2 are not seemingly relevant to this reaction. Add to iJP829 PP2780 and PP2778 (both FabF), since both are annotated as 3-oxoacyl ACP synthase II and they have 30% and 28% homology to PA16…		y	y	y	y		( PP1916 ) or ( PP4545 ) or ( PP2795 ) or ( PP3553 ) or ( PP3303 ) or ( PP4379 ) or ( PP4175 )	PA1609	PP1916 or PP4175	PA1609	n	Fatty acid biosynthesis		bothmodels_diffnum	14	15	14	15
230	IR01443	Homogentisate:oxygen 1,2-oxidoreductase (decyclizing)	'Oxygen + Homogentisate -> 4-Maleylacetoacetate + H+ '	G-->R association identical in iMO1056 and iJP829.		y	y	y	y		PP4621	PA2009	PP4621	PA2009	n	Tyrosine metabolism		G-->R association identical in PAO and PPU	15	15	15	15
231	RR00989	Homoserine O-acetyltransferase	'Acetyl-CoA + L-Homoserine <=> O-Acetyl-L-homoserine + CoA '	G-->R association identical in iMO1056 and iJP829.		y	y	y	y		PP5097	PA0390	PP5097	PA0390	n	Cysteine and methionine metabolism		G-->R association identical in PAO and PPU	15	15	15	15
232	IR00006	Hydorogen-peroxide:hydrogen-peroxide oxidoreductase	'2 H2O2 -> 2 H2O + Oxygen '	Keep it as it is, PP0115<==>PA2147, PP0481<==>PA4236.		y	y	y	y		( PP2887 ) or ( PP0115 ) or ( PP0481 ) or ( PP3668 )	PA4613, PA2147, PA4236	(PP2887) or (PP0115) or (PP0481) or (PP3668)	PA4613 or PA2147 or PA4236	n	Not assigned		1modelnotreciprocal	15	15	15	15
233	RR00529	Hydrogen-sulfide:NADP+ oxidoreductase	'3 H2O + 3 NADP+ + Hydrogen sulfide <=> Sulfite + 3 NADPH + 5 H+ '	Set the GPR of the reaction in iMO to be "PA1838 and PA4513 or PA4130 and PA4513". There are two beta subunits and one alpha. PA1838 <==>PP2371 PA4513<==>PP0860, PA4130 is very similar to PP2371. PA2906 is some precorrin synthase.		y	y	y	y		( PP0860 and PP2371 )	PA1838, PA2906, PA4130	(PP0860 and PP2371)	PA1838 and PA4513 or PA4130 and PA4513	n	Sulfur metabolism		1modelnotreciprocal	15	14	15	14
234	IR08915	Hydroxybenzoate octaprenyltransferase	'all-trans-Octaprenyl diphosphate + 4-Hydroxybenzoate -> Pyrophosphate + 3-Octaprenyl-4-hydroxybenzoate '	G-->R association identical in iMO1056 and iJP829.		y	y	y	y		PP5318	PA5358	PP5318	PA5358	n	Ubiquinone and other terpenoid-quinone biosynthesis		G-->R association identical in PAO and PPU	15	15	15	15
235	IR01792	Hydroxymethylbilane hydro-lyase(cyclizing)	'Hydroxymethylbilane -> H2O + Uroporphyrinogen III '	G-->R association identical in iMO1056 and iJP829.		y	y	y	y		PP0187	PA5259	PP0187	PA5259	n	Porphyrin and chlorophyll metabolism		G-->R association identical in PAO and PPU	15	15	15	15
236	IR08767	ILEabc	'L-Isoleucine[e] + H2O + ATP -> ADP + Orthophosphate + L-Isoleucine + H+ '	Keep #8767 in iJP and iMO with the following genes: ((PA1070 or PA1071 or PA4861 or PA4862 or PA4909 or PA4910) and (PA1072 or PA1073 or PA4859 or PA4860 or PA4911 or PA4912) and (PA1074 or PA4913)) & ((PP1137 or PP1138 or PP4844 or PP4845 or PP4863 or PP4864) and (PP1139 or PP1140 or PP4842 or PP4843 or PP4865 or PP4866) and (PP1141 or PP4867)). These genes are all reciprocal matches, and I've i…		y	y	y	y		( ( PP1141 and PP1140 and PP1139 and PP1138 and PP1137 ) or ( PP2749 and PP2753 and PP2750 and PP2748 ) or ( PP4866 and PP4863 and PP4867 and PP4865 and PP4864 ) or ( PP0619 and PP0617 and PP0616 and PP0618 and PP0615 ) or ( PP2769 and PP2767 and PP2768 ) )	PA1070, PA1071, PA1072, PA1074, PA1073, PA4910, PA4913, PA4912, PA4911, PA4909, PA4859, PA4860, PA4861, PA4862	((PP1137 or PP1138 or PP4844 or PP4845 or PP4863 or PP4864) and (PP1139 or PP1140 or PP4842 or PP4843 or PP4865 or PP4866) and (PP1141 or PP4867))	((PA1070 or PA1071 or PA4861 or PA4862 or PA4909 or PA4910) and (PA1072 or PA1073 or PA4859 or PA4860 or PA4911 or PA4912) and (PA1074 or PA4913))	n	Transport		transport	14	15	14	15
237	IR03590	IMP:L-aspartate ligase (GDP-forming)	'IMP + L-Aspartate + GTP -> GDP + N6-(1,2-Dicarboxyethyl)-AMP + Orthophosphate + 2 H+ '	G-->R association identical in iMO1056 and iJP829.		y	y	y	y		PP4889	PA4938	PP4889	PA4938	n	Purine metabolism		G-->R association identical in PAO and PPU	15	15	15	15
238	IR03586	IMP:NAD+ oxidoreductase	'H2O + IMP + NAD+ -> H+ + Xanthosine 5''-phosphate + NADH '	G-->R association identical in iMO1056 and iJP829.		y	y	y	y		PP1031	PA3770	PP1031	PA3770	n	Purine metabolism		G-->R association identical in PAO and PPU	15	15	15	15
239	IR03583	Inosine 5'-monophosphate phosphohydrolase	'H2O + IMP -> Orthophosphate + Inosine '	Keep as is. There are no matches in PAO1 to PP1414 and PP2531 (5' nucleotidases) from BLAST search in PSEUDOCAP, and the matches in our own BLAST search (PA3589 and PA3919) have unrelated annotations. Strangely, PP1414 and PP2531 have no homology for each other. Note, many enzymes for these reactions have broad specificity, so there might be other enzymes that can act as isozymes.		y	y	y	y		( PP1414 ) or ( PP1620 ) or ( PP2531 )	PA3625	(PP1414) or (PP1620) or (PP2531)	PA3625	n	Purine metabolism		bothmodels_diffnum	15	15	15	15
240	IR00244	Isocitrate glyoxylate-lyase	'Isocitrate -> Glyoxylate + Succinate '	PP1024 <--> PA3181 with 70% homology. Remove PP1024 from iJP829, it doesn't appear to have isocitrate lyase function.		y	y	y	y		( PP4116 ) or ( PP1024 )	PA2634	PP4116	PA2634	n	Glyoxylate and dicarboxylate metabolism		bothmodels_diffnum	14	15	14	15
241	RR00131	Isocitrate:NADP+ oxidoreductase (decarboxylating)	'Isocitrate + NADP+ <=> CO2 + 2-Oxoglutarate + NADPH '	PP4012 <--> PA2624 with 74% homology. Add PA2624 to iMO1056r and make logic into 'OR' relationship in both models. PP4011 and PA4012 are respectively prokaryotic (homodimeric) and monomeric type isocitrate dehydrogenases, each of which can act without the other.		y	y	y	y		( PP4012 and PP4011 )	PA2623	(PP4012 and PP4011)	PA2623 or PA2624	n	Glutathione metabolism		bothmodels_diffnum	15	14	15	14
242	IR08920	ketol-acid reductoisomerase (2-Aceto-2-hydroxybutanoate)	'(S)-2-Aceto-2-hydroxybutanoate + NADPH + H+ -> (R)-2,3-Dihydroxy-3-methylpentanoate + NADP+ '	G-->R association identical in iMO1056 and iJP829.		y	y	y	y		PP4678	PA4694	PP4678	PA4694	n	Valine, leucine and isoleucine biosynthesis		G-->R association identical in PAO and PPU	15	15	15	15
243	RR00214	L-Alanine racemase	'L-Alanine <=> D-Alanine '	add to iMO1056 PA5302-->DadX as isozyme.		y	y	y	y		( PP3722 ) or ( PP5269 )	PA4930	(PP3722) or (PP5269)	PA4930 or PA5302	n	Alanine, aspartate and glutamate metabolism		bothmodels_diffnum	15	14	15	14
244	RR00124	L-Alanine:2-oxoglutarate aminotransferase	'L-Alanine + 2-Oxoglutarate <=> L-Glutamate + Pyruvate '	Set PP1872 as the GPR of the reaction in iJP, the gene assigne currently in this model is wrong.		y	y	y	y		PP0214	PA2828	PP1872	PA2828	n	Alanine, aspartate and glutamate metabolism		1modelnotreciprocal	15	15	15	15
245	IR00307	L-Arginine carboxy-lyase	'L-Arginine + H+ -> CO2 + Agmatine '	keep (PA4839 or PA1818) in iMO1056r (remove PA4519), and keep only PP0567 in iJP829r. PA4839 <--> PP0567 with 84% homology, and they are both annotated as 'arginine decarboxylase'. PA4519 is ornithine decarboxylase (hence its removal), and PA1818 is a probable orn/arg/lys decarboxylase (according to PSEUDOCAP annotation) that has no homolog in PPU (BLAST search confirmed). This is a real differen…		y	y	y	y		PP0567	PA4519, PA1818, PA4839	PP0567	(PA4839 or PA1818)	n	Arginine and proline metabolism		bothmodels_diffnum	15	14	15	14
246	IR00250	L-Asparagine amidohydrolase	'L-Asparagine + H2O -> NH4+ + L-Aspartate '	PP1160 --> PA2162 <--> PP4053 with 55% and 63% homology, respectively. Keep as is. It appears that PP1160 has no homolog in PAO with the asparaginase function, but rather that its PAO homologues have glycosyl hydrolase function.		y	y	y	y		( PP2453 ) or ( PP0495 ) or ( PP1160 )	PA1337, PA2253	(PP2453) or (PP0495) or (PP1160)	PA1337 or PA2253	n	Alanine, aspartate and glutamate metabolism		bothmodels_diffnum	15	15	15	15
247	IR00246	L-Aspartate + Oxygen <=> Iminoaspartate + H2O2	'Oxygen + L-Aspartate -> Iminoaspartate + H2O2 '	G-->R association identical in iMO1056 and iJP829.		y	y	y	y		PP1426	PA0761	PP1426	PA0761	n	Nicotinate and nicotinamide metabolism		G-->R association identical in PAO and PPU	15	15	15	15
248	IR00255	L-Aspartate ammonia-lyase	'L-Aspartate -> NH4+ + Fumarate '	G-->R association identical in iMO1056 and iJP829.		y	y	y	y		PP5338	PA5429	PP5338	PA5429	n	Alanine, aspartate and glutamate metabolism		G-->R association identical in PAO and PPU	15	15	15	15
249	IR00318	L-Aspartate:L-glutamine amido-ligase (AMP-forming)	'H2O + L-Aspartate + L-Glutamine + ATP -> L-Asparagine + L-Glutamate + Pyrophosphate + AMP + H+ '	Remove PA0051 from the GPR of the reaction in iMO. It looks to be some quorum sensing related gene (10.1128/JB.183.21.6454-6465.2001). Leave the rest as it is, PA3459 <==> PP1750 /modification/ (10/19/2009) This reaction should be present there was some mistake.		y	y	y	y		PP1750	PA0051, PA2084, PA3459	PP1750	PA3459 or PA2084	n	Alanine, aspartate and glutamate metabolism		1modelnotreciprocal	15	14	15	14
250	IR03823	L-Aspartate-4-semialdehyde hydro-lyase (adding pyruvate andcyclizing)	'L-Aspartate 4-semialdehyde + Pyruvate -> 2 H2O + 2,3-Dihydrodipicolinate + H+ '	Keep it as it is. PP1237 <==> PA1010, PP2036 <==>PA0223, PA1254 and PA4188 are very similar to PP2036. PP1257 is still dihydropicolinate synthase, but not similar to any of PAO genes.		y	y	y	y		( PP1257 ) or ( PP2036 ) or ( PP1237 )	PA0223, PA1254, PA4188, PA1010	(PP1257) or (PP2036) or (PP1237)	PA0223 or PA1254 or PA4188 or PA1010	n	Lysine biosynthesis		1modelnotreciprocal	15	15	15	15
251	RR03822	L-Aspartate-4-semialdehyde:NADP+ oxidoreductase (phosphorylating)	'L-Aspartate 4-semialdehyde + Orthophosphate + NADP+ <=> 4-Phospho-L-aspartate + NADPH + H+ '	G-->R association identical in iMO1056 and iJP829.		y	y	y	y		( PP1992 ) or ( PP1989 )	PA3116, PA3117	(PP1992) or (PP1989)	PA3116 or PA3117	n	Glycine, serine and threonine metabolism		G-->R association identical in PAO and PPU	15	15	15	15
252	IR03797	L-Citrulline:L-aspartate ligase (AMP-forming)	'L-Aspartate + ATP + L-Citrulline -> Pyrophosphate + AMP + H+ + N-(L-Arginino)succinate '	G-->R association identical in iMO1056 and iJP829.		y	y	y	y		PP1088	PA3525	PP1088	PA3525	n	Urea cycle and metabolism of amino groups		G-->R association identical in PAO and PPU	15	15	15	15
253	IR05024	L-Cystathionine Lysteine-lyase (deaminating) (R)	'L-Cysteine + NH4+ + 2-Oxobutanoate -> L-Cystathionine + H2O '	G-->R association identical in iMO1056 and iJP829.		y	y	y	y		PP4594	PA0400	PP4594	PA0400	n	Glycine, serine and threonine metabolism		G-->R association identical in PAO and PPU	15	15	15	15
254	IR08771	LEUabc	'L-Leucine[e] + H2O + ATP -> ADP + Orthophosphate + H+ + L-Leucine '	Keep #8771 in iJP and iMO with the following genes: ((PA1070 or PA1071 or PA4861 or PA4862 or PA4909 or PA4910) and (PA1072 or PA1073 or PA4859 or PA4860 or PA4911 or PA4912) and (PA1074 or PA4913)) & ((PP1137 or PP1138 or PP4844 or PP4845 or PP4863 or PP4864) and (PP1139 or PP1140 or PP4842 or PP4843 or PP4865 or PP4866) and (PP1141 or PP4867)). These genes are all reciprocal matches, and I've i…		y	y	y	y		( ( PP1141 and PP1140 and PP1139 and PP1138 and PP1137 ) or ( PP2749 and PP2753 and PP2750 and PP2748 ) or ( PP4866 and PP4863 and PP4867 and PP4865 and PP4864 ) or ( PP0619 and PP0617 and PP0616 and PP0618 and PP0615 ) or ( PP2769 and PP2767 and PP2768 ) )	PA4910, PA4913, PA4912, PA4911, PA4909, PA1070, PA1071, PA1072, PA1074, PA1073, PA4859, PA4860, PA4861, PA4862	((PP1137 or PP1138 or PP4844 or PP4845 or PP4863 or PP4864) and (PP1139 or PP1140 or PP4842 or PP4843 or PP4865 or PP4866) and (PP1141 or PP4867))	((PA1070 or PA1071 or PA4861 or PA4862 or PA4909 or PA4910) and (PA1072 or PA1073 or PA4859 or PA4860 or PA4911 or PA4912) and (PA1074 or PA4913))	n	Transport		transport	14	15	14	15
255	IR00116	L-Glutamate 5-semialdehyde:NAD+ oxidoreductase	'H2O + L-Glutamate 5-semialdehyde + NAD+ -> L-Glutamate + 2 H+ + NADH '	G-->R association identical in iMO1056 and iJP829.		y	y	y	y		PP4947	PA0782	PP4947	PA0782	n	Arginine and proline metabolism		G-->R association identical in PAO and PPU	15	15	15	15
256	RR00126	L-Glutamate racemase	'L-Glutamate <=> D-Glutamate '	G-->R association identical in iMO1056 and iJP829.		y	y	y	y		PP0736	PA4662	PP0736	PA4662	n	Alanine, aspartate and glutamate metabolism		G-->R association identical in PAO and PPU	15	15	15	15
257	IR00120	L-Glutamate:ammonia ligase (ADP-forming)	'L-Glutamate + NH4+ + ATP -> ADP + Orthophosphate + L-Glutamine + H+ '	Add PP4399 as isozyme to iJP829. PA3356 <--> PP4399 with 79% homology in nucleotide BLAST, and both are putative glutamine synthetases.		y	y	y	y		( PP5184 ) or ( PP5046 ) or ( PP5183 ) or ( PP5299 ) or ( PP4547 ) or ( PP3148 )	PA5119 or PA0298 or PA5508 or PA0296 or PA3356 or PA2040 or PA5522	(PP5184) or (PP5046) or (PP5183) or (PP5299) or (PP4547) or (PP3148) or PP4399	PA5119 or PA0298 or PA5508 or PA0296 or PA3356 or PA2040 or PA5522	n	Alanine, aspartate and glutamate metabolism		bothmodels_diffnum	14	15	14	15
258	IR00552	L-Glutamate:L-cysteine gamma-ligase (ADP-forming)	'L-Glutamate + L-Cysteine + ATP -> ADP + gamma-L-Glutamyl-L-cysteine + Orthophosphate + H+ '	G-->R association identical in iMO1056 and iJP829.		y	y	y	y		PP0243	PA5203	PP0243	PA5203	n	Alanine, aspartate and glutamate metabolism		G-->R association identical in PAO and PPU	15	15	15	15
259	IR04458	L-Glutamate:NADP+ oxidoreductase (transaminating) (R)	'2-Oxoglutarate + NADPH + L-Glutamine + H+ -> 2 L-Glutamate + NADP+ '	The GPR of iJP should sound PP5075 and PP5076. PP4037 is a putative small chain of this enzyme complex. It has also a reciprocal in PAO (PA0440)		y	y	y	y		( ( PP5076 and PP5075 ) or ( PP4037 ) )	PA5036, PA5035	(PP5075 and PP5076)	PA5036 or PA5035	n	Alanine, aspartate and glutamate metabolism		1modelnotreciprocal	14	15	14	15
260	IR00461	L-Glutamine:D-fructose-6-phosphate aminotransferase (hexoseisomerizing)	'L-Glutamine + D-Fructose 6-phosphate -> L-Glutamate + D-Glucosamine 6-phosphate '	G-->R association identical in iMO1056 and iJP829.		y	y	y	y		PP5409	PA5549	PP5409	PA5549	n	Alanine, aspartate and glutamate metabolism		G-->R association identical in PAO and PPU	15	15	15	15
261	IR08754	L-histidine transport via ABC system	'L-Histidine[e] + H2O + ATP -> ADP + Orthophosphate + H+ + L-Histidine '	Change associations for #8754: ((PA2923 or PA0888) and (PA2924 or PA2925 or PA0890 or PA0889) and (PA2926 or PA0982)) and (PP4486 and (PP4484 or PP4485) and PP4486). This is a real difference, but it could be false. Many genes exist that are possible histidine transporters.		y	y	y	y		( PP4486 and PP4485 and PP4484 and PP4483 )	PA1260 and PA1257 and PA1256 and PA1258 or PA2923 or PA2026 or PA2924 or PA2925	(PP4486 and (PP4484 or PP4485) and PP4486)	((PA2923 or PA0888) and (PA2924 or PA2925 or PA0890 or PA0889) and (PA2926 or PA0982))	n	Transport		transport	15	14	15	14
262	IR03610	L-Histidinol:NAD+ oxidoreductase	'H2O + L-Histidinol + 2 NAD+ -> 3 H+ + L-Histidine + 2 NADH '	G-->R association identical in iMO1056 and iJP829.		y	y	y	y		PP0966	PA4448	PP0966	PA4448	n	Histidine metabolism		G-->R association identical in PAO and PPU	15	15	15	15
263	RR01210	L-Isoleucine:2-oxoglutarate aminotransferase	'2-Oxoglutarate + L-Isoleucine <=> L-Glutamate + (S)-3-Methyl-2-oxopentanoate '	Keep as is. Note, these genes are not reciprocal, but they do have the same annotated function (IlvE).		y	y	y	y		PP3511	PA5013	PP3511	PA5013	n	Valine, leucine and isoleucine degradation		amino acid catabolism	15	15	15	15
264	RR01583	LL-2,6-Diaminoheptanedioate 2-epimerase	'LL-2,6-Diaminoheptanedioate <=> meso-2,6-Diaminoheptanedioate '	PP3790 --> PA4977 --> PP1394 <--> PA1417, with 55%, 63%, and 64% homology, respectively. Keep as is. PA4977, PP1394, and PA1417 have unrelated functions. BLAST confirms that in the PAO1 genome, only PA5278 is similar to either P3790 or PP5228. Therefore, there are 2 isozymes in PPU but only 1 in PAO.		y	y	y	y		( PP5228 ) or ( PP3790 )	PA5278	(PP5228) or (PP3790)	PA5278	n	Lysine biosynthesis		bothmodels_diffnum	15	15	15	15
265	RR00708	L-Leucine:NAD+ oxidoreductase(deaminating)	'H2O + L-Leucine + NAD+ <=> 4-Methyl-2-oxopentanoate + NH4+ + H+ + NADH '	G-->R association identical in iMO1056 and iJP829.		y	y	y	y		PP4617	PA3418	PP4617	PA3418	n	Valine, leucine and isoleucine degradation		G-->R association identical in PAO and PPU	15	15	15	15
266	IR08755	L-lysine transport via ABC system	'L-Lysine[e] + H2O + ATP -> ADP + L-Lysine + Orthophosphate + H+ '	Keep #8755 in both models with (PP4493 and (PP4484 or PP4486) and PP4486) and (PA0892 and (PA0890 or PA0889) and PA0888) associated. This is a general amino acid transporter. Not sure if there are others too.		y	y	y	y		( PP4486 and PP4485 and PP4484 and PP4483 )	PA1260+PA1257+PA1256+PA1258, PA1256, PA5074, PA1258, PA1260, PA1257	(PP4493 and (PP4484 or PP4486) and PP4486)	(PA0892 and (PA0890 or PA0889) and PA0888)	n	Transport		transport	14	14	14	14
267	IR04615	L-Malate glyoxylate-lyase (CoA-acetylating) (R)	'H2O + Acetyl-CoA + Glyoxylate -> (S)-Malate + H+ + CoA '	G-->R association identical in iMO1056 and iJP829.		y	y	y	y		PP0356	PA0482	PP0356	PA0482	n	Pyruvate metabolism		G-->R association identical in PAO and PPU	15	15	15	15
268	IR00322	L-O-Phosphoserine phosphohydrolase	'O-Phospho-L-serine + H2O -> L-Serine + Orthophosphate '	G-->R association identical in iMO1056 and iJP829.		y	y	y	y		PP4909	PA4960	PP4909	PA4960	n	Glycine, serine and threonine metabolism		G-->R association identical in PAO and PPU	15	15	15	15
269	IR01001	L-Phenylalanine,tetrahydrobiopterin:oxygen oxidoreductase(4-hydroxylating)	'L-Phenylalanine + Oxygen + Tetrahydrobiopterin -> H2O + L-Tyrosine + Dihydrobiopterin '	G-->R association identical in iMO1056 and iJP829.		y	y	y	y		PP4490	PA0872	PP4490	PA0872	n	Phenylalanine, tyrosine and tryptophan biosynthesis		G-->R association identical in PAO and PPU	15	15	15	15
270	RR00397	L-Phenylalanine:2-oxoglutarate aminotransferase	'L-Phenylalanine + 2-Oxoglutarate <=> Phenylpyruvate + L-Glutamate '	The GPR of this reaction should sound in iMO: "PA2531 or PA3165 or PA4447 or PA0870 or PA3139", in iJP "PP1972 or PP3590 or PP0967". PA3139 <==> PP1972, PA0870 <==>PP3590 (interferred by high similarity to PP1972), PA0967 <==>PP4447		y	y	y	y		( PP3721 ) or ( PP1972 ) or ( PP0858 ) or ( PP0967 ) or ( PP4692 ) or ( PP1872 ) or ( PP3590 )	PA0870, PA3139	PP1972 or PP3590 or PP0967	PA2531 or PA3165 or PA4447 or PA0870 or PA3139	n	Phenylalanine metabolism		1modelnotreciprocal	14	14	14	14
271	IR08823	L-proline transport via ABC system	'L-Proline[e] + H2O + ATP -> ADP + L-Proline + Orthophosphate + H+ '	PROLBabc, GBBTNabc, CRNabc, GLYBabc, PROabc, and CHLabc (ABC transporters for proline betaine, gamma-butyrobetaine, carnitine, glycine-betaine, proline, and choline) should be associated with (ProV+ProW+ProX), and PROabc, GLYBabc, and CHLabc also with (OpuBA+OpuBB+OpuBC) as well, according to TCDB (ProVWX = 3.A.1.12.1, OpuBABC = 3.A.1.12.3 and 3.A.1.12.8). Therefore, gene associations should be a…		y	y	y	y		( ( PP0296 and PP0295 and PP0294 ) or ( PP2775 and PP2774 ) or ( PP3559 ) or ( PP0869 and PP0870 and PP0871 and PP0868 ) )	PA0030, PA5094, PA5095, PA5378, PA3889, PA3891, PA5376, PA5377, PA3890	((PP2774 or PP0294) and (PP3559 or PP0295 or PP2774) and (PP3558 or PP2775 or PP0296 or PP0304 or PP1741 or PP0076)) or (PP0868 and (PP0869 or PP0871) and PP0870)	((PA5094 or PA5376) and (PA5095 or PA5377) and (PA5103 or PA5096 or PA3236 or PA5378 or PA0030 or PA5388)) or (PA3891 and (PA3890 or PA3888) and PA3889)	n	Transport		bothmodels_diffnum	14	14	14	14
272	IR03538	L-serine ammonia-lyase	'L-Serine -> Pyruvate + NH4+ '	Keep #3538 in both models, with (PA5379 or PA2443 or PA0331 or PA0851 or PA1326 or PA2683) and (PP0297 or PP0987 or PP3144 or PP3191 or PP3446 or PP4430 or PP5149 or PP2930) associated. There seem to be more isozymes in PPU. These are all the genes in both organisms that mention EC# 4.3.1.17 or 4.3.1.19 in the pseudocap annotation, and most are associated in KEGG as well. KEGG entry on EC#4.3.1.1…		y	y	y	y		( PP0987 ) or ( PP3144 ) or ( PP3191 ) or ( PP4430 ) or ( PP5149 ) or ( PP0297 ) or ( PP3446 )	PA5379, PA2443	(PP0297 or PP0987 or PP3144 or PP3191 or PP3446 or PP4430 or PP5149 or PP2930)	(PA5379 or PA2443 or PA0331 or PA0851 or PA1326 or PA2683)	n	Glycine, serine and threonine metabolism		amino acid catabolism	14	14	14	14
273	RR00446	L-Threonine acetaldehyde-lyase	'L-Threonine <=> Acetaldehyde + Glycine '	Keep the genes that are in iMO1056r and iJP829r so far. This is a real difference, verified by finding no other BLAST matches for PA5413 in PPU except for PP0321. PA0902 is putative. Also, this enzyme (4.1.2.5) catalyzes tobin# 3255/7632, L-allothreonine acetaldehyde lyase, as well. ALSO, associate (with OR logic) PA5415, PA4602, and PA2444 (GlyA1, 2, and 3) with this reaction in iMO1056, and PP0…		y	y	y	y		PP0321	PA5413, PA0902	PP0321 or PP0671 or PP0322	PA5413 or PA0902 or PA5415 or PA4602 or PA2444	n	Glycine, serine and threonine metabolism		bothmodels_diffnum	14	14	14	14
274	IR00642	L-threonine ammonia-lyase	'L-Threonine -> NH4+ + 2-Oxobutanoate '	Remove PA2443 and PA5379 from the GPR of iMO (they in theory could catalyze this reaction, but with very low rate). The final GPR for iMOshould sound "PA0331 or PA 0852 or PA1326 or PA2683". It's hard to say which are reciprtocals of which as they are all very similar. /modification/ fixed gene associations 10/24/2009		y	y	y	y		( PP3191 ) or ( PP4430 ) or ( PP5149 ) or ( PP3446 )	PA1326, PA2443, PA1326, PA5379, PA0331, PA0331, PA2683, PA2683	(PP3191) or (PP4430) or (PP5149) or (PP3446)	PA0331 or PA0852 or PA1326 or PA2683	n	Glycine, serine and threonine metabolism		1modelnotreciprocal	15	14	15	14
275	RR00432	L-Tyrosine:2-oxoglutarate aminotransferase	'L-Tyrosine + 2-Oxoglutarate <=> L-Glutamate + 3-(4-Hydroxyphenyl)pyruvate '	The GPR of this reaction should sound in iMO: "PA2531 or PA3165 or PA4447 or PA0870 or PA3139", in iJP "PP1972 or PP3590 or PP0967". PA3139 <==> PP1972, PA0870 <==>PP3590 (interferred by high similarity to PP1972), PA0967 <==>PP4447		y	y	y	y		( PP1972 ) or ( PP3590 )	PA2897, PA2032, PA4132, PA3798, PA3659, PA4722, PA2828	PP1972 or PP3590 or PP0967	PA2531 or PA3165 or PA4447 or PA0870 or PA3139	n	Tyrosine metabolism		1modelnotreciprocal	14	14	14	14
276	RR03658	L-Valine:NAD+ oxidoreductase(deaminating)	'H2O + L-Valine + NAD+ <=> NH4+ + H+ + 3-Methyl-2-oxobutanoate + NADH '	G-->R association identical in iMO1056 and iJP829.		y	y	y	y		PP4617	PA3418	PP4617	PA3418	n	Valine, leucine and isoleucine biosynthesis		G-->R association identical in PAO and PPU	15	15	15	15
277	RR04316	MCOATA	'Malonyl-CoA + acyl carrier protein <=> Malonyl-[acyl-carrier protein] + CoA '	G-->R association identical in iMO1056 and iJP829.		y	y	y	y		PP1913	PA2968	PP1913	PA2968	n	Fatty acid biosynthesis		G-->R association identical in PAO and PPU	15	15	15	15
278	IR03570	meso-2,6-Diaminoheptanedioate carboxy-lyase	'meso-2,6-Diaminoheptanedioate + H+ -> L-Lysine + CO2 '	PP2077 --> PA5277 <--> PP5227 with 58% and 82% homology, respectively. There is no homolog in PAO1 to PA5277, and both PP2077 and PP5266 are similar to PA5277 (and have 'diaminopimelate decarboxylase' in annotation). Keep as is.		y	y	y	y		( PP2077 ) or ( PP5227 )	PA5277	(PP2077) or (PP5227)	PA5277	n	Lysine biosynthesis		bothmodels_diffnum	15	15	15	15
279	IR04052	N-(5'-Phospho-D-ribosylformimino)-5-amino-1-(5''-phospho-D-ribosyl)-4-imidazolecarboxamide ketol-isomerase	'5-(5-Phospho-D-ribosylaminoformimino)-1-(5-phosphoribosyl)-imidazole-4-carboxamide -> N-(5''-Phospho-D-1''-ribulosylformimino)-5-amino-1-(5''''-phospho-D-ribosyl)-4-imidazolecarboxamide '	G-->R association identical in iMO1056 and iJP829.		y	y	y	y		PP0292	PA5141	PP0292	PA5141	n	Histidine metabolism		G-->R association identical in PAO and PPU	15	15	15	15
280	RR00706	N-(L-Argininosuccinate) arginie-lyase	'N-(L-Arginino)succinate <=> L-Arginine + Fumarate '	G-->R association identical in iMO1056 and iJP829.		y	y	y	y		PP0184	PA5263	PP0184	PA5263	n	Urea cycle and metabolism of amino groups		G-->R association identical in PAO and PPU	15	15	15	15
281	IR01869	N-[(R)-4'-Phosphopantothenoyl]-L-cysteine carboxy-lyase	'(R)-4''-Phosphopantothenoyl-L-cysteine + H+ -> CO2 + Pantetheine 4''-phosphate '	G-->R association identical in iMO1056 and iJP829.		y	y	y	y		PP5285	PA5320	PP5285	PA5320	n	Pantothenate and CoA biosynthesis		G-->R association identical in PAO and PPU	15	15	15	15
282	RR01272	N2-Acetyl-L-ornithine:2-oxoglutarate aminotransferase	'N2-Acetyl-L-ornithine + 2-Oxoglutarate <=> L-Glutamate + N-Acetyl-L-glutamate 5-semialdehyde '	Add PA0530 as an isozyme to the GPR of the reaction in iMO.		y	y	y	y		( PP4481 ) or ( PP0372 )	PA0895	(PP4481) or (PP0372)	PA0895 or PA0530	n	Urea cycle and metabolism of amino groups		1modelnotreciprocal	15	14	15	14
283	RR01271	N2-Acetyl-L-ornithine:L-glutamate N-acetyltransferase	'N2-Acetyl-L-ornithine + L-Glutamate <=> L-Ornithine + N-Acetyl-L-glutamate '	G-->R association identical in iMO1056 and iJP829.		y	y	y	y		PP1346	PA4402	PP1346	PA4402	n	Urea cycle and metabolism of amino groups		G-->R association identical in PAO and PPU	15	15	15	15
284	IR00222	N2-Succinyl-L-glutamate + H2O <=> L-Glutamate + Succinate	'H2O + N2-Succinyl-L-glutamate -> L-Glutamate + Succinate '	G-->R association identical in iMO1056 and iJP829.		y	y	y	y		PP4475	PA0901	PP4475	PA0901	n	Arginine and proline metabolism		G-->R association identical in PAO and PPU	15	15	15	15
285	RR00704	N6-(1,2-Dicarboxyethyl)AMP AMP-lyase	'N6-(1,2-Dicarboxyethyl)-AMP <=> Fumarate + AMP '	Keep as is. This appears to be a true difference between PPU and PAO, based on BLAST searches (no other good matches came up in PPU, except PP1379 which has a different function) and annotation (PurB). This is catalyzed by the same genes as for ADSL1R, according to Expasy entry for 4.3.2.2.		y	y	y	y		PP4016	PA3516, PA3517, PA2629	PP4016	PA3516 or PA3517 or PA2629	n	Purine metabolism		bothmodels_diffnum	15	15	15	15
286	RR01988	N-Acetyl-L-glutamate-5-semialdehyde:NADP+ 5-oxidoreductase(phosphrylating)	'Orthophosphate + N-Acetyl-L-glutamate 5-semialdehyde + NADP+ <=> N-Acetyl-L-glutamate 5-phosphate + NADPH + H+ '	Keep it as it is. PP0432 <==> PA0662		y	y	y	y		( PP3633 ) or ( PP0432 )	PA0662	(PP3633) or (PP0432)	PA0662	n	Urea cycle and metabolism of amino groups		1modelnotreciprocal	15	15	15	15
287	IR02286	N-Acetylmuramoyl-Ala amidohydrolase	'H2O + N-Acetylmuramoyl-Ala -> N-Acetyl-D-muramoate + L-Alanine '	Add PA5538 as an isozyme to the GPR of the reaction in iMO. Remove PP0130 from the GPR in iJP. There is a group of genes (PP0130, PA5485 and PA0807), which are very similar to those assigned to this reaction, but they seem to take part in (at least in PAO) cephalosporin resistance (doi:10.1128/AAC.50.5.1780-1787.2006)		y	y	y	y		( PP4897 ) or ( PP0130 )	PA4947	PP4897	PA4947 or PA5538	n	Peptidoglycan biosynthesis		1modelnotreciprocal	14	14	14	14
288	RR00082	NADPH:oxidized-glutathione oxidoreductase	'2 Glutathione + NADP+ <=> Oxidized glutathione + NADPH + H+ '	G-->R association identical in iMO1056 and iJP829.		y	y	y	y		PP3819	PA2025	PP3819	PA2025	n	Alanine, aspartate and glutamate metabolism		G-->R association identical in PAO and PPU	15	15	15	15
289	RR08678	NH3t	'NH4+[e] <=> NH4+ '	Associate (PA3039 or PA5287) and (PP2106 or PP5233) with #8678/8679. PA3039 <--> PP2106 with 79% identity (BLASTn) and PA5287 <--> PP5233 with 84% identity (BLASTn).		y	y	y	y		PP5233	PA5287 or PA3039 or PA5287	PP2106 or PP5233	PA5287 or PA3039	n	Transport		transport	14	14	14	14
290	IR02308	Nicotinate-nucleotide:dimethylbenzimidazolephospho-D-ribosyltransferase	'Nicotinate D-ribonucleotide + Dimethylbenzimidazole -> H+ + Nicotinate + N1-(5-Phospho-alpha-D-ribosyl)-5,6-dimethylbenzimidazole '	G-->R association identical in iMO1056 and iJP829.		y	y	y	y		PP1679	PA1279	PP1679	PA1279	n	Riboflavin metabolism		G-->R association identical in PAO and PPU	15	15	15	15
291	IR06307	Nicotinate-nucleotide:pyrophosphate phosphoribosyltransferase(carboxylating) (R)	'5-Phospho-alpha-D-ribose 1-diphosphate + Pyridine-2,3-dicarboxylate + 2 H+ -> Nicotinate D-ribonucleotide + Pyrophosphate + CO2 '	G-->R association identical in iMO1056 and iJP829.		y	y	y	y		PP0787	PA4524	PP0787	PA4524	n	Nicotinate and nicotinamide metabolism		G-->R association identical in PAO and PPU	15	15	15	15
292	IR09733	Nitrate ABC transport	'Nitrate[e] + H2O + ATP -> ADP + Orthophosphate + Nitrate + H+ '	Keep #9733 in both models with ((PA2328 or PA2296) and (PA2327 or PA2295) and (PA2329 or PA2294)) and ((PP0207 or PP3636) and (PP0208 or PP3635) and (PP0209 or PP3637)) associated. These 6 genes each have >74% homology between putida and aeruginosa.		y	y	y	y		PP0207	PA2327, PA2328, PA2329	((PP0207 or PP3636) and (PP0208 or PP3635) and (PP0209 or PP3637))	((PA2328 or PA2296) and (PA2327 or PA2295) and (PA2329 or PA2294))	n	Transport		transport	14	14	14	14
293	RR04012	N-Succinyl-L-2,6-diaminoheptanedioate:2-ocoglytarateamino-transferase	'2-Oxoglutarate + N-Succinyl-LL-2,6-diaminoheptanedioate <=> L-Glutamate + N-Succinyl-2-L-amino-6-oxoheptanedioate '	G-->R association identical in iMO1056 and iJP829.		y	y	y	y		PP1588	PA3659	PP1588	PA3659	n	Lysine biosynthesis		G-->R association identical in PAO and PPU	15	15	15	15
294	IR01582	N-Succinyl-LL-2,6-diaminoheptanedioate amidohydrolase	'H2O + N-Succinyl-LL-2,6-diaminoheptanedioate -> LL-2,6-Diaminoheptanedioate + Succinate '	G-->R association identical in iMO1056 and iJP829.		y	y	y	y		PP1525	PA1162	PP1525	PA1162	n	Lysine biosynthesis		G-->R association identical in PAO and PPU	15	15	15	15
295	IR04366	NTRIR2x	'Nitrite + 5 H+ + 3 NADH -> 2 H2O + NH4+ + 3 NAD+ '	Keep it as it is. While PP1705<==>PA1781, PP1706 and PA1780 differ from each other, yet being functionally the same.		y	y	y	y		( PP1706 and PP1705 )	PA1781, PA1780	(PP1706 and PP1705)	PA1781 or PA1780	n	Nitrogen metabolism		1modelnotreciprocal	15	15	15	15
296	IR00555	O3-Acetyl-L-serine acetate-lyase (adding hydrogen sulfide)	'O-Acetyl-L-serine + Hydrogen sulfide -> Acetate + L-Cysteine + H+ '	Keep as is. PA2104 has no homolog in PPU. It is annotated as probable cysteine synthase, based on homology with cysteine synthase from spinacia oleracea. A BLAST search in NCBI showed that PP2104 holds homology with many cysteine synthases from many species. It is still questionable to me whether PA2104 truly has this function, but since it isn't at all existent in PPU, it seems to be a differenc…		y	y	y	y		( PP4571 ) or ( PP1654 )	PA2709, PA2104, PA0932	(PP4571) or (PP1654)	PA2709 or PA2104 or PA0932	n	Cysteine and methionine metabolism		bothmodels_diffnum	15	15	15	15
297	IR09650	Octanoyl-[acyl-carrier protein]:malonyl-[acyl-carrier-protein] C-acyltransferase (decarboxylating)	'Malonyl-[acyl-carrier protein] + Octanoyl-[acyl-carrier protein] + H+ -> 3-oxodecanoyl-ACP + CO2 + acyl carrier protein '	Remove from iJP829 PP4545, PP4379, PP3533, and PP2795 because the first 2 are FabH (3-oxoacyl ACP synthase III), not FabB or FabF, and thus involved in initiation but not elongation of fatty acids, and the last 2 are not seemingly relevant to this reaction. Add to iJP829 PP2780 and PP2778 (both FabF), since both are annotated as 3-oxoacyl ACP synthase II and they have 30% and 28% homology to PA16…		y	y	y	y		( PP1916 ) or ( PP4545 ) or ( PP2795 ) or ( PP3553 ) or ( PP3303 ) or ( PP4379 ) or ( PP4175 )	PA1609	PP1916 or PP4175	PA1609	n	Fatty acid biosynthesis		bothmodels_diffnum	14	15	14	15
298	IR02630	O-Phospho-4-hydroxy-L-threonine phospho-lyase (adding water)	'H2O + O-Phospho-4-hydroxy-L-threonine -> Orthophosphate + 4-Hydroxy-L-threonine '	PP0662 --> PA3735 <--> PP1471 with 64% and 85% homology, respectively. There is no homolog to PP0662 or PA3735 in PAO, except for PA3735 itself. Therefore, keep as is.		y	y	y	y		( PP0662 ) or ( PP1471 )	PA3735	(PP0662) or (PP1471)	PA3735	n	Vitamin B6 metabolism		bothmodels_diffnum	15	15	15	15
299	RR02629	O-Phospho-4-hydroxy-L-threonine:2-oxoglutarate aminotransferase	'2-Oxoglutarate + O-Phospho-4-hydroxy-L-threonine <=> L-Glutamate + 2-Oxo-3-hydroxy-4-phosphobutanoate '	G-->R association identical in iMO1056 and iJP829.		y	y	y	y		PP1768	PA3167	PP1768	PA3167	n	Vitamin B6 metabolism		G-->R association identical in PAO and PPU	15	15	15	15
300	IR00890	O-Phospho-L-homoserine phospho-lyase (adding water)	'H2O + O-Phospho-L-homoserine -> Orthophosphate + L-Threonine '	PP0662 --> PA3735 <--> PP1471 with 64% and 85% homology, respectively. Keep as is. BLAST confirms 2 isozymes in PPU but only 1 enzyme in PAO for this reaction.		y	y	y	y		( PP0662 ) or ( PP1471 )	PA3735	(PP0662) or (PP1471)	PA3735	n	Glycine, serine and threonine metabolism		bothmodels_diffnum	15	15	15	15
301	IR08934	Ornithine Decarboxylase	'L-Ornithine + H+ -> Putrescine + CO2 '	keep as is. There is no homolog in PPU for PA1818 (probable orn/arg/lys decarboxylase), as confirmed by BLAST. The best BLAST match for PP0864 in PPU is PP5227 (diaminopimelate decarboxylase), with 27%.		y	y	y	y		PP0864	PA4519, PA1818	PP0864	PA4519 or PA1818	n	Urea cycle and metabolism of amino groups		bothmodels_diffnum	15	15	15	15
302	IR08752	ornithine transport via ABC system	'L-Ornithine[e] + H2O + ATP -> L-Ornithine + ADP + Orthophosphate + H+ '	Keep #8752 in both organisms. Redo associations: (PA0888 and (PA0889 or PA0890) and PA0892) and (PP4486 and (PP4485 or PP4484) and PP4483), based on annotated function (and roles in ATP transport: (ornithine binding, permease component, ATP binding). These 4 genes in PAO are reciprocally matched to the PPU genes with 73%, 79%, 83%, and 86% identity respectively.		y	y	y	y		( PP4486 and PP4485 and PP4484 and PP4483 )	PA0888, PA0890, PA0889, PA0892, PA1260+PA1257+PA1256+PA1258	(PP4486 and (PP4485 or PP4484))	(PA0888 and (PA0889 or PA0890) and PA0892)	n	Transport		transport	14	14	14	14
303	IR00616	Orotidine-5'-phosphate carboxy-lyase	'Orotidine 5''-phosphate + H+ -> UMP + CO2 '	G-->R association identical in iMO1056 and iJP829.		y	y	y	y		PP1815	PA2876	PP1815	PA2876	n	Pyrimidine metabolism		G-->R association identical in PAO and PPU	15	15	15	15
304	RR01048	Orotidine-5'-phosphate:pyrophosphate phosphoribosyltransferase	'Orotidine 5''-phosphate + Pyrophosphate <=> 5-Phospho-alpha-D-ribose 1-diphosphate + Orotate '	G-->R association identical in iMO1056 and iJP829.		y	y	y	y		PP5291	PA5331	PP5291	PA5331	n	Pyrimidine metabolism		G-->R association identical in PAO and PPU	15	15	15	15
305	IR04559	Orthophosphate:oxaloacetate carboxyl-lyase (phosphorylating) (R)	'H2O + CO2 + Phosphoenolpyruvate -> Oxaloacetate + Orthophosphate + H+ '	G-->R association identical in iMO1056 and iJP829.		y	y	y	y		PP1505	PA3687	PP1505	PA3687	n	Pyruvate metabolism		G-->R association identical in PAO and PPU	15	15	15	15
306	IR03535	Oxaloacetate carboxy-lyase	'Oxaloacetate + H+ -> Pyruvate + CO2 '	Remove all associated genes, and instead associate PA4872 / PP1389. PA4872 is from Narayanan et al, and PP1389 has 77%n identity with PA4872 so was assumed to have the same function. PA5435/PP5346 are subunit A of the oadABG protein complex, and won't function without the other two subunits (which BLAST searches confirmed as absent in both PAO and PPU) (see Dahinden et al). PP1505 is PEP carboxyl…		y	y	y	y		( PP5346 ) or ( PP1505 )	PA5435	PP1389	PA4872	n	Pyruvate metabolism		bothmodels_diffnum	14	14	14	14
307	RR00812	Palmitate:CoA ligase (AMP-forming)	'Palmitate + ATP + CoA <=> Pyrophosphate + Palmitoyl-CoA + AMP '	Add #812/5119 to iJP with (iMO) ((PA1288 or PA4589) and (PA3299 or PA3300)) and (iJP) (PP1689 and (PP4549 or PP4550)) associated. These correspond to FadL and FadD. Real difference, since there are 2 FadL's in PAO and only 1 in PPU (according to annotation). Note, these genes can operate on many different acyl chain lengthed fatty acids.		y	y	y	y		( PP4549 ) or ( PP3458 ) or ( PP4550 )	PA3299 or PA4589 or PA3300 or PA4589 or PA3300 or PA1288 or PA3299 or PA1288	(PP1689 and (PP4549 or PP4550))	((PA1288 or PA4589) and (PA3299 or PA3300))	n	Fatty acid metabolism		transport	14	14	14	14
308	RR08812	phosphate reversible transport via symport	'H+[e] + Orthophosphate[e] <=> Orthophosphate + H+ '	Keep as is. This is a real difference, since there is no strong homolog for PA5207 in PPU. PA5207 --> PP2092 <--> PA1783 with 55% and 82% identity (BLASTn).		y	y	y	y		( PP1373 ) or ( PP4103 )	PA0450, PA5207, PA4292	(PP1373) or (PP4103)	PA0450 or PA5207 or PA4292	n	Transport		transport	15	15	15	15
309	IR08824	phosphate transport via ABC system	'Orthophosphate[e] + H2O + ATP -> ADP + 2 Orthophosphate + H+ '	Keep #8824 in iMO and iJP. iMO gene association can stay the same. iJP gene association should change to the following: (PP5326 and PP5327 and PP5328 and PP5329) (which is identical to iMO association). This is based on annotated function and TCDB description of the pstSCAB genes.		y	y	y	y		( ( PP3845 ) or ( PP0414 and PP0412 and PP0411 and PP0413 ) or ( PP5341 ) or ( PP5181 and PP5177 and PP5178 and PP5180 and PP5179 ) )	PA5367, PA5368, PA5369, PA5366	(PP5326 and PP5327 and PP5328 and PP5329)	PA5367 and PA5368 and PA5369 and PA5366	n	Transport		transport	14	15	14	15
310	RR01999	Phosphoenolpyruvate:3-phosphoshikimate5-O-(1-carboxyvinyl)-transferase	'Shikimate 3-phosphate + Phosphoenolpyruvate <=> 5-O-(1-Carboxyvinyl)-3-phosphoshikimate + Orthophosphate '	G-->R association identical in iMO1056 and iJP829.		y	y	y	y		PP1770	PA3164	PP1770	PA3164	n	Phenylalanine, tyrosine and tryptophan biosynthesis		G-->R association identical in PAO and PPU	15	15	15	15
311	IR01017	Phosphoenolpyruvate:D-erythrose-4-phosphateC-(1-carboxyvinyl)transferase (phosphate hydrolysing,2-carboxy-2-oxoethyl-forming)	'H2O + D-Erythrose 4-phosphate + Phosphoenolpyruvate -> Orthophosphate + 2-Dehydro-3-deoxy-D-arabino-heptonate 7-phosphate '	PP1866 <--> PA2843 with 83% homology. Add PA2843 (AroG) to iMO1056r, since it has the putative function 2.5.1.54 from TIGR annotation in PSEUDOCAP, and is similar to PP1866 which also has that annotation.		y	y	y	y		( PP1866 ) or ( PP2324 ) or ( PP3080 )	PA2943, PA1750	(PP1866) or (PP2324) or (PP3080)	PA2943 or PA1750 or PA2843	n	Phenylalanine, tyrosine and tryptophan biosynthesis		bothmodels_diffnum	15	14	15	14
312	RR08939	phosphoglucomutase	'D-Glucose 1-phosphate <=> D-Glucose 6-phosphate '	Remove PA5131 from the GPR of the reaction in iMO, it is phosphoGLYCERATE mutase, PP5288 <==>PA5322. /modification/ (10/20/2009) This reaction should be present there was some mistake.		y	y	y	y		( PP1777 ) or ( PP3578 ) or ( PP5288 )	PA5322, PA5131	(PP1777) or (PP3578) or (PP5288)	PA5322	n	Streptomycin biosynthesis		1modelnotreciprocal	15	14	15	14
313	IR09315	phosphoribosylaminoimidazole carboxylase (ATP-dependent)	'Aminoimidazole ribotide + H2O + CO2 + ATP -> ADP + Orthophosphate + 2 H+ + 1-(5-Phospho-D-ribosyl)-5-amino-4-imidazolecarboxylate '	Sett the GPR of the reaction in iJP to be: "PA5425 and PA5426". This enzyme has ATPase and catalytic subunits. PA5425<==>PP5335, PA5426<==>PP5336		y	y	y	y		( PP5335 and PP5336 )	PA5425	(PP5335 and PP5336)	PA5425 and PA5426	n	Purine metabolism		1modelnotreciprocal	15	14	15	14
314	IR02265	Phosphoribosyl-AMP 1,6-hydrolase	'H2O + Phosphoribosyl-AMP -> 4 H+ + 5-(5-Phospho-D-ribosylaminoformimino)-1-(5-phosphoribosyl)-imidazole-4-carboxamide '	G-->R association identical in iMO1056 and iJP829.		y	y	y	y		PP5014	PA5066	PP5014	PA5066	n	Histidine metabolism		G-->R association identical in PAO and PPU	15	15	15	15
315	IR02264	Phosphoribosyl-ATP pyrophosphohydrolase	'H2O + Phosphoribosyl-ATP + 3 H+ -> Pyrophosphate + Phosphoribosyl-AMP '	G-->R association identical in iMO1056 and iJP829.		y	y	y	y		PP5015	PA5067	PP5015	PA5067	n	Histidine metabolism		G-->R association identical in PAO and PPU	15	15	15	15
316	IR08944	PMDPHT	'H2O + 5-Amino-6-(5''-phosphoribitylamino)uracil -> Orthophosphate + 4-(1-D-Ribitylamino)-5-amino-2,6-dihydroxypyrimidine '	G-->R association identical in iMO1056 and iJP829.		y	y	y	y		PP4565	PA1376	PP4565	PA1376	n	Riboflavin metabolism		G-->R association identical in PAO and PPU	15	15	15	15
317	IR00059	Porphobilinogen ammonia-lyase (polymerizing)	'H2O + 4 Porphobilinogen -> Hydroxymethylbilane + 4 NH4+ '	I don't see any difference here. PA5260 <==>PP0186		y	y	y	y		PP0186	PA5260	PP0186	PA5260	n	Porphyrin and chlorophyll metabolism		1modelnotreciprocal	15	15	15	15
318	IR02665	Precorrin 8X 11,12-methylmutase	'Precorrin 8X -> Hydrogenobyrinate + 6 H+ '	G-->R association identical in iMO1056 and iJP829.		y	y	y	y		PP4828	PA2905	PP4828	PA2905	n	Porphyrin and chlorophyll metabolism		G-->R association identical in PAO and PPU	15	15	15	15
319	IR07023	Precorrin-6Y:NADP+ oxidoreductase (R)	'Precorrin 6X + NADPH + H+ -> NADP+ + Precorrin 6Y '	G-->R association identical in iMO1056 and iJP829.		y	y	y	y		PP4832	PA2909	PP4832	PA2909	n	Porphyrin and chlorophyll metabolism		G-->R association identical in PAO and PPU	15	15	15	15
320	IR00841	Prephenate hydro-lyase (decarboxylating)	'Prephenate + H+ -> Phenylpyruvate + H2O + CO2 '	G-->R association identical in iMO1056 and iJP829.		y	y	y	y		PP1769	PA3166	PP1769	PA3166	n	Phenylalanine, tyrosine and tryptophan biosynthesis		G-->R association identical in PAO and PPU	15	15	15	15
321	IR00955	Prephenate:NAD+ oxidoreductase(decarboxylating)	'Prephenate + NAD+ -> 3-(4-Hydroxyphenyl)pyruvate + CO2 + NADH '	Remove PP1769 from the GPR of iJP /modification/ fixed gene associations 10/24/2009		y	y	y	y		( PP1770 and PP1769 )	PA3164	PP1770	PA3164	n	Phenylalanine, tyrosine and tryptophan biosynthesis		1modelnotreciprocal	14	15	14	15
322	IR01040	Propanoyl-CoA:carbon-dioxide ligase (ADP-forming)	'Propanoyl-CoA + HCO3 + ATP -> (S)-2-Methyl-3-oxopropanoyl-CoA + ADP + Orthophosphate + H+ '	PP4065 <--> PA2014 with 83% homology. Add PA2014 to iMO1056r as isozyme, since from blast homology these genes seem to have methylcrotonoyl-coa and propanoyl-coa carboxylase activity. Also, add (PP1996 AND PP1607) to iJP829r, and add (PA3112 AND PA3639) to iMO1056r, each as isozymes to the other genes. This is because acetyl-coa carboxylase also acts on propanoyl-coa and butanoyl-coa (EXPASY).		y	y	y	y		( PP4065 and PP4067 )	PA2012	(PP4065 and PP4067) or (PP1996 and PP1607)	(PA2012 or PA2014) or (PA3112 and PA3639)	n	Valine, leucine and isoleucine degradation		bothmodels_diffnum	14	14	14	14
323	IR03761	Protocatechuate:oxygen 3,4-oxidoreductase (decyclizing)	'3,4-Dihydroxybenzoate + Oxygen -> 3-Carboxy-cis,cis-muconate + 2 H+ '	G-->R association identical in iMO1056 and iJP829.		y	y	y	y		( PP4656 and PP4655 )	PA0154, PA0153	(PP4656 and PP4655)	PA0154 or PA0153	n	Benzoate degradation via hydroxylation		G-->R association identical in PAO and PPU	15	15	15	15
324	IR00156	Protoporphyrin ferro-lyase	'Iron + Protoporphyrin -> Heme + 2 H+ '	G-->R association identical in iMO1056 and iJP829.		y	y	y	y		PP0744	PA4655	PP0744	PA4655	n	Porphyrin and chlorophyll metabolism		G-->R association identical in PAO and PPU	15	15	15	15
325	IR08815	putrescine transport via ABC system	'Putrescine[e] + H2O + ATP -> ADP + Putrescine + Orthophosphate + H+ '	Association for #8815 based on annotated function. Structure is (potD and potC and potB and potA). iMO: ((PA0203 or PA0300 or PA0301 or PA0323 or PA0602 or PA0604 or PA3610) and (PA0204 or PA0304 or PA0324 or PA0606 or PA3253 or PA3609) and (PA0205 or PA0303 or PA0325 or PA0605 or PA3608) and (PA0206 or PA0302 or PA0326 or PA0603 or PA3254 or PA3607)). iJP: ((PP2195 or PP5181 or PP5180 or PP0412)…		y	y	y	y		( ( PP3845 ) or ( PP0414 and PP0412 and PP0411 and PP0413 ) or ( PP5341 ) or ( PP5181 and PP5177 and PP5178 and PP5180 and PP5179 ) )	PA0324 or PA0325 or PA0326 or PA0323 or PA0603 or PA0605 or PA0606 or PA0602 or PA0604 or PA0206 or PA0204 or PA0205 or PA0203 or PA3254 or PA3253 or PA3252 or PA3250 or PA0303 or PA0301 or PA0304 or PA0300 or PA0302 or PA3610 or PA3608 or PA3607 or PA3609	((PP2195 or PP5181 or PP5180 or PP0412) and (PP5177 or PP1482 or PP0414 or PP1723) and (PP5178 or PP0413) and (PP5179 or PP1484 or PP0411 or PP1722))	((PA0203 or PA0300 or PA0301 or PA0323 or PA0602 or PA0604 or PA3610) and (PA0204 or PA0304 or PA0324 or PA0606 or PA3253 or PA3609) and (PA0205 or PA0303 or PA0325 or PA0605 or PA3608) and (PA0206 or PA0302 or PA0326 or PA0603 or PA3254 or PA3607))	n	Transport		transport	14	14	14	14
326	IR03607	Putrescine:2-oxoglutarate aminotransferase	'Putrescine + 2-Oxoglutarate -> L-Glutamate + 4-Aminobutanal '	Change gene association in iJP for #3607 to PP5182, since this is 80% identical to PA0299 (which is a high confidence (class 1) putrescine aminotransferase).		y	y	y	y		PP4223	PA0299	PP5182	PA0299	n	Urea cycle and metabolism of amino groups		1model_reciprocal	14	15	14	15
327	IR06768	Pyridine-2,3-dicarboxylate + 2 H2O + Orthophosphate <=>Iminoaspartate + Glycerone phosphate (R)	'Iminoaspartate + Dihydroxyacetone phosphate -> 2 H2O + Pyridine-2,3-dicarboxylate + Orthophosphate + H+ '	G-->R association identical in iMO1056 and iJP829.		y	y	y	y		PP1231	PA1004	PP1231	PA1004	n	Nicotinate and nicotinamide metabolism		G-->R association identical in PAO and PPU	15	15	15	15
328	RR00142	Pyridoxine 5-phosphate:oxygen oxidoreductase (deaminating)	'Oxygen + Pyridoxine phosphate <=> Pyridoxal phosphate + H2O2 '	G-->R association identical in iMO1056 and iJP829.		y	y	y	y		PP1129	PA1049	PP1129	PA1049	n	Vitamin B6 metabolism		G-->R association identical in PAO and PPU	15	15	15	15
329	RR00942	Pyridoxine:oxygen oxidoreductase (deaminating)	'Oxygen + Pyridoxine <=> Pyridoxal + H2O2 '	G-->R association identical in iMO1056 and iJP829.		y	y	y	y		PP1129	PA1049	PP1129	PA1049	n	Vitamin B6 metabolism		G-->R association identical in PAO and PPU	15	15	15	15
330	IR00001	Pyrophosphate phosphohydrolase	'Pyrophosphate + H2O -> 2 Orthophosphate + H+ '	I don't see any difference here. PA4031<==>PP0558		y	y	y	y		PP0538	PA4031	PP0538	PA4031	n	Not assigned		1modelnotreciprocal	15	15	15	15
331	IR03527	Pyruvate:NAD+ 2-oxidoreductase (CoA-acetylating)	'Pyruvate + CoA + NAD+ -> Acetyl-CoA + CO2 + NADH '	Set the GPR of the reaction to be: "PP0338 and PP0339 and (PP4187 or PP5366)" and "PA5016 and PA5015 and (PA1587 or PA4829) for iJP and iMO, respectively. The paper (PMID: 2914869) say that out of three liponamide reductases in PPU two can take part in pyruvate dehydrogenase complex. We assume the same for PAO. PP00338<==>PA5016, PP03349<==>PA5015, PP4187 <==> PA1587, PP5366 <==>PA4829. Reactions…		y	y	y	y		( ( PP4403 ) or ( PP4187 ) or ( PP5366 ) or ( PP0554 and PP0339 and PP0555 ) or ( PP0338 ) or ( PP4404 ) or ( PP0553 ) )	PA5016, PA3416, PA3417, PA4829, PA5015	PP0338 and PP0339 and (PP4187 or PP5366)	PA5016 and PA5015 and (PA1587 or PA4829)	n	Alanine, aspartate and glutamate metabolism		1modelnotreciprocal	14	14	14	14
332	IR08872	RIBabc	'D-Ribose[e] + H2O + ATP -> ADP + Orthophosphate + D-Ribose + H+ '	Keep #8872 in both models with (PA1946 and PA1947 and PA1948) and (PP2454 and PP2455 and PP2456) associated. There are other low confidence ribose transporters, but their specificity is unclear (they are ID'd through fairly low homology).		y	y	y	y		( PP2456 and PP2459 and PP2455 and PP2454 )	PA0137+PA0138+PA0136, PA1947, PA1946, PA1948	(PP2454 and PP2455 and PP2456)	(PA1946 and PA1947 and PA1948)	n	Transport		transport	14	14	14	14
333	IR04298	riboflavin synthase	'3,4-dihydroxy-2-butanone 4-phosphate + 4-(1-D-Ribitylamino)-5-amino-2,6-dihydroxypyrimidine -> 2 H2O + Orthophosphate + 6,7-Dimethyl-8-(1-D-ribityl)lumazine '	G-->R association identical in iMO1056 and iJP829.		y	y	y	y		PP0517	PA4053	PP0517	PA4053	n	Riboflavin metabolism		G-->R association identical in PAO and PPU	15	15	15	15
334	IR04340	RNDR1	'ADP + Reduced thioredoxin -> H2O + dADP + Oxidized thioredoxin '	G-->R association identical in iMO1056 and iJP829.		y	y	y	y		( PP1179 and PP1177 )	PA1156, PA1155	(PP1179 and PP1177)	PA1156 or PA1155	n	Purine metabolism		G-->R association identical in PAO and PPU	15	15	15	15
335	IR04341	RNDR2	'GDP + Reduced thioredoxin -> H2O + dGDP + Oxidized thioredoxin '	G-->R association identical in iMO1056 and iJP829.		y	y	y	y		( PP1179 and PP1177 )	PA1156, PA1155	(PP1179 and PP1177)	PA1156 or PA1155	n	Purine metabolism		G-->R association identical in PAO and PPU	15	15	15	15
336	IR04343	RNDR3	'CDP + Reduced thioredoxin -> dCDP + H2O + Oxidized thioredoxin '	G-->R association identical in iMO1056 and iJP829.		y	y	y	y		( PP1179 and PP1177 )	PA1156, PA1155	(PP1179 and PP1177)	PA1156 or PA1155	n	Pyrimidine metabolism		G-->R association identical in PAO and PPU	15	15	15	15
337	IR04342	RNDR4	'UDP + Reduced thioredoxin -> H2O + dUDP + Oxidized thioredoxin '	G-->R association identical in iMO1056 and iJP829.		y	y	y	y		( PP1179 and PP1177 )	PA1155, PA1156	(PP1179 and PP1177)	PA1155 or PA1156	n	Pyrimidine metabolism		G-->R association identical in PAO and PPU	15	15	15	15
338	IR02666	S-Adenosyl-L-methionine:precorrin-3B C17-methyltransferase	'Precorrin 3B + S-Adenosyl-L-methionine -> Precorrin 4 + 3 H+ + S-Adenosyl-L-homocysteine '	G-->R association identical in iMO1056 and iJP829.		y	y	y	y		PP4826	PA2903	PP4826	PA2903	n	Porphyrin and chlorophyll metabolism		G-->R association identical in PAO and PPU	15	15	15	15
339	IR02667	S-adenosyl-L-methionine:precorrin-4 C11 methyltransferase	'Precorrin 4 + S-Adenosyl-L-methionine -> Precorrin 5 + H+ + S-Adenosyl-L-homocysteine '	G-->R association identical in iMO1056 and iJP829.		y	y	y	y		PP3410	PA2948	PP3410	PA2948	n	Porphyrin and chlorophyll metabolism		G-->R association identical in PAO and PPU	15	15	15	15
340	IR04289	S-adenosylmethione:2-demethylmenaquinone methyltransferase	'S-Adenosyl-L-methionine + 2-Demethylmenaquinone 8 -> Menaquinone 8 + H+ + S-Adenosyl-L-homocysteine '	Remove PA1772 from, add PA5063 to the GPR of the reaction in iMO, PA1772 does not catalyze this reaction. PP5011 <==> PA5063 /modification/ fixed gene associations 10/24/2009		y	y	y	y		PP5011	PA1772	PP5011	PA5063	n	Ubiquinone and other terpenoid-quinone biosynthesis		1modelnotreciprocal	15	14	15	14
341	IR00335	Sarcosine:oxygen oxidoreductase (demethylating)	'H2O + Sarcosine + Oxygen -> Glycine + H2O2 + Formaldehyde '	PP3775 --> PA2424 <--> PP4243 with 54% and 66% homology, respectively. Keep as is, for now. This is suspect though, since 1 enzyme (PP3775) does the work of 4 subunits (PP0323-PP0326). This is a (seemingly) real difference between PAO and PPU, since BLAST revealed nothing in PAO aside from the 4 subunits.		y	y	y	y		( ( PP3775 ) or ( PP0326 and PP0325 and PP0324 and PP0323 ) )	PA5416, PA5419, PA5417, PA5418	((PP3775) or (PP0326 and PP0325 and PP0324 and PP0323))	PA5416 or PA5419 or PA5417 or PA5418	n	Glycine, serine and threonine metabolism		bothmodels_diffnum	15	15	15	15
342	RR01018	Sedoheptulose-7-phosphate:D-glyceraldehyde-3-phosphateglyceronetransferase	'D-Glyceraldehyde 3-phosphate + Sedoheptulose 7-phosphate <=> D-Erythrose 4-phosphate + D-Fructose 6-phosphate '	G-->R association identical in iMO1056 and iJP829.		y	y	y	y		PP2168	PA2796	PP2168	PA2796	n	Pentose phosphate pathway		G-->R association identical in PAO and PPU	15	15	15	15
343	RR00689	Sedoheptulose-7-phosphate:D-glyceraldehyde-3-phosphateglycolaldehyde transferase	'D-Glyceraldehyde 3-phosphate + D-Fructose 6-phosphate <=> D-Xylulose 5-phosphate + D-Erythrose 4-phosphate '	G-->R association identical in iMO1056 and iJP829.		y	y	y	y		PP4965	PA0548	PP4965	PA0548	n	Carbon fixation in photosynthetic organisms		G-->R association identical in PAO and PPU	15	15	15	15
344	RR03769	Sedoheptulose-7-phosphate:D-glyceraldehyde-3-phosphateglycolaldehyde transferase	'D-Glyceraldehyde 3-phosphate + Sedoheptulose 7-phosphate <=> D-Ribose 5-phosphate + D-Xylulose 5-phosphate '	G-->R association identical in iMO1056 and iJP829.		y	y	y	y		PP4965	PA0548	PP4965	PA0548	n	Pentose phosphate pathway		G-->R association identical in PAO and PPU	15	15	15	15
345	RR01358	Shikimate:NADP+ 5-oxidoreductase	'Shikimate + NADP+ <=> NADPH + H+ + 3-Dehydroshikimate '	Remove PP2608 from the GPR in iJP, the evidence is too weak. Add the PA0244 as an isozyme to the GPR in iMO. PP0074<==>PA0025, PP2406 <==>PA0244 /modification/ (10/20/2009) This reaction should be present there was some mistake.		y	y	y	y		( PP0074 ) or ( PP2608 ) or ( PP2406 ) or ( PP3002 ) or ( PP3768 )	PA0025	PP0074 or PP2406 or PP3002 or PP3768	PA0025 or PA0244	n	Phenylalanine, tyrosine and tryptophan biosynthesis		1modelnotreciprocal	14	14	14	14
346	IR00662	sn-Glycero-3-phosphocholine glycerophosphohydrolase	'H2O + sn-Glycero-3-phosphocholine -> Choline + sn-Glycerol 3-phosphate + H+ '	Set the GPR of the reaction in iMO to PA2990. PA0347 is a periplasmatic enzyme so it does not act in the cytoplasm. PA2990<==>PP2152		y	y	y	y		PP2152	PA0347	PP2152	PA2990	n	Glycerophospholipid metabolism		other	15	14	15	14
347	IR00894	sn-Glycero-3-phosphoethanolamine glycerophosphohydrolase	'H2O + sn-Glycero-3-phosphoethanolamine -> sn-Glycerol 3-phosphate + Ethanolamine + H+ '	Set the GPR of the reaction in iMO to PA2990. PA0347 is a periplasmatic enzyme so it does not act in the cytoplasm. PA2990<==>PP2152		y	y	y	y		PP2152	PA0347	PP2152	PA2990	n	Glycerophospholipid metabolism		other	15	14	15	14
348	RR00519	sn-Glycerol-3-phosphate:NADP+ 2-oxidoreductase	'sn-Glycerol 3-phosphate + NADP+ <=> Dihydroxyacetone phosphate + NADPH + H+ '	remove PP4160 from reaction. PP4160 either doesn't exist (PseudoCAP), or is related to potassium uptake (kegg). /modification/ (10/20/2009) This reaction should be present there was some mistake.		y	y	y	y		( PP4160 ) or ( PP4169 )	PA1614	PP4169	PA1614	n	Glycerophospholipid metabolism		possible functional equivalents	14	15	14	15
349	IR08816	SPMDabc	'Spermidine[e] + H2O + ATP -> ADP + Orthophosphate + H+ + Spermidine '	Association for #8816 based on annotated function. Structure is (potD and potC and potB and potA). iMO: ((PA0203 or PA0300 or PA0301 or PA0323 or PA0602 or PA0604 or PA3610) and (PA0204 or PA0304 or PA0324 or PA0606 or PA3253 or PA3609) and (PA0205 or PA0303 or PA0325 or PA0605 or PA3608) and (PA0206 or PA0302 or PA0326 or PA0603 or PA3254 or PA3607)). iJP: ((PP2195 or PP5181 or PP5180 or PP0412)…		y	y	y	y		( ( PP3845 ) or ( PP0414 and PP0412 and PP0411 and PP0413 ) or ( PP5341 ) or ( PP5181 and PP5177 and PP5178 and PP5180 and PP5179 ) )	PA0324 or PA0325 or PA0326 or PA0323 or PA0204 or PA0206 or PA0205 or PA0203 or PA3254 or PA3253 or PA3252 or PA3250 or PA0603 or PA0605 or PA0606 or PA0602 or PA0604 or PA3610 or PA3608 or PA3607 or PA3609	((PP2195 or PP5181 or PP5180 or PP0412) and (PP5177 or PP1482 or PP0414 or PP1723) and (PP5178 or PP0413) and (PP5179 or PP1484 or PP0411 or PP1722))	((PA0203 or PA0300 or PA0301 or PA0323 or PA0602 or PA0604 or PA3610) and (PA0204 or PA0304 or PA0324 or PA0606 or PA3253 or PA3609) and (PA0205 or PA0303 or PA0325 or PA0605 or PA3608) and (PA0206 or PA0302 or PA0326 or PA0603 or PA3254 or PA3607))	n	Transport		transport	14	14	14	14
350	RR04368	succinate dehyrdogenase	'Ubiquinone-8 + FADH2 <=> FAD + Ubiquinol-8 '	G-->R association identical in iMO1056 and iJP829.		y	y	y	y		( PP4190 and PP4191 and PP4192 and PP4193 )	PA1582, PA1584, PA1581, PA1583	(PP4190 and PP4191 and PP4192 and PP4193)	PA1582 or PA1584 or PA1581 or PA1583	n	Reductive carboxylate cycle (CO2 fixation)		G-->R association identical in PAO and PPU	15	15	15	15
351	RR00219	Succinate:(acceptor) oxidoreductase	'FAD + Succinate <=> Fumarate + FADH2 '	G-->R association identical in iMO1056 and iJP829.		y	y	y	y		( PP4190 and PP4191 and PP4192 and PP4193 )	PA1581+PA1584+PA1582+PA1583	(PP4190 and PP4191 and PP4192 and PP4193)	PA1581 and PA1584 and PA1582 and PA1583	n	Butanoate metabolism		G-->R association identical in PAO and PPU	15	15	15	15
352	RR00216	Succinate:CoA ligase (ADP-forming)	'Succinate + ATP + CoA <=> Succinyl-CoA + ADP + Orthophosphate '	G-->R association identical in iMO1056 and iJP829.		y	y	y	y		( PP4185 and PP4186 )	PA1588, PA1589	(PP4185 and PP4186)	PA1588 or PA1589	n	Citrate cycle (TCA cycle)		G-->R association identical in PAO and PPU	15	15	15	15
353	IR02434	Succinyl-CoA:2,3,4,5-tetrahydropyridine-2-carboxylateN-succinyltransferase	'Succinyl-CoA + H2O + 2,3,4,5-Tetrahydrodipicolinate -> N-Succinyl-2-L-amino-6-oxoheptanedioate + CoA '	G-->R association identical in iMO1056 and iJP829.		y	y	y	y		PP1530	PA3666	PP1530	PA3666	n	Lysine biosynthesis		G-->R association identical in PAO and PPU	15	15	15	15
[truncated: 1,045 more rows]

## Sheet: 5.b Key to Reconcil. changes
Table 5.b: Code for reconciliation changes in reconciliation notes:
Removed – gene(s) removed		1
Removed – secondary gene function removed		2
Removed – gene non-associated reactions		3
Redundant alternative stoichiometry removed		4
Function implementation change		5
Reimplementation of full pathways		6
Reimplementation of organism-specific reactions		7
Function-neutral stochiometry change		8
Reversibility change		9
[truncated: 6 more rows]

## Sheet: 6 biologaccuracy
Table 6: Accuracy of substrate utilization predictions. Statistics of match between BIOLOG substrate utilization results and in silico predictions of substrate utilization, as shown in Table 2 (in main text).
[truncated: 7 more rows]

[truncated: 4 more sheets: 7 yields, 8 gene essentiality in PAO, 9 essentiality changes in PAO, 10 changing in silico medium]
